# Supplementary material
Source: publisher site journal article supplement (https://www.spandidos-publications.com/2276/downloadSupplementary)
Supplement: Supplementary file 1 [file downloadSupplementary]

## Sheet: Simple Normalized Data
Table SII. microRNA signals in CD4+ T cells from healthy and pSS naïve, pSS activation, MSC treatment and pre-IFN-γ MSC treatment groups.
		healthy naïve	pSS naïve	pSS activation	MSC treatment	pre-IFN-γ MSC treatment
Index	Reporter Name	Signal	Signal	Signal	Signal	Signal
3	hsa-let-7a-5p	6556.87	3962.89	7495.08	3905.58	5999.75
5	hsa-let-7b-5p	1760.97	892.461	1415.06	626.466	660.334
7	hsa-let-7c-5p	3172.62	2549.63	2659.22	2059.22	2041.06
9	hsa-let-7d-5p	6201.75	2793.8	3840.14	3165.38	3055.19
11	hsa-let-7e-5p	1061.51	1568.87	2148.45	1266.06	1587.77
14	hsa-let-7f-5p	10047.5	5872.35	8890.67	7958.11	7215.17
16	hsa-let-7g-5p	10526	10739.4	13320.7	12753.8	8497.23
18	hsa-let-7i-5p	3140.54	4038.29	4651.88	2656.85	2752
22	hsa-miR-7-5p	244.311	466.786	466.322	804.314	636.17
30	hsa-miR-15a-5p	1615.3	3539.46	1264.98	1243.99	837.71
32	hsa-miR-15b-5p	5026.96	4287.12	2313.35	3331.63	3055.95
35	hsa-miR-16-5p	11360.7	13120.7	9728.42	11129.8	11165.1
37	hsa-miR-17-5p	444.893	547.939	560.504	962.396	805.176
41	hsa-miR-18b-5p	545.077	14.698	15.6205	31.5297	13.9309
52	hsa-miR-21-5p	4620.97	7664.34	11261	11635.7	9214.66
53	hsa-miR-22-3p	701.4	1011.28	377.16	659.333	191.399
62	hsa-miR-24-3p	4403.99	4601.62	3433.82	3658.7	1917.8
63	hsa-miR-25-3p	1590.32	1834.44	2428.95	2790.66	5018.68
67	hsa-miR-26a-5p	20293.9	16281.9	20862.6	23494.5	12791.1
70	hsa-miR-27a-3p	1609.52	1950.86	1269.83	1894.63	707.771
72	hsa-miR-27b-3p	392.605	521.583	607.68	338.959	320.331
76	hsa-miR-29a-3p	7176.75	6642.14	9347.97	10873.2	6901.14
80	hsa-miR-29b-3p	3939.5	12294.5	19233.4	17749.2	10559
81	hsa-miR-29c-3p	1357.14	2291.77	3894.78	1791.86	2955.66
84	hsa-miR-30a-5p	2394.04	3812.17	1844.71	1356	1316
86	hsa-miR-30b-5p	13198.2	10123.5	9238.78	8526.89	7552.53
87	hsa-miR-30c-1-3p	30.9005	30.965	2326.57	3011.97	869.629
89	hsa-miR-30c-5p	6690.22	6103.52	5541.99	3909.33	5079.33
91	hsa-miR-30d-5p	273.027	1761.05	610.486	627.613	554.446
93	hsa-miR-30e-5p	3903.31	5935.94	2226.77	2269.66	1800.01
95	hsa-miR-31-5p	1096.55	989.233	303.218	422.691	259.779
97	hsa-miR-32-5p	170.062	378.962	201.621	99.6187	85.5474
110	hsa-miR-92a-3p	5267.96	2689.14	3044.34	4915.99	4587.77
111	hsa-miR-92b-3p	4179.6	1547.82	1636.09	3500.22	2178.97
120	hsa-miR-98-5p	266.194	211.937	763.992	190.329	704.842
127	hsa-miR-101-3p	503.421	1048.69	344.255	474.464	91.7416
130	hsa-miR-103a-3p	2101.64	1295.33	1006.65	1346	626.185
135	hsa-miR-106a-5p	424.155	503.3	549.438	993.632	760.846
138	hsa-miR-107	1903.92	1333.82	992.347	1241.99	634.357
144	hsa-miR-125a-5p	2013.55	685.922	406.256	391.651	242.56
147	hsa-miR-125b-5p	743.851	140.661	50.3847	222.584	138.227
181	hsa-miR-140-3p	6206.41	5668.03	1590.53	1920.55	1509.91
185	hsa-miR-142-3p	745.651	3228.25	2088.11	1393.24	877.546
186	hsa-miR-142-5p	4545.85	15965.3	13421.2	9798.6	7791.31
194	hsa-miR-146a-5p	6816.85	10629.6	11570.3	5761.14	10709.2
196	hsa-miR-146b-5p	6476.23	11840.7	10077.4	4730.77	11221.5
199	hsa-miR-148a-3p	660.009	625.385	164.231	192.759	86.1272
201	hsa-miR-148b-3p	822.626	539.798	148.855	277.21	143.441
203	hsa-miR-149-3p	309.255	640.499	802.942	498.117	552.812
206	hsa-miR-150-5p	37707.5	21900.4	30145.6	54244.3	21617.2
208	hsa-miR-151a-5p	1277.54	720.607	212.216	275.365	119.47
209	hsa-miR-151b	1067.48	531.337	176.177	267.79	139.134
217	hsa-miR-155-5p	1319.72	1015.46	11711.2	18353.7	18784.3
220	hsa-miR-181a-5p	4915.09	5150.57	1971.12	1970.57	1195.91
222	hsa-miR-181b-5p	462.671	526.096	213.48	218.539	96.7527
224	hsa-miR-181c-5p	547.476	906.143	89.8966	126.182	146.044
235	hsa-miR-186-5p	1751.26	1931.05	838.238	1005.05	574.614
244	hsa-miR-191-5p	7885.05	5824.96	2875.46	3826.84	2864.49
252	hsa-miR-194-5p	956.982	647.745	192.408	189.383	51.2931
254	hsa-miR-195-5p	162.509	427.957	303.845	61.0409	557.807
259	hsa-miR-197-3p	839.796	408.355	157.786	273.919	132.379
308	hsa-miR-221-3p	999.684	743.164	919.92	1557.69	954.186
310	hsa-miR-222-3p	1874.71	1504.47	1756.09	2191.65	1956.49
336	hsa-miR-320a	1073.87	419.234	244.037	340.43	221.704
337	hsa-miR-320b	837.039	356.21	161.406	269.139	126.773
338	hsa-miR-320c	898.867	360.037	170.156	289.84	123.306
339	hsa-miR-320d	873.899	343.326	155.894	258.929	98.9598
340	hsa-miR-320e	807.98	287.664	162.731	230.128	86.3792
367	hsa-miR-342-3p	16743.6	9694.94	7961.86	9582.72	4922.68
368	hsa-miR-342-5p	947.851	414.111	205.806	165.253	97.2347
373	hsa-miR-361-5p	863.356	506.1	188.259	199.882	97.6121
396	hsa-miR-374a-5p	207.062	924.781	953.223	249.291	595.16
398	hsa-miR-374b-5p	814.299	1437.96	764.371	475.303	692.431
400	hsa-miR-374c-5p	625.658	785.386	569.2	250.155	551.813
444	hsa-miR-423-5p	1756.16	835.261	241.787	378.124	367.95
448	hsa-miR-425-5p	1796.35	1083.41	299.931	484.26	404.435
467	hsa-miR-451a	2738.14	1280.94	243.048	976.136	329.274
475	hsa-miR-466	261.409	891.628	362.499	350.108	2123.76
675	hsa-miR-548ay-5p	733.987	7.36742	16.1087	0.00045509	9.64825
681	hsa-miR-550a-5p	7.04133	597.867	6.04007	6.49684	24.6388
794	hsa-miR-638	828.437	930.806	1443.95	1788.5	1135.37
834	hsa-miR-664b-3p	1456.23	476.118	146.632	201.644	91.1401
858	hsa-miR-762	103.023	195.557	328.653	601.455	284.244
966	hsa-miR-1246	220.361	485.313	4553.09	2409.02	7225.02
986	hsa-miR-1260b	2104.78	1049.98	453.924	438.571	565.341
1008	hsa-miR-1273g-3p	2305.35	1593.06	4494.64	4262.24	4254.43
1012	hsa-miR-1275	129.606	430.693	2978.61	1144.61	1828.55
1089	hsa-miR-1973	955.659	499.009	433.09	593.167	535.126
1097	hsa-miR-2114-5p	630.494	6.60286	6.33814	0.000432944	0.0112388
1098	hsa-miR-2115-3p	0.0239916	0.00281063	0.0412973	0.000298348	518.306
1175	hsa-miR-3150b-3p	149.843	167.054	43.5905	114.814	2142.6
1213	hsa-miR-3178	272.816	329.801	372.128	1087.25	792.893
1241	hsa-miR-3196	1522.04	1824.41	2257.4	2190.89	1368.55
1257	hsa-miR-3607-3p	1526.56	1271.9	676.247	15.528	399.299
1258	hsa-miR-3607-5p	5900.19	5789.3	1154.35	226.154	533.905
1259	hsa-miR-3609	1618.25	904.731	250.717	271.131	147.144
1276	hsa-miR-3620-5p	54.4069	33.8759	530.249	156.803	143.064
1291	hsa-miR-3656	482.702	825.026	1259.54	1905	985.267
1302	hsa-miR-3665	1690.02	3020.45	3617.7	5502.7	3912.03
1383	hsa-miR-3940-5p	583.492	634.628	1104.99	764.05	903.917
1391	hsa-miR-3960	3723.31	4321.7	5680.22	8457.11	5042.31
1415	hsa-miR-4267	8959.65	9922.17	14724.4	30810.3	56537.8
1429	hsa-miR-4281	234.737	546.904	758.811	772.073	814.811
1449	hsa-miR-4301	111.017	104.79	889.368	256.744	294.266
1512	hsa-miR-4443	5308.1	5634.54	2602.83	7122.61	4819.58
1518	hsa-miR-4447	137.471	475.506	1813.13	1057.89	1536.25
1543	hsa-miR-4472	257.336	298.665	2384.8	2181.55	1898.07
1558	hsa-miR-4484	37.5322	80.2517	1255.61	2030.07	2154.73
1562	hsa-miR-4488	864.553	901.857	2185.05	2422.68	1990.13
1566	hsa-miR-4492	56.6774	44.7862	739.903	303.03	201.338
1571	hsa-miR-4497	414.159	358.877	1426.27	1297.49	1199.24
1579	hsa-miR-4505	87.4635	105.241	902.577	627.278	255.469
1582	hsa-miR-4508	249.676	325.292	1740.92	2177.06	703.35
1588	hsa-miR-4514	116.234	107.831	50.2122	162.034	161.421
1590	hsa-miR-4516	459.076	1450.25	1946.63	2861.66	2648.09
1610	hsa-miR-4530	135.118	149.946	353.462	739.87	300.434
1622	hsa-miR-4632-3p	631.76	125.739	0.0106458	14.0258	0.0103017
1631	hsa-miR-4638-5p	329.17	596.903	2680.25	6064.86	2167.62
1708	hsa-miR-4687-3p	164.381	359.659	1168.61	1315.1	1446.05
1713	hsa-miR-4690-5p	8727.71	8335.15	10088.2	7661.33	26993.6
1787	hsa-miR-4734	2908.78	12777	3175.02	18242.4	137832
1873	hsa-miR-4787-5p	273.406	1317.46	1493.63	2504.63	1191
1938	hsa-miR-5096	354.794	1656.25	4480.29	1075.53	56176.4
2019	hsa-miR-5787	168.4	255.055	722.946	622.846	710.006
2025	hsa-miR-6073	37.5157	48.655	1262.64	58.5951	573.891
2037	hsa-miR-6085	428.733	416.789	942.978	597.573	656.105
2039	hsa-miR-6087	1497.28	2228.14	5034.12	6319.77	6164.8
2041	hsa-miR-6089	335.704	3779.45	4870.24	6885.32	4988.6
2042	hsa-miR-6090	999.232	3095.49	5090.51	5263.12	12914
2044	hsa-miR-6125	502.097	801.917	895.869	1397.67	907.22
2045	hsa-miR-6126	26.3688	86.9019	847.344	2328.5	734.471
2052	hsa-miR-6133	602.515	1734.69	1119.76	1454.1	15160.9
2078	hsa-miR-6510-5p	2931.8	7501.97	3648.16	596.424	6801.17
2111	hsa-miR-6727-5p	2973.25	5230.65	5129.72	4196.47	4192.78
2115	hsa-miR-6729-5p	332.589	478.099	766.747	769.41	580.015
2216	hsa-miR-6779-5p	55.062	115.573	671.506	388.191	429.355
2242	hsa-miR-6791-5p	140.026	309.354	1428.58	1273.06	1093.19
2266	hsa-miR-6803-5p	401.787	604.539	2045.68	2263.71	2096.11
2347	hsa-miR-6845-3p	150.228	5.95491	7.10042	15.2411	601.092
2456	hsa-miR-7110-5p	3650.48	6928.93	3568.92	1881.68	5985.67
2465	hsa-miR-7150	100.701	150.015	2893.96	1348.48	1419.08
2491	hsa-miR-7641	700.743	1041.16	9403.57	9780.96	12086.2
2494	hsa-miR-7704	2388.88	2033.95	1277.59	1957.84	1796.42
2516	hsa-miR-7977	185.421	567.944	511.943	1677.85	1348.38
pSS, primary Sjögren syndrome; MSC, mesenchymal stem cell.

## Sheet: Normalized Data
		S01 A2-cy3 Signal			S02 A1-cy3 Signal			S03 A3-cy3 Signal			S04 A4-cy3 Signal			S05 B1-cy3 Signal			S06 B2-cy3 Signal			S07 B3-cy3 Signal			S08 B4-cy3 Signal									MRA-1001LCB_miRHuman_20.xls
Index	Reporter Name	Mean	StDev	p-value	Mean	StDev	p-value	Mean	StDev	p-value	Mean	StDev	p-value	Mean	StDev	p-value	Mean	StDev	p-value	Mean	StDev	p-value	Mean	StDev	p-value	Target Sequence (5' to 3')	Reporter Group	Reporter Control Type	Note	Reporter Source	Accession No.	Reporter Name	Human
1	hsa-let-7a-2-3p	0.0739216	6.93765	1	1.89047	3.39114	0.575679	0.00896082	4.35856	1	0.0354479	3.19671	1	3.53304	18.5195	0.591302	3.50494	9.87694	0.635703	25.095	19.1718	3.47225e-09	0.0124786	8.10349	1	CUGUACAGCCUCCUAGCUUUCC	experimental		mature miRNA	standard	MIMAT0010195	hsa-let-7a-2-3p	hsa-let-7a-2-3p
2	hsa-let-7a-3p	3.91542	12.7869	0.886887	3.57864	10.9783	1	14.9561	15.1803	0.486369	36.863	11.7985	0.00667	9.65492	24.321	0.631757	26.7466	18.8479	0.0523504	11.9896	46.0674	0.419849	10.4079	12.9794	0.618028	CUAUACAAUCUACUGUCUUUC	experimental		mature miRNA	standard	MIMAT0004481	hsa-let-7a-3p	hsa-let-7a-3p
3	hsa-let-7a-5p	7505.52	1821.16	4.10299e-05	6556.87	479.063	1.37621e-39	5554.99	632.279	2.58806e-18	8720.12	399.736	9.70757e-106	3962.89	484.902	1.92778e-16	7495.08	568.98	5.76015e-40	3905.58	215.698	7.08322e-93	5999.75	553.867	1.67818e-24	UGAGGUAGUAGGUUGUAUAGUU	experimental		mature miRNA	standard	MIMAT0000062	hsa-let-7a-5p	hsa-let-7a-5p
4	hsa-let-7b-3p	26.7111	11.5882	0.00865434	40.099	9.94358	0.0102532	19.0528	6.66448	0.0762698	28.3956	7.40644	0.000715937	29.6304	24.239	0.182147	13.6973	8.59763	0.0280744	33.0862	19.5036	1.03744e-05	1.19553	5.43078	0.891036	CUAUACAACCUACUGCCUUCCC	experimental		mature miRNA	standard	MIMAT0004482	hsa-let-7b-3p	hsa-let-7b-3p
5	hsa-let-7b-5p	1703.36	95.1947	1.22409e-74	1760.97	162.063	2.61547e-27	907.927	65.9329	1.97127e-39	1755.59	79.2433	1.79265e-109	892.461	160.262	2.29552e-08	1415.06	110.219	5.0826e-40	626.466	30.7997	1.13303e-105	660.334	57.843	2.81665e-20	UGAGGUAGUAGGUUGUGUGGUU	experimental		mature miRNA	standard	MIMAT0000063	hsa-let-7b-5p	hsa-let-7b-5p
6	hsa-let-7c-3p	0.0799127	4.02091	1	0.00822306	4.52395	1	0.00923105	7.58086	1	0.0465321	2.74867	1	0.360886	15.4574	0.92692	11.3086	10.2239	0.193077	7.36315	17.3456	0.000512367	0.0179097	7.00418	1	CUGUACAACCUUCUAGCUUUCC	experimental		mature miRNA	standard	MIMAT0026472	hsa-let-7c-3p	hsa-let-7c-3p
7	hsa-let-7c-5p	4377.4	106.068	0	3172.62	127.21	9.56883e-138	3788.99	134.489	8.63551e-171	5493.89	177.967	8.65746e-210	2549.63	181.568	1.07554e-45	2659.22	124.751	4.66041e-104	2059.22	87.2905	1.61995e-126	2041.06	147.207	2.34629e-36	UGAGGUAGUAGGUUGUAUGGUU	experimental		mature miRNA	standard	MIMAT0000064	hsa-let-7c-5p	hsa-let-7c-5p
8	hsa-let-7d-3p	73.0188	9.6945	2.99499e-23	205.393	28.3983	8.45738e-09	41.9151	13.5771	0.0385253	45.9789	11.7109	0.000125827	85.7595	31.1842	0.00968544	47.9641	22.6263	0.0029799	107.958	25.1598	7.2692e-12	28.7742	8.38633	0.0257842	CUAUACGACCUGCUGCCUUUCU	experimental		mature miRNA	standard	MIMAT0004484	hsa-let-7d-3p	hsa-let-7d-3p
9	hsa-let-7d-5p	7900.67	210.683	0	6201.75	306.545	2.47757e-91	4819.92	107.155	0	199.45	62.4202	0.00107233	2793.8	413.579	8.26382e-12	3840.14	183.92	8.64986e-99	3165.38	109.838	1.2045e-185	3055.19	155.178	1.46859e-74	AGAGGUAGUAGGUUGCAUAGUU	experimental		mature miRNA	standard	MIMAT0000065	hsa-let-7d-5p	hsa-let-7d-5p
10	hsa-let-7e-3p	0.0953223	3.85507	1	0.00692936	5.41351	1	0.00866959	8.18589	1	0.0446317	3.87222	1	2.37746	26.1196	0.752754	0.0132998	9.35651	1	4.16275	17.4273	0.0058795	0.0150664	7.53989	1	CUAUACGGCCUCCUAGCUUUCC	experimental		mature miRNA	standard	MIMAT0004485	hsa-let-7e-3p	hsa-let-7e-3p
11	hsa-let-7e-5p	1830.79	74.6613	6.71317e-138	1061.51	123.487	1.12799e-17	2630.88	125.794	7.06447e-94	4756.66	130.436	6.14334e-292	1568.87	84.0735	7.41116e-80	2148.45	125.016	5.9877e-69	1266.06	84.6915	2.19536e-53	1587.77	207.961	7.43821e-12	UGAGGUAGGAGGUUGUAUAGUU	experimental		mature miRNA	standard	MIMAT0000066	hsa-let-7e-5p	hsa-let-7e-5p
12	hsa-let-7f-1-3p	3.21899	8.66935	0.87172	3.06416	7.09966	0.768811	0.0132232	6.57245	1	30.3025	5.35169	6.32561e-05	4.83202	18.7743	0.647008	30.3953	16.9855	0.0276116	11.4841	14.2464	0.000213559	0.0173971	8.33892	1	CUAUACAAUCUAUUGCCUUCCC	experimental		mature miRNA	standard	MIMAT0004486	hsa-let-7f-1-3p	hsa-let-7f-1-3p
13	hsa-let-7f-2-3p	0.0765397	5.49398	1	0.0110591	6.11412	1	0.0116628	6.43522	1	20.8595	5.34955	0.0655609	0.00168898	18.8523	1	17.7914	9.04688	0.0329201	6.58577	9.9521	1.38604e-06	0.0230225	8.74953	1	CUAUACAGUCUACUGUCUUUCC	experimental		mature miRNA	standard	MIMAT0004487	hsa-let-7f-2-3p	hsa-let-7f-2-3p
14	hsa-let-7f-5p	14303.2	195.017	0	10047.5	297.828	2.52919e-250	8813.21	944.638	1.54552e-20	11628.3	277.156	0	5872.35	464.762	2.2634e-37	8890.67	426.16	2.32742e-97	7958.11	223.259	1.36986e-276	7215.17	382.55	7.30301e-75	UGAGGUAGUAGAUUGUAUAGUU	experimental		mature miRNA	standard	MIMAT0000067	hsa-let-7f-5p	hsa-let-7f-5p
15	hsa-let-7g-3p	0.083318	3.89844	1	2.30146	11.1451	0.835487	17.7742	32.4161	0.645015	0.0410219	3.84535	1	0.00129282	16.1791	1	0.0127677	10.3902	1	4.7346	11.2144	0.000304105	0.0148442	4.58082	1	CUGUACAGGCCACUGCCUUGC	experimental		mature miRNA	standard	MIMAT0004584	hsa-let-7g-3p	hsa-let-7g-3p
16	hsa-let-7g-5p	18750.7	287.633	0	10526	1218.46	4.9983e-18	13744.7	3308.44	3.43515e-05	786.641	844.482	0.348032	10739.4	733.208	2.89465e-49	13320.7	273.929	0	12753.8	309.669	0	8497.23	967.427	1.32144e-17	UGAGGUAGUAGUUUGUACAGUU	experimental		mature miRNA	standard	MIMAT0000414	hsa-let-7g-5p	hsa-let-7g-5p
17	hsa-let-7i-3p	0.0543232	7.14994	1	7.99517	11.2417	0.629018	0.00859071	5.63847	1	0.0296287	2.44715	1	238.238	109.191	0.00947646	0.00948466	9.86077	1	1.82021	14.6026	0.111868	42.3278	90.7668	0.62708	CUGCGCAAGCUACUGCCUUGCU	experimental		mature miRNA	standard	MIMAT0004585	hsa-let-7i-3p	hsa-let-7i-3p
18	hsa-let-7i-5p	4489.71	225.815	3.23947e-89	3140.54	193.508	9.735e-60	2431.73	419.007	1.20003e-08	4006.43	193.841	3.1896e-95	4038.29	1034.79	8.26219e-05	4651.88	188.129	2.45275e-137	2656.85	119.839	5.07464e-109	2752	144.14	7.71223e-70	UGAGGUAGUAGUUUGUGCUGUU	experimental		mature miRNA	standard	MIMAT0000415	hsa-let-7i-5p	hsa-let-7i-5p
19	hsa-miR-1	3.00974	12.7834	1	0.0107659	8.66039	1	0.0112593	13.3004	1	1.68628	6.97055	1	0.0064934	24.6794	1	4.34278	19.2097	1	0.555123	40.3835	0.92407	1.26514	11.8942	1	UGGAAUGUAAAGAAGUAUGUAU	experimental		mature miRNA	standard	MIMAT0000416	hsa-miR-1	hsa-miR-1
20	hsa-miR-7-1-3p	136.918	35.0971	4.07774e-06	422.36	95.7489	4.78794e-05	134.937	39.1819	0.00404192	190.099	30.1539	1.12437e-10	198.646	67.3168	0.00563685	96.8831	31.41	3.84525e-05	141.738	50.8777	1.03069e-05	114.568	29.7993	0.00891435	CAACAAAUCACAGUCUGCCAUA	experimental		mature miRNA	standard	MIMAT0004553	hsa-miR-7-1-3p	hsa-miR-7-1-3p
21	hsa-miR-7-2-3p	0.404164	9.39472	1	0.0138943	9.10057	1	0.114844	11.6137	1	13.449	9.06973	0.460965	0.407361	24.5595	1	5.22815	16.7298	0.78722	5.37481	52.661	0.546256	3.82234	13.5269	0.884237	CAACAAAUCCCAGUCUACCUAA	experimental		mature miRNA	standard	MIMAT0004554	hsa-miR-7-2-3p	hsa-miR-7-2-3p
22	hsa-miR-7-5p	121.498	31.9196	9.47094e-06	244.311	57.096	0.000185866	158.821	34.1002	0.00012478	446.41	43.8523	2.63516e-25	466.786	107.729	2.36142e-05	466.322	55.2204	2.1264e-22	804.314	76.7746	1.41242e-31	636.17	85.0109	9.36382e-10	UGGAAGACUAGUGAUUUUGUUGU	experimental		mature miRNA	standard	MIMAT0000252	hsa-miR-7-5p	hsa-miR-7-5p
23	hsa-miR-9-3p	2.08475	11.1774	1	3.11816	11.1051	0.997766	7.78153	28.9241	0.885332	3.46	8.19478	0.891229	6.02236	23.8876	0.671004	9.58353	20.3532	0.561006	3.57873	41.5743	0.679831	1.99692	11.6196	0.914047	AUAAAGCUAGAUAACCGAAAGU	experimental		mature miRNA	standard	MIMAT0000442	hsa-miR-9-3p	hsa-miR-9-3p
24	hsa-miR-9-5p	0.0701962	10.0883	1	2.135	10.9346	0.946886	0.0106865	13.4699	1	6.18674	9.89043	0.73922	3.91083	28.0351	0.757534	2.14817	16.8736	0.917858	2.79715	40.7176	0.715097	2.02314	12.566	1	UCUUUGGUUAUCUAGCUGUAUGA	experimental		mature miRNA	standard	MIMAT0000441	hsa-miR-9-5p	hsa-miR-9-5p
25	hsa-miR-10a-3p	53.1004	106.233	0.901045	0.00970109	9.46073	1	0.0918755	11.8242	1	7.45082	6.27616	0.697245	0.344998	23.1004	1	0.0160591	16.9618	1	0.752629	39.5806	0.88887	0.680658	10.6006	1	CAAAUUCGUAUCUAGGGGAAUA	experimental		mature miRNA	standard	MIMAT0004555	hsa-miR-10a-3p	hsa-miR-10a-3p
26	hsa-miR-10a-5p	62.2064	21.2035	0.000184069	97.8918	43.0863	0.0848489	51.8845	24.6239	0.138575	103.793	22.4178	4.64275e-06	38.5885	31.7294	0.240098	26.1269	24.3299	0.132702	36.6892	45.7587	0.116384	10.2922	13.3414	0.635348	UACCCUGUAGAUCCGAAUUUGUG	experimental		mature miRNA	standard	MIMAT0000253	hsa-miR-10a-5p	hsa-miR-10a-5p
27	hsa-miR-10b-3p	0.108426	5.06579	1	0.00836211	3.60146	1	0.0100121	5.77885	1	0.231027	3.8216	0.9903	0.00119236	18.654	1	0.0156616	7.51091	1	1.6019	11.2105	0.0322164	0.0196786	6.97256	1	ACAGAUUCGAUUCUAGGGGAAU	experimental		mature miRNA	standard	MIMAT0004556	hsa-miR-10b-3p	hsa-miR-10b-3p
28	hsa-miR-10b-5p	29.5221	10.332	8.32919e-05	17.7348	5.90383	0.133499	71.4301	8.41363	8.07064e-10	154.598	12.9483	5.11324e-33	16.1504	23.3588	0.489797	24.805	13.7671	0.0125433	42.9514	12.8025	1.09653e-13	60.5116	44.5675	0.378053	UACCCUGUAGAACCGAAUUUGUG	experimental		mature miRNA	standard	MIMAT0000254	hsa-miR-10b-5p	hsa-miR-10b-5p
29	hsa-miR-15a-3p	11.1303	11.223	0.787455	1.35798	9.67638	1	3.74466	20.4268	1	4.71766	8.21432	0.959168	0.00161262	24.0477	1	0.294073	18.1198	1	1.29918	40.6647	0.78747	13.3384	40.3003	0.91937	CAGGCCAUAUUGUGCUGCCUCA	experimental		mature miRNA	standard	MIMAT0004488	hsa-miR-15a-3p	hsa-miR-15a-3p
30	hsa-miR-15a-5p	956.46	120.4	7.05972e-15	1615.3	111.452	2.60329e-42	820.634	84.4358	5.66411e-20	1138.72	73.4664	5.61649e-55	3539.46	214.563	3.01704e-62	1264.98	86.3109	9.11901e-55	1243.99	113.228	5.6303e-14	837.71	104.246	3.20498e-10	UAGCAGCACAUAAUGGUUUGUG	experimental		mature miRNA	standard	MIMAT0000068	hsa-miR-15a-5p	hsa-miR-15a-5p
31	hsa-miR-15b-3p	25.0582	8.82917	0.00280205	360.119	46.2611	9.52859e-11	0.0145195	7.60472	1	36.992	9.2853	0.00123544	6.15271	15.8644	0.632414	22.0558	14.348	0.0319813	22.9186	15.9911	1.14346e-05	27.3941	11.803	0.122355	CGAAUCAUUAUUUGCUGCUCUA	experimental		mature miRNA	standard	MIMAT0004586	hsa-miR-15b-3p	hsa-miR-15b-3p
32	hsa-miR-15b-5p	3104.49	98.6311	3.23183e-222	5026.96	112.514	0	2521.81	132.821	1.1967e-77	2290.27	107.952	2.27423e-100	4287.12	234.776	1.01358e-75	2313.35	91.3382	1.32669e-146	3331.63	96.8799	2.63101e-263	3055.95	205.467	2.63823e-43	UAGCAGCACAUCAUGGUUUACA	experimental		mature miRNA	standard	MIMAT0000417	hsa-miR-15b-5p	hsa-miR-15b-5p
33	hsa-miR-16-1-3p	6.16753	15.9295	1	0.0108283	9.23246	1	5.29748	20.2298	0.962605	1.87947	6.91378	1	1.90428	45.3681	0.912007	0.0189205	19.6815	1	0.419527	42.4865	0.97232	0.0229452	12.9101	1	CCAGUAUUAACUGUGCUGCUGA	experimental		mature miRNA	standard	MIMAT0004489	hsa-miR-16-1-3p	hsa-miR-16-1-3p
34	hsa-miR-16-2-3p	37.9975	30.289	0.168862	105.3	39.2914	0.0422833	19.5435	16.412	0.475069	64.6635	19.902	0.00188056	45.6696	34.762	0.20667	24.7677	23.2388	0.135444	23.7115	44.1767	0.214145	19.3637	17.9505	0.462619	CCAAUAUUACUGUGCUGCUUUA	experimental		mature miRNA	standard	MIMAT0004518	hsa-miR-16-2-3p	hsa-miR-16-2-3p
35	hsa-miR-16-5p	10108.3	436.267	6.62881e-85	11360.7	737.129	1.74466e-52	9173.16	340.704	2.10772e-166	8478.56	167.914	0	13120.7	388.306	1.42966e-256	9728.42	313.977	7.74187e-216	11129.8	414.826	2.57492e-31	11165.1	660.079	7.96616e-61	UAGCAGCACGUAAAUAUUGGCG	experimental		mature miRNA	standard	MIMAT0000069	hsa-miR-16-5p	hsa-miR-16-5p
36	hsa-miR-17-3p	36.5777	18.9895	0.0154803	52.6466	18.5849	0.0970672	34.7604	18.2031	0.195214	67.8689	14.9794	9.53801e-06	45.6833	30.0437	0.138545	24.7724	22.7314	0.133941	50.5464	47.5545	0.0416087	21.0272	15.6451	0.38139	ACUGCAGUGAAGGCACUUGUAG	experimental		mature miRNA	standard	MIMAT0000071	hsa-miR-17-3p	hsa-miR-17-3p
37	hsa-miR-17-5p	403.275	65.3458	4.17142e-10	444.893	58.7889	2.51273e-12	467.911	50.1072	1.05785e-16	785.229	51.9923	8.57363e-51	547.939	96.2888	2.79758e-08	560.504	69.2924	1.44222e-18	962.396	97.3849	3.81161e-15	805.176	116.016	2.01092e-09	CAAAGUGCUUACAGUGCAGGUAG	experimental		mature miRNA	standard	MIMAT0000070	hsa-miR-17-5p	hsa-miR-17-5p
38	hsa-miR-18a-3p	1.37534	11.0287	1	0.829577	9.08003	1	5.53904	16.7769	0.805729	10.3733	9.1881	0.474422	1.7626	30.3281	0.947266	8.82358	20.3786	0.585779	8.68613	38.954	0.366843	17.7194	27.0521	0.702125	ACUGCCCUAAGUGCUCCUUCUGG	experimental		mature miRNA	standard	MIMAT0002891	hsa-miR-18a-3p	hsa-miR-18a-3p
39	hsa-miR-18a-5p	12.0731	14.0515	0.317885	11.509	10.7859	0.591222	11.3195	16.0489	0.662433	34.4734	13.7611	0.0194147	19.3293	29.6834	0.487371	32.8443	24.7623	0.0742772	34.6293	47.7736	0.142332	36.7612	15.9828	0.131467	UAAGGUGCAUCUAGUGCAGAUAG	experimental		mature miRNA	standard	MIMAT0000072	hsa-miR-18a-5p	hsa-miR-18a-5p
40	hsa-miR-18b-3p	0.0791414	4.65588	1	0.00702225	5.47435	1	7.50324	14.2667	0.631205	0.0402779	2.47897	1	1.20494	15.1167	0.777588	0.0132643	8.2009	1	1.54565	16.5465	0.144803	0.0157599	6.07597	1	UGCCCUAAAUGCCCCUUCUGGC	experimental		mature miRNA	standard	MIMAT0004751	hsa-miR-18b-3p	hsa-miR-18b-3p
41	hsa-miR-18b-5p	4.46977	6.50979	0.508419	545.077	36.3002	2.48887e-41	18.2528	5.24457	0.0279776	16.7563	4.34848	0.00066715	14.698	10.2531	0.107495	15.6205	10.4758	0.019914	31.5297	19.6479	3.24909e-05	13.9309	6.35488	0.108073	UAAGGUGCAUCUAGUGCAGUUAG	experimental		mature miRNA	standard	MIMAT0001412	hsa-miR-18b-5p	hsa-miR-18b-5p
42	hsa-miR-19a-3p	24.4313	15.1874	0.024253	19.5323	24.4503	0.643467	35.3665	18.7444	0.160084	83.181	17.1063	8.67025e-07	47.2605	30.9238	0.13831	93.8602	30.237	6.23831e-05	110.916	51.5352	0.00802033	82.4563	27.8078	0.0388492	UGUGCAAAUCUAUGCAAAACUGA	experimental		mature miRNA	standard	MIMAT0000073	hsa-miR-19a-3p	hsa-miR-19a-3p
43	hsa-miR-19a-5p	1.6136	10.3767	1	1.77859	9.84933	1	3.3708	12.0487	0.898117	3.90013	7.46458	1	2.44146	24.677	0.858017	3.74185	19.2862	0.944578	0.00324824	39.8418	1	6.23096	15.8194	0.836409	AGUUUUGCAUAGUUGCACUACA	experimental		mature miRNA	standard	MIMAT0004490	hsa-miR-19a-5p	hsa-miR-19a-5p
44	hsa-miR-19b-1-5p	0.11305	4.97551	1	0.00835969	4.28923	1	0.00992512	5.12615	1	0.0621339	2.48618	1	0.00113497	21.0496	1	0.0161842	13.8228	1	0.505439	13.9931	0.469077	0.0195593	14.4631	1	AGUUUUGCAGGUUUGCAUCCAGC	experimental		mature miRNA	standard	MIMAT0004491	hsa-miR-19b-1-5p	hsa-miR-19b-1-5p
45	hsa-miR-19b-2-5p	0.109057	5.64174	1	0.00931447	4.68886	1	0.0105522	7.3476	1	0.0630425	1.84658	1	0.0233983	16.9071	0.993449	0.0171301	11.341	1	0.0140443	13.8387	0.971239	0.0182563	6.44305	1	AGUUUUGCAGGUUUGCAUUUCA	experimental		mature miRNA	standard	MIMAT0004492	hsa-miR-19b-2-5p	hsa-miR-19b-2-5p
46	hsa-miR-19b-3p	77.5708	22.4237	1.82494e-06	411.989	51.5166	2.01047e-14	367.374	20.7307	3.29314e-57	803.611	38.5518	6.70802e-98	489.075	73.9167	1.24266e-10	388.531	59.4786	2.80124e-13	918.624	45.5751	4.07273e-102	809.009	59.7682	1.30364e-30	UGUGCAAAUCCAUGCAAAACUGA	experimental		mature miRNA	standard	MIMAT0000074	hsa-miR-19b-3p	hsa-miR-19b-3p
47	hsa-miR-20a-3p	24.7078	17.261	0.115051	31.626	21.9537	0.363582	26.0978	15.1136	0.276014	44.3289	13.7059	0.00360846	25.2354	35.4088	0.465337	26.3291	19.7018	0.059934	20.1296	43.5916	0.353296	12.0295	14.2128	0.58073	ACUGCAUUAUGAGCACUUAAAG	experimental		mature miRNA	standard	MIMAT0004493	hsa-miR-20a-3p	hsa-miR-20a-3p
48	hsa-miR-20a-5p	399.791	94.6895	2.23852e-05	418.672	52.4092	9.4439e-14	560.507	70.7497	3.20144e-13	905.365	68.5874	1.51118e-36	588.083	111.246	2.10848e-07	621.427	66.8545	7.03107e-25	898.462	171.605	0.000162745	811.278	97.6691	1.55014e-11	UAAAGUGCUUAUAGUGCAGGUAG	experimental		mature miRNA	standard	MIMAT0000075	hsa-miR-20a-5p	hsa-miR-20a-5p
49	hsa-miR-20b-3p	0.0620304	5.87673	1	0.0184713	5.26579	1	0.983258	8.66697	0.935886	0.0655629	3.92859	1	0.00184947	11.0725	1	2.06433	7.71578	0.880378	0.000198643	21.6111	1	36.6269	27.4826	0.469786	ACUGUAGUAUGGGCACUUCCAG	experimental		mature miRNA	standard	MIMAT0004752	hsa-miR-20b-3p	hsa-miR-20b-3p
50	hsa-miR-20b-5p	64.1253	17.4508	1.95483e-07	101.948	14.0843	2.56796e-07	202.544	56.9567	0.00258658	344.462	32.8712	2.28368e-26	163.97	53.8534	0.00538352	306.424	39.338	2.75698e-19	177.207	24.4714	1.41087e-22	266.782	36.7148	3.04504e-08	CAAAGUGCUCAUAGUGCAGGUAG	experimental		mature miRNA	standard	MIMAT0001413	hsa-miR-20b-5p	hsa-miR-20b-5p
51	hsa-miR-21-3p	5.39818	10.5893	0.633364	0.977761	8.87961	1	16.9597	21.2385	0.576409	24.8981	10.7031	0.0566348	14.0551	29.319	0.567976	19.6618	20.8599	0.191765	18.3741	45.4631	0.403147	28.4519	15.6244	0.275893	CAACACCAGUCGAUGGGCUGU	experimental		mature miRNA	standard	MIMAT0004494	hsa-miR-21-3p	hsa-miR-21-3p
52	hsa-miR-21-5p	5072.61	2012.54	0.0132253	4620.97	287.091	1.23053e-53	4896.53	408.343	6.68891e-32	11414.4	317.05	3.03639e-197	7664.34	669.264	3.74078e-30	11261	632.531	3.15178e-68	11635.7	4156.56	0.00615331	9214.66	445.673	1.75685e-86	UAGCUUAUCAGACUGAUGUUGA	experimental		mature miRNA	standard	MIMAT0000076	hsa-miR-21-5p	hsa-miR-21-5p
53	hsa-miR-22-3p	419.126	52.4489	1.1204e-16	701.4	93.1404	1.36445e-12	325.251	47.5678	1.13225e-09	524.576	37.7642	5.65367e-44	1011.28	132.388	4.46626e-14	377.16	56.9711	3.44824e-14	659.333	72.9339	3.44226e-22	191.399	55.0435	0.00831604	AAGCUGCCAGUUGAAGAACUGU	experimental		mature miRNA	standard	MIMAT0000077	hsa-miR-22-3p	hsa-miR-22-3p
54	hsa-miR-22-5p	25.8016	16.0197	0.0470751	50.9126	23.1853	0.157881	15.8247	15.4615	0.514171	47.1997	15.6275	0.00534744	63.4434	59.4158	0.30246	22.1475	23.6981	0.224461	16.3851	46.7366	0.582267	23.6228	25.5851	0.483281	AGUUCUUCAGUGGCAAGCUUUA	experimental		mature miRNA	standard	MIMAT0004495	hsa-miR-22-5p	hsa-miR-22-5p
55	hsa-miR-23a-3p	4714.2	923.311	6.69502e-07	4945.11	341.753	2.94062e-45	3322.84	234.118	2.02867e-44	4739.41	276.043	1.46507e-55	3273.94	298.437	8.49226e-28	3713.06	243.775	9.75588e-48	3325.3	150.868	6.34959e-118	2654.86	211.371	4.30437e-28	AUCACAUUGCCAGGGAUUUCC	experimental		mature miRNA	standard	MIMAT0000078	hsa-miR-23a-3p	hsa-miR-23a-3p
56	hsa-miR-23a-5p	13.0307	18.3331	0.445848	34.7599	21.4496	0.319959	2.64568	11.7162	0.885577	9.71292	9.07229	0.442631	11.7589	26.1843	0.596226	11.3564	20.3155	0.452389	6.53742	42.8306	0.801788	18.6121	28.5464	0.653941	GGGGUUCCUGGGGAUGGGAUUU	experimental		mature miRNA	standard	MIMAT0004496	hsa-miR-23a-5p	hsa-miR-23a-5p
57	hsa-miR-23b-3p	2647.39	337.397	1.90191e-15	4292.21	115.885	1.11599e-301	3308.9	260.324	3.99666e-36	4494.91	155.659	7.06768e-184	3037.13	180.171	5.8369e-65	3461.79	179.096	3.6694e-85	3140.65	60.2906	0	2854.35	268.473	7.4398e-23	AUCACAUUGCCAGGGAUUACC	experimental		mature miRNA	standard	MIMAT0000418	hsa-miR-23b-3p	hsa-miR-23b-3p
58	hsa-miR-23b-5p	0.083803	5.69775	1	1.51262	2.62846	0.538221	0.00888906	3.98839	1	0.0365634	2.82492	1	5.89699	14.7076	0.266515	0.0661018	5.98524	0.991359	7.11887	14.6031	9.58274e-05	0.0116547	7.76344	1	UGGGUUCCUGGCAUGCUGAUUU	experimental		mature miRNA	standard	MIMAT0004587	hsa-miR-23b-5p	hsa-miR-23b-5p
59	hsa-miR-23c	165.72	16.5072	1.16394e-33	199.644	27.5408	1.14136e-08	114.152	22.6579	0.000174423	114.414	15.9131	4.3129e-13	39.3219	24.7724	0.148851	129.864	22.1154	2.39993e-13	65.0237	28.5591	7.11807e-05	78.4893	16.5863	0.0017372	AUCACAUUGCCAGUGAUUACCC	experimental		mature miRNA	standard	MIMAT0018000	hsa-miR-23c	hsa-miR-23c
60	hsa-miR-24-1-5p	0.922248	10.6116	1	0.0123769	9.02493	1	1.45467	13.0264	1	6.0168	9.76088	0.766574	2.64023	24.9597	0.816493	2.7817	17.5285	0.969253	1.52451	42.5057	0.937733	5.41164	13.315	0.899627	UGCCUACUGAGCUGAUAUCAGU	experimental		mature miRNA	standard	MIMAT0000079	hsa-miR-24-1-5p	hsa-miR-24-1-5p
61	hsa-miR-24-2-5p	21.4706	18.1041	0.157298	27.7717	27.0099	0.495593	7.86082	12.9897	0.723412	17.3822	11.4394	0.182141	27.0904	39.1016	0.493356	26.0363	22.7098	0.121263	23.7274	52.7776	0.237023	18.5268	29.1107	0.63281	UGCCUACUGAGCUGAAACACAG	experimental		mature miRNA	standard	MIMAT0004497	hsa-miR-24-2-5p	hsa-miR-24-2-5p
62	hsa-miR-24-3p	2821.73	88.7028	2.17199e-227	4403.99	123.101	2.2845e-281	2792.85	100.117	4.13804e-166	2898.52	63.582	0	4601.62	306.146	8.3156e-52	3433.82	216.465	5.532e-58	3658.7	74.2935	0	1917.8	207.257	9.28607e-17	UGGCUCAGUUCAGCAGGAACAG	experimental		mature miRNA	standard	MIMAT0000080	hsa-miR-24-3p	hsa-miR-24-3p
63	hsa-miR-25-3p	1228.45	306.435	0.000102146	1590.32	198.494	7.4464e-15	2278.47	138.706	2.91968e-54	2549.05	127.562	6.61384e-87	1834.44	246.547	1.26803e-13	2428.95	245.273	1.29196e-24	2790.66	343.848	7.14738e-24	5018.68	366.071	3.06011e-36	CAUUGCACUUGUCUCGGUCUGA	experimental		mature miRNA	standard	MIMAT0000081	hsa-miR-25-3p	hsa-miR-25-3p
64	hsa-miR-25-5p	12.4485	21.1879	0.580927	17.2461	17.3102	0.558715	4.58972	14.35	0.956833	12.0613	9.83505	0.392983	1.44455	20.8057	1	8.58496	20.619	0.587781	15.0099	53.4587	0.40584	9.32751	15.1888	0.665644	AGGCGGAGACUUGGGCAAUUG	experimental		mature miRNA	standard	MIMAT0004498	hsa-miR-25-5p	hsa-miR-25-5p
65	hsa-miR-26a-1-3p	2.44545	10.7867	0.959039	0.932503	9.78202	1	2.87654	12.7932	1	3.1717	7.76346	0.835658	4.22153	25.6453	0.81708	0.962109	14.7036	1	1.63308	41.481	0.755713	1.46025	11.8856	1	CCUAUUCUUGGUUACUUGCACG	experimental		mature miRNA	standard	MIMAT0004499	hsa-miR-26a-1-3p	hsa-miR-26a-1-3p
66	hsa-miR-26a-2-3p	16.9016	16.442	0.32122	33.2106	18.4575	0.290171	10.1677	21.9084	0.858941	22.6781	10.1792	0.0751857	5.4148	27.9645	0.827334	6.31344	17.2916	0.711776	3.63429	37.8939	0.793893	3.4458	14.1289	1	CCUAUUCUUGAUUACUUGUUUC	experimental		mature miRNA	standard	MIMAT0004681	hsa-miR-26a-2-3p	hsa-miR-26a-2-3p
67	hsa-miR-26a-5p	20874.1	5421.52	0.000143317	20293.9	456.806	0	22152.5	1257.29	1.81406e-73	18389.7	392.408	0	16281.9	551.731	7.72867e-170	20862.6	605.093	2.99769e-230	23494.5	730.206	2.75716e-110	12791.1	736.715	7.11679e-59	UUCAAGUAAUCCAGGAUAGGCU	experimental		mature miRNA	standard	MIMAT0000082	hsa-miR-26a-5p	hsa-miR-26a-5p
68	hsa-miR-26b-3p	19.834	5.83944	0.153274	21.4899	12.441	0.199208	0.013561	7.16343	1	2.61884	2.71816	0.751428	0.0017613	13.7706	1	0.0155463	16.978	1	5.52921	13.1106	0.00219337	0.0186447	8.7968	1	CCUGUUCUCCAUUACUUGGCUC	experimental		mature miRNA	standard	MIMAT0004500	hsa-miR-26b-3p	hsa-miR-26b-3p
69	hsa-miR-26b-5p	3818.2	137.191	3.4913e-173	6377.06	188.088	4.304e-253	7009.4	204.026	9.80315e-256	9102.27	228.644	0	6844.25	184.85	3.46722e-305	7893.87	530.428	1.59229e-50	5342.87	175.323	8.56792e-204	5684.57	279.679	4.79214e-85	UUCAAGUAAUUCAGGAUAGGU	experimental		mature miRNA	standard	MIMAT0000083	hsa-miR-26b-5p	hsa-miR-26b-5p
70	hsa-miR-27a-3p	1239.14	381.766	0.0010836	1609.52	150.668	1.46691e-22	735.959	84.7518	1.30627e-17	1136.57	62.1093	1.81821e-75	1950.86	186.459	4.49594e-28	1269.83	132.802	4.6344e-23	1894.63	122.535	1.79073e-44	707.771	86.4076	1.75654e-10	UUCACAGUGGCUAAGUUCCGC	experimental		mature miRNA	standard	MIMAT0000084	hsa-miR-27a-3p	hsa-miR-27a-3p
71	hsa-miR-27a-5p	2.91431	13.1122	0.970307	5.55647	21.4968	0.912216	1.15609	12.0494	1	1.65924	6.94007	1	3.6495	29.8772	0.83967	5.18115	18.3902	0.773075	4.37184	40.569	0.620253	1.1718	11.9562	1	AGGGCUUAGCUGCUUGUGAGCA	experimental		mature miRNA	standard	MIMAT0004501	hsa-miR-27a-5p	hsa-miR-27a-5p
72	hsa-miR-27b-3p	85.2039	9.85683	1.6067e-31	392.605	49.4844	2.21268e-13	321.561	39.8867	8.82388e-13	496.142	30.6216	2.40597e-60	521.583	66.9199	6.56672e-14	607.68	45.7913	1.9848e-46	338.959	29.0391	6.26553e-43	320.331	42.0333	1.18701e-08	UUCACAGUGGCUAAGUUCUGC	experimental		mature miRNA	standard	MIMAT0000419	hsa-miR-27b-3p	hsa-miR-27b-3p
73	hsa-miR-27b-5p	56.566	55.3448	0.525169	4.65034	4.91989	0.395684	0.0117718	5.20928	1	0.0444942	3.16689	1	3.09792	16.5411	0.6319	0.0147015	7.64436	1	3.17613	12.2443	0.0158415	0.0159138	8.53149	1	AGAGCUUAGCUGAUUGGUGAAC	experimental		mature miRNA	standard	MIMAT0004588	hsa-miR-27b-5p	hsa-miR-27b-5p
74	hsa-miR-28-3p	101.005	35.045	0.001096	347.289	63.7134	6.06643e-06	89.2186	29.1061	0.0284972	118.093	22.0123	7.20592e-08	175.139	52.556	0.00199555	54.3601	28.3289	0.00878949	69.7115	45.8913	0.0188086	28.7028	17.8266	0.261999	CACUAGAUUGUGAGCUCCUGGA	experimental		mature miRNA	standard	MIMAT0004502	hsa-miR-28-3p	hsa-miR-28-3p
75	hsa-miR-28-5p	190.673	48.3897	2.45572e-05	584.634	116.353	5.3262e-06	207.9	42.9057	0.000146071	175.305	48.7266	0.000238099	406.238	90.6332	2.70193e-05	112.405	42.1381	0.000873737	125.354	53.07	0.00277985	37.4161	19.3516	0.208174	AAGGAGCUCACAGUCUAUUGAG	experimental		mature miRNA	standard	MIMAT0000085	hsa-miR-28-5p	hsa-miR-28-5p
76	hsa-miR-29a-3p	9049.65	298.47	6.30078e-92	7176.75	453.657	1.0029e-42	5548.8	340.566	1.12185e-62	9580.78	225.081	0	6642.14	294.291	3.19028e-127	9347.97	629.9	2.7063e-48	10873.2	467.904	7.95678e-85	6901.14	372.085	1.97091e-67	UAGCACCAUCUGAAAUCGGUUA	experimental		mature miRNA	standard	MIMAT0000086	hsa-miR-29a-3p	hsa-miR-29a-3p
77	hsa-miR-29a-5p	10.515	14.8705	0.514251	7.94799	14.1853	0.812303	10.4202	17.9602	0.717341	24.5144	11.4877	0.0771871	23.8622	29.3252	0.379361	26.6316	21.6916	0.0986588	7.43076	42.0194	0.607471	5.89454	15.4564	0.789943	ACUGAUUUCUUUUGGUGUUCAG	experimental		mature miRNA	standard	MIMAT0004503	hsa-miR-29a-5p	hsa-miR-29a-5p
78	hsa-miR-29b-1-5p	32.8036	16.7684	0.00835196	38.3307	11.3408	0.05752	10.8008	7.61926	0.3908	59.0864	8.73146	6.6195e-11	30.7572	16.9034	0.0720706	73.2566	16.1899	2.54232e-09	48.7095	16.9926	5.85335e-10	29.3932	7.57666	0.0131703	GCUGGUUUCAUAUGGUGGUUUAGA	experimental		mature miRNA	standard	MIMAT0004514	hsa-miR-29b-1-5p	hsa-miR-29b-1-5p
79	hsa-miR-29b-2-5p	16.155	7.26184	0.154815	5.15427	3.19562	0.297037	0.014223	6.65755	1	19.608	6.99909	0.0835554	12.3933	17.2932	0.277011	13.0855	11.8126	0.212816	2.74782	12.95	0.168186	0.0178463	9.67816	1	CUGGUUUCACAUGGUGGCUUAG	experimental		mature miRNA	standard	MIMAT0004515	hsa-miR-29b-2-5p	hsa-miR-29b-2-5p
80	hsa-miR-29b-3p	3124.92	82.0563	0	3939.5	138.698	6.78832e-179	7259.38	500.354	3.58164e-47	8657.49	148.582	0	12294.5	249.031	0	19233.4	549.681	3.79729e-269	17749.2	230.909	0	10559	231.812	0	UAGCACCAUUUGAAAUCAGUGUU	experimental		mature miRNA	standard	MIMAT0000100	hsa-miR-29b-3p	hsa-miR-29b-3p
81	hsa-miR-29c-3p	704.634	55.2876	6.61795e-41	1357.14	89.4314	5.13183e-52	1580.63	90.9029	6.1654e-64	3095.58	77.2209	0	2291.77	143.989	3.13262e-58	3894.78	110.012	6.79052e-281	1791.86	102.463	5.8786e-71	2955.66	143.684	9.00732e-83	UAGCACCAUUUGAAAUCGGUUA	experimental		mature miRNA	standard	MIMAT0000681	hsa-miR-29c-3p	hsa-miR-29c-3p
82	hsa-miR-29c-5p	19.9665	12.7162	0.045268	179.197	30.6129	6.22198e-06	33.461	13.1223	0.109279	88.7618	18.0797	1.53532e-06	54.7376	26.0377	0.0425492	36.1528	21.8279	0.0210285	24.3139	23.7603	0.00973428	6.91802	9.56423	0.633935	UGACCGAUUUCUCCUGGUGUUC	experimental		mature miRNA	standard	MIMAT0004673	hsa-miR-29c-5p	hsa-miR-29c-5p
83	hsa-miR-30a-3p	3.04653	12.1187	1	0.104873	9.78114	1	12.0556	17.6538	0.66274	7.67085	8.95565	0.597549	7.56701	31.7732	0.937495	9.52254	19.6192	0.538775	0.990111	38.0037	0.960407	16.1153	19.743	0.581903	CUUUCAGUCGGAUGUUUGCAGC	experimental		mature miRNA	standard	MIMAT0000088	hsa-miR-30a-3p	hsa-miR-30a-3p
84	hsa-miR-30a-5p	1530.01	370.357	5.26551e-05	2394.04	217.192	1.49597e-23	2253	160.746	1.47585e-43	1909.6	72.4234	9.28977e-136	3812.17	257.01	6.33886e-58	1844.71	111.426	1.17328e-65	1356	82.9002	3.68852e-19	1316	135.691	3.38792e-17	UGUAAACAUCCUCGACUGGAAG	experimental		mature miRNA	standard	MIMAT0000087	hsa-miR-30a-5p	hsa-miR-30a-5p
85	hsa-miR-30b-3p	18.2166	7.50371	0.00239901	35.5436	8.26975	0.0159091	20.1276	8.10079	0.121497	43.0548	8.47904	2.66682e-06	33.1552	34.309	0.333231	28.7817	12.7509	0.00148292	21.8083	13.0981	2.3458e-06	11.1442	8.32534	0.391515	CUGGGAGGUGGAUGUUUACUUC	experimental		mature miRNA	standard	MIMAT0004589	hsa-miR-30b-3p	hsa-miR-30b-3p
86	hsa-miR-30b-5p	5695.39	315.648	1.68856e-73	13198.2	274.924	0	14680.4	504.914	6.95503e-185	12021.2	138.146	0	10123.5	359.512	5.27067e-177	9238.78	289.885	2.16458e-224	8526.89	241.1	7.61635e-272	7552.53	567.1	2.80148e-38	UGUAAACAUCCUACACUCAGCU	experimental		mature miRNA	standard	MIMAT0000420	hsa-miR-30b-5p	hsa-miR-30b-5p
87	hsa-miR-30c-1-3p	560.094	255.746	0.0189162	30.9005	15.16	0.205812	3525.21	209.943	5.493e-62	2408.23	114.398	3.98773e-99	30.965	30.0857	0.350816	2326.57	113.45	8.77244e-98	3011.97	89.7713	3.009e-257	869.629	72.7382	2.05896e-26	CUGGGAGAGGGUUGUUUACUCC	experimental		mature miRNA	standard	MIMAT0004674	hsa-miR-30c-1-3p	hsa-miR-30c-1-3p
88	hsa-miR-30c-2-3p	4.86503	6.16256	0.471314	31.2398	17.309	0.354396	21.1908	8.47328	0.12814	28.2885	6.04135	0.00014739	1.40081	27.4186	0.939123	38.6953	23.7742	0.0315638	3.3069	13.6044	0.258061	11.2336	8.28511	0.404059	CUGGGAGAAGGCUGUUUACUCU	experimental		mature miRNA	standard	MIMAT0004550	hsa-miR-30c-2-3p	hsa-miR-30c-2-3p
89	hsa-miR-30c-5p	2956.58	231.532	4.12855e-38	6690.22	651.567	7.94685e-25	6860.81	281.65	1.61438e-129	6523.72	63.9403	0	6103.52	279.858	3.18851e-107	5541.99	140.116	0	3909.33	175.948	6.31738e-110	5079.33	257.27	2.24209e-79	UGUAAACAUCCUACACUCUCAGC	experimental		mature miRNA	standard	MIMAT0000244	hsa-miR-30c-5p	hsa-miR-30c-5p
90	hsa-miR-30d-3p	1.23713	8.06174	0.970356	0.00942019	4.76822	1	0.00987779	8.72232	1	0.0475504	2.33881	1	2.98377	12.126	0.504134	0.0141239	11.3136	1	1.21608	11.4797	0.121736	0.922062	8.07449	0.945863	CUUUCAGUCAGAUGUUUGCUGC	experimental		mature miRNA	standard	MIMAT0004551	hsa-miR-30d-3p	hsa-miR-30d-3p
91	hsa-miR-30d-5p	1382.11	73.1375	6.25011e-84	273.027	43.7236	1.23692e-08	1863.85	113.217	4.47816e-58	1374.69	34.545	0	1761.05	146.101	5.15063e-34	610.486	63.4549	4.35399e-25	627.613	39.0648	4.47191e-68	554.446	74.1931	1.96784e-09	UGUAAACAUCCCCGACUGGAAG	experimental		mature miRNA	standard	MIMAT0000245	hsa-miR-30d-5p	hsa-miR-30d-5p
92	hsa-miR-30e-3p	70.7638	35.987	0.0079057	325.059	29.3572	5.19981e-22	108.987	22.2967	0.000278062	176.308	15.1517	4.59291e-32	299.792	85.866	0.00127134	84.0899	30.1387	0.000226506	84.0598	22.9336	5.59961e-09	38.9955	11.7847	0.0336253	CUUUCAGUCGGAUGUUUACAGC	experimental		mature miRNA	standard	MIMAT0000693	hsa-miR-30e-3p	hsa-miR-30e-3p
93	hsa-miR-30e-5p	1465.77	76.6922	2.70809e-85	3903.31	169.808	3.12139e-117	2726.54	156.598	1.16233e-65	2555.67	66.8852	0	5935.94	220.996	9.19658e-161	2226.77	137.339	2.27231e-61	2269.66	104.825	1.73272e-106	1800.01	158.224	2.66496e-24	UGUAAACAUCCUUGACUGGAAG	experimental		mature miRNA	standard	MIMAT0000692	hsa-miR-30e-5p	hsa-miR-30e-5p
94	hsa-miR-31-3p	12.4027	14.263	0.517832	8.81112	13.6021	0.675935	16.5803	22.0623	0.62695	11.1146	10.0355	0.41506	9.41722	29.5276	0.639745	5.73701	18.1402	0.692219	8.62559	49.5224	0.638672	0.106816	12.5713	1	UGCUAUGCCAACAUAUUGCCAU	experimental		mature miRNA	standard	MIMAT0004504	hsa-miR-31-3p	hsa-miR-31-3p
95	hsa-miR-31-5p	501.759	141.197	0.000530861	1096.55	89.9112	1.013e-26	585.03	83.5215	1.49556e-10	528.897	54.5052	1.89194e-20	989.233	125.503	2.73394e-14	303.218	45.4801	1.52803e-14	422.691	73.7481	3.30831e-07	259.779	38.0182	1.36093e-05	AGGCAAGAUGCUGGCAUAGCU	experimental		mature miRNA	standard	MIMAT0000089	hsa-miR-31-5p	hsa-miR-31-5p
96	hsa-miR-32-3p	29.9455	19.7641	0.062769	48.0215	19.4938	0.162279	38.5621	18.7818	0.166023	67.8305	21.6268	0.00240928	105.326	43.0511	0.0211086	64.1019	27.6348	0.0036949	18.2428	41.4796	0.361333	59.3179	41.2099	0.2851	CAAUUUAGUGUGUGUGAUAUUU	experimental		mature miRNA	standard	MIMAT0004505	hsa-miR-32-3p	hsa-miR-32-3p
97	hsa-miR-32-5p	90.707	34.1763	0.0050436	170.062	60.3171	0.0230744	249.704	42.3148	7.92142e-07	224.459	31.974	6.78544e-12	378.962	76.3035	4.6465e-06	201.621	40.9716	6.66074e-10	99.6187	50.9738	0.0172286	85.5474	32.3976	0.0638874	UAUUGCACAUUACUAAGUUGCA	experimental		mature miRNA	standard	MIMAT0000090	hsa-miR-32-5p	hsa-miR-32-5p
98	hsa-miR-33a-3p	10.4854	13.9441	0.533095	1.26168	10.15	1	22.1329	30.2279	0.604431	12.153	11.8611	0.492222	2.80878	29.256	0.966571	13.3038	19.4256	0.415623	1.64205	39.5775	0.947258	6.16244	14.1763	0.862072	CAAUGUUUCCACAGUGCAUCAC	experimental		mature miRNA	standard	MIMAT0004506	hsa-miR-33a-3p	hsa-miR-33a-3p
99	hsa-miR-33a-5p	2.02275	11.2679	1	0.0136174	8.89075	1	8.10117	12.8493	0.638132	1.58704	6.65045	1	2.00487	25.3025	0.956821	9.80999	19.2917	0.518348	0.19726	41.9527	1	5.03687	15.0407	0.930955	GUGCAUUGUAGUUGCAUUGCA	experimental		mature miRNA	standard	MIMAT0000091	hsa-miR-33a-5p	hsa-miR-33a-5p
100	hsa-miR-33b-3p	0.0933588	4.65202	1	0.0111196	4.00102	1	35.4574	47.7508	0.601141	0.0666556	2.93306	1	0.00134033	15.1061	1	0.0195346	13.9942	1	0.000167786	14.2171	1	0.0210904	6.95668	1	CAGUGCCUCGGCAGUGCAGCCC	experimental		mature miRNA	standard	MIMAT0004811	hsa-miR-33b-3p	hsa-miR-33b-3p
101	hsa-miR-33b-5p	0.0665484	5.26731	1	333.798	54.2682	7.81737e-07	1.84681	6.87447	0.853773	0.0491011	2.4117	1	0.00183484	14.2761	1	0.0142088	6.78751	1	0.000251447	15.9128	1	10.0219	28.7367	0.779211	GUGCAUUGCUGUUGCAUUGC	experimental		mature miRNA	standard	MIMAT0003301	hsa-miR-33b-5p	hsa-miR-33b-5p
102	hsa-miR-34a-3p	0.040205	10.2795	1	1.01651	9.07324	1	7.42516	10.4013	0.595684	4.59173	7.74997	0.706263	5.59869	26.1943	0.711606	11.618	17.7267	0.388443	1.03716	43.8379	1	11.1685	15.3706	0.589111	CAAUCAGCAAGUAUACUGCCCU	experimental		mature miRNA	standard	MIMAT0004557	hsa-miR-34a-3p	hsa-miR-34a-3p
103	hsa-miR-34a-5p	2.25863	11.1105	0.930562	0.676167	10.7676	1	15.4259	17.9184	0.538331	20.737	12.5406	0.173569	30.3538	46.9053	0.507596	22.0409	19.3316	0.154504	1.90858	40.6768	1	21.4579	17.6327	0.477294	UGGCAGUGUCUUAGCUGGUUGU	experimental		mature miRNA	standard	MIMAT0000255	hsa-miR-34a-5p	hsa-miR-34a-5p
104	hsa-miR-34b-3p	0.0344712	5.10399	1	241.365	34.6136	3.87615e-09	10.2266	6.18931	0.175098	1.05065	3.30655	0.823887	7.71213	20.5743	0.560031	3.08922	12.8249	0.670727	24.0306	15.2638	2.18313e-07	36.2967	52.8795	0.518919	CAAUCACUAACUCCACUGCCAU	experimental		mature miRNA	standard	MIMAT0004676	hsa-miR-34b-3p	hsa-miR-34b-3p
105	hsa-miR-34b-5p	0.0526669	4.00917	1	0.0181481	3.58837	1	72.2083	78.4354	0.494084	0.0591493	3.33127	1	0.00197562	15.0814	1	16.1902	7.503	0.0397762	0.000240438	17.9027	1	18.4363	8.88442	0.310881	UAGGCAGUGUCAUUAGCUGAUUG	experimental		mature miRNA	standard	MIMAT0000685	hsa-miR-34b-5p	hsa-miR-34b-5p
106	hsa-miR-34c-3p	9.09285	5.86447	0.125171	19.8929	9.81257	0.452974	16.5793	9.42404	0.366795	8.53415	5.10599	0.390654	13.867	16.216	0.352245	21.1552	10.134	0.0241474	0.000480096	15.7157	1	32.4545	8.65445	0.016399	AAUCACUAACCACACGGCCAGG	experimental		mature miRNA	standard	MIMAT0004677	hsa-miR-34c-3p	hsa-miR-34c-3p
107	hsa-miR-34c-5p	0.0553285	4.70117	1	0.0174667	2.46434	1	51.582	68.4229	0.592652	0.060328	1.45682	1	0.00191613	13.8469	1	20.5551	6.3612	0.00210487	0.000237542	12.8465	1	7.36281	4.61547	0.454973	AGGCAGUGUAGUUAGCUGAUUGC	experimental		mature miRNA	standard	MIMAT0000686	hsa-miR-34c-5p	hsa-miR-34c-5p
108	hsa-miR-92a-1-5p	21.2434	21.69	0.21633	16.6356	17.1343	0.571213	25.147	20.9759	0.39085	35.0935	13.1878	0.0173375	13.2625	30.0422	0.655226	33.996	24.3677	0.0493154	24.063	50.0298	0.502086	30.2679	19.1552	0.295337	AGGUUGGGAUCGGUUGCAAUGCU	experimental		mature miRNA	standard	MIMAT0004507	hsa-miR-92a-1-5p	hsa-miR-92a-1-5p
109	hsa-miR-92a-2-5p	5.95898	15.8731	0.808874	0.472514	8.74461	1	2.63056	12.5235	1	2.7157	8.36044	0.983764	8.15475	27.9559	0.771274	14.2713	15.6977	0.273185	0.565946	41.7583	1	6.97562	14.8037	0.833067	GGGUGGGGAUUUGUUGCAUUAC	experimental		mature miRNA	standard	MIMAT0004508	hsa-miR-92a-2-5p	hsa-miR-92a-2-5p
110	hsa-miR-92a-3p	4865.9	759.002	7.64149e-09	5267.96	365.628	1.30414e-31	2934.6	515.763	7.02166e-08	3816.52	215.031	5.34707e-59	2689.14	433.195	2.84817e-09	3044.34	161.86	4.06418e-82	4915.99	1283.64	0.00384652	4587.77	396.067	5.3868e-27	UAUUGCACUUGUCCCGGCCUGU	experimental		mature miRNA	standard	MIMAT0000092	hsa-miR-92a-3p	hsa-miR-92a-3p
111	hsa-miR-92b-3p	3680.94	162.008	1.97024e-116	4179.6	60.185	0	2276.56	97.5416	7.73395e-116	2317.31	77.09	1.7199e-199	1547.82	140.136	3.46258e-29	1636.09	70.2089	1.81613e-126	3500.22	122.153	1.48419e-183	2178.97	130.179	1.46637e-52	UAUUGCACUCGUCCCGGCCUCC	experimental		mature miRNA	standard	MIMAT0003218	hsa-miR-92b-3p	hsa-miR-92b-3p
112	hsa-miR-92b-5p	0.0552529	5.0263	1	5.49382	3.128	0.142149	0.319572	5.01513	0.945412	0.0280276	2.48764	1	22.6062	15.9646	0.00914028	0.00932274	5.90439	1	19.919	18.5739	1.10654e-07	6.2489	6.05495	0.283458	AGGGACGGGACGCGGUGCAGUG	experimental		mature miRNA	standard	MIMAT0004792	hsa-miR-92b-5p	hsa-miR-92b-5p
113	hsa-miR-93-3p	4.22994	12.0923	0.724965	6.80097	12.0387	0.827307	4.77896	14.3817	0.831617	6.2923	7.86396	0.545205	14.3851	31.6646	0.579304	10.9772	16.7822	0.342116	10.9437	43.2455	0.597646	22.136	23.4693	0.440204	ACUGCUGAGCUAGCACUUCCCG	experimental		mature miRNA	standard	MIMAT0004509	hsa-miR-93-3p	hsa-miR-93-3p
114	hsa-miR-93-5p	218.227	35.0392	2.51946e-10	358.777	84.7634	0.000176999	160.684	38.8158	0.000808547	237.994	26.7381	1.10489e-19	263.027	100.469	0.0166771	178.809	36.7086	3.90747e-10	198.52	100.782	0.0718019	170.917	47.6105	0.00544541	CAAAGUGCUGUUCGUGCAGGUAG	experimental		mature miRNA	standard	MIMAT0000093	hsa-miR-93-5p	hsa-miR-93-5p
115	hsa-miR-95-3p	18.4832	14.5353	0.134716	30.3341	13.5411	0.20805	14.0622	17.1173	0.595713	15.7778	9.94597	0.203572	30.0556	35.7623	0.403639	18.4355	18.2375	0.172346	4.84476	43.2264	0.858157	12.5403	20.5724	0.752397	UUCAACGGGUAUUUAUUGAGCA	experimental		mature miRNA	standard	MIMAT0000094	hsa-miR-95-3p	hsa-miR-95-3p
116	hsa-miR-95-5p	0.0513327	3.81502	1	3.68628	3.68581	0.416477	4.01459	12.9495	0.779509	0.0300727	3.43614	1	6.13646	18.2013	0.462185	4.45027	8.96757	0.468834	5.91719	13.5119	0.00461268	0.342295	5.50147	0.958365	UCAAUAAAUGUCUGUUGAAUU	experimental		mature miRNA	standard	MIMAT0026473	hsa-miR-95-5p	hsa-miR-95-5p
117	hsa-miR-96-3p	0.526101	9.69217	1	1.43073	9.5627	1	1.076	12.2391	1	0.038822	6.06218	1	6.91918	33.0811	0.712441	2.48387	15.4961	0.842937	0.916776	40.7245	1	25.169	62.1021	0.742307	AAUCAUGUGCAGUGCCAAUAUG	experimental		mature miRNA	standard	MIMAT0004510	hsa-miR-96-3p	hsa-miR-96-3p
118	hsa-miR-96-5p	9.85799	23.0691	1	0.25045	8.82683	1	3.02339	12.7468	0.908636	0.570319	5.73831	1	1.18411	25.2266	0.932676	5.12851	19.2669	0.742411	1.17136	43.5746	1	33.0194	68.0257	0.720574	UUUGGCACUAGCACAUUUUUGCU	experimental		mature miRNA	standard	MIMAT0000095	hsa-miR-96-5p	hsa-miR-96-5p
119	hsa-miR-98-3p	12.0884	27.386	0.721186	1.10788	9.0618	1	2.77005	11.7015	1	7.40406	11.8109	0.69408	1.58425	28.543	1	18.9262	19.1567	0.210972	6.43675	41.8157	0.477711	5.43734	15.2979	0.845394	CUAUACAACUUACUACUUUCCC	experimental		mature miRNA	standard	MIMAT0022842	hsa-miR-98-3p	hsa-miR-98-3p
120	hsa-miR-98-5p	173.051	40.6915	2.57149e-06	266.194	60.744	7.93954e-05	327.366	66.0745	1.12068e-05	843.029	45.2157	1.98173e-71	211.937	60.4538	0.00231029	763.992	83.8126	6.62559e-22	190.329	61.8587	9.88115e-05	704.842	101.584	6.11447e-09	UGAGGUAGUAAGUUGUAUUGUU	experimental		mature miRNA	standard	MIMAT0000096	hsa-miR-98-5p	hsa-miR-98-5p
121	hsa-miR-99a-3p	5.28559	12.5921	0.993327	1.56351	8.12251	0.970393	0.437596	10.6747	1	1.56185	7.02518	1	0.00135124	24.3441	1	0.333237	17.918	1	1.37661	41.5599	0.753333	0.566081	12.3046	1	CAAGCUCGCUUCUAUGGGUCUG	experimental		mature miRNA	standard	MIMAT0004511	hsa-miR-99a-3p	hsa-miR-99a-3p
122	hsa-miR-99a-5p	172.93	29.9023	2.55685e-12	405.07	86.0161	1.55539e-05	193.359	52.4481	0.00205264	257.36	42.9002	2.38673e-09	55.2185	45.1867	0.296112	25.5472	25.8089	0.156943	68.0276	51.268	0.025145	17.5368	23.3607	0.57969	AACCCGUAGAUCCGAUCUUGUG	experimental		mature miRNA	standard	MIMAT0000097	hsa-miR-99a-5p	hsa-miR-99a-5p
123	hsa-miR-99b-3p	3.83344	6.36651	0.623212	14.1785	4.79226	0.11668	7.81821	4.74643	0.261006	1.58367	5.45646	0.875596	3.5234	21.2475	0.802368	6.802	4.21591	0.0248991	7.91531	13.1838	0.00632045	52.7268	52.8768	0.465788	CAAGCUCGUGUCUGUGGGUCCG	experimental		mature miRNA	standard	MIMAT0004678	hsa-miR-99b-3p	hsa-miR-99b-3p
124	hsa-miR-99b-5p	105.504	23.9541	2.5505e-08	259.027	35.3773	1.21793e-09	86.7679	11.8188	1.46196e-07	107.118	14.5357	1.53655e-13	49.1734	32.8638	0.160682	44.539	19.7993	0.00182428	84.6259	21.7077	9.93459e-11	33.9082	13.1852	0.104246	CACCCGUAGAACCGACCUUGCG	experimental		mature miRNA	standard	MIMAT0000689	hsa-miR-99b-5p	hsa-miR-99b-5p
125	hsa-miR-100-3p	6.62865	16.949	0.984812	1.38827	9.97303	1	0.0122525	21.4814	1	1.54113	6.94084	1	1.92619	27.7729	1	1.09796	15.6467	0.990044	0.932467	38.5613	0.904264	4.63528	17.2682	0.887211	CAAGCUUGUAUCUAUAGGUAUG	experimental		mature miRNA	standard	MIMAT0004512	hsa-miR-100-3p	hsa-miR-100-3p
126	hsa-miR-100-5p	62.3676	24.0338	0.00172461	135.192	32.5547	0.00252488	326.222	65.3638	1.79872e-05	365.883	79.8451	4.08709e-06	32.6845	29.3675	0.317678	20.3161	21.9804	0.174882	221.503	56.0971	9.07833e-09	53.2522	49.7594	0.433892	AACCCGUAGAUCCGAACUUGUG	experimental		mature miRNA	standard	MIMAT0000098	hsa-miR-100-5p	hsa-miR-100-5p
127	hsa-miR-101-3p	418.831	97.025	8.93085e-06	503.421	63.9073	8.49722e-12	339.201	42.2351	5.5587e-12	401.773	39.0147	2.06901e-25	1048.69	156.338	6.72648e-11	344.255	48.2642	5.65674e-17	474.464	61.0498	5.42027e-15	91.7416	22.5861	0.0168001	UACAGUACUGUGAUAACUGAA	experimental		mature miRNA	standard	MIMAT0000099	hsa-miR-101-3p	hsa-miR-101-3p
128	hsa-miR-101-5p	17.5362	18.3378	0.575172	34.566	52.6388	0.56332	8.68188	19.7875	0.861582	4.60711	9.4816	0.806155	1.15793	26.0227	1	0.0566863	17.7941	1	2.12896	41.2444	0.790715	0.0159338	12.292	1	CAGUUAUCACAGUGCUGAUGCU	experimental		mature miRNA	standard	MIMAT0004513	hsa-miR-101-5p	hsa-miR-101-5p
129	hsa-miR-103a-2-5p	11.4791	14.269	0.646337	3.56137	9.22796	0.853295	2.98493	13.3085	0.896691	8.62308	8.59089	0.644573	1.95185	30.0855	0.919711	3.2583	18.3109	1	2.80369	40.3249	0.727798	4.31095	14.1329	1	AGCUUCUUUACAGUGCUGCCUUG	experimental		mature miRNA	standard	MIMAT0009196	hsa-miR-103a-2-5p	hsa-miR-103a-2-5p
130	hsa-miR-103a-3p	1841.25	98.3661	6.7361e-65	2101.64	155.476	8.30992e-36	994.466	102.47	3.3031e-18	1103.92	63.7631	2.57755e-66	1295.33	241.105	5.36175e-08	1006.65	95.7148	5.92001e-27	1346	108.632	1.52089e-26	626.185	79.9318	5.15543e-09	AGCAGCAUUGUACAGGGCUAUGA	experimental		mature miRNA	standard	MIMAT0000101	hsa-miR-103a-3p	hsa-miR-103a-3p
131	hsa-miR-103b	0.0741115	6.31907	1	0.00989746	4.41951	1	0.0111484	6.02636	1	65.4855	11.4092	1.63014e-05	2.136	46.8742	0.908552	0.200957	8.81307	0.98407	2.18557	16.7483	0.123828	0.0174045	12.3269	1	UCAUAGCCCUGUACAAUGCUGCU	experimental		mature miRNA	standard	MIMAT0007402	hsa-miR-103b	hsa-miR-103b
132	hsa-miR-105-3p	10.1308	17.3841	0.941647	2.44549	9.2687	1	3.92049	13.6213	0.976361	1.12888	6.55951	1	0.205322	24.9182	1	0.249282	15.7394	1	0.318329	39.097	0.974056	2.8364	18.3487	0.979108	ACGGAUGUUUGAGCAUGUGCUA	experimental		mature miRNA	standard	MIMAT0004516	hsa-miR-105-3p	hsa-miR-105-3p
133	hsa-miR-105-5p	9.41811	15.9197	0.972807	0.311594	8.34942	1	2.28704	12.9451	0.997972	0.34835	5.97842	1	1.99713	31.0257	0.983137	2.84528	17.4215	0.946516	0.0649754	39.8021	1	1.30678	14.3131	1	UCAAAUGCUCAGACUCCUGUGGU	experimental		mature miRNA	standard	MIMAT0000102	hsa-miR-105-5p	hsa-miR-105-5p
134	hsa-miR-106a-3p	8.04329	18.524	1	2.12818	12.149	1	6.20066	14.615	0.765418	1.76319	7.72463	1	0.00179217	22.2897	1	2.24453	16.4325	1	0.793739	42.0808	0.909037	6.99322	17.96	0.986012	CUGCAAUGUAAGCACUUCUUAC	experimental		mature miRNA	standard	MIMAT0004517	hsa-miR-106a-3p	hsa-miR-106a-3p
135	hsa-miR-106a-5p	398.436	58.6092	1.32566e-11	424.155	62.5861	1.85944e-09	525.742	58.2013	3.38308e-15	787.64	61.3035	8.64786e-36	503.3	77.4074	1.62016e-09	549.438	56.7942	2.50483e-26	993.632	85.18	9.84821e-22	760.846	78.0638	1.94712e-14	AAAAGUGCUUACAGUGCAGGUAG	experimental		mature miRNA	standard	MIMAT0000103	hsa-miR-106a-5p	hsa-miR-106a-5p
136	hsa-miR-106b-3p	14.6677	8.15417	0.0772686	5.39692	4.62349	0.600436	12.4236	6.50987	0.270724	19.384	5.00449	0.0179403	0.00314599	14.4208	1	22.5275	16.1336	0.0905657	13.2284	13.9673	0.000311338	35.7849	29.0622	0.52483	CCGCACUGUGGGUACUUGCUGC	experimental		mature miRNA	standard	MIMAT0004672	hsa-miR-106b-3p	hsa-miR-106b-3p
137	hsa-miR-106b-5p	289.953	21.4565	7.47047e-53	363.792	40.3269	3.35193e-16	242.025	31.3362	3.14723e-11	312.094	36.3665	3.49104e-18	373.348	58.8758	2.49516e-09	217.308	26.1186	3.04905e-23	342.3	20.9764	3.67601e-83	160.403	22.1274	5.76376e-07	UAAAGUGCUGACAGUGCAGAU	experimental		mature miRNA	standard	MIMAT0000680	hsa-miR-106b-5p	hsa-miR-106b-5p
138	hsa-miR-107	1752.07	84.8893	9.03854e-71	1903.92	339.736	2.40516e-08	958.784	103.129	1.1482e-15	1099.99	72.4684	3.87298e-48	1333.82	144.327	7.66336e-21	992.347	88.657	3.19447e-33	1241.99	102.044	1.34679e-26	634.357	105.728	5.55714e-07	AGCAGCAUUGUACAGGGCUAUCA	experimental		mature miRNA	standard	MIMAT0000104	hsa-miR-107	hsa-miR-107
139	hsa-miR-122-3p	2.47029	12.2861	1	0.0181044	8.10528	1	2.22959	11.294	1	0.0738963	5.96906	1	0.0128951	29.9497	1	2.18588	15.9477	1	0.0630129	41.9865	1	14.1182	28.751	0.935669	AACGCCAUUAUCACACUAAAUA	experimental		mature miRNA	standard	MIMAT0004590	hsa-miR-122-3p	hsa-miR-122-3p
140	hsa-miR-122-5p	60.558	28.7777	0.0276921	5.02439	10.4103	0.965965	75.5187	31.1329	0.0569449	50.3165	14.9623	0.00500487	10.2209	26.3886	0.683067	19.0014	19.8216	0.21952	4.84329	37.6124	0.716851	12.3844	16.6195	0.640318	UGGAGUGUGACAAUGGUGUUUG	experimental		mature miRNA	standard	MIMAT0000421	hsa-miR-122-5p	hsa-miR-122-5p
141	hsa-miR-124-3p	14.5339	15.8299	0.489448	14.4525	12.1255	0.496306	12.2096	12.7057	0.505234	1.94394	7.41446	1	0.00212665	29.015	1	3.06842	17.5157	0.849381	0.44763	61.9287	0.898031	4.74074	18.5599	0.907619	UAAGGCACGCGGUGAAUGCC	experimental		mature miRNA	standard	MIMAT0000422	hsa-miR-124-3p	hsa-miR-124-3p
142	hsa-miR-124-5p	6.72691	16.0747	1	0.536132	8.24138	1	6.41177	18.3846	0.826264	3.94982	10.404	1	1.11572	25.9952	0.969147	4.20812	15.9648	0.888362	0.0693578	42.8613	1	1.39235	10.9892	1	CGUGUUCACAGCGGACCUUGAU	experimental		mature miRNA	standard	MIMAT0004591	hsa-miR-124-5p	hsa-miR-124-5p
143	hsa-miR-125a-3p	10.0617	15.3161	0.776496	10.5156	11.8748	0.541456	13.3651	25.8307	0.743866	3.00313	8.13571	0.948825	0.00215445	23.3205	1	5.80183	19.1953	0.758378	2.23992	79.7254	0.896828	5.5119	20.8026	0.945228	ACAGGUGAGGUUCUUGGGAGCC	experimental		mature miRNA	standard	MIMAT0004602	hsa-miR-125a-3p	hsa-miR-125a-3p
144	hsa-miR-125a-5p	1203.4	134.464	5.36868e-15	2013.55	185.98	3.06803e-19	773.36	163.38	6.94872e-06	766.743	83.7279	2.70349e-16	685.922	125.153	3.15056e-07	406.256	60.7757	3.6248e-13	391.651	86.7762	5.66729e-06	242.56	43.3462	0.00026089	UCCCUGAGACCCUUUAACCUGUGA	experimental		mature miRNA	standard	MIMAT0000443	hsa-miR-125a-5p	hsa-miR-125a-5p
145	hsa-miR-125b-1-3p	0.091516	4.80948	1	0.0149018	4.47271	1	0.0138974	6.6611	1	1.4037	3.35062	0.936999	0.0015978	16.8938	1	9.34617	11.1012	0.520059	0.000193281	12.734	1	0.0236967	6.95656	1	ACGGGUUAGGCUCUUGGGAGCU	experimental		mature miRNA	standard	MIMAT0004592	hsa-miR-125b-1-3p	hsa-miR-125b-1-3p
146	hsa-miR-125b-2-3p	0.0710474	5.55495	1	0.781002	5.8464	0.934059	42.2655	29.0422	0.325153	0.0578115	4.22308	1	0.0016448	16.0404	1	22.0353	5.48901	0.000157925	0.000261532	19.9775	1	0.0194836	7.0129	1	UCACAAGUCAGGCUCUUGGGAC	experimental		mature miRNA	standard	MIMAT0004603	hsa-miR-125b-2-3p	hsa-miR-125b-2-3p
147	hsa-miR-125b-5p	401.878	24.8365	1.66609e-70	743.851	46.8063	4.07618e-52	677.343	106.262	2.4428e-09	907.678	33.3658	1.70634e-164	140.661	41.248	0.00218118	50.3847	14.3118	7.84475e-07	222.584	15.618	3.29999e-72	138.227	21.8278	3.20964e-05	UCCCUGAGACCCUAACUUGUGA	experimental		mature miRNA	standard	MIMAT0000423	hsa-miR-125b-5p	hsa-miR-125b-5p
148	hsa-miR-126-3p	9.89235	10.2157	0.419501	8.8247	11.5681	0.623609	8.98483	14.6158	0.700818	9.37904	9.9731	0.508125	23.691	36.8769	0.47361	6.22953	18.147	0.678525	1.45824	40.2033	1	2.90827	13.7988	0.97274	UCGUACCGUGAGUAAUAAUGCG	experimental		mature miRNA	standard	MIMAT0000445	hsa-miR-126-3p	hsa-miR-126-3p
149	hsa-miR-126-5p	2.39173	11.1425	1	4.16039	15.7346	1	4.97166	13.7766	0.897847	2.26683	8.0089	1	1.71909	28.7961	0.934043	6.4795	18.669	0.724169	0.00468065	41.3792	1	4.58913	12.7222	1	CAUUAUUACUUUUGGUACGCG	experimental		mature miRNA	standard	MIMAT0000444	hsa-miR-126-5p	hsa-miR-126-5p
150	hsa-miR-127-3p	5.72573	11.7368	0.697095	5.40932	12.0087	0.766136	21.6151	16.7642	0.387049	33.1875	14.13	0.0431648	12.6987	44.3537	0.724517	2.03234	17.907	0.923356	11.252	46.1899	0.519021	5.83712	18.5575	0.946862	UCGGAUCCGUCUGAGCUUGGCU	experimental		mature miRNA	standard	MIMAT0000446	hsa-miR-127-3p	hsa-miR-127-3p
151	hsa-miR-127-5p	30.2931	65.4496	0.876568	0.953285	7.68763	1	7.30234	12.5396	0.654584	3.96348	10.5884	1	0.376488	24.4957	1	3.00216	16.1547	0.834514	1.54851	40.1775	0.884381	0.831754	12.5178	1	CUGAAGCUCAGAGGGCUCUGAU	experimental		mature miRNA	standard	MIMAT0004604	hsa-miR-127-5p	hsa-miR-127-5p
152	hsa-miR-128-1-5p	0.0678696	5.46009	1	3.63442	5.27687	0.497802	1.47311	6.19335	0.832674	1.22526	4.14158	0.874307	10.7538	51.5845	0.65288	0.0108621	11.008	1	9.56348	9.28163	3.51659e-10	0.0112602	8.62412	1	CGGGGCCGUAGCACUGUCUGAGA	experimental		mature miRNA	standard	MIMAT0026477	hsa-miR-128-1-5p	hsa-miR-128-1-5p
153	hsa-miR-128-2-5p	4.38083	5.04206	0.795765	4.29726	3.67329	0.280402	4.52065	4.51367	0.452839	0.0453777	2.24883	1	0.00146756	14.7038	1	0.0143199	6.551	1	8.93381	12.9752	3.89301e-06	0.0177941	4.95311	1	GGGGGCCGAUACACUGUACGAGA	experimental		mature miRNA	standard	MIMAT0031095	hsa-miR-128-2-5p	hsa-miR-128-2-5p
154	hsa-miR-128-3p	109.388	50.2016	0.023253	359.51	56.8796	2.479e-07	99.7584	43.5491	0.090554	80.6252	18.9471	7.76938e-05	129.755	48.9848	0.0229134	46.9155	27.1947	0.0136379	83.1729	64.0799	0.172857	38.7174	16.4542	0.130273	UCACAGUGAACCGGUCUCUUU	experimental		mature miRNA	standard	MIMAT0000424	hsa-miR-128-3p	hsa-miR-128-3p
155	hsa-miR-129-1-3p	7.12529	16.6681	0.83181	3.40883	17.513	0.901685	1.10322	15.1392	1	3.04958	8.93128	1	5.2091	25.9002	0.738633	3.54995	17.6474	0.858591	0.68358	41.6442	1	0.330347	12.2321	1	AAGCCCUUACCCCAAAAAGUAU	experimental		mature miRNA	standard	MIMAT0004548	hsa-miR-129-1-3p	hsa-miR-129-1-3p
156	hsa-miR-129-2-3p	6.48825	19.5745	0.998051	6.29111	13.8213	0.721773	5.93176	14.9272	0.776759	1.8313	6.96577	0.877427	3.03107	28.8078	0.919836	0.648025	16.8581	1	0.780551	41.0668	1	0.0134098	13.6041	1	AAGCCCUUACCCCAAAAAGCAU	experimental		mature miRNA	standard	MIMAT0004605	hsa-miR-129-2-3p	hsa-miR-129-2-3p
157	hsa-miR-129-5p	15.0781	28.0753	0.643062	4.93605	10.0423	0.73371	2.35678	16.4427	0.914712	1.41412	7.49179	1	5.55434	23.9283	0.747231	3.73306	17.8005	0.776756	4.0696	44.2304	0.824163	4.37581	16.5237	0.941594	CUUUUUGCGGUCUGGGCUUGC	experimental		mature miRNA	standard	MIMAT0000242	hsa-miR-129-5p	hsa-miR-129-5p
158	hsa-miR-130a-3p	11.1216	14.2721	0.340759	23.3064	11.9138	0.302146	53.9764	17.8851	0.0346697	100.412	20.5832	1.86201e-06	20.0212	30.4684	0.563847	20.6463	23.6968	0.214701	39.3573	48.9723	0.276802	32.647	18.6652	0.262462	CAGUGCAAUGUUAAAAGGGCAU	experimental		mature miRNA	standard	MIMAT0000425	hsa-miR-130a-3p	hsa-miR-130a-3p
159	hsa-miR-130a-5p	5.67229	10.7679	0.896434	1.30028	8.70233	1	2.84244	16.3212	1	0.357148	6.59823	1	1.40827	27.9363	0.991924	0.0139752	17.5305	1	2.19969	40.3033	0.613283	1.16649	12.9453	1	UUCACAUUGUGCUACUGUCUGC	experimental		mature miRNA	standard	MIMAT0004593	hsa-miR-130a-5p	hsa-miR-130a-5p
160	hsa-miR-130b-3p	136.657	22.4295	8.15117e-14	64.0853	12.5395	0.00126686	21.5553	6.8799	0.0450878	25.3043	12.0974	0.0537924	60.5236	16.7898	0.000510285	56.1511	23.8579	0.00134819	90.1638	14.7207	1.95933e-26	45.0487	12.1616	0.0172609	CAGUGCAAUGAUGAAAGGGCAU	experimental		mature miRNA	standard	MIMAT0000691	hsa-miR-130b-3p	hsa-miR-130b-3p
161	hsa-miR-130b-5p	2.918	5.19236	0.784055	9.99249	4.54671	0.292775	0.0132434	4.56649	1	3.32749	3.22881	0.69199	0.00249354	18.0871	1	14.9156	10.8648	0.0957217	7.63778	18.5669	0.0247901	22.613	10.9755	0.237199	ACUCUUUCCCUGUUGCACUAC	experimental		mature miRNA	standard	MIMAT0004680	hsa-miR-130b-5p	hsa-miR-130b-5p
162	hsa-miR-132-3p	27.2014	22.1168	0.078567	52.3895	20.3097	0.122786	24.7542	27.4968	0.513965	50.8956	17.1244	0.00286107	35.9643	35.3748	0.352099	31.4558	23.0142	0.0411204	198.757	54.1321	1.10846e-09	110.769	37.4747	0.0270931	UAACAGUCUACAGCCAUGGUCG	experimental		mature miRNA	standard	MIMAT0000426	hsa-miR-132-3p	hsa-miR-132-3p
163	hsa-miR-132-5p	2.63831	11.1281	0.93999	3.33137	9.85458	0.912823	4.01329	15.6853	0.911815	4.07235	8.72136	0.811458	7.83802	37.5515	0.798027	2.73599	18.8011	0.854243	15.3572	42.4529	0.143766	12.3934	18.1611	0.651705	ACCGUGGCUUUCGAUUGUUACU	experimental		mature miRNA	standard	MIMAT0004594	hsa-miR-132-5p	hsa-miR-132-5p
164	hsa-miR-133a-3p	9.44939	10.1998	0.54502	1.54646	8.8618	0.997874	10.3433	14.1236	0.63919	1.67909	7.00062	0.944996	14.7774	48.1763	0.650712	2.56189	16.5521	0.905775	3.85562	39.0738	0.620733	2.007	13.1335	1	UUUGGUCCCCUUCAACCAGCUG	experimental		mature miRNA	standard	MIMAT0000427	hsa-miR-133a-3p	hsa-miR-133a-3p
165	hsa-miR-133a-5p	403.821	32.3474	7.31188e-31	0.00990511	2.70593	1	0.0136712	5.52055	1	0.0655114	3.33737	1	1.50132	11.6077	0.720571	0.0204831	9.59693	1	0.0530135	11.9764	0.916094	0.0252053	6.22846	1	AGCUGGUAAAAUGGAACCAAAU	experimental		mature miRNA	standard	MIMAT0026478	hsa-miR-133a-5p	hsa-miR-133a-5p
166	hsa-miR-133b	0.0480141	7.47931	1	1.97016	3.268	0.711508	6.51837	9.3085	0.589387	3.33415	2.82055	0.500105	7.07576	13.3573	0.343988	0.0111847	8.61292	1	0.159429	14.3006	0.882631	10.7634	5.40264	0.0850372	UUUGGUCCCCUUCAACCAGCUA	experimental		mature miRNA	standard	MIMAT0000770	hsa-miR-133b	hsa-miR-133b
167	hsa-miR-134-3p	43.6073	29.833	0.437363	0.00830997	2.5195	1	0.0115069	7.91929	1	0.0548638	3.55295	1	2.73282	15.1557	0.616145	0.0171521	6.37933	1	1.03553	17.5782	0.385408	0.0213708	7.12783	1	CCUGUGGGCCACCUAGUCACCAA	experimental		mature miRNA	standard	MIMAT0026481	hsa-miR-134-3p	hsa-miR-134-3p
168	hsa-miR-134-5p	5.99755	10.1845	0.613221	3.46411	8.13769	0.860006	8.49748	23.7343	0.836671	9.90355	8.75928	0.452994	4.60261	28.3254	0.827739	1.77411	18.0975	0.922642	5.81681	38.448	0.550082	5.12634	17.8541	0.930606	UGUGACUGGUUGACCAGAGGGG	experimental		mature miRNA	standard	MIMAT0000447	hsa-miR-134-5p	hsa-miR-134-5p
169	hsa-miR-135a-3p	9.04998	12.089	0.622115	2.2557	8.58867	0.959031	5.60281	15.4016	0.886229	2.40973	8.65816	1	2.89935	25.0953	0.842614	2.23731	16.4139	0.947977	2.08718	38.9155	0.749981	0.0176845	15.1426	1	UAUAGGGAUUGGAGCCGUGGCG	experimental		mature miRNA	standard	MIMAT0004595	hsa-miR-135a-3p	hsa-miR-135a-3p
170	hsa-miR-135a-5p	8.35296	17.7136	0.87406	1.38708	7.57814	1	4.84305	17.9764	0.891589	0.0388243	6.57854	1	6.27702	30.5838	0.667221	3.02918	17.9496	1	0.743936	39.1602	0.917213	0.71358	12.0676	1	UAUGGCUUUUUAUUCCUAUGUGA	experimental		mature miRNA	standard	MIMAT0000428	hsa-miR-135a-5p	hsa-miR-135a-5p
171	hsa-miR-135b-3p	0.0859636	5.91903	1	0.00775767	3.4468	1	0.535106	6.33414	0.936953	0.0450413	3.7474	1	2.73026	12.1849	0.476235	0.0142872	10.8761	1	0.152079	10.0098	0.745341	0.015535	5.98107	1	AUGUAGGGCUAAAAGCCAUGGG	experimental		mature miRNA	standard	MIMAT0004698	hsa-miR-135b-3p	hsa-miR-135b-3p
172	hsa-miR-135b-5p	334.233	34.2273	2.76995e-20	3.98345	4.07562	0.597471	0.0183193	7.95019	1	8.76215	3.01713	0.314181	11.0497	25.9482	0.495511	0.0209197	7.64537	1	0.000276037	14.8394	1	0.0200237	6.0563	1	UAUGGCUUUUCAUUCCUAUGUGA	experimental		mature miRNA	standard	MIMAT0000758	hsa-miR-135b-5p	hsa-miR-135b-5p
173	hsa-miR-136-3p	11.9794	39.7747	0.896436	1.06066	8.39405	0.937981	1.53566	12.416	1	1.88045	8.66217	1	1.62686	22.0779	0.93445	0.113997	16.6426	1	1.4447	41.928	0.826801	3.4052	16.2501	0.994772	CAUCAUCGUCUCAAAUGAGUCU	experimental		mature miRNA	standard	MIMAT0004606	hsa-miR-136-3p	hsa-miR-136-3p
174	hsa-miR-136-5p	4.0321	10.9815	0.874211	1.87729	11.0843	1	2.4083	11.978	1	0.0470831	6.45218	1	0.492259	22.9292	1	0.0154103	17.6013	1	0.31232	38.8667	1	6.37226	21.8609	0.976693	ACUCCAUUUGUUUUGAUGAUGGA	experimental		mature miRNA	standard	MIMAT0000448	hsa-miR-136-5p	hsa-miR-136-5p
175	hsa-miR-137	4.16996	11.9942	0.857788	1.54286	8.12841	0.897058	3.08054	11.6204	1	2.04825	7.96306	1	2.93573	25.4209	0.852567	0.387527	15.8544	1	1.0314	40.6773	0.903235	1.01764	11.9907	1	UUAUUGCUUAAGAAUACGCGUAG	experimental		mature miRNA	standard	MIMAT0000429	hsa-miR-137	hsa-miR-137
176	hsa-miR-138-1-3p	19.9512	36.234	0.681371	5.16734	11.4253	0.687769	3.93811	20.2777	0.952878	0.0357388	6.76129	1	3.36754	20.5009	0.791776	0.0124005	17.6226	1	2.35386	40.6878	0.738005	5.21519	14.0076	0.832206	GCUACUUCACAACACCAGGGCC	experimental		mature miRNA	standard	MIMAT0004607	hsa-miR-138-1-3p	hsa-miR-138-1-3p
177	hsa-miR-138-2-3p	6.66083	13.4502	0.765179	5.76695	20.7953	0.860834	1.56023	12.4651	1	0.220063	6.82369	1	3.14692	24.3961	0.804521	1.72525	18.7769	1	0.392302	38.1861	0.995579	1.48448	13.0582	1	GCUAUUUCACGACACCAGGGUU	experimental		mature miRNA	standard	MIMAT0004596	hsa-miR-138-2-3p	hsa-miR-138-2-3p
178	hsa-miR-138-5p	6.33552	13.2826	0.823543	2.38544	8.22116	0.904301	10.2978	15.4075	0.610913	0.3577	7.00622	1	1.48235	25.5747	0.959059	2.40499	15.1983	0.853626	1.17645	40.4515	0.905714	3.36189	14.4441	0.937479	AGCUGGUGUUGUGAAUCAGGCCG	experimental		mature miRNA	standard	MIMAT0000430	hsa-miR-138-5p	hsa-miR-138-5p
179	hsa-miR-139-3p	3.44004	10.8652	0.871763	2.36382	8.91489	0.940912	5.03132	14.8158	0.964494	6.73387	11.6236	0.771508	0.175359	23.558	1	4.6958	15.4369	0.747771	4.30487	63.4538	0.741902	8.84747	22.3041	0.889709	UGGAGACGCGGCCCUGUUGGAGU	experimental		mature miRNA	standard	MIMAT0004552	hsa-miR-139-3p	hsa-miR-139-3p
180	hsa-miR-139-5p	6.09073	12.6511	0.696425	3.9389	8.51703	0.887937	17.7711	18.7535	0.494822	1.12246	7.85375	1	3.379	24.5116	0.933399	2.81842	17.3769	0.997088	0.524316	37.8656	1	6.63772	14.8696	0.756964	UCUACAGUGCACGUGUCUCCAGU	experimental		mature miRNA	standard	MIMAT0000250	hsa-miR-139-5p	hsa-miR-139-5p
181	hsa-miR-140-3p	4509.65	204.924	6.79358e-88	6206.41	453.556	7.8755e-50	3654.77	219.733	8.69946e-72	3217.42	147.763	1.45155e-84	5668.03	506.762	7.84816e-27	1590.53	117.191	8.87043e-49	1920.55	126.798	4.47338e-27	1509.91	132.333	5.92909e-21	UACCACAGGGUAGAACCACGG	experimental		mature miRNA	standard	MIMAT0004597	hsa-miR-140-3p	hsa-miR-140-3p
182	hsa-miR-140-5p	66.6712	25.2569	0.000965861	107.598	24.7986	0.00538636	57.2492	21.0636	0.0858751	47.7876	16.7943	0.00950386	64.1803	37.337	0.0975023	28.4852	20.8471	0.0649552	21.5316	97.4714	0.545991	14.933	15.7403	0.499389	CAGUGGUUUUACCCUAUGGUAG	experimental		mature miRNA	standard	MIMAT0000431	hsa-miR-140-5p	hsa-miR-140-5p
183	hsa-miR-141-3p	48.6412	29.4331	0.0362862	121.835	27.7395	0.00315454	58.079	26.8355	0.0914877	42.829	20.1031	0.0586005	70.8458	37.2626	0.0725069	29.8011	22.7969	0.0678422	9.59791	40.4706	0.607077	10.6478	14.5713	0.622325	UAACACUGUCUGGUAAAGAUGG	experimental		mature miRNA	standard	MIMAT0000432	hsa-miR-141-3p	hsa-miR-141-3p
184	hsa-miR-141-5p	7.6191	15.2126	0.718295	5.50259	15.0783	0.739102	3.52912	10.6283	0.845103	0.043719	7.93246	1	3.70137	31.7018	0.803783	0.894032	17.0137	1	0.235623	39.5809	1	0.0625127	10.6079	1	CAUCUUCCAGUACAGUGUUGGA	experimental		mature miRNA	standard	MIMAT0004598	hsa-miR-141-5p	hsa-miR-141-5p
185	hsa-miR-142-3p	876.882	214.677	5.37756e-05	745.651	79.028	1.1527e-19	1204.74	76.1779	3.48517e-56	2199.41	109.748	2.0914e-69	3228.25	228.71	1.56256e-55	2088.11	109.656	2.18901e-89	1393.24	185.257	1.92754e-05	877.546	83.6568	5.47712e-17	UGUAGUGUUUCCUACUUUAUGGA	experimental		mature miRNA	standard	MIMAT0000434	hsa-miR-142-3p	hsa-miR-142-3p
186	hsa-miR-142-5p	5586.52	626.722	1.45826e-17	4545.85	182.902	2.44556e-91	6562.66	287.886	3.51708e-168	6692.08	202.303	0	15965.3	855.641	1.7809e-119	13421.2	446.067	5.41996e-279	9798.6	898.535	4.17562e-09	7791.31	515.812	4.8243e-46	CAUAAAGUAGAAAGCACUACU	experimental		mature miRNA	standard	MIMAT0000433	hsa-miR-142-5p	hsa-miR-142-5p
187	hsa-miR-143-3p	2.43863	11.3203	1	5.5048	13.9964	0.839612	221.536	48.6328	0.000104211	142.994	26.5364	9.97411e-09	13.9286	31.6574	0.638632	2.57562	15.3143	0.795808	47.2297	44.7704	0.0955789	21.9854	22.2984	0.503804	UGAGAUGAAGCACUGUAGCUC	experimental		mature miRNA	standard	MIMAT0000435	hsa-miR-143-3p	hsa-miR-143-3p
188	hsa-miR-143-5p	3.07123	11.4305	1	0.817337	8.16067	1	10.7239	26.8074	0.749808	0.0378	6.79698	1	6.36944	26.8105	0.682873	1.43514	16.2095	0.9466	0.322195	41.164	1	3.96446	11.9783	0.920271	GGUGCAGUGCUGCAUCUCUGGU	experimental		mature miRNA	standard	MIMAT0004599	hsa-miR-143-5p	hsa-miR-143-5p
189	hsa-miR-144-3p	6.46238	12.3326	0.629293	14.0537	28.7939	0.773631	26.8104	30.0297	0.531934	7.78598	9.72201	0.569735	26.8406	30.1416	0.319166	8.02684	18.4593	0.568868	1.04304	40.8647	1	7.15969	14.1623	0.845985	UACAGUAUAGAUGAUGUACU	experimental		mature miRNA	standard	MIMAT0000436	hsa-miR-144-3p	hsa-miR-144-3p
190	hsa-miR-144-5p	7.43756	11.993	0.656872	3.7339	9.71777	0.94495	12.3753	16.1062	0.635294	7.33585	9.28947	0.663769	11.8472	26.943	0.532409	4.74722	16.5556	0.753751	0.0394313	40.0762	1	1.21341	12.0792	1	GGAUAUCAUCAUAUACUGUAAG	experimental		mature miRNA	standard	MIMAT0004600	hsa-miR-144-5p	hsa-miR-144-5p
191	hsa-miR-145-3p	1.17604	10.4152	1	2.28414	8.28074	0.933126	2.89889	12.2315	0.978589	1.77251	8.49141	0.991831	14.7863	57.6795	0.69876	6.80901	18.4669	0.751197	0.0887288	39.9191	1	4.65045	13.3451	0.900963	GGAUUCCUGGAAAUACUGUUCU	experimental		mature miRNA	standard	MIMAT0004601	hsa-miR-145-3p	hsa-miR-145-3p
192	hsa-miR-145-5p	9.31559	12.053	0.345911	5.79055	11.074	0.77612	191.798	41.4121	0.000206202	388.542	39.6934	1.20825e-18	35.493	73.49	0.619691	3.9223	18.3003	0.757515	77.4553	52.7686	0.0680591	34.815	18.2678	0.247494	GUCCAGUUUUCCCAGGAAUCCCU	experimental		mature miRNA	standard	MIMAT0000437	hsa-miR-145-5p	hsa-miR-145-5p
193	hsa-miR-146a-3p	3.14695	10.4626	0.922042	7.66823	11.0125	0.64231	3.21517	15.9707	0.956274	2.66762	7.50635	0.841591	6.73279	24.922	0.652505	6.11212	17.7388	0.686562	0.713098	40.0586	1	1.65149	14.6074	1	CCUCUGAAAUUCAGUUCUUCAG	experimental		mature miRNA	standard	MIMAT0004608	hsa-miR-146a-3p	hsa-miR-146a-3p
194	hsa-miR-146a-5p	8543.55	342.262	2.22828e-99	6816.85	239.269	2.72081e-98	5965.95	277.234	2.00856e-77	6125.7	134.446	5.39074e-205	10629.6	981.008	7.53335e-24	11570.3	525.136	1.43534e-128	5761.14	1468.77	0.000984632	10709.2	812.745	1.52233e-36	UGAGAACUGAAUUCCAUGGGUU	experimental		mature miRNA	standard	MIMAT0000449	hsa-miR-146a-5p	hsa-miR-146a-5p
195	hsa-miR-146b-3p	20.5857	5.99029	0.000156919	78.5077	11.5878	0.000727503	16.4139	9.12998	0.380854	15.6153	6.7937	0.16877	35.5938	24.7324	0.163085	18.3008	14.2693	0.171225	0.000525542	14.1884	1	8.12579	5.7474	0.382875	UGCCCUGUGGACUCAGUUCUGG	experimental		mature miRNA	standard	MIMAT0004766	hsa-miR-146b-3p	hsa-miR-146b-3p
196	hsa-miR-146b-5p	6868.08	112.681	0	6476.23	227.309	2.19372e-179	6341.4	162.442	0	6138.66	175.224	2.92742e-269	11840.7	262.412	0	10077.4	204.975	0	4730.77	198.899	1.10299e-124	11221.5	395.474	5.62093e-170	UGAGAACUGAAUUCCAUAGGCU	experimental		mature miRNA	standard	MIMAT0002809	hsa-miR-146b-5p	hsa-miR-146b-5p
197	hsa-miR-147a	8.37987	17.2994	0.748525	2.05667	8.38103	0.912915	2.27105	12.7248	0.979726	3.11589	8.77757	0.96211	2.15454	25.5346	0.883512	7.19838	19.0253	0.666009	1.38239	42.0739	1	3.49181	14.879	1	GUGUGUGGAAAUGCUUCUGC	experimental		mature miRNA	standard	MIMAT0000251	hsa-miR-147a	hsa-miR-147a
198	hsa-miR-147b	0.113239	5.92549	1	2.69246	3.60898	0.626431	0.0126244	5.85664	1	0.069163	2.54526	1	0.00131088	18.1622	1	0.0184413	9.40618	1	0.000167934	10.8407	1	0.0160212	6.62378	1	GUGUGCGGAAAUGCUUCUGCUA	experimental		mature miRNA	standard	MIMAT0004928	hsa-miR-147b	hsa-miR-147b
199	hsa-miR-148a-3p	254.373	37.827	3.56541e-15	660.009	83.7246	4.27007e-12	230.989	43.0926	2.64921e-06	218.154	32.8527	1.5975e-11	625.385	99.6679	3.56758e-08	164.231	36.6672	4.40949e-08	192.759	45.5603	5.10069e-08	86.1272	37.6004	0.0917103	UCAGUGCACUACAGAACUUUGU	experimental		mature miRNA	standard	MIMAT0000243	hsa-miR-148a-3p	hsa-miR-148a-3p
200	hsa-miR-148a-5p	11.0179	17.427	0.667505	4.10446	9.72109	0.834933	0.044473	14.465	1	6.08336	7.93258	0.689826	4.66555	23.8152	0.747431	2.57205	18.8189	1	3.06686	39.8883	0.845098	1.70749	15.4585	1	AAAGUUCUGAGACACUCCGACU	experimental		mature miRNA	standard	MIMAT0004549	hsa-miR-148a-5p	hsa-miR-148a-5p
201	hsa-miR-148b-3p	257.021	35.0102	4.09595e-17	822.626	77.1184	1.08968e-24	230.444	33.7219	7.21691e-09	274.497	27.4165	4.12899e-24	539.798	74.6893	5.66562e-12	148.855	39.2295	2.2237e-06	277.21	23.86	6.19574e-45	143.441	25.6058	0.000181938	UCAGUGCAUCACAGAACUUUGU	experimental		mature miRNA	standard	MIMAT0000759	hsa-miR-148b-3p	hsa-miR-148b-3p
202	hsa-miR-148b-5p	0.0356457	7.092	1	3.75998	7.19935	0.740617	10.7483	6.85449	0.204724	8.76275	2.92516	0.0103581	18.7988	27.6676	0.345808	9.3283	10.0695	0.119338	42.7614	20.3272	7.44576e-09	5.81917	5.88916	0.411895	AAGUUCUGUUAUACACUCAGGC	experimental		mature miRNA	standard	MIMAT0004699	hsa-miR-148b-5p	hsa-miR-148b-5p
203	hsa-miR-149-3p	505.597	34.987	2.48456e-61	309.255	126.167	0.0287908	581.415	110.014	2.3978e-06	419.422	43.1777	4.90067e-23	640.499	127.469	5.21411e-07	802.942	79.1372	3.67257e-27	498.117	108.492	1.03769e-06	552.812	93.9721	1.3737e-06	AGGGAGGGACGGGGGCUGUGC	experimental		mature miRNA	standard	MIMAT0004609	hsa-miR-149-3p	hsa-miR-149-3p
204	hsa-miR-149-5p	10.7392	17.4462	0.819222	6.8199	15.4315	0.674283	7.96287	19.6935	0.813545	6.06164	8.25748	0.651507	3.16339	25.7764	0.816134	2.17979	18.0751	1	11.3352	41.9893	0.376457	1.22839	12.9053	1	UCUGGCUCCGUGUCUUCACUCCC	experimental		mature miRNA	standard	MIMAT0000450	hsa-miR-149-5p	hsa-miR-149-5p
205	hsa-miR-150-3p	103.348	23.0189	7.76386e-08	244.168	60.8211	0.000534914	26.7819	27.4075	0.518689	31.2098	10.8549	0.0126053	71.7884	40.8168	0.088895	11.3749	20.2197	0.451025	27.9714	50.7325	0.298424	4.24978	15.6026	0.867253	CUGGUACAGGCCUGGGGGACAG	experimental		mature miRNA	standard	MIMAT0004610	hsa-miR-150-3p	hsa-miR-150-3p
206	hsa-miR-150-5p	44196.4	1422.14	0	37707.5	899.072	0	39553.4	2349.3	1.78226e-52	31459	857.721	2.03165e-306	21900.4	1296.82	2.52597e-48	30145.6	5377.09	2.17246e-08	54244.3	4120.15	1.40878e-27	21617.2	1971.59	2.48849e-27	UCUCCCAACCCUUGUACCAGUG	experimental		mature miRNA	standard	MIMAT0000451	hsa-miR-150-5p	hsa-miR-150-5p
207	hsa-miR-151a-3p	131.662	29.5114	5.75331e-06	96.8077	56.4108	0.105503	51.6838	26.2792	0.166832	69.3769	17.9357	0.000281872	47.9709	39.5466	0.168714	25.6558	31.7115	0.314954	40.2822	49.177	0.173649	2.48182	14.4521	1	CUAGACUGAAGCUCCUUGAGG	experimental		mature miRNA	standard	MIMAT0000757	hsa-miR-151a-3p	hsa-miR-151a-3p
208	hsa-miR-151a-5p	575.441	58.7282	4.26515e-23	1277.54	101.768	3.20612e-32	458.301	58.3247	3.36474e-11	450.249	42.2184	6.50804e-27	720.607	93.4658	4.68917e-13	212.216	54.0176	2.95404e-06	275.365	69.5492	8.38103e-05	119.47	53.1801	0.0953222	UCGAGGAGCUCACAGUCUAGU	experimental		mature miRNA	standard	MIMAT0004697	hsa-miR-151a-5p	hsa-miR-151a-5p
209	hsa-miR-151b	464.814	40.5834	2.04382e-35	1067.48	79.2464	2.25977e-39	406.92	29.3696	1.32434e-35	389.953	36.6823	8.32891e-27	531.337	61.4645	1.66884e-16	176.177	31.151	6.11471e-12	267.79	35.5226	1.00524e-19	139.134	11.4608	2.52132e-15	UCGAGGAGCUCACAGUCU	experimental		mature miRNA	standard	MIMAT0010214	hsa-miR-151b	hsa-miR-151b
210	hsa-miR-152-3p	54.9535	19.128	0.000306514	111.511	29.114	0.00860736	40.6098	24.5737	0.224107	64.8879	20.388	0.00186183	70.6849	36.1484	0.0671394	17.1833	25.3708	0.339626	45.4136	53.9888	0.171571	24.0189	51.9457	0.742383	UCAGUGCAUGACAGAACUUGG	experimental		mature miRNA	standard	MIMAT0000438	hsa-miR-152-3p	hsa-miR-152-3p
211	hsa-miR-152-5p	0.0813974	6.4674	1	0.00837163	3.55586	1	3.23631	4.80692	0.587323	7.58629	2.56206	0.19106	0.00146545	21.8693	1	0.0140952	8.46594	1	17.3126	18.433	1.2534e-07	0.0203544	7.02431	1	AGGUUCUGUGAUACACUCCGACU	experimental		mature miRNA	standard	MIMAT0026479	hsa-miR-152-5p	hsa-miR-152-5p
212	hsa-miR-153-3p	9.57697	16.2873	0.760612	7.43574	12.0115	0.60229	0.0127938	12.3604	1	4.31531	9.73777	0.966289	2.84164	25.7362	0.797743	1.66549	18.4541	1	4.66197	42.7408	0.64661	1.05935	12.6127	1	UUGCAUAGUCACAAAAGUGAUC	experimental		mature miRNA	standard	MIMAT0000439	hsa-miR-153-3p	hsa-miR-153-3p
213	hsa-miR-153-5p	0.0647217	5.64433	1	0.0126282	4.89179	1	0.0105627	8.92869	1	2.20201	2.96869	0.809943	0.00177605	17.7331	1	5.94869	10.9057	0.535732	10.9525	14.5494	1.0982e-06	3.34209	6.76562	0.808764	UCAUUUUUGUGAUGUUGCAGCU	experimental		mature miRNA	standard	MIMAT0026480	hsa-miR-153-5p	hsa-miR-153-5p
214	hsa-miR-154-3p	7.35196	13.2483	0.760323	3.97778	11.4735	0.793326	2.1564	13.0846	1	19.2997	10.1316	0.205458	5.14872	34.1779	0.758391	0.0135302	17.7536	1	7.1762	47.5139	0.539094	0.0162525	12.7532	1	AAUCAUACACGGUUGACCUAUU	experimental		mature miRNA	standard	MIMAT0000453	hsa-miR-154-3p	hsa-miR-154-3p
215	hsa-miR-154-5p	10.2092	15.8673	0.781461	8.02731	25.4115	0.797659	0.0124255	11.3279	1	1.7804	7.30908	1	1.1036	22.9305	0.970822	2.17706	17.183	1	3.97207	42.7559	0.612679	0.0173839	14.3057	1	UAGGUUAUCCGUGUUGCCUUCG	experimental		mature miRNA	standard	MIMAT0000452	hsa-miR-154-5p	hsa-miR-154-5p
216	hsa-miR-155-3p	2.08382	11.2097	1	0.0181268	8.53072	1	5.93044	14.2738	0.804373	88.6347	21.871	0.000773037	0.00311113	23.7798	1	217.353	52.9585	6.73578e-06	129.762	46.3146	3.16761e-08	238.933	53.6927	0.00368092	CUCCUACAUAUUAGCAUUAACA	experimental		mature miRNA	standard	MIMAT0004658	hsa-miR-155-3p	hsa-miR-155-3p
217	hsa-miR-155-5p	1746.85	277.107	4.79912e-10	1319.72	99.6488	5.58076e-28	1114.41	141.835	8.59683e-12	6177.03	318.921	1.00403e-66	1015.46	157.919	3.51822e-09	11711.2	2317.19	7.39885e-07	18353.7	967.61	3.94935e-84	18784.3	1888.3	1.90165e-22	UUAAUGCUAAUCGUGAUAGGGGU	experimental		mature miRNA	standard	MIMAT0000646	hsa-miR-155-5p	hsa-miR-155-5p
218	hsa-miR-181a-2-3p	33.7527	15.8558	0.0609469	26.8267	13.9758	0.179281	10.2545	13.5032	0.682126	10.41	10.7834	0.493544	13.2583	32.2939	0.547834	4.03488	18.2185	0.909466	6.78536	44.3412	0.594992	3.26533	15.3755	1	ACCACUGACCGUUGACUGUACC	experimental		mature miRNA	standard	MIMAT0004558	hsa-miR-181a-2-3p	hsa-miR-181a-2-3p
219	hsa-miR-181a-3p	19.3085	19.7251	0.321639	11.148	12.6606	0.555432	6.2201	14.5278	0.829099	6.71361	7.55962	0.545861	13.1751	27.5026	0.526142	3.11668	19.1011	0.927737	11.086	46.0022	0.551813	6.85353	21.7392	0.856215	ACCAUCGACCGUUGAUUGUACC	experimental		mature miRNA	standard	MIMAT0000270	hsa-miR-181a-3p	hsa-miR-181a-3p
220	hsa-miR-181a-5p	4824.32	240.165	2.47466e-83	4915.09	394.093	4.95638e-50	3153.74	184.62	2.39655e-54	2099.75	104.532	1.71419e-67	5150.57	504.403	3.0467e-23	1971.12	115.59	2.09457e-52	1970.57	151.279	1.2794e-22	1195.91	150.01	2.05377e-11	AACAUUCAACGCUGUCGGUGAGU	experimental		mature miRNA	standard	MIMAT0000256	hsa-miR-181a-5p	hsa-miR-181a-5p
221	hsa-miR-181b-3p	0.0704193	6.23717	1	4.66172	8.65394	0.626976	0.00941792	5.27752	1	0.0864375	2.49057	0.991091	4.19762	17.453	0.533547	6.51423	5.72905	0.116315	14.1377	24.8276	0.00212288	0.0122495	7.78319	1	CUCACUGAACAAUGAAUGCAA	experimental		mature miRNA	standard	MIMAT0022692	hsa-miR-181b-3p	hsa-miR-181b-3p
222	hsa-miR-181b-5p	341.518	35.869	3.21327e-26	462.671	57.7357	1.66201e-13	179.61	21.3714	6.72473e-12	186.615	18.9375	1.11121e-23	526.096	47.6317	6.0088e-26	213.48	40.2609	2.63335e-10	218.539	40.0984	5.30947e-12	96.7527	19.8171	0.00151486	AACAUUCAUUGCUGUCGGUGGGU	experimental		mature miRNA	standard	MIMAT0000257	hsa-miR-181b-5p	hsa-miR-181b-5p
223	hsa-miR-181c-3p	0.0758362	4.69909	1	0.00833632	3.75917	1	0.0098252	6.94748	1	5.0565	3.04249	0.426328	7.91863	11.7443	0.119107	0.177078	9.20897	0.985558	10.4633	19.3416	0.000205064	0.0159825	6.65351	1	AACCAUCGACCGUUGAGUGGAC	experimental		mature miRNA	standard	MIMAT0004559	hsa-miR-181c-3p	hsa-miR-181c-3p
224	hsa-miR-181c-5p	150.924	24.4077	3.63841e-14	547.476	73.6594	4.29143e-12	228.834	21.1418	1.09444e-19	315.537	28.5319	6.25248e-29	906.143	75.7859	4.545e-31	89.8966	23.826	5.90778e-07	126.182	26.1104	1.38551e-11	146.044	15.7416	1.88966e-10	AACAUUCAACCUGUCGGUGAGU	experimental		mature miRNA	standard	MIMAT0000258	hsa-miR-181c-5p	hsa-miR-181c-5p
225	hsa-miR-181d-3p	0.0576792	4.61123	1	0.00857934	2.91951	1	2.04574	5.80341	0.763449	4.95457	3.47496	0.41822	17.2924	54.8367	0.562231	2.89616	6.62557	0.596178	13.0374	32.9216	0.0322311	0.0165831	6.39838	1	CCACCGGGGGAUGAAUGUCAC	experimental		mature miRNA	standard	MIMAT0026608	hsa-miR-181d-3p	hsa-miR-181d-3p
226	hsa-miR-181d-5p	44.09	17.0251	0.00019576	75.254	17.0589	0.00380598	95.0678	14.5124	8.19417e-07	110.602	16.5984	8.43604e-12	255.341	67.8881	0.000462148	138.489	27.2152	1.47858e-10	123.469	23.921	1.59808e-14	48.1761	8.33571	0.000146738	AACAUUCAUUGUUGUCGGUGGGU	experimental		mature miRNA	standard	MIMAT0002821	hsa-miR-181d-5p	hsa-miR-181d-5p
227	hsa-miR-182-3p	7.88815	16.6718	0.912834	1.74038	8.44699	0.965624	0.634138	11.0219	1	0.0413396	6.41058	1	2.78858	23.3834	0.740542	0.911977	15.3051	1	2.23387	39.4736	0.735853	0.0151579	11.8094	1	UGGUUCUAGACUUGCCAACUA	experimental		mature miRNA	standard	MIMAT0000260	hsa-miR-182-3p	hsa-miR-182-3p
228	hsa-miR-182-5p	5.28768	13.2274	0.946379	1.19071	9.31111	0.900966	3.87522	19.2523	0.891259	0.0376144	6.41108	1	7.74529	37.1808	0.659593	4.01286	18.2414	0.810205	3.57209	41.3071	0.679929	0.154301	12.0592	1	UUUGGCAAUGGUAGAACUCACACU	experimental		mature miRNA	standard	MIMAT0000259	hsa-miR-182-5p	hsa-miR-182-5p
229	hsa-miR-183-3p	0.0915968	11.3995	1	0.357339	8.44978	1	0.00944955	11.8491	1	0.0491507	6.86939	1	1.10363	23.7096	0.864906	0.402133	16.2032	1	1.32443	41.7884	0.777185	1.06766	11.8492	1	GUGAAUUACCGAAGGGCCAUAA	experimental		mature miRNA	standard	MIMAT0004560	hsa-miR-183-3p	hsa-miR-183-3p
230	hsa-miR-183-5p	5.8534	12.5153	0.980848	3.14494	9.406	0.90372	0.652723	12.5442	1	3.40127	10.1129	1	5.5418	23.2575	0.624109	3.68961	17.6208	0.813637	1.84451	39.5323	0.822503	2.99659	13.5692	1	UAUGGCACUGGUAGAAUUCACU	experimental		mature miRNA	standard	MIMAT0000261	hsa-miR-183-5p	hsa-miR-183-5p
231	hsa-miR-184	0.0774876	10.0353	1	7.46239	18.8862	0.727529	1.63633	14.1127	1	2.54455	7.63395	1	9.45718	59.0263	0.767382	1.33286	16.1353	0.961529	1.77996	41.5916	0.823018	0.454144	11.1874	1	UGGACGGAGAACUGAUAAGGGU	experimental		mature miRNA	standard	MIMAT0000454	hsa-miR-184	hsa-miR-184
232	hsa-miR-185-3p	9.27631	21.752	0.82728	0.102449	10.7421	1	0.0108599	10.5805	1	1.22365	6.49645	1	10.7797	49.2591	0.644341	0.0143035	16.3163	1	0.395379	39.2856	1	2.60372	13.8463	1	AGGGGCUGGCUUUCCUCUGGUC	experimental		mature miRNA	standard	MIMAT0004611	hsa-miR-185-3p	hsa-miR-185-3p
233	hsa-miR-185-5p	229.092	29.4548	1.16013e-19	488.748	127.511	0.000370644	181.543	69.7318	0.0296306	130.582	49.5945	0.00563742	439.098	96.8481	5.92798e-05	142.455	39.6108	2.59682e-06	144.857	59.4847	0.0203198	82.8858	30.2348	0.0568764	UGGAGAGAAAGGCAGUUCCUGA	experimental		mature miRNA	standard	MIMAT0000455	hsa-miR-185-5p	hsa-miR-185-5p
234	hsa-miR-186-3p	19.7147	42.621	1	2.04865	12.963	0.99394	13.5848	44.025	0.811631	4.78071	11.7086	1	2.6712	24.039	0.74513	0.934176	16.0407	1	0.222518	40.4693	0.99964	0.0130719	11.5453	1	GCCCAAAGGUGAAUUUUUUGGG	experimental		mature miRNA	standard	MIMAT0004612	hsa-miR-186-3p	hsa-miR-186-3p
235	hsa-miR-186-5p	1348.92	253.227	1.23134e-07	1751.26	237.364	5.28188e-11	896.041	112.076	3.72829e-13	910.361	56.3952	1.10754e-42	1931.05	204.702	5.54e-16	838.238	86.1522	7.22102e-26	1005.05	251.681	0.00167684	574.614	73.9772	2.61932e-09	CAAAGAAUUCUCCUUUUGGGCU	experimental		mature miRNA	standard	MIMAT0000456	hsa-miR-186-5p	hsa-miR-186-5p
236	hsa-miR-187-3p	4.97124	12.3825	0.954146	2.0073	10.1472	0.947734	10.3016	44.737	0.889451	3.66344	9.94294	0.97151	7.21722	29.1276	0.70503	4.64651	17.4298	0.921738	2.15235	39.8114	0.872866	4.12346	12.9482	0.887675	UCGUGUCUUGUGUUGCAGCCGG	experimental		mature miRNA	standard	MIMAT0000262	hsa-miR-187-3p	hsa-miR-187-3p
237	hsa-miR-187-5p	8.16502	15.9156	0.903876	7.0403	11.1894	0.694773	1.06574	13.5919	1	7.73962	10.9495	0.651736	5.05927	31.4091	0.738142	0.491345	15.7028	1	2.07032	38.2502	0.862207	3.14629	24.6399	0.997963	GGCUACAACACAGGACCCGGGC	experimental		mature miRNA	standard	MIMAT0004561	hsa-miR-187-5p	hsa-miR-187-5p
238	hsa-miR-188-3p	5.23542	16.1739	1	4.27972	10.1631	0.726811	0.00933857	11.7667	1	0.53753	6.16928	1	3.02882	21.577	0.706369	1.88462	17.22	1	1.05935	42.052	0.976673	1.18152	16.0236	1	CUCCCACAUGCAGGGUUUGCA	experimental		mature miRNA	standard	MIMAT0004613	hsa-miR-188-3p	hsa-miR-188-3p
239	hsa-miR-188-5p	19.6973	12.0705	0.0813102	3.35717	8.18246	0.896109	2.64744	12.3333	1	6.97963	9.1345	0.665704	13.3293	32.078	0.621782	6.39118	18.8022	0.660812	4.79429	40.1654	0.854638	5.23567	13.4474	0.840376	CAUCCCUUGCAUGGUGGAGGG	experimental		mature miRNA	standard	MIMAT0000457	hsa-miR-188-5p	hsa-miR-188-5p
240	hsa-miR-190a-3p	0.0743957	6.9806	1	0.00870391	4.60271	1	1.23747	5.26974	0.836759	0.0467822	3.5859	1	0.103291	18.6116	0.980588	3.89265	7.35951	0.582871	0.736793	15.2625	0.509607	0.0188186	6.49954	1	CUAUAUAUCAAACAUAUUCCU	experimental		mature miRNA	standard	MIMAT0026482	hsa-miR-190a-3p	hsa-miR-190a-3p
241	hsa-miR-190a-5p	2.11294	11.2218	1	1.35687	9.51274	1	3.8172	22.7877	0.956343	1.65562	6.50389	1	3.39176	23.4266	0.762161	1.38934	15.658	1	1.54688	38.2095	0.661024	0.911452	11.4854	1	UGAUAUGUUUGAUAUAUUAGGU	experimental		mature miRNA	standard	MIMAT0000458	hsa-miR-190a-5p	hsa-miR-190a-5p
242	hsa-miR-190b	7.42303	13.5821	0.82407	8.67495	25.713	0.848211	0.74179	13.2798	1	6.07613	8.24524	0.691874	7.60739	26.835	0.77738	1.11463	15.8369	0.995138	1.6069	39.7078	0.780374	0.34102	12.0992	1	UGAUAUGUUUGAUAUUGGGUU	experimental		mature miRNA	standard	MIMAT0004929	hsa-miR-190b	hsa-miR-190b
243	hsa-miR-191-3p	8.78518	14.0384	0.711046	137.937	98.7565	0.189546	0.0116229	12.8535	1	1.44221	7.28369	1	3.78009	28.817	0.838812	1.55422	18.2537	1	2.74954	37.5621	0.539945	3.65611	14.2053	0.882647	GCUGCGCUUGGAUUUCGUCCCC	experimental		mature miRNA	standard	MIMAT0001618	hsa-miR-191-3p	hsa-miR-191-3p
244	hsa-miR-191-5p	5824.52	197.963	1.96615e-166	7885.05	535.625	3.8328e-47	5303.03	342.613	8.13337e-68	5794.8	186.387	2.64644e-247	5824.96	412.786	1.78256e-33	2875.46	225.206	2.42715e-40	3826.84	224.59	2.6654e-113	2864.49	308.503	1.20466e-17	CAACGGAAUCCCAAAAGCAGCUG	experimental		mature miRNA	standard	MIMAT0000440	hsa-miR-191-5p	hsa-miR-191-5p
245	hsa-miR-192-3p	7.59477	15.3532	0.803523	28.1847	43.1121	0.624278	0.362774	14.4043	1	5.08304	8.42945	0.833494	5.32742	30.1222	0.766186	0.946906	16.862	1	1.97977	37.9601	0.540337	1.10175	13.1943	1	CUGCCAAUUCCAUAGGUCACAG	experimental		mature miRNA	standard	MIMAT0004543	hsa-miR-192-3p	hsa-miR-192-3p
246	hsa-miR-192-5p	196.484	34.1378	9.76827e-11	378.31	73.453	9.61023e-06	109.676	32.3685	0.0131967	161.134	56.6642	0.00405001	183.556	61.129	0.00699476	84.2538	34.7909	0.0011745	63.282	45.0542	0.0174774	25.809	24.3355	0.503125	CUGACCUAUGAAUUGACAGCC	experimental		mature miRNA	standard	MIMAT0000222	hsa-miR-192-5p	hsa-miR-192-5p
247	hsa-miR-193a-3p	6.18513	11.8292	0.575635	7.99046	13.6612	0.772515	32.3546	47.2946	0.629559	34.6502	15.1352	0.0433784	13.1849	32.7903	0.629842	5.28163	22.2032	0.776003	17.0591	42.2347	0.181558	7.53799	14.9708	0.736389	AACUGGCCUACAAAGUCCCAGU	experimental		mature miRNA	standard	MIMAT0000459	hsa-miR-193a-3p	hsa-miR-193a-3p
248	hsa-miR-193a-5p	6.13814	14.1363	0.816059	7.64169	11.4459	0.653335	11.4718	36.0897	0.85051	20.3058	12.0233	0.197264	1.45923	23.5759	0.892912	3.83704	17.9154	0.925697	6.11292	38.2647	0.524224	3.79742	15.3365	1	UGGGUCUUUGCGGGCGAGAUGA	experimental		mature miRNA	standard	MIMAT0004614	hsa-miR-193a-5p	hsa-miR-193a-5p
249	hsa-miR-193b-3p	17.436	5.39133	0.0708984	16.6415	19.6177	0.54532	13.2742	5.3109	0.142519	46.1705	15.8915	0.039961	0.00216812	14.029	1	0.0148283	9.79923	1	9.79553	10.1791	1.843e-06	0.0199018	7.37036	1	AACUGGCCCUCAAAGUCCCGCU	experimental		mature miRNA	standard	MIMAT0002819	hsa-miR-193b-3p	hsa-miR-193b-3p
250	hsa-miR-193b-5p	7.51734	6.88633	0.680702	0.539154	5.19432	0.926077	0.0114714	4.99102	1	0.0472507	4.36201	1	1.03391	21.7602	0.889858	2.32523	7.56919	0.767041	2.0892	14.6071	0.156181	0.0180624	6.9669	1	CGGGGUUUUGAGGGCGAGAUGA	experimental		mature miRNA	standard	MIMAT0004767	hsa-miR-193b-5p	hsa-miR-193b-5p
251	hsa-miR-194-3p	3.77088	10.7481	0.924226	1.54684	13.5436	0.932766	4.80208	19.1487	0.90908	2.50849	7.57528	1	4.03663	43.2324	0.875105	2.49497	17.9237	1	2.0107	36.5933	0.730949	8.07014	33.8698	0.92436	CCAGUGGGGCUGCUGUUAUCUG	experimental		mature miRNA	standard	MIMAT0004671	hsa-miR-194-3p	hsa-miR-194-3p
252	hsa-miR-194-5p	382.934	58.635	8.49198e-13	956.982	115.651	1.06713e-13	284.986	52.5674	1.51557e-06	291.307	35.3384	1.0851e-16	647.745	118.766	6.40227e-07	192.408	44.0844	8.70602e-08	189.383	46.0344	8.75693e-06	51.2931	23.7918	0.20133	UGUAACAGCAACUCCAUGUGGA	experimental		mature miRNA	standard	MIMAT0000460	hsa-miR-194-5p	hsa-miR-194-5p
253	hsa-miR-195-3p	13.6544	15.0641	0.616391	4.63385	11.6295	0.79474	0.0118702	11.4031	1	2.96824	8.77629	1	5.36627	37.7426	0.75561	3.74369	19.2778	0.978684	1.76214	39.5581	0.754022	0.0162685	13.3293	1	CCAAUAUUGGCUGUGCUGCUCC	experimental		mature miRNA	standard	MIMAT0004615	hsa-miR-195-3p	hsa-miR-195-3p
254	hsa-miR-195-5p	54.7234	25.0692	0.00520088	162.509	44.8387	0.00427119	228.782	38.9472	4.03351e-06	293.214	34.911	1.10441e-17	427.957	104.63	5.46019e-05	303.845	94.6871	0.000766367	61.0409	42.5986	0.0533629	557.807	132.181	0.000223158	UAGCAGCACAGAAAUAUUGGC	experimental		mature miRNA	standard	MIMAT0000461	hsa-miR-195-5p	hsa-miR-195-5p
255	hsa-miR-196a-3p	0.07169	10.7241	1	0.12786	9.20644	1	6.69347	25.4116	0.833793	0.973554	6.37908	1	0.411801	30.5066	1	2.5041	17.4818	1	0.747054	38.8844	0.888821	1.0663	12.3706	1	CGGCAACAAGAAACUGCCUGAG	experimental		mature miRNA	standard	MIMAT0004562	hsa-miR-196a-3p	hsa-miR-196a-3p
256	hsa-miR-196a-5p	5.81115	17.3265	1	2.82342	10.7201	1	2.44764	11.6664	0.875607	3.48009	7.79323	0.812094	6.02874	25.6679	0.689715	4.62458	17.8868	0.742931	0.868054	39.7434	0.942358	2.69353	13.2685	0.978292	UAGGUAGUUUCAUGUUGUUGGG	experimental		mature miRNA	standard	MIMAT0000226	hsa-miR-196a-5p	hsa-miR-196a-5p
257	hsa-miR-196b-3p	0.0625186	4.94812	1	0.0110576	5.77461	1	2.40753	3.55008	0.564602	0.0490174	2.66577	1	0.00158625	18.8386	1	11.7364	10.1457	0.182633	2.19389	13.712	0.0991275	1.17811	5.4981	0.917698	UCGACAGCACGACACUGCCUUC	experimental		mature miRNA	standard	MIMAT0009201	hsa-miR-196b-3p	hsa-miR-196b-3p
258	hsa-miR-196b-5p	0.0553018	4.60704	1	0.012767	9.69397	1	6.31012	9.81187	0.635828	4.45053	2.03144	0.380946	0.00194101	22.5213	1	9.19718	11.5142	0.36674	2.05679	18.1507	0.315907	1.05474	5.63266	0.931505	UAGGUAGUUUCCUGUUGUUGGG	experimental		mature miRNA	standard	MIMAT0001080	hsa-miR-196b-5p	hsa-miR-196b-5p
259	hsa-miR-197-3p	327.88	36.262	3.94361e-25	839.796	144.538	3.62015e-07	318.372	75.3571	0.00045052	237.118	34.0323	4.93717e-12	408.355	91.542	7.94947e-05	157.786	42.0315	2.53589e-06	273.919	72.5853	0.00068659	132.379	34.3036	0.00612738	UUCACCACCUUCUCCACCCAGC	experimental		mature miRNA	standard	MIMAT0000227	hsa-miR-197-3p	hsa-miR-197-3p
260	hsa-miR-197-5p	20.3835	17.0656	0.136744	7.51063	11.1387	0.724877	37.15	29.6901	0.404731	32.8101	12.3836	0.0228936	12.7923	28.4683	0.662428	32.8111	26.3394	0.129006	9.72476	39.3165	0.545462	31.1436	19.7169	0.30066	CGGGUAGAGAGGGCAGUGGGAGG	experimental		mature miRNA	standard	MIMAT0022691	hsa-miR-197-5p	hsa-miR-197-5p
261	hsa-miR-198	7.15819	12.8255	0.659354	5.62658	12.6019	0.906208	1.50711	11.5246	0.949015	5.2667	12.0723	0.819847	3.55231	23.1958	0.87397	4.68164	18.0899	0.753555	2.80825	39.7364	0.783125	8.38677	18.8986	0.830881	GGUCCAGAGGGGAGAUAGGUUC	experimental		mature miRNA	standard	MIMAT0000228	hsa-miR-198	hsa-miR-198
262	hsa-miR-199a-3p	17.4406	15.6175	0.220814	15.6972	14.9718	0.676424	31.7737	20.9967	0.334061	97.244	21.1409	1.27778e-05	10.1287	25.5081	0.608071	4.30521	15.8707	0.720323	24.1124	54.4758	0.1883	3.18132	14.3425	0.936758	ACAGUAGUCUGCACAUUGGUUA	experimental		mature miRNA	standard	MIMAT0000232,MIMAT0004563	hsa-miR-199a-3p	hsa-miR-199a-3p, hsa-miR-199b-3p
263	hsa-miR-199a-5p	3.98674	12.1967	0.861028	0.454251	8.40088	1	6.71915	18.3573	0.825225	24.996	13.9758	0.256989	0.861979	26.9003	0.905619	1.5161	18.1851	1	2.58401	39.2176	0.782194	3.07554	15.2234	1	CCCAGUGUUCAGACUACCUGUUC	experimental		mature miRNA	standard	MIMAT0000231	hsa-miR-199a-5p	hsa-miR-199a-5p
264	hsa-miR-199b-5p	0.0823253	3.65576	1	0.0109738	7.23808	1	0.0115759	6.40105	1	5.38842	3.51424	0.614388	0.00157952	19.4133	1	7.92084	13.1283	0.550884	1.41679	14.8562	0.273532	0.0226108	4.22682	1	CCCAGUGUUUAGACUAUCUGUUC	experimental		mature miRNA	standard	MIMAT0000263	hsa-miR-199b-5p	hsa-miR-199b-5p
265	hsa-miR-200a-3p	6.49641	11.8088	0.749805	1.26368	9.87417	1	11.2521	14.7451	0.717087	3.9102	11.4254	1	5.73732	24.0771	0.639377	5.4072	18.1887	0.808634	0.0282485	39.9594	1	2.89069	13.5644	1	UAACACUGUCUGGUAACGAUGU	experimental		mature miRNA	standard	MIMAT0000682	hsa-miR-200a-3p	hsa-miR-200a-3p
266	hsa-miR-200a-5p	1.01569	10.4532	1	3.83995	9.32444	1	0.0103153	11.4523	1	1.10034	5.81322	1	1.58228	23.5683	0.967403	0.0117825	15.5556	1	0.219451	40.2345	0.935488	6.4614	21.3127	0.832773	CAUCUUACCGGACAGUGCUGGA	experimental		mature miRNA	standard	MIMAT0001620	hsa-miR-200a-5p	hsa-miR-200a-5p
267	hsa-miR-200b-3p	36.2371	38.9824	0.452248	0.017049	6.17946	1	7.27995	7.31436	0.642271	46.9832	9.63054	0.00810323	2.1375	27.4426	0.893793	20.5328	16.2925	0.32719	0.000342299	14.5194	1	0.0288949	6.55804	1	UAAUACUGCCUGGUAAUGAUGA	experimental		mature miRNA	standard	MIMAT0000318	hsa-miR-200b-3p	hsa-miR-200b-3p
268	hsa-miR-200b-5p	0.102225	5.09134	1	0.0113393	3.91131	1	1.93361	7.7987	0.861558	0.0716536	1.80813	1	0.00129905	11.2049	1	0.019975	8.53769	1	0.000154691	15.6367	1	0.0209831	10.6701	1	CAUCUUACUGGGCAGCAUUGGA	experimental		mature miRNA	standard	MIMAT0004571	hsa-miR-200b-5p	hsa-miR-200b-5p
269	hsa-miR-200c-3p	55.2091	11.7328	2.45366e-09	104.001	29.7564	0.0185756	32.367	8.99477	0.0266577	35.5481	5.93467	1.13978e-07	40.851	19.7693	0.0459359	26.4481	14.5969	0.0133982	8.70393	22.768	0.191733	9.58304	7.24841	0.406765	UAAUACUGCCGGGUAAUGAUGGA	experimental		mature miRNA	standard	MIMAT0000617	hsa-miR-200c-3p	hsa-miR-200c-3p
270	hsa-miR-200c-5p	0.0966193	3.89193	1	0.0112022	4.59074	1	11.7948	12.0955	0.503763	0.0685044	2.68458	1	0.00132456	13.3436	1	0.0197001	8.86287	1	0.000162706	15.9692	1	0.0210498	4.47333	1	CGUCUUACCCAGCAGUGUUUGG	experimental		mature miRNA	standard	MIMAT0004657	hsa-miR-200c-5p	hsa-miR-200c-5p
271	hsa-miR-202-3p	0.0853061	10.4306	1	5.08009	9.60202	0.907612	0.0119715	12.4815	1	4.60661	11.6128	1	3.11754	23.6443	0.790662	1.80179	17.6855	1	0.0258515	44.2743	1	1.57762	16.167	0.976385	AGAGGUAUAGGGCAUGGGAA	experimental		mature miRNA	standard	MIMAT0002811	hsa-miR-202-3p	hsa-miR-202-3p
272	hsa-miR-202-5p	4.37163	14.1274	1	0.459154	7.83728	1	5.24727	12.917	0.820527	0.0552865	5.95869	1	1.16447	22.8928	0.974344	2.52695	17.6551	1	0.000197964	42.3808	1	2.74884	12.8053	0.980288	UUCCUAUGCAUAUACUUCUUUG	experimental		mature miRNA	standard	MIMAT0002810	hsa-miR-202-5p	hsa-miR-202-5p
273	hsa-miR-203a	2.1018	11.8578	1	3.23509	10.0951	0.989019	1.83039	11.9487	0.907129	1.989	7.29865	1	5.63186	27.132	0.688625	1.56742	16.7678	1	0.202222	41.5969	1	4.7843	14.1233	0.840669	GUGAAAUGUUUAGGACCACUAG	experimental		mature miRNA	standard	MIMAT0000264	hsa-miR-203a	hsa-miR-203a
274	hsa-miR-203b-3p	0.0711356	6.57299	1	0.0117386	3.99817	1	3.88014	6.61333	0.674297	0.0537881	2.07437	1	2.31067	19.2837	0.745119	6.53359	5.86539	0.323301	0.000210853	13.7891	1	0.0182981	6.66919	1	UUGAACUGUUAAGAACCACUGGA	experimental		mature miRNA	standard	MIMAT0019814	hsa-miR-203b-3p	hsa-miR-203b-3p
275	hsa-miR-203b-5p	0.0736361	4.29107	1	0.0156629	4.67596	1	2.34669	5.1916	0.746528	0.0656855	2.93814	1	0.00162833	19.5094	1	0.0176832	7.11235	1	0.000167794	14.4336	1	13.2837	4.5483	0.111537	UAGUGGUCCUAAACAUUUCACA	experimental		mature miRNA	standard	MIMAT0019813	hsa-miR-203b-5p	hsa-miR-203b-5p
276	hsa-miR-204-3p	7.04242	12.8026	0.688749	1.81762	8.59939	1	5.11906	13.1229	0.866858	8.75073	10.3619	0.605018	9.30314	25.6888	0.592025	9.0213	16.1866	0.51229	0.523909	40.6738	1	1.64902	12.7876	1	GCUGGGAAGGCAAAGGGACGU	experimental		mature miRNA	standard	MIMAT0022693	hsa-miR-204-3p	hsa-miR-204-3p
277	hsa-miR-204-5p	16.8011	29.6806	0.868012	0.923237	8.70146	1	0.83893	10.9245	1	0.554226	5.66435	1	3.83538	26.2469	0.778503	1.50598	16.1766	0.972672	0.154348	39.3458	1	2.41647	13.3566	1	UUCCCUUUGUCAUCCUAUGCCU	experimental		mature miRNA	standard	MIMAT0000265	hsa-miR-204-5p	hsa-miR-204-5p
278	hsa-miR-205-3p	27.0443	69.2969	0.99006	1.00598	9.31213	1	2.69466	21.1492	1	4.63497	11.3955	1	5.32106	24.3626	0.64069	2.05928	16.5205	0.874329	0.0316899	39.0306	1	15.1365	48.8111	0.806613	GAUUUCAGUGGAGUGAAGUUC	experimental		mature miRNA	standard	MIMAT0009197	hsa-miR-205-3p	hsa-miR-205-3p
279	hsa-miR-205-5p	2.59377	11.2696	1	5.1199	11.7583	0.930753	0.0116248	11.3792	1	2.21441	6.895	0.963289	6.15217	25.5973	0.769417	2.88708	17.7424	0.811375	2.5261	39.6352	0.864064	4.58931	17.6882	0.865363	UCCUUCAUUCCACCGGAGUCUG	experimental		mature miRNA	standard	MIMAT0000266	hsa-miR-205-5p	hsa-miR-205-5p
280	hsa-miR-206	12.8768	16.4896	0.509994	1.91425	9.02671	1	2.27263	13.818	1	9.08609	10.2113	0.598013	8.15325	23.9204	0.638202	11.4135	19.9725	0.523882	0.369531	39.6471	1	4.25462	13.0549	1	UGGAAUGUAAGGAAGUGUGUGG	experimental		mature miRNA	standard	MIMAT0000462	hsa-miR-206	hsa-miR-206
281	hsa-miR-208a-3p	3.97776	14.0385	1	0.297482	8.06834	1	3.1576	18.588	0.99529	2.22625	6.81842	1	2.55284	28.475	0.883061	1.74605	14.9718	0.942497	0.0587593	40.1091	1	2.99922	13.9	1	AUAAGACGAGCAAAAAGCUUGU	experimental		mature miRNA	standard	MIMAT0000241	hsa-miR-208a-3p	hsa-miR-208a-3p
282	hsa-miR-208a-5p	8.75335	8.34159	0.296005	10.7235	6.13745	0.694422	20.3245	7.75431	0.120713	33.0784	9.80569	0.00654138	9.89347	24.8846	0.637776	5.51427	6.98402	0.338254	0.626947	12.504	0.920696	13.3461	8.12111	0.314603	GAGCUUUUGGCCCGGGUUAUAC	experimental		mature miRNA	standard	MIMAT0026474	hsa-miR-208a-5p	hsa-miR-208a-5p
283	hsa-miR-208b-3p	0.119696	6.99904	1	0.0117319	4.51357	1	0.012282	6.71414	1	0.0812547	3.33494	1	0.00123027	15.9869	1	0.0207647	5.09999	1	0.000134303	12.589	1	0.0207979	5.52239	1	AUAAGACGAACAAAAGGUUUGU	experimental		mature miRNA	standard	MIMAT0004960	hsa-miR-208b-3p	hsa-miR-208b-3p
284	hsa-miR-208b-5p	0.093654	6.36512	1	0.0150303	3.93662	1	0.0120766	7.31378	1	0.0763461	3.83826	1	0.00145933	24.1548	1	0.0189436	10.2091	1	0.00014225	18.0516	1	2.86435	7.98708	0.868971	AAGCUUUUUGCUCGAAUUAUGU	experimental		mature miRNA	standard	MIMAT0026722	hsa-miR-208b-5p	hsa-miR-208b-5p
285	hsa-miR-210-3p	12.1587	13.8703	0.336364	10.2338	14.4569	0.756026	11.6985	13.9165	0.581801	11.6219	11.4131	0.409775	15.2259	47.278	0.726516	12.0458	18.8053	0.397189	5.95364	40.0819	0.641569	7.50611	14.3465	0.780571	CUGUGCGUGUGACAGCGGCUGA	experimental		mature miRNA	standard	MIMAT0000267	hsa-miR-210-3p	hsa-miR-210-3p
286	hsa-miR-210-5p	166.393	37.5269	3.66082e-06	5.36663	6.71304	0.715291	320.659	36.7869	3.47329e-13	0.0436979	3.99574	1	12.4774	20.6164	0.396498	0.0163238	8.57291	1	0.000322419	20.1297	1	112.37	111.184	0.457001	AGCCCCUGCCCACCGCACACUG	experimental		mature miRNA	standard	MIMAT0026475	hsa-miR-210-5p	hsa-miR-210-5p
287	hsa-miR-211-3p	9.00091	14.1945	0.64411	18.0228	31.2596	0.703124	0.575741	12.1199	1	8.90606	9.1765	0.551521	7.8894	25.7012	0.67308	6.84482	18.7566	0.692559	2.24011	40.5725	0.814242	2.157	11.4451	1	GCAGGGACAGCAAAGGGGUGC	experimental		mature miRNA	standard	MIMAT0022694	hsa-miR-211-3p	hsa-miR-211-3p
288	hsa-miR-211-5p	2.49524	13.5447	1	2.90334	8.32651	0.808688	1.78864	12.1367	1	0.795311	6.3008	1	5.27874	26.7828	0.749281	2.56071	16.5931	0.902434	0.925048	41.0094	0.910927	5.39038	13.2094	0.762003	UUCCCUUUGUCAUCCUUCGCCU	experimental		mature miRNA	standard	MIMAT0000268	hsa-miR-211-5p	hsa-miR-211-5p
289	hsa-miR-212-3p	6.26421	11.3205	0.549538	6.94735	12.7212	0.796872	7.50611	15.682	0.821352	14.7785	8.17521	0.121798	16.222	37.3807	0.615957	9.43955	18.997	0.465514	36.3613	42.1954	0.0360521	32.3895	33.5669	0.454855	UAACAGUCUCCAGUCACGGCC	experimental		mature miRNA	standard	MIMAT0000269	hsa-miR-212-3p	hsa-miR-212-3p
290	hsa-miR-212-5p	0.0501467	10.212	1	3.85087	9.0255	0.838861	0.0107061	11.8535	1	3.2376	7.58482	0.877655	3.38476	34.5355	0.841914	4.03395	14.8239	0.75418	1.95009	39.9719	0.879975	6.17518	12.5624	0.683927	ACCUUGGCUCUAGACUGCUUACU	experimental		mature miRNA	standard	MIMAT0022695	hsa-miR-212-5p	hsa-miR-212-5p
291	hsa-miR-214-3p	20.3273	13.2704	0.049468	23.7604	34.9836	0.621513	55.6193	20.9482	0.0628393	99.0346	19.1759	3.38071e-07	18.2993	30.9123	0.527782	19.6865	24.3264	0.306046	23.7358	49.0835	0.376104	22.8395	15.2832	0.348496	ACAGCAGGCACAGACAGGCAGU	experimental		mature miRNA	standard	MIMAT0000271	hsa-miR-214-3p	hsa-miR-214-3p
292	hsa-miR-214-5p	2.44719	11.7389	1	0.765732	8.86889	1	1.59034	12.064	1	0.264035	6.43205	1	4.43161	29.7663	0.760628	1.31953	16.1692	1	0.477012	40.635	1	8.87886	30.6928	0.817508	UGCCUGUCUACACUUGCUGUGC	experimental		mature miRNA	standard	MIMAT0004564	hsa-miR-214-5p	hsa-miR-214-5p
293	hsa-miR-215-3p	0.088717	6.68385	1	0.0123155	5.43945	1	0.0128117	5.97666	1	8.15058	3.79463	0.446213	8.24167	26.2645	0.490037	0.0178772	9.92808	1	0.000180291	16.4698	1	0.0166302	4.63857	1	UCUGUCAUUUCUUUAGGCCAAUA	experimental		mature miRNA	standard	MIMAT0026476	hsa-miR-215-3p	hsa-miR-215-3p
294	hsa-miR-215-5p	63.2653	21.6183	0.000411012	96.7081	23.248	0.00837515	72.1262	24.4782	0.0385579	141.811	23.4577	1.26909e-09	97.371	40.1393	0.0293043	66.7495	29.2722	0.00405758	19.9491	56.8411	0.590994	25.1661	26.874	0.499538	AUGACCUAUGAAUUGACAGAC	experimental		mature miRNA	standard	MIMAT0000272	hsa-miR-215-5p	hsa-miR-215-5p
295	hsa-miR-216a-3p	8.30425	22.1993	0.971924	0.19143	8.69721	1	4.77754	22.6367	0.883996	0.818559	6.31577	1	3.6053	24.1377	0.677299	2.61856	17.2549	1	0.27895	41.2476	1	1.88184	11.8845	1	UCACAGUGGUCUCUGGGAUUAU	experimental		mature miRNA	standard	MIMAT0022844	hsa-miR-216a-3p	hsa-miR-216a-3p
296	hsa-miR-216a-5p	7.59943	19.3559	1	0.640677	8.58003	1	0.44059	16.4983	1	0.0566775	6.24306	1	6.59197	43.1642	0.734713	3.34814	20.7165	1	0.0886618	35.903	1	2.98811	24.0178	0.969997	UAAUCUCAGCUGGCAACUGUGA	experimental		mature miRNA	standard	MIMAT0000273	hsa-miR-216a-5p	hsa-miR-216a-5p
297	hsa-miR-216b-3p	0.0979826	5.49719	1	0.0135787	4.72076	1	0.0128599	9.9024	1	0.0799443	3.06414	1	0.00141067	22.4963	1	10.69	12.7877	0.517993	0.000170655	15.3613	1	0.0230422	5.25922	1	ACACACUUACCCGUAGAGAUUCUA	experimental		mature miRNA	standard	MIMAT0026721	hsa-miR-216b-3p	hsa-miR-216b-3p
298	hsa-miR-216b-5p	0.075541	4.4713	1	0.0133782	3.38672	1	0.012846	5.12802	1	2.49381	3.8594	0.848632	16.3003	23.6884	0.20066	4.4758	5.90758	0.519274	0.000212735	12.5886	1	0.0176426	6.72166	1	AAAUCUCUGCAGGCAAAUGUGA	experimental		mature miRNA	standard	MIMAT0004959	hsa-miR-216b-5p	hsa-miR-216b-5p
299	hsa-miR-217	0.0789463	10.2504	1	3.51358	9.32206	0.711445	0.45373	11.7232	1	1.85424	6.32955	0.976649	2.46058	24.4662	0.810091	0.851197	18.0537	1	0.684796	38.7344	0.940633	0.998099	11.9544	1	UACUGCAUCAGGAACUGAUUGGA	experimental		mature miRNA	standard	MIMAT0000274	hsa-miR-217	hsa-miR-217
300	hsa-miR-218-1-3p	1.69845	10.8251	1	4.56261	16.2213	0.797746	1.11372	17.7027	1	1.40437	7.04511	1	2.67713	25.6514	0.732184	1.9202	18.9263	1	3.61745	41.2159	0.608007	0.0111471	14.505	1	AUGGUUCCGUCAAGCACCAUGG	experimental		mature miRNA	standard	MIMAT0004565	hsa-miR-218-1-3p	hsa-miR-218-1-3p
301	hsa-miR-218-2-3p	40.869	78.9925	0.87919	2.49073	8.87389	0.808397	0.316366	12.3558	1	2.81257	7.39798	0.89908	6.95042	31.0078	0.582599	1.57291	16.9841	1	7.78913	43.4352	0.426258	0.0907977	13.7425	1	CAUGGUUCUGUCAAGCACCGCG	experimental		mature miRNA	standard	MIMAT0004566	hsa-miR-218-2-3p	hsa-miR-218-2-3p
302	hsa-miR-218-5p	2.35741	12.5554	1	3.05442	8.53745	0.752765	9.83141	18.9506	0.73361	4.45911	7.69692	0.749046	7.00711	25.1598	0.652444	2.25291	17.7226	0.980227	0.673076	39.3965	0.977968	1.21175	12.3093	1	UUGUGCUUGAUCUAACCAUGU	experimental		mature miRNA	standard	MIMAT0000275	hsa-miR-218-5p	hsa-miR-218-5p
303	hsa-miR-219a-1-3p	1.75042	10.4502	0.982494	2.93694	9.91059	0.736613	12.6801	39.1597	0.808134	2.34908	6.89499	1	3.40978	28.2626	0.802637	0.802745	17.9886	1	3.43535	41.882	0.71789	3.51175	20.066	1	AGAGUUGAGUCUGGACGUCCCG	experimental		mature miRNA	standard	MIMAT0004567	hsa-miR-219a-1-3p	hsa-miR-219a-1-3p
304	hsa-miR-219a-2-3p	0.0789183	11.4802	1	4.39677	14.2264	0.788364	1.16582	11.7053	1	0.0410107	6.30718	1	4.43614	25.6477	0.621828	2.8307	17.8417	1	0.0947612	40.0986	1	0.514563	12.591	1	AGAAUUGUGGCUGGACAUCUGU	experimental		mature miRNA	standard	MIMAT0004675	hsa-miR-219a-2-3p	hsa-miR-219a-2-3p
305	hsa-miR-219a-5p	1.29215	11.227	1	7.81745	13.6303	0.553321	3.37239	13.9124	0.831844	2.49043	7.35671	0.905709	3.42542	29.0458	0.754827	3.35487	17.9304	0.804319	7.10267	44.4039	0.587835	1.34498	11.9439	1	UGAUUGUCCAAACGCAAUUCU	experimental		mature miRNA	standard	MIMAT0000276	hsa-miR-219a-5p	hsa-miR-219a-5p
306	hsa-miR-219b-3p	0.0627101	4.98556	1	29.8149	9.73591	0.0143203	0.0104097	6.56025	1	3.37651	3.1803	0.530422	8.76836	20.0015	0.38093	4.69733	13.0636	0.607182	20.1694	24.9303	0.000756364	0.0114483	8.54835	1	AGAAUUGCGUUUGGACAAUCAGU	experimental		mature miRNA	standard	MIMAT0019748	hsa-miR-219b-3p	hsa-miR-219b-3p
307	hsa-miR-219b-5p	0.0837447	3.92713	1	29.3308	12.3765	0.0504729	0.0100228	5.55614	1	0.0436316	2.83252	1	0.00138676	15.4506	1	5.6903	9.0381	0.432325	17.1168	18.1798	1.21353e-06	0.0143154	4.17893	1	AGAUGUCCAGCCACAAUUCUCG	experimental		mature miRNA	standard	MIMAT0019747	hsa-miR-219b-5p	hsa-miR-219b-5p
308	hsa-miR-221-3p	793.013	93.8202	3.12271e-17	999.684	89.475	5.19925e-22	599.124	72.943	7.458e-14	1338.88	70.552	3.34596e-67	743.164	124.466	9.37477e-09	919.92	89.0878	1.15453e-21	1557.69	123.669	1.33366e-23	954.186	133.82	1.48478e-09	AGCUACAUUGUCUGCUGGGUUUC	experimental		mature miRNA	standard	MIMAT0000278	hsa-miR-221-3p	hsa-miR-221-3p
309	hsa-miR-221-5p	30.441	18.53	0.0302183	60.7805	20.4686	0.0542455	14.9093	14.7296	0.527757	42.3244	16.4924	0.0194797	59.2165	36.3005	0.109506	45.7224	24.636	0.0153895	35.7779	46.1091	0.207013	16.5114	16.8516	0.513594	ACCUGGCAUACAAUGUAGAUUU	experimental		mature miRNA	standard	MIMAT0004568	hsa-miR-221-5p	hsa-miR-221-5p
310	hsa-miR-222-3p	1540.53	247.016	4.56162e-10	1874.71	128.148	1.8426e-32	1101.91	92.9374	4.40613e-24	1984.07	113.906	1.09736e-48	1504.47	212.783	1.33672e-10	1756.09	128.103	4.74297e-38	2191.65	320.517	1.00505e-09	1956.49	189.787	2.09225e-20	AGCUACAUCUGGCUACUGGGU	experimental		mature miRNA	standard	MIMAT0000279	hsa-miR-222-3p	hsa-miR-222-3p
311	hsa-miR-222-5p	3.61262	15.6033	0.90542	4.70384	10.3416	0.797915	2.63292	15.4185	0.960468	8.41187	8.4949	0.497039	9.38001	23.4935	0.580658	11.6968	18.9266	0.444383	3.3576	41.2603	0.83727	7.75425	17.6436	0.802678	CUCAGUAGCCAGUGUAGAUCCU	experimental		mature miRNA	standard	MIMAT0004569	hsa-miR-222-5p	hsa-miR-222-5p
312	hsa-miR-223-3p	29.8637	23.3973	0.132586	260.548	49.9842	9.75221e-05	12.1708	15.5312	0.683215	15.7591	9.12386	0.167786	159.306	53.5374	0.0108798	23.3573	22.1326	0.188562	6.28591	47.1764	0.759579	6.88527	20.2663	0.803655	UGUCAGUUUGUCAAAUACCCCA	experimental		mature miRNA	standard	MIMAT0000280	hsa-miR-223-3p	hsa-miR-223-3p
313	hsa-miR-223-5p	4.15169	13.9711	1	3.114	9.83197	0.933672	3.39777	13.6323	0.953796	3.79572	7.85999	0.830547	6.97507	27.9689	0.639506	0.736711	16.2964	1	0.000243776	39.0356	1	2.21436	12.089	0.87151	CGUGUAUUUGACAAGCUGAGUU	experimental		mature miRNA	standard	MIMAT0004570	hsa-miR-223-5p	hsa-miR-223-5p
314	hsa-miR-224-3p	2.58616	10.7662	1	0.73341	8.3308	0.970485	2.27076	12.1241	1	4.82727	8.81111	0.909051	3.84067	25.2887	0.715124	4.25347	16.7936	0.954932	0.000293869	38.8358	1	1.77199	11.833	1	AAAAUGGUGCCCUAGUGACUACA	experimental		mature miRNA	standard	MIMAT0009198	hsa-miR-224-3p	hsa-miR-224-3p
315	hsa-miR-224-5p	2.60299	11.3628	1	0.189665	7.57597	1	6.79857	15.4353	0.879956	5.93883	11.848	0.794557	8.10274	22.4566	0.471616	0.0171802	14.6479	1	0.508297	43.5781	0.94435	0.0166636	12.066	1	CAAGUCACUAGUGGUUCCGUU	experimental		mature miRNA	standard	MIMAT0000281	hsa-miR-224-5p	hsa-miR-224-5p
316	hsa-miR-296-3p	6.21065	15.2803	0.825685	1.17867	10.3484	0.984347	4.10979	14.158	0.852235	0.498402	6.18634	1	2.76166	24.9819	0.780297	5.81977	18.4865	0.641852	1.3347	41.8462	1	1.87827	17.0596	0.984028	GAGGGUUGGGUGGAGGCUCUCC	experimental		mature miRNA	standard	MIMAT0004679	hsa-miR-296-3p	hsa-miR-296-3p
317	hsa-miR-296-5p	6.45247	10.601	0.562134	11.2812	8.37748	0.443909	9.8053	13.3786	0.541029	5.66544	9.8727	0.695379	24.2318	26.8759	0.286507	8.00087	16.9208	0.486922	4.82431	43.8071	0.826367	9.5284	13.9431	0.674511	AGGGCCCCCCCUCAAUCCUGU	experimental		mature miRNA	standard	MIMAT0000690	hsa-miR-296-5p	hsa-miR-296-5p
318	hsa-miR-297	12.258	14.3186	0.408272	9.97079	23.3363	0.825897	1.49895	11.6123	0.965671	14.1358	10.6928	0.272336	12.504	28.1116	0.550807	16.7762	16.8403	0.187751	2.06901	39.4268	0.992576	3.3924	11.4401	0.87866	AUGUAUGUGUGCAUGUGCAUG	experimental		mature miRNA	standard	MIMAT0004450	hsa-miR-297	hsa-miR-297
319	hsa-miR-298	10.0637	25.2976	0.947458	1.23315	8.72974	1	0.634195	11.7282	1	0.0405513	5.43043	1	2.99608	25.2506	0.715909	2.31099	16.4273	0.949033	0.541423	42.9591	1	0.277464	11.0893	1	AGCAGAAGCAGGGAGGUUCUCCCA	experimental		mature miRNA	standard	MIMAT0004901	hsa-miR-298	hsa-miR-298
320	hsa-miR-299-3p	3.97368	14.434	0.895466	2.30608	9.5068	0.889694	3.28108	13.9557	0.902758	3.09476	6.50233	0.766712	16.7725	43.7854	0.607756	8.04708	17.347	0.602612	0.589358	39.4471	1	4.98036	12.2634	0.790467	UAUGUGGGAUGGUAAACCGCUU	experimental		mature miRNA	standard	MIMAT0000687	hsa-miR-299-3p	hsa-miR-299-3p
321	hsa-miR-299-5p	0.744116	13.1274	1	4.00721	10.809	0.8708	7.18826	15.8589	0.764518	6.69128	7.98682	0.564216	10.7008	29.863	0.569936	4.21538	14.3817	0.703544	4.45357	39.9476	0.492556	1.99664	12.3982	0.963924	UGGUUUACCGUCCCACAUACAU	experimental		mature miRNA	standard	MIMAT0002890	hsa-miR-299-5p	hsa-miR-299-5p
322	hsa-miR-300	23.8177	57.9413	0.800007	4.05809	10.6532	0.822348	1.89406	11.9032	1	5.39307	7.36702	0.716115	6.01988	21.2638	0.588826	0.0137269	17.6443	1	0.762849	38.0762	0.821756	2.91776	13.8653	0.942973	UAUACAAGGGCAGACUCUCUCU	experimental		mature miRNA	standard	MIMAT0004903	hsa-miR-300	hsa-miR-300
323	hsa-miR-301a-3p	0.257012	10.1897	1	6.47692	12.7097	0.729161	0.633041	13.5256	1	2.36017	7.22164	0.894817	5.9745	22.7686	0.647126	10.0546	18.9617	0.445467	4.67959	38.2564	0.462249	4.72427	13.1118	0.811144	CAGUGCAAUAGUAUUGUCAAAGC	experimental		mature miRNA	standard	MIMAT0000688	hsa-miR-301a-3p	hsa-miR-301a-3p
324	hsa-miR-301a-5p	3.96116	12.1836	0.8735	2.22291	9.25948	0.881312	3.84011	17.8273	0.981836	6.01341	8.74757	0.740755	16.0524	37.7533	0.588111	0.231172	16.9398	1	0.236379	39.932	0.9051	0.0151802	11.9519	1	GCUCUGACUUUAUUGCACUACU	experimental		mature miRNA	standard	MIMAT0022696	hsa-miR-301a-5p	hsa-miR-301a-5p
325	hsa-miR-301b	0.0955248	7.86353	1	0.393083	3.32889	0.917962	0.0112732	6.93863	1	7.08799	3.79523	0.466438	0.00145892	15.037	1	0.0144973	15.0758	1	1.95353	10.6163	0.0378716	0.0170936	6.44081	1	CAGUGCAAUGAUAUUGUCAAAGC	experimental		mature miRNA	standard	MIMAT0004958	hsa-miR-301b	hsa-miR-301b
326	hsa-miR-302a-3p	3.96786	14.2876	1	2.83773	8.20003	0.812989	8.54102	37.3337	0.912607	1.69981	6.67769	1	2.69577	22.0438	0.776878	2.12541	18.0592	1	0.660909	38.3451	0.816494	1.2199	12.7938	1	UAAGUGCUUCCAUGUUUUGGUGA	experimental		mature miRNA	standard	MIMAT0000684	hsa-miR-302a-3p	hsa-miR-302a-3p
327	hsa-miR-302a-5p	18.6667	39.7373	0.998355	2.08917	8.26827	0.754196	5.73844	16.9205	0.748867	1.85145	7.22207	1	3.32564	26.0779	0.704331	0.0123043	15.7	1	0.370693	40.3312	0.946202	0.66166	12.9993	1	ACUUAAACGUGGAUGUACUUGCU	experimental		mature miRNA	standard	MIMAT0000683	hsa-miR-302a-5p	hsa-miR-302a-5p
328	hsa-miR-302b-3p	13.0464	6.40858	0.48774	0.00901748	2.81644	1	0.0117318	7.57395	1	0.0592211	2.89962	1	0.973629	17.4863	0.855946	0.0179122	10.2255	1	0.106893	17.9261	0.891837	0.0209662	5.88962	1	UAAGUGCUUCCAUGUUUUAGUAG	experimental		mature miRNA	standard	MIMAT0000715	hsa-miR-302b-3p	hsa-miR-302b-3p
329	hsa-miR-302b-5p	198.064	27.3192	8.61245e-09	0.0105402	5.40816	1	0.0140092	6.67556	1	0.07336	1.98016	1	0.0725259	11.9939	0.980314	0.0216048	14.3729	1	0.0210217	11.222	0.957336	0.0267778	8.35813	1	ACUUUAACAUGGAAGUGCUUUC	experimental		mature miRNA	standard	MIMAT0000714	hsa-miR-302b-5p	hsa-miR-302b-5p
330	hsa-miR-302c-3p	0.0838672	6.19168	1	1.64718	6.24015	0.866784	0.0114822	6.97724	1	0.0520361	4.02217	1	2.92343	16.0678	0.624121	0.015435	6.33955	1	0.000181426	7.70257	1	0.2645	6.24279	0.972772	UAAGUGCUUCCAUGUUUCAGUGG	experimental		mature miRNA	standard	MIMAT0000717	hsa-miR-302c-3p	hsa-miR-302c-3p
331	hsa-miR-302c-5p	0.0640276	5.00685	1	6.51924	12.2859	0.71864	0.00993696	8.39034	1	0.564988	3.15824	0.943541	2.32399	15.2658	0.708935	0.0110407	7.21278	1	1.1855	15.9427	0.403023	3.52326	9.47314	0.733019	UUUAACAUGGGGGUACCUGCUG	experimental		mature miRNA	standard	MIMAT0000716	hsa-miR-302c-5p	hsa-miR-302c-5p
332	hsa-miR-302d-3p	5.8024	9.30618	0.819334	3.28214	6.47973	0.653819	2.92445	6.76178	0.749924	0.040725	2.58224	1	2.67123	13.3404	0.602193	0.0143588	11.0156	0.999329	0.249376	9.48253	0.707486	0.0149239	8.07206	1	UAAGUGCUUCCAUGUUUGAGUGU	experimental		mature miRNA	standard	MIMAT0000718	hsa-miR-302d-3p	hsa-miR-302d-3p
333	hsa-miR-302d-5p	9.28221	14.6233	0.806721	0.0111046	4.09898	1	16.1711	33.5642	0.763706	0.0597481	3.57364	1	2.21339	9.23353	0.532358	0.0203114	9.03872	1	0.000194385	17.7257	1	0.0216189	6.99046	1	ACUUUAACAUGGAGGCACUUGC	experimental		mature miRNA	standard	MIMAT0004685	hsa-miR-302d-5p	hsa-miR-302d-5p
334	hsa-miR-302e	0.0793058	6.36342	1	7.48285	3.06714	0.0763422	2.81101	9.14959	0.820951	0.0435077	2.28335	1	6.79289	19.203	0.391363	0.0148533	9.40825	1	0.000220694	15.9404	1	0.0116511	6.82252	1	UAAGUGCUUCCAUGCUU	experimental		mature miRNA	standard	MIMAT0005931	hsa-miR-302e	hsa-miR-302e
335	hsa-miR-302f	0.0963086	6.30136	1	1.0878	3.14729	0.808415	3.005	5.69134	0.719107	0.0619364	2.39452	1	0.00137635	22.3539	1	0.0180221	8.25334	1	0.000188826	22.6872	1	0.0168651	5.23658	1	UAAUUGCUUCCAUGUUU	experimental		mature miRNA	standard	MIMAT0005932	hsa-miR-302f	hsa-miR-302f
336	hsa-miR-320a	815.191	64.5858	1.74206e-37	1073.87	131.201	5.89919e-14	445.773	57.607	1.12379e-10	518.153	56.9645	5.21382e-20	419.234	85.5189	6.66129e-06	244.037	45.719	1.11344e-10	340.43	60.1547	1.69597e-09	221.704	73.3365	0.0193175	AAAAGCUGGGUUGAGAGGGCGA	experimental		mature miRNA	standard	MIMAT0000510	hsa-miR-320a	hsa-miR-320a
337	hsa-miR-320b	674.213	46.2001	5.87225e-54	837.039	66.526	7.89545e-34	346.365	49.7645	7.2333e-10	360.027	30.3541	4.59019e-33	356.21	97.917	0.000648691	161.406	27.5188	4.98747e-13	269.139	28.4019	1.80459e-30	126.773	25.1998	0.00103885	AAAAGCUGGGUUGAGAGGGCAA	experimental		mature miRNA	standard	MIMAT0005792	hsa-miR-320b	hsa-miR-320b
338	hsa-miR-320c	709.046	38.0977	3.78331e-86	898.867	99.5257	2.41572e-18	344.079	43.0079	1.58476e-12	367.183	33.836	5.76588e-28	360.037	72.2882	3.07673e-06	170.156	44.1774	2.41078e-06	289.84	30.4721	5.27024e-30	123.306	26.4172	0.00249114	AAAAGCUGGGUUGAGAGGGU	experimental		mature miRNA	standard	MIMAT0005793	hsa-miR-320c	hsa-miR-320c
339	hsa-miR-320d	679.032	46.1247	8.50606e-55	873.899	95.5477	1.13752e-18	391.262	61.5575	1.35561e-08	386.605	40.4718	5.41145e-22	343.326	40.8135	3.72684e-15	155.894	21.4703	2.86274e-19	258.929	34.2654	3.81001e-20	98.9598	13.9845	7.54748e-06	AAAAGCUGGGUUGAGAGGA	experimental		mature miRNA	standard	MIMAT0006764	hsa-miR-320d	hsa-miR-320d
340	hsa-miR-320e	526.954	37.823	8.30118e-51	807.98	95.6134	6.35381e-16	297.004	36.477	1.21933e-12	341.278	22.1349	1.30782e-54	287.664	47.1661	1.80383e-08	162.731	21.5035	1.47589e-20	230.128	30.8468	1.43362e-20	86.3792	16.1901	0.000796319	AAAGCUGGGUUGAGAAGG	experimental		mature miRNA	standard	MIMAT0015072	hsa-miR-320e	hsa-miR-320e
341	hsa-miR-323a-3p	2.14566	12.3868	1	0.877734	8.47846	1	3.78814	20.8509	0.895615	6.55673	9.36967	0.700773	0.448603	26.0506	1	2.56411	19.0345	1	1.24988	38.9882	0.807523	1.01061	12.9799	1	CACAUUACACGGUCGACCUCU	experimental		mature miRNA	standard	MIMAT0000755	hsa-miR-323a-3p	hsa-miR-323a-3p
342	hsa-miR-323a-5p	0.334147	10.2529	1	0.00790816	8.92143	1	0.791801	12.9102	0.946248	0.0521717	5.77263	1	0.557097	24.5695	1	0.0149003	16.2303	1	0.372396	40.5249	0.91327	0.141698	11.8398	1	AGGUGGUCCGUGGCGCGUUCGC	experimental		mature miRNA	standard	MIMAT0004696	hsa-miR-323a-5p	hsa-miR-323a-5p
343	hsa-miR-323b-3p	1.13868	4.99283	0.958157	0.0131305	5.93394	1	0.0127139	5.15045	1	12.2958	5.37933	0.402553	0.0018254	15.9501	1	0.0166621	10.345	1	0.439571	27.1289	0.801767	1.39519	5.17947	0.905377	CCCAAUACACGGUCGACCUCUU	experimental		mature miRNA	standard	MIMAT0015050	hsa-miR-323b-3p	hsa-miR-323b-3p
344	hsa-miR-323b-5p	0.0983882	5.0933	1	0.0112461	6.49982	1	6.59245	5.58869	0.417496	0.0695021	3.35827	1	0.0013163	18.9843	1	0.0197882	10.1038	1	0.000160083	18.3793	1	0.0210283	4.88344	1	AGGUUGUCCGUGGUGAGUUCGCA	experimental		mature miRNA	standard	MIMAT0001630	hsa-miR-323b-5p	hsa-miR-323b-5p
345	hsa-miR-324-3p	25.6902	13.7501	0.10309	20.9186	17.9932	0.331714	14.2876	13.2508	0.563321	10.2548	8.04749	0.393853	12.9274	25.7802	0.46231	11.9485	21.4852	0.513777	7.32549	40.0621	0.549501	2.045	13.0214	1	ACUGCCCCAGGUGCUGCUGG	experimental		mature miRNA	standard	MIMAT0000762	hsa-miR-324-3p	hsa-miR-324-3p
346	hsa-miR-324-5p	30.794	20.7643	0.0624743	63.1805	28.2382	0.119231	10.6738	15.948	0.700336	21.5631	11.2603	0.102876	29.8822	29.6922	0.295334	16.2676	21.2203	0.300422	12.0734	41.692	0.430768	16.091	35.5727	0.773545	CGCAUCCCCUAGGGCAUUGGUGU	experimental		mature miRNA	standard	MIMAT0000761	hsa-miR-324-5p	hsa-miR-324-5p
347	hsa-miR-325	0.0818156	10.6695	1	0.804865	8.52328	1	3.55882	15.9631	0.980172	0.0401184	6.60125	1	1.45117	25.8068	0.89628	0.0131154	16.6863	1	0.105365	39.758	0.949966	0.52357	13.6133	1	CCUAGUAGGUGUCCAGUAAGUGU	experimental		mature miRNA	standard	MIMAT0000771	hsa-miR-325	hsa-miR-325
348	hsa-miR-326	7.39925	12.3555	0.597157	2.89742	10.3136	0.862303	15.1448	17.5644	0.543879	4.60684	7.87984	0.701373	10.3334	24.2464	0.576908	3.07262	18.1107	0.891332	5.35315	61.6374	0.69213	5.27428	19.6701	0.857778	CCUCUGGGCCCUUCCUCCAG	experimental		mature miRNA	standard	MIMAT0000756	hsa-miR-326	hsa-miR-326
349	hsa-miR-328-3p	57.226	23.7928	0.00307085	105.479	39.2084	0.0364921	32.2849	13.2103	0.146432	27.9412	11.1457	0.0332472	31.2227	32.2444	0.288132	12.7381	20.5308	0.413438	9.98867	42.3434	0.533969	6.70972	16.8031	0.834274	CUGGCCCUCUCUGCCCUUCCGU	experimental		mature miRNA	standard	MIMAT0000752	hsa-miR-328-3p	hsa-miR-328-3p
350	hsa-miR-328-5p	203.079	18.7405	1.43842e-37	305.935	104.48	0.00943515	291.84	31.9722	1.50507e-15	205.228	25.6273	3.83862e-16	270.553	49.703	4.84763e-07	423.03	57.2155	1.80419e-16	144.258	31.1936	3.10846e-10	306.336	61.9091	0.000177446	GGGGGGGCAGGAGGGGCUCAGGG	experimental		mature miRNA	standard	MIMAT0026486	hsa-miR-328-5p	hsa-miR-328-5p
351	hsa-miR-329-3p	0.0473378	10.2543	1	5.1286	17.9188	0.827279	23.3101	29.1024	0.539692	23.2431	13.0319	0.156292	3.29436	25.5554	0.8553	2.71772	18.0014	0.828637	2.3149	42.8225	0.806695	0.466367	11.5242	0.989946	AACACACCUGGUUAACCUCUUU	experimental		mature miRNA	standard	MIMAT0001629	hsa-miR-329-3p	hsa-miR-329-3p
352	hsa-miR-329-5p	4.1249	11.4334	0.746574	11.5373	18.6465	0.781264	10.1215	4.053	0.124872	4.7285	2.36748	0.238117	16.55	38.9105	0.624704	24.2281	12.8645	0.013378	0.287596	11.6933	0.845665	49.0589	58.952	0.554523	GAGGUUUUCUGGGUUUCUGUUUC	experimental		mature miRNA	standard	MIMAT0026555	hsa-miR-329-5p	hsa-miR-329-5p
353	hsa-miR-330-3p	15.8557	13.7087	0.135281	44.1566	19.9922	0.156916	36.6503	50.4367	0.572948	17.0204	10.1228	0.154211	24.4138	26.337	0.360367	28.8635	23.2285	0.0959659	12.7128	47.8896	0.54922	19.1186	15.5913	0.378012	GCAAAGCACACGGCCUGCAGAGA	experimental		mature miRNA	standard	MIMAT0000751	hsa-miR-330-3p	hsa-miR-330-3p
354	hsa-miR-330-5p	19.8572	48.6979	0.950171	1.31668	8.62616	0.987508	0.692611	9.55444	1	0.0447943	5.90031	1	1.01616	25.4819	0.956614	3.9138	16.4562	0.835786	0.369139	40.1773	1	21.8123	51.029	0.73693	UCUCUGGGCCUGUGUCUUAGGC	experimental		mature miRNA	standard	MIMAT0004693	hsa-miR-330-5p	hsa-miR-330-5p
355	hsa-miR-331-3p	44.3439	22.0449	0.0126462	116.536	34.5799	0.0121318	31.6058	14.4511	0.163966	36.4003	11.7688	0.00437813	56.5939	35.0108	0.110105	31.2684	22.5097	0.0514662	19.7553	40.0734	0.29938	18.8561	34.7388	0.693936	GCCCCUGGGCCUAUCCUAGAA	experimental		mature miRNA	standard	MIMAT0000760	hsa-miR-331-3p	hsa-miR-331-3p
356	hsa-miR-331-5p	10.8706	17.6065	0.697456	2.61086	8.64288	0.841036	6.13942	14.1865	0.752352	2.20481	7.65285	1	2.90772	28.1233	0.876888	8.11219	18.7421	0.635636	0.583148	39.6778	1	0.024382	11.0842	1	CUAGGUAUGGUCCCAGGGAUCC	experimental		mature miRNA	standard	MIMAT0004700	hsa-miR-331-5p	hsa-miR-331-5p
357	hsa-miR-335-3p	8.11673	15.8095	0.692138	9.71041	12.8631	0.7472	18.177	24.3177	0.631401	3.53427	9.69448	0.974081	7.33335	25.7829	0.630649	13.6838	16.9553	0.378884	0.0832682	46.5596	1	20.5261	36.5774	0.6739	UUUUUCAUUAUUGCUCCUGACC	experimental		mature miRNA	standard	MIMAT0004703	hsa-miR-335-3p	hsa-miR-335-3p
358	hsa-miR-335-5p	91.959	23.9399	5.91586e-07	248.882	46.8594	3.7862e-05	238.628	34.4683	4.82784e-08	198.31	25.9558	2.30927e-13	188.856	49.4767	0.000721658	92.7698	33.4768	0.00158238	40.1539	46.3479	0.170499	57.2899	22.542	0.079392	UCAAGAGCAAUAACGAAAAAUGU	experimental		mature miRNA	standard	MIMAT0000765	hsa-miR-335-5p	hsa-miR-335-5p
359	hsa-miR-337-3p	0.0405474	11.1044	1	5.31912	11.8527	0.929787	13.8335	12.4315	0.421271	20.8429	10.9092	0.150133	4.57884	27.2716	0.796369	2.63489	14.4417	0.820811	0.177081	39.7582	1	7.94714	16.5779	0.703336	CUCCUAUAUGAUGCCUUUCUUC	experimental		mature miRNA	standard	MIMAT0000754	hsa-miR-337-3p	hsa-miR-337-3p
360	hsa-miR-337-5p	25.7192	60.2948	0.950804	2.15837	8.7022	0.979664	5.09157	10.9248	0.683493	8.50586	7.54423	0.465758	6.63985	25.7809	0.658365	1.24169	14.6467	0.934573	0.250052	40.2258	1	3.9775	12.5472	0.81574	GAACGGCUUCAUACAGGAGUU	experimental		mature miRNA	standard	MIMAT0004695	hsa-miR-337-5p	hsa-miR-337-5p
361	hsa-miR-338-3p	6.40536	18.1429	0.889914	14.5258	20.2041	0.70864	7.53311	21.311	0.828631	8.52104	8.75503	0.616022	6.44006	30.6019	0.849056	6.9662	18.1177	0.668523	0.0956405	42.9084	1	4.31292	13.3424	0.86207	UCCAGCAUCAGUGAUUUUGUUG	experimental		mature miRNA	standard	MIMAT0000763	hsa-miR-338-3p	hsa-miR-338-3p
362	hsa-miR-338-5p	4.39566	15.4103	0.825246	0.0241447	8.63711	1	8.69545	15.4323	0.79232	4.01917	8.52819	0.873409	9.91941	27.0595	0.639287	6.66757	16.655	0.592709	0.103385	40.3931	1	2.03073	10.8155	0.932659	AACAAUAUCCUGGUGCUGAGUG	experimental		mature miRNA	standard	MIMAT0004701	hsa-miR-338-5p	hsa-miR-338-5p
363	hsa-miR-339-3p	30.9584	22.0049	0.0756935	70.216	33.4062	0.142816	18.9462	28.9134	0.651791	18.4188	9.70609	0.101647	68.8524	37.3344	0.0837514	20.847	20.5889	0.169012	4.3217	43.6135	0.853362	18.0947	31.603	0.675508	UGAGCGCCUCGACGACAGAGCCG	experimental		mature miRNA	standard	MIMAT0004702	hsa-miR-339-3p	hsa-miR-339-3p
364	hsa-miR-339-5p	10.6909	16.8759	0.556133	59.5738	20.1953	0.0525979	7.03844	20.9582	0.790209	8.87734	10.252	0.508832	24.8686	31.1273	0.35384	9.69321	19.0158	0.476427	2.5474	38.9934	0.936733	3.83706	13.6186	0.850509	UCCCUGUCCUCCAGGAGCUCACG	experimental		mature miRNA	standard	MIMAT0000764	hsa-miR-339-5p	hsa-miR-339-5p
365	hsa-miR-340-3p	1.94877	10.2663	1	15.6247	12.257	0.5338	1.80121	11.353	0.934911	3.90077	7.15763	0.828816	5.7957	24.9827	0.767182	5.59909	14.4968	0.669812	0.0726693	42.0855	1	2.02771	14.7602	0.991687	UCCGUCUCAGUUACUUUAUAGC	experimental		mature miRNA	standard	MIMAT0000750	hsa-miR-340-3p	hsa-miR-340-3p
366	hsa-miR-340-5p	40.0513	24.0439	0.0238845	70.4214	22.686	0.0470754	66.8129	54.985	0.352591	52.1086	15.5381	0.00169947	152.567	42.7724	0.00257587	51.9225	24.6732	0.00541617	6.90851	40.825	0.85276	15.7949	14.9305	0.443719	UUAUAAAGCAAUGAGACUGAUU	experimental		mature miRNA	standard	MIMAT0004692	hsa-miR-340-5p	hsa-miR-340-5p
367	hsa-miR-342-3p	17297.7	462.241	1.67383e-201	16743.6	454.646	1.54298e-178	13045.7	581.286	4.23406e-70	12298.5	383.459	8.0585e-173	9694.94	833.609	1.52636e-29	7961.86	748.322	3.022e-34	9582.72	1261.81	4.14364e-06	4922.68	365.792	3.36159e-35	UCUCACACAGAAAUCGCACCCGU	experimental		mature miRNA	standard	MIMAT0000753	hsa-miR-342-3p	hsa-miR-342-3p
368	hsa-miR-342-5p	742.41	76.6866	9.05954e-25	947.851	133.699	4.33118e-12	371.154	50.6003	1.50299e-10	397.904	41.5784	6.712e-22	414.111	84.796	8.64057e-06	205.806	43.2538	4.19783e-09	165.253	54.8153	0.000241784	97.2347	23.3587	0.0113499	AGGGGUGCUAUCUGUGAUUGA	experimental		mature miRNA	standard	MIMAT0004694	hsa-miR-342-5p	hsa-miR-342-5p
369	hsa-miR-345-3p	2.59445	10.7859	1	2.6711	10.2198	1	1.57186	12.9711	1	3.26169	8.03484	1	4.21486	25.8201	0.844393	13.2151	22.3758	0.597368	0.108731	40.9151	0.924425	5.00364	12.581	0.803952	GCCCUGAACGAGGGGUCUGGAG	experimental		mature miRNA	standard	MIMAT0022698	hsa-miR-345-3p	hsa-miR-345-3p
370	hsa-miR-345-5p	9.32028	14.1512	0.631579	14.6186	12.4655	0.410505	2.70458	12.7243	0.98379	0.719918	7.60246	1	20.9413	35.8496	0.464303	2.8115	16.6598	0.850647	0.610481	42.7785	0.897247	1.96484	11.4909	0.892401	GCUGACUCCUAGUCCAGGGCUC	experimental		mature miRNA	standard	MIMAT0000772	hsa-miR-345-5p	hsa-miR-345-5p
371	hsa-miR-346	4.39546	14.5117	0.86318	1.44982	9.02812	0.866559	8.84688	22.1196	0.808605	0.991697	6.47717	1	4.79379	24.9405	0.758884	5.19747	18.5994	0.811924	1.11729	37.5576	0.806903	1.77726	13.3398	1	UGUCUGCCCGCAUGCCUGCCUCU	experimental		mature miRNA	standard	MIMAT0000773	hsa-miR-346	hsa-miR-346
372	hsa-miR-361-3p	140.757	28.7455	3.20226e-09	352.957	54.1759	3.74402e-09	122.212	30.5344	0.00240528	199.83	34.1143	2.67456e-09	134.361	52.0624	0.0170655	67.9233	26.7555	0.000587444	83.4581	65.7981	0.0892915	25.3877	21.3792	0.407339	UCCCCCAGGUGUGAUUCUGAUUU	experimental		mature miRNA	standard	MIMAT0004682	hsa-miR-361-3p	hsa-miR-361-3p
373	hsa-miR-361-5p	494.136	49.3623	1.50269e-26	863.356	108.132	1.42462e-12	362.054	50.9158	6.57424e-09	342.655	38.882	4.92762e-19	506.1	144.33	0.00103622	188.259	46.2173	5.25835e-07	199.882	70.1268	0.00133053	97.6121	25.6597	0.0179623	UUAUCAGAAUCUCCAGGGGUAC	experimental		mature miRNA	standard	MIMAT0000703	hsa-miR-361-5p	hsa-miR-361-5p
374	hsa-miR-362-3p	67.4581	47.4387	0.100909	146.588	33.5094	0.00202361	59.6861	24.8283	0.117604	60.351	15.0203	0.000140853	106.73	62.3653	0.114285	35.5694	29.7345	0.121836	25.7622	43.5525	0.2048	4.61533	12.9826	0.780687	AACACACCUAUUCAAGGAUUCA	experimental		mature miRNA	standard	MIMAT0004683	hsa-miR-362-3p	hsa-miR-362-3p
375	hsa-miR-362-5p	28.1754	20.6154	0.110379	98.6814	64.7699	0.25507	14.9527	14.5658	0.540417	16.3621	10.745	0.221521	33.4023	28.196	0.234173	16.1421	22.2992	0.340465	9.50965	41.1626	0.511229	18.1448	30.0042	0.637166	AAUCCUUGGAACCUAGGUGUGAGU	experimental		mature miRNA	standard	MIMAT0000705	hsa-miR-362-5p	hsa-miR-362-5p
376	hsa-miR-363-3p	68.8673	29.3775	0.0084492	201.086	49.1184	0.000285785	63.0178	20.7087	0.0379066	88.6326	18.6853	7.82911e-07	240.093	58.9906	0.0002398	82.8117	31.8315	0.000428833	223.67	63.6109	5.03493e-05	101.999	25.0117	0.00390732	AAUUGCACGGUAUCCAUCUGUA	experimental		mature miRNA	standard	MIMAT0000707	hsa-miR-363-3p	hsa-miR-363-3p
377	hsa-miR-363-5p	14.2629	15.815	0.248449	36.8818	14.7354	0.150056	60.1428	34.1129	0.183144	214.346	29.6078	4.42323e-13	6.00299	25.8993	0.76406	27.4243	25.7731	0.140104	38.0709	49.1638	0.134632	7.43258	15.1041	0.742566	CGGGUGGAUCACGAUGCAAUUU	experimental		mature miRNA	standard	MIMAT0003385	hsa-miR-363-5p	hsa-miR-363-5p
378	hsa-miR-365a-3p	5.35855	12.4758	0.686599	25.1244	14.9625	0.302091	18.086	18.8813	0.501591	44.0323	12.8776	0.00287198	5.80554	26.8176	0.753373	5.76932	19.5515	0.715306	6.18291	41.8144	0.64999	2.69732	12.8111	0.93401	UAAUGCCCCUAAAAAUCCUUAU	experimental		mature miRNA	standard	MIMAT0000710,MIMAT0022834	hsa-miR-365a-3p	hsa-miR-365a-3p, hsa-miR-365b-3p
379	hsa-miR-365a-5p	22.8229	41.7601	0.666151	2.34738	9.85335	0.872809	1.98422	13.4256	1	1.55113	7.8016	1	7.24623	28.2231	0.635302	9.57512	21.3371	0.598314	2.37222	57.9006	0.785448	5.84744	20.0159	0.835775	AGGGACUUUUGGGGGCAGAUGUG	experimental		mature miRNA	standard	MIMAT0009199	hsa-miR-365a-5p	hsa-miR-365a-5p
380	hsa-miR-365b-5p	4.23681	12.4366	0.994945	0.0125571	7.71395	1	10.2819	20.3199	0.904631	3.00932	8.25359	1	4.68874	25.6344	0.758948	0.633478	18.5505	1	0.248189	42.2217	1	0.861557	11.9557	1	AGGGACUUUCAGGGGCAGCUGU	experimental		mature miRNA	standard	MIMAT0022833	hsa-miR-365b-5p	hsa-miR-365b-5p
381	hsa-miR-367-3p	0.0648483	10.7889	1	4.79532	21.1609	0.855044	3.48077	12.3986	0.853584	3.17928	9.4445	1	4.00937	26.6285	0.747128	0.966047	16.2547	1	0.179029	76.7826	1	3.57327	13.9278	0.878046	AAUUGCACUUUAGCAAUGGUGA	experimental		mature miRNA	standard	MIMAT0000719	hsa-miR-367-3p	hsa-miR-367-3p
382	hsa-miR-367-5p	0.0792184	13.6504	1	1.3338	12.4957	1	4.29801	11.8104	0.863861	2.53316	7.84671	1	3.82452	27.6764	0.724641	2.01736	16.6356	1	0.0202293	39.1629	1	1.85179	13.6196	1	ACUGUUGCUAAUAUGCAACUCU	experimental		mature miRNA	standard	MIMAT0004686	hsa-miR-367-5p	hsa-miR-367-5p
383	hsa-miR-369-3p	7.77955	25.8867	0.907904	0.161216	8.10294	1	25.8066	14.7252	0.228765	42.3539	15.2524	0.0264054	5.2188	25.2811	0.745835	9.67435	16.8451	0.491603	4.80559	88.7361	0.770145	14.1164	16.414	0.582312	AAUAAUACAUGGUUGAUCUUU	experimental		mature miRNA	standard	MIMAT0000721	hsa-miR-369-3p	hsa-miR-369-3p
384	hsa-miR-369-5p	1.07869	11.9526	1	1.70184	9.03488	0.918422	3.35319	12.8939	1	7.11766	15.8117	0.992167	5.06122	23.554	0.62469	2.47238	17.744	0.958919	0.355432	51.2632	0.96968	2.83268	11.8342	0.909709	AGAUCGACCGUGUUAUAUUCGC	experimental		mature miRNA	standard	MIMAT0001621	hsa-miR-369-5p	hsa-miR-369-5p
385	hsa-miR-370-3p	3.9807	12.4415	0.927091	3.47675	9.4418	0.769634	2.17707	11.3039	0.979901	1.74658	7.43243	1	0.425822	26.7051	0.9959	13.9207	20.1099	0.473661	0.349824	39.9204	1	0.104856	11.3191	1	GCCUGCUGGGGUGGAACCUGGU	experimental		mature miRNA	standard	MIMAT0000722	hsa-miR-370-3p	hsa-miR-370-3p
386	hsa-miR-370-5p	0.0764229	6.37407	1	0.0137457	4.39209	1	0.0133061	7.67983	1	10.1143	2.89546	0.186821	10.0332	19.9326	0.32425	1.47418	6.5526	0.861651	0.000215961	15.4899	1	0.0178717	6.33719	1	CAGGUCACGUCUCUGCAGUUAC	experimental		mature miRNA	standard	MIMAT0026483	hsa-miR-370-5p	hsa-miR-370-5p
387	hsa-miR-371a-3p	1.91817	17.1276	1	0.233779	7.43502	1	3.18561	12.5548	0.892596	0.051084	6.13839	1	6.64175	26.5529	0.568748	0.146272	16.3464	1	0.000172982	40.6656	1	2.20714	11.979	1	AAGUGCCGCCAUCUUUUGAGUGU	experimental		mature miRNA	standard	MIMAT0000723	hsa-miR-371a-3p	hsa-miR-371a-3p
388	hsa-miR-371a-5p	3.83065	14.3	1	5.66979	17.0391	0.921786	12.7484	14.294	0.511571	1.97491	6.75431	1	8.13043	27.3901	0.719598	10.4974	17.516	0.517884	0.00031631	42.5195	1	8.29117	14.9918	0.686406	ACUCAAACUGUGGGGGCACU	experimental		mature miRNA	standard	MIMAT0004687	hsa-miR-371a-5p	hsa-miR-371a-5p
389	hsa-miR-371b-3p	1.77766	5.5723	0.920774	14.0624	3.69611	0.0132362	7.8146	7.71407	0.523798	0.0447071	2.80667	1	10.9054	26.3876	0.428661	0.359208	9.93256	0.977673	0.000281302	11.4662	1	0.0141925	4.61213	1	AAGUGCCCCCACAGUUUGAGUGC	experimental		mature miRNA	standard	MIMAT0019893	hsa-miR-371b-3p	hsa-miR-371b-3p
390	hsa-miR-371b-5p	13.0715	7.7083	0.0741041	6.5638	4.99565	0.52237	11.235	8.73837	0.440805	10.1428	3.18379	0.035696	8.96157	16.4779	0.498202	12.5669	13.9496	0.251839	1.83761	20.7086	0.60736	12.7385	9.55812	0.421242	ACUCAAAAGAUGGCGGCACUUU	experimental		mature miRNA	standard	MIMAT0019892	hsa-miR-371b-5p	hsa-miR-371b-5p
391	hsa-miR-372-3p	0.792261	11.2188	1	10.3297	11.8603	0.60385	6.61536	15.7869	0.803991	2.57049	7.01953	0.892002	10.7981	25.7885	0.526281	3.15922	16.522	0.838218	0.000356242	38.9081	1	2.57818	12.6908	0.981616	AAAGUGCUGCGACAUUUGAGCGU	experimental		mature miRNA	standard	MIMAT0000724	hsa-miR-372-3p	hsa-miR-372-3p
392	hsa-miR-372-5p	0.0809199	5.04005	1	5.28183	4.40596	0.521265	0.0140085	5.56155	1	2.4858	3.75407	0.848399	0.0619099	12.7442	0.985521	2.83618	7.08992	0.734297	0.000254226	12.5956	1	0.0157958	6.70956	1	CCUCAAAUGUGGAGCACUAUUCU	experimental		mature miRNA	standard	MIMAT0026484	hsa-miR-372-5p	hsa-miR-372-5p
393	hsa-miR-373-3p	0.0456724	10.744	1	4.26549	8.71034	0.757681	9.53311	21.6123	0.698972	3.29543	9.37946	1	3.44447	25.3516	0.816984	4.10289	15.5103	0.703925	0.104494	59.9911	1	7.90352	12.9033	0.592205	GAAGUGCUUCGAUUUUGGGGUGU	experimental		mature miRNA	standard	MIMAT0000726	hsa-miR-373-3p	hsa-miR-373-3p
394	hsa-miR-373-5p	4.39791	13.4786	0.916289	3.9084	9.28936	0.920134	15.7138	18.8206	0.567608	2.52855	8.33949	1	3.17739	27.4271	0.792249	12.6573	17.1078	0.403335	0.0455443	39.8606	1	9.77372	15.1256	0.643764	ACUCAAAAUGGGGGCGCUUUCC	experimental		mature miRNA	standard	MIMAT0000725	hsa-miR-373-5p	hsa-miR-373-5p
395	hsa-miR-374a-3p	1.98325	12.9279	1	2.35057	9.35323	0.946299	12.5643	12.3673	0.453198	18.2891	11.1695	0.296431	9.47517	26.0009	0.595416	23.4481	19.355	0.139688	0.000379353	42.6546	1	8.77628	15.2067	0.689996	CUUAUCAGAUUGUAUUGUAAUU	experimental		mature miRNA	standard	MIMAT0004688	hsa-miR-374a-3p	hsa-miR-374a-3p
396	hsa-miR-374a-5p	137.598	30.0444	8.98297e-08	207.062	36.2754	3.6788e-06	597.5	61.9709	3.78772e-18	834.472	42.6803	2.66297e-71	924.781	122.123	3.4162e-14	953.223	81.4382	1.28729e-37	249.291	86.5927	0.0206879	595.16	247.374	0.0225968	UUAUAAUACAACCUGAUAAGUG	experimental		mature miRNA	standard	MIMAT0000727	hsa-miR-374a-5p	hsa-miR-374a-5p
397	hsa-miR-374b-3p	7.53272	4.6715	0.192782	16.6041	4.03378	0.112501	1.3922	4.87133	0.879768	5.49594	3.80443	0.518333	20.8867	16.2031	0.146784	14.2694	7.97194	0.0626464	0.000423174	11.5014	1	11.313	8.74777	0.41707	CUUAGCAGGUUGUAUUAUCAUU	experimental		mature miRNA	standard	MIMAT0004956	hsa-miR-374b-3p	hsa-miR-374b-3p
398	hsa-miR-374b-5p	523.601	52.0004	3.4454e-27	814.299	66.0531	7.65108e-34	1046.7	66.5375	1.88761e-51	1210.29	72.8396	1.66674e-62	1437.96	134.113	5.00495e-27	764.371	55.7177	1.85438e-47	475.303	31.2973	4.06077e-63	692.431	68.1996	1.91019e-16	AUAUAAUACAACCUGCUAAGUG	experimental		mature miRNA	standard	MIMAT0004955	hsa-miR-374b-5p	hsa-miR-374b-5p
399	hsa-miR-374c-3p	0.0661413	4.67129	1	12.7327	3.86876	0.178017	0.0147653	5.97475	1	4.58066	1.96908	0.479018	0.00214362	17.0101	1	11.2641	7.63087	0.15374	0.000287127	13.5855	1	1.18654	4.5375	0.876186	CACUUAGCAGGUUGUAUUAUAU	experimental		mature miRNA	standard	MIMAT0022735	hsa-miR-374c-3p	hsa-miR-374c-3p
400	hsa-miR-374c-5p	362.009	30.2233	3.64763e-40	625.658	34.3547	3.96309e-69	600.636	50.9112	4.3637e-28	661.64	57.9666	1.31995e-30	785.386	96.3858	1.07779e-15	569.2	49.8653	7.974e-35	250.155	27.3876	2.80603e-28	551.813	54.9186	1.69413e-15	AUAAUACAACCUGCUAAGUGCU	experimental		mature miRNA	standard	MIMAT0018443	hsa-miR-374c-5p	hsa-miR-374c-5p
401	hsa-miR-375	4.8754	15.5202	1	1.67922	9.00253	1	3.47009	11.9243	0.89038	3.00856	9.12608	1	5.20939	23.6554	0.615292	5.55208	18.1753	0.697217	0.000227107	41.7497	1	6.23988	12.4659	0.723486	UUUGUUCGUUCGGCUCGCGUGA	experimental		mature miRNA	standard	MIMAT0000728	hsa-miR-375	hsa-miR-375
402	hsa-miR-376a-2-5p	0.0727812	4.1466	1	0.960688	3.42909	0.870494	0.0112325	8.40598	1	0.0497617	2.24831	1	7.84724	16.2496	0.294535	0.0146801	12.6005	1	0.00018344	16.8194	1	3.60825	4.93425	0.542107	GGUAGAUUUUCCUUCUAUGGU	experimental		mature miRNA	standard	MIMAT0022928	hsa-miR-376a-2-5p	hsa-miR-376a-2-5p
403	hsa-miR-376a-3p	0.0339037	5.93111	1	1.20603	4.1928	0.881317	44.1679	10.9716	0.00217681	56.1997	9.66115	5.60146e-08	21.5179	15.8646	0.0888783	3.28199	10.1462	0.651525	0.437545	16.1012	0.824957	18.0772	7.93256	0.085364	AUCAUAGAGGAAAAUCCACGU	experimental		mature miRNA	standard	MIMAT0000729	hsa-miR-376a-3p	hsa-miR-376a-3p
404	hsa-miR-376a-5p	0.0516225	4.44166	1	3.15105	2.08931	0.451041	1.83501	8.07217	0.88519	10.0366	2.67345	0.0431452	25.0418	25.7076	0.16912	3.41559	7.08932	0.619032	0.00033753	17.2369	1	0.187865	6.93796	0.98402	GUAGAUUCUCCUUCUAUGAGUA	experimental		mature miRNA	standard	MIMAT0003386	hsa-miR-376a-5p	hsa-miR-376a-5p
405	hsa-miR-376b-3p	0.0405877	4.17085	1	7.62724	2.42152	0.174169	27.2047	24.5065	0.490385	23.674	3.78868	1.27343e-05	16.9741	18.2422	0.224479	10.1741	10.7852	0.265476	0.000416668	12.9835	1	1.42894	4.95414	0.829232	AUCAUAGAGGAAAAUCCAUGUU	experimental		mature miRNA	standard	MIMAT0002172	hsa-miR-376b-3p	hsa-miR-376b-3p
406	hsa-miR-376b-5p	0.0433177	5.22876	1	0.739072	2.64566	0.896336	10.9829	10.9995	0.522248	3.77195	2.16641	0.424308	14.1463	16.9956	0.229151	5.9389	8.70515	0.452868	0.000335865	11.8552	1	4.54379	7.69606	0.677734	CGUGGAUAUUCCUUCUAUGUUU	experimental		mature miRNA	standard	MIMAT0022923	hsa-miR-376b-5p	hsa-miR-376b-5p
407	hsa-miR-376c-3p	2.59754	5.59049	0.647402	1.18621	4.70378	0.909757	222.673	27.5377	7.54374e-12	422.494	32.1392	2.0052e-39	11.5788	20.3766	0.528684	6.33075	8.63739	0.333836	4.99322	15.9362	0.182992	114.877	13.6531	4.61177e-09	AACAUAGAGGAAAUUCCACGU	experimental		mature miRNA	standard	MIMAT0000720	hsa-miR-376c-3p	hsa-miR-376c-3p
408	hsa-miR-376c-5p	0.0541995	4.87299	1	13.2088	6.5842	0.3674	0.0136865	5.0437	1	7.30914	2.9279	0.240346	20.0373	16.741	0.0849726	8.85807	10.5801	0.350236	0.000321742	12.6456	1	0.793982	5.44334	0.907766	GGUGGAUAUUCCUUCUAUGUU	experimental		mature miRNA	standard	MIMAT0022861	hsa-miR-376c-5p	hsa-miR-376c-5p
409	hsa-miR-377-3p	0.051961	3.57749	1	0.0149722	3.29649	0.997759	23.1824	9.82614	0.143813	154.123	18.3535	1.36547e-12	26.6113	27.9567	0.174226	10.7889	10.2258	0.311818	0.000329548	12.5859	1	0.0188515	6.79401	1	AUCACACAAAGGCAACUUUUGU	experimental		mature miRNA	standard	MIMAT0000730	hsa-miR-377-3p	hsa-miR-377-3p
410	hsa-miR-377-5p	0.0639123	2.9177	1	0.998169	3.91416	0.893832	0.0138663	7.6597	1	13.8788	3.90538	0.0913876	13.2705	16.5373	0.182205	7.8775	7.50451	0.298538	0.000284946	9.37875	1	0.0549967	4.81351	0.993859	AGAGGUUGCCCUUGGUGAAUUC	experimental		mature miRNA	standard	MIMAT0004689	hsa-miR-377-5p	hsa-miR-377-5p
411	hsa-miR-378a-3p	128.508	26.717	1.59162e-09	331.753	37.7951	6.72975e-15	157.235	17.9771	3.02593e-12	123.813	13.2186	6.26961e-22	272.431	70.7572	0.00038506	81.8088	13.4212	1.46196e-16	277.562	23.3551	8.33218e-49	114.817	16.792	2.71578e-06	ACUGGACUUGGAGUCAGAAGGC	experimental		mature miRNA	standard	MIMAT0000732	hsa-miR-378a-3p	hsa-miR-378a-3p
412	hsa-miR-378a-5p	0.0783032	4.5347	1	2.49775	5.14598	0.639439	0.00979573	5.78349	1	3.53559	3.1254	0.539429	6.19572	18.8486	0.428404	0.0112452	8.67913	1	17.7437	33.4839	0.00571859	0.0116304	6.12374	1	CUCCUGACUCCAGGUCCUGUGU	experimental		mature miRNA	standard	MIMAT0000731	hsa-miR-378a-5p	hsa-miR-378a-5p
413	hsa-miR-378b	0.0602561	4.29887	1	0.010834	2.74037	1	0.00962953	7.37244	1	11.3657	2.86891	0.0184143	5.74729	10.3837	0.24779	0.0114708	9.27574	1	15.2469	17.1925	1.56834e-07	6.41659	6.81108	0.50987	ACUGGACUUGGAGGCAGAA	experimental		mature miRNA	standard	MIMAT0014999	hsa-miR-378b	hsa-miR-378b
414	hsa-miR-378c	38.069	8.94833	1.56286e-08	78.526	13.4404	8.88103e-05	32.2333	8.10636	0.00893015	37.4929	9.5328	0.000174478	66.9419	24.2107	0.00634814	23.502	8.98761	0.000140913	81.9526	15.9861	2.33292e-20	19.2936	7.28324	0.0853871	ACUGGACUUGGAGUCAGAAGAGUGG	experimental		mature miRNA	standard	MIMAT0016847	hsa-miR-378c	hsa-miR-378c
415	hsa-miR-378d	74.126	18.202	5.67476e-08	191.26	26.4621	1.16989e-08	70.7668	23.1599	0.0303136	67.5773	8.53489	1.71629e-15	106.653	28.1674	0.000455633	50.6152	23.0654	0.00224569	116.67	36.8892	1.19175e-06	36.9035	10.5308	0.0216947	ACUGGACUUGGAGUCAGAAA	experimental		mature miRNA	standard	MIMAT0018926	hsa-miR-378d	hsa-miR-378d
416	hsa-miR-378e	123.063	21.2257	2.12401e-13	306.81	60.5715	8.3758e-06	181.46	35.1222	2.41113e-05	161.087	25.1058	5.62484e-11	250.767	68.9672	0.000840463	84.894	26.2192	1.29212e-05	214.5	29.521	7.28824e-21	160.993	28.1307	4.65245e-05	ACUGGACUUGGAGUCAGGA	experimental		mature miRNA	standard	MIMAT0018927	hsa-miR-378e	hsa-miR-378e
417	hsa-miR-378f	47.8936	13.4868	2.80926e-06	103.806	21.5165	0.000588696	40.893	8.1551	0.000790936	46.9825	11.64	9.51074e-05	77.7712	24.9921	0.00234241	30.9363	14.9212	0.00312688	91.5745	14.4129	1.23462e-27	11.3573	10.8115	0.502711	ACUGGACUUGGAGCCAGAAG	experimental		mature miRNA	standard	MIMAT0018932	hsa-miR-378f	hsa-miR-378f
418	hsa-miR-378g	72.5646	17.9628	7.21734e-08	150.74	26.4685	1.54012e-05	62.2188	15.1009	0.00382023	53.9888	10.8449	7.06581e-07	123.191	29.2796	8.94656e-05	36.8484	23.9905	0.0268429	125.732	16.4098	1.29471e-31	45.4324	12.2792	0.0134282	ACUGGGCUUGGAGUCAGAAG	experimental		mature miRNA	standard	MIMAT0018937	hsa-miR-378g	hsa-miR-378g
419	hsa-miR-378h	0.0858474	3.38895	1	0.0080435	3.84854	1	2.34174	7.59199	0.795187	1.47335	4.40965	0.913125	0.00136151	15.846	1	0.0142647	7.15146	1	11.4291	17.9025	8.69186e-06	0.0200414	7.28001	1	ACUGGACUUGGUGUCAGAUGG	experimental		mature miRNA	standard	MIMAT0018984	hsa-miR-378h	hsa-miR-378h
420	hsa-miR-378i	65.8257	13.2759	5.24839e-11	113.615	25.4549	0.00125635	87.8572	14.6513	1.23207e-05	54.1768	12.2949	1.3098e-05	85.5658	34.9147	0.0199943	28.1198	17.0408	0.0175955	108.061	18.6594	1.04101e-20	26.5353	11.7275	0.144223	ACUGGACUAGGAGUCAGAAGG	experimental		mature miRNA	standard	MIMAT0019074	hsa-miR-378i	hsa-miR-378i
421	hsa-miR-378j	0.04834	4.38049	1	2.42536	4.18072	0.71926	0.010428	3.64753	1	10.0242	3.43994	0.048436	5.05666	22.8492	0.686279	3.13634	12.3108	0.713238	18.412	21.2279	0.000165995	4.61773	9.04213	0.682473	ACUGGAUUUGGAGCCAGAA	experimental		mature miRNA	standard	MIMAT0024612	hsa-miR-378j	hsa-miR-378j
422	hsa-miR-379-3p	0.0567978	6.24575	1	0.0111614	4.244	1	44.2232	59.2232	0.549736	12.5125	2.35724	0.0034579	0.00187072	21.7517	1	0.0126619	6.495	1	13.7158	11.9395	8.70657e-11	4.26439	8.71188	0.796529	UAUGUAACAUGGUCCACUAACU	experimental		mature miRNA	standard	MIMAT0004690	hsa-miR-379-3p	hsa-miR-379-3p
423	hsa-miR-379-5p	0.0593158	5.24606	1	0.00762251	4.75106	1	77.7521	103.284	0.516088	16.032	5.76741	0.0400802	16.98	55.0373	0.557369	0.0118228	6.77969	1	14.751	16.7832	3.06842e-06	0.0154303	5.21645	1	UGGUAGACUAUGGAACGUAGG	experimental		mature miRNA	standard	MIMAT0000733	hsa-miR-379-5p	hsa-miR-379-5p
424	hsa-miR-380-3p	0.0923935	4.87709	1	0.00829091	3.89649	1	0.0100698	6.88132	1	4.01824	5.07712	0.765737	0.0478149	13.8076	0.986637	0.0140638	7.76174	1	8.52526	15.5454	7.96859e-06	0.0179176	8.17365	1	UAUGUAAUAUGGUCCACAUCUU	experimental		mature miRNA	standard	MIMAT0000735	hsa-miR-380-3p	hsa-miR-380-3p
425	hsa-miR-380-5p	0.0735472	4.66822	1	4.70793	3.20413	0.309392	0.00938394	6.79397	1	0.0438608	4.01718	1	0.00151917	17.0774	1	0.0115499	9.32822	1	7.93949	21.9402	0.00453533	16.5054	22.726	0.568694	UGGUUGACCAUAGAACAUGCGC	experimental		mature miRNA	standard	MIMAT0000734	hsa-miR-380-5p	hsa-miR-380-5p
426	hsa-miR-381-3p	0.0784882	6.8342	1	0.199496	2.41288	0.929679	0.00985855	7.80603	1	5.49013	2.73171	0.275738	15.9975	51.3136	0.520779	0.0119622	8.96619	1	7.75377	18.4517	0.00187335	0.0128753	5.18699	1	UAUACAAGGGCAAGCUCUCUGU	experimental		mature miRNA	standard	MIMAT0000736	hsa-miR-381-3p	hsa-miR-381-3p
427	hsa-miR-381-5p	1.56957	6.24509	0.858033	14.5441	7.48435	0.352146	239.858	19.9866	1.13164e-23	291.882	41.4928	1.23729e-11	0.00340698	16.5847	1	9.69283	10.8774	0.251558	20.1957	24.1682	0.0124962	36.2131	7.76259	0.00979506	AGCGAGGUUGCCCUUUGUAUAU	experimental		mature miRNA	standard	MIMAT0022862	hsa-miR-381-5p	hsa-miR-381-5p
428	hsa-miR-382-3p	2.07359	4.7159	0.909277	0.00878754	4.89085	1	0.0113887	6.92139	1	11.3145	6.8616	0.423833	3.3282	13.3641	0.543264	0.0147624	6.41835	1	6.92233	20.3825	0.0070757	0.0190251	5.90602	1	AAUCAUUCACGGACAACACUU	experimental		mature miRNA	standard	MIMAT0022697	hsa-miR-382-3p	hsa-miR-382-3p
429	hsa-miR-382-5p	0.052734	3.89818	1	8.93889	3.63871	0.0428269	7.52095	6.3929	0.343547	1.00735	2.83919	0.846113	6.11095	22.6724	0.578613	9.19181	8.94942	0.132151	10.3897	22.4055	0.0254439	0.0124668	9.78151	1	GAAGUUGUUCGUGGUGGAUUCG	experimental		mature miRNA	standard	MIMAT0000737	hsa-miR-382-5p	hsa-miR-382-5p
430	hsa-miR-383-3p	0.0695388	5.45392	1	48.6045	86.9279	0.633726	0.0113191	8.62496	1	261.088	38.2715	2.29977e-11	2.98794	24.3645	0.782381	0.0107832	12.0552	1	21.5861	74.6246	0.231952	0.0109498	4.92993	1	ACAGCACUGCCUGGUCAGA	experimental		mature miRNA	standard	MIMAT0026485	hsa-miR-383-3p	hsa-miR-383-3p
431	hsa-miR-383-5p	0.0757604	5.76689	1	0.00660547	4.16618	1	3.33628	9.37513	0.728559	0.036178	4.32006	1	26.4748	77.5157	0.470944	0.0124107	10.0575	1	2.80992	18.0772	0.0784078	0.0141857	9.22691	1	AGAUCAGAAGGUGAUUGUGGCU	experimental		mature miRNA	standard	MIMAT0000738	hsa-miR-383-5p	hsa-miR-383-5p
432	hsa-miR-384	0.0906651	4.78701	1	0.0065495	3.20223	1	3.42325	8.21947	0.688768	0.0455782	4.33508	1	0.00115298	19.7046	1	0.0133078	6.23554	1	84.7343	60.4762	0.000108343	0.0190487	6.77976	1	AUUCCUAGAAAUUGUUCAUA	experimental		mature miRNA	standard	MIMAT0001075	hsa-miR-384	hsa-miR-384
433	hsa-miR-409-3p	7.4406	10.8209	0.53648	6.90536	3.36079	0.257656	4.78267	6.52971	0.628499	11.6288	6.34582	0.170955	18.5066	25.4755	0.380072	1.34515	12.2916	0.891817	16.3048	12.5626	1.34585e-06	15.3352	24.0179	0.6641	GAAUGUUGCUCGGUGAACCCCU	experimental		mature miRNA	standard	MIMAT0001639	hsa-miR-409-3p	hsa-miR-409-3p
434	hsa-miR-409-5p	8.47771	5.28193	0.427313	204.572	28.7395	1.07063e-10	1.45823	11.8706	0.931286	2.52242	4.72443	0.758148	15.6588	33.0872	0.427773	0.0119798	9.76991	1	6.92174	11.0178	0.00057963	0.0122916	4.82052	1	AGGUUACCCGAGCAACUUUGCAU	experimental		mature miRNA	standard	MIMAT0001638	hsa-miR-409-5p	hsa-miR-409-5p
435	hsa-miR-410-3p	8.15432	7.428	0.581448	0.0123804	2.9916	1	0.0120987	10.3997	1	9.2034	6.37493	0.510463	1.50841	16.4929	0.841376	0.0144515	12.6242	1	5.00594	15.8223	0.00896291	6.61764	21.737	0.875786	AAUAUAACACAGAUGGCCUGU	experimental		mature miRNA	standard	MIMAT0002171	hsa-miR-410-3p	hsa-miR-410-3p
436	hsa-miR-410-5p	12.9691	6.61161	0.446506	0.00808751	2.17244	1	0.916185	5.59209	0.898233	0.05251	4.29694	1	0.117933	13.6633	0.971405	0.01664	10.6587	1	1.72771	6.39457	0.000736533	0.0223081	6.99404	1	AGGUUGUCUGUGAUGAGUUCG	experimental		mature miRNA	standard	MIMAT0026558	hsa-miR-410-5p	hsa-miR-410-5p
437	hsa-miR-411-3p	5.70099	7.40414	0.622783	0.367019	4.60995	0.950288	23.5986	15.3734	0.2552	0.113237	2.84087	0.989583	2.11667	20.0666	0.825814	2.53726	13.9669	0.83404	9.61544	19.4256	0.00821382	1.47736	7.12489	0.907348	UAUGUAACACGGUCCACUAACC	experimental		mature miRNA	standard	MIMAT0004813	hsa-miR-411-3p	hsa-miR-411-3p
438	hsa-miR-411-5p	2.08028	4.18942	0.903241	0.00731984	6.67798	1	0.202005	5.38268	0.972424	0.0453142	5.91379	1	2.84313	17.1273	0.621923	0.0146144	9.58628	1	3.42428	13.0056	0.00394348	0.0180563	5.91411	1	UAGUAGACCGUAUAGCGUACG	experimental		mature miRNA	standard	MIMAT0003329	hsa-miR-411-5p	hsa-miR-411-5p
439	hsa-miR-412-3p	1.48259	5.56536	0.934239	0.0106302	2.36934	1	0.00962469	9.72547	1	0.0445161	2.58066	1	3.04306	13.3804	0.575227	0.0130263	11.4704	1	4.01351	15.3806	0.0061814	22.6129	40.5695	0.715808	ACUUCACCUGGUCCACUAGCCGU	experimental		mature miRNA	standard	MIMAT0002170	hsa-miR-412-3p	hsa-miR-412-3p
440	hsa-miR-412-5p	8.73937	5.36828	0.539772	0.00945828	3.27792	1	1.34712	4.31841	0.821105	0.0591948	3.36569	1	0.00155063	21.234	1	1.99504	12.2922	0.896586	2.28453	8.86384	0.00686358	0.0272825	5.39375	1	UGGUCGACCAGUUGGAAAGUAAU	experimental		mature miRNA	standard	MIMAT0026557	hsa-miR-412-5p	hsa-miR-412-5p
441	hsa-miR-421	17.0509	7.80567	0.0477261	21.2147	8.87381	0.121256	7.75863	6.18232	0.409684	0.822327	4.97384	0.937171	9.17507	16.3803	0.406161	6.11873	9.68864	0.42214	9.18844	16.7914	0.0151097	0.791923	8.05661	0.950374	AUCAACAGACAUUAAUUGGGCGC	experimental		mature miRNA	standard	MIMAT0003339	hsa-miR-421	hsa-miR-421
442	hsa-miR-422a	0.0555758	5.89929	1	0.0125769	4.12234	1	0.845935	5.75939	0.896177	0.0478541	7.36214	1	0.00172827	16.7984	1	21.2708	15.5216	0.0890598	3.6786	17.4511	0.0601406	14.7434	9.3485	0.407988	ACUGGACUUAGGGUCAGAAGGC	experimental		mature miRNA	standard	MIMAT0001339	hsa-miR-422a	hsa-miR-422a
443	hsa-miR-423-3p	9.46807	4.53061	0.160698	23.5056	7.70519	0.0257501	9.28681	8.52687	0.490005	6.56661	7.37036	0.569774	6.85374	22.0841	0.610978	4.49636	11.2272	0.631843	10.6355	16.1837	0.00597393	0.0161041	5.08786	1	AGCUCGGUCUGAGGCCCCUCAGU	experimental		mature miRNA	standard	MIMAT0001340	hsa-miR-423-3p	hsa-miR-423-3p
444	hsa-miR-423-5p	935.439	32.4465	5.9271e-198	1756.16	80.9753	5.88873e-103	714.773	52.9343	6.42568e-37	631.187	44.1738	7.13096e-47	835.261	101.906	4.71013e-16	241.787	35.6622	3.21143e-15	378.124	29.3065	2.44316e-48	367.95	32.9757	6.47571e-16	UGAGGGGCAGAGAGCGAGACUUU	experimental		mature miRNA	standard	MIMAT0004748	hsa-miR-423-5p	hsa-miR-423-5p
445	hsa-miR-424-3p	2.84622	6.23428	0.884041	1.42037	4.68432	0.852906	0.0127705	6.66801	1	4.83306	4.34335	0.687991	0.00196923	14.5191	1	0.0146754	10.7987	1	2.05058	15.2666	0.186985	2.90746	17.3486	0.927644	CAAAACGUGAGGCGCUGCUAU	experimental		mature miRNA	standard	MIMAT0004749	hsa-miR-424-3p	hsa-miR-424-3p
446	hsa-miR-424-5p	95.9259	16.5368	5.56227e-14	326.424	47.186	1.051e-09	307.626	30.6249	2.25684e-18	387.681	39.6248	5.46706e-23	107.349	35.787	0.0068738	38.5823	15.2428	0.000280127	186.166	20.993	2.64475e-32	78.6182	13.8224	0.000188351	CAGCAGCAAUUCAUGUUUUGAA	experimental		mature miRNA	standard	MIMAT0001341	hsa-miR-424-5p	hsa-miR-424-5p
447	hsa-miR-425-3p	40.4931	22.6321	0.0581656	41.3874	8.23373	0.00243991	0.186807	5.33832	0.981872	11.3926	3.80409	0.0464834	11.9868	15.3956	0.326423	13.0553	12.2159	0.169536	12.2941	10.188	2.80245e-06	2.22817	5.37804	0.799916	AUCGGGAAUGUCGUGUCCGCCC	experimental		mature miRNA	standard	MIMAT0001343	hsa-miR-425-3p	hsa-miR-425-3p
448	hsa-miR-425-5p	695.082	40.6629	1.04512e-72	1796.35	152.464	1.10371e-31	655.49	62.1467	5.87275e-23	669.383	45.7189	4.14496e-49	1083.41	112.755	1.10731e-21	299.931	39.0178	3.0224e-18	484.26	35.5655	2.7621e-51	404.435	41.1509	4.76136e-13	AAUGACACGAUCACUCCCGUUGA	experimental		mature miRNA	standard	MIMAT0003393	hsa-miR-425-5p	hsa-miR-425-5p
449	hsa-miR-429	0.0910623	3.55346	1	0.011638	3.65989	1	0.0116827	5.5903	1	0.0625155	2.52723	1	2.01116	21.3471	0.775337	0.880105	8.73119	0.941555	0.000165752	11.0405	1	0.0175319	6.50368	1	UAAUACUGUCUGGUAAAACCGU	experimental		mature miRNA	standard	MIMAT0001536	hsa-miR-429	hsa-miR-429
450	hsa-miR-431-3p	0.0875626	5.3769	1	2.00034	3.68733	0.707499	0.0117471	7.56861	1	0.0516926	2.24017	1	6.51529	19.7655	0.415352	0.242851	6.5755	0.977521	0.000198177	13.8174	1	0.0129285	6.72603	1	CAGGUCGUCUUGCAGGGCUUCU	experimental		mature miRNA	standard	MIMAT0004757	hsa-miR-431-3p	hsa-miR-431-3p
451	hsa-miR-431-5p	0.0591974	6.94938	1	10.6863	4.64679	0.027946	10.0622	5.96658	0.152443	4.32256	3.80667	0.386814	34.7049	16.7998	0.000635036	0.00992241	11.2702	1	33.9148	21.7784	8.01622e-08	0.0104198	7.14279	1	UGUCUUGCAGGCCGUCAUGCA	experimental		mature miRNA	standard	MIMAT0001625	hsa-miR-431-5p	hsa-miR-431-5p
452	hsa-miR-432-3p	5.38926	4.71962	0.597798	11.8045	3.87815	0.0282732	7.65326	4.23437	0.24267	1.23581	2.36832	0.845875	0.00202098	21.889	1	10.009	7.80734	0.145953	24.1909	28.6351	0.00219475	0.0203104	5.15977	1	CUGGAUGGCUCCUCCAUGUCU	experimental		mature miRNA	standard	MIMAT0002815	hsa-miR-432-3p	hsa-miR-432-3p
453	hsa-miR-432-5p	0.0469166	5.93368	1	0.819358	3.05214	0.871614	5.27591	9.36566	0.678336	20.3588	4.73427	0.00411037	0.002261	16.1979	1	3.23098	8.68357	0.633761	19.3063	20.9218	0.000166359	6.14408	11.0234	0.742452	UCUUGGAGUAGGUCAUUGGGUGG	experimental		mature miRNA	standard	MIMAT0002814	hsa-miR-432-5p	hsa-miR-432-5p
454	hsa-miR-433-3p	0.055146	3.88393	1	12.0773	3.50468	0.00778879	2.50097	6.22996	0.753628	3.99969	3.35989	0.464349	1.52989	18.8422	0.845211	6.33944	7.28505	0.225778	8.17014	10.0016	2.82061e-05	0.0129953	6.59006	1	AUCAUGAUGGGCUCCUCGGUGU	experimental		mature miRNA	standard	MIMAT0001627	hsa-miR-433-3p	hsa-miR-433-3p
455	hsa-miR-433-5p	0.081853	5.98862	1	5.28894	2.33724	0.0528398	0.0105545	7.70215	1	7.11359	3.04976	0.206458	0.349761	22.5656	0.957654	0.011999	10.2736	1	7.26762	18.1699	0.00484206	0.0125391	5.84818	1	UACGGUGAGCCUGUCAUUAUUC	experimental		mature miRNA	standard	MIMAT0026554	hsa-miR-433-5p	hsa-miR-433-5p
456	hsa-miR-448	0.0528902	4.97934	1	8.78035	3.82397	0.328841	0.0135719	8.57145	1	5.468	3.42497	0.486924	11.3909	18.2509	0.335469	8.46102	10.4211	0.366914	0.000312948	20.6939	1	2.26075	5.18449	0.73447	UUGCAUAUGUAGGAUGUCCCAU	experimental		mature miRNA	standard	MIMAT0001532	hsa-miR-448	hsa-miR-448
457	hsa-miR-449a	2.14899	5.06315	0.837058	10.7548	6.10653	0.538446	3.25564	3.14648	0.607114	12.8362	2.30277	0.0255419	0.00289509	12.9598	1	8.98032	8.14229	0.321782	0.000380788	10.7895	1	11.4434	4.66529	0.215515	UGGCAGUGUAUUGUUAGCUGGU	experimental		mature miRNA	standard	MIMAT0001541	hsa-miR-449a	hsa-miR-449a
458	hsa-miR-449b-3p	8.71861	5.41693	0.100126	21.0695	5.18457	0.137952	20.1377	7.9318	0.19882	26.664	4.29984	4.64362e-05	16.9625	20.6348	0.4029	43.2229	19.7963	0.017067	0.000520278	14.1137	1	20.8087	5.98137	0.0344947	CAGCCACAACUACCCUGCCACU	experimental		mature miRNA	standard	MIMAT0009203	hsa-miR-449b-3p	hsa-miR-449b-3p
459	hsa-miR-449b-5p	0.0461215	6.30638	0.998828	8.03658	3.53944	0.409657	13.9373	6.63192	0.226893	9.19185	2.2004	0.0734757	0.00261058	21.0139	1	10.5246	6.50119	0.0892574	0.000364484	13.8257	1	16.9862	9.60208	0.273691	AGGCAGUGUAUUGUUAGCUGGC	experimental		mature miRNA	standard	MIMAT0003327	hsa-miR-449b-5p	hsa-miR-449b-5p
460	hsa-miR-449c-3p	0.0432153	4.99028	1	9.72699	3.65369	0.240645	3.09622	8.42668	0.818918	10.5191	2.79219	0.0262002	35.7791	28.1873	0.118696	11.539	5.27009	0.0090057	0.000386835	17.3625	1	1.4198	3.96481	0.778651	UUGCUAGUUGCACUCCUCUCUGU	experimental		mature miRNA	standard	MIMAT0013771	hsa-miR-449c-3p	hsa-miR-449c-3p
461	hsa-miR-449c-5p	0.0399709	3.8781	1	2.83891	2.88144	0.689876	4.89219	6.03262	0.616049	15.8738	3.19645	0.00189847	23.3094	19.6754	0.140356	7.99628	5.00269	0.0617696	0.000378556	16.3764	1	9.21586	3.97159	0.0796171	UAGGCAGUGUAUUGCUAGCGGCUGU	experimental		mature miRNA	standard	MIMAT0010251	hsa-miR-449c-5p	hsa-miR-449c-5p
462	hsa-miR-450a-1-3p	0.0605826	4.83126	1	0.0097195	3.42707	1	0.0086176	8.24653	1	0.0389473	2.84357	1	8.58367	14.398	0.182108	3.02715	7.95157	0.626256	11.528	12.0362	7.70361e-11	2.38314	5.25725	0.760212	AUUGGGAACAUUUUGCAUGUAU	experimental		mature miRNA	standard	MIMAT0022700	hsa-miR-450a-1-3p	hsa-miR-450a-1-3p
463	hsa-miR-450a-2-3p	0.0795797	3.99954	1	0.00741138	3.35685	1	0.00870622	6.34254	1	0.0416278	3.86469	1	5.7402	13.0604	0.221436	1.7735	10.2468	0.846203	12.6613	16.9247	2.93908e-07	0.0158243	5.66761	1	AUUGGGGACAUUUUGCAUUCAU	experimental		mature miRNA	standard	MIMAT0031074	hsa-miR-450a-2-3p	hsa-miR-450a-2-3p
464	hsa-miR-450a-5p	0.0538624	6.81407	1	0.0114607	5.38957	1	0.00967677	6.7931	1	3.96308	4.08161	0.626189	8.42255	15.3782	0.297099	1.13501	11.548	0.905078	16.0041	20.681	2.80829e-05	4.99968	5.1077	0.519024	UUUUGCGAUGUGUUCCUAAUAU	experimental		mature miRNA	standard	MIMAT0001545	hsa-miR-450a-5p	hsa-miR-450a-5p
465	hsa-miR-450b-3p	0.0688853	6.17232	1	0.917114	3.64675	0.791863	0.127073	7.80946	0.98667	0.0340813	3.68423	1	5.08776	17.6708	0.450545	2.72247	12.3603	0.773337	15.695	19.8482	2.15675e-05	0.0128264	5.32918	1	UUGGGAUCAUUUUGCAUCCAUA	experimental		mature miRNA	standard	MIMAT0004910	hsa-miR-450b-3p	hsa-miR-450b-3p
466	hsa-miR-450b-5p	0.0668328	5.30437	1	2.28329	5.1144	0.704972	0.00855168	4.86144	1	0.0337723	4.24498	1	6.24466	17.3372	0.382981	0.0102988	8.84894	1	9.97795	13.7381	2.615e-07	3.10011	10.3077	0.774142	UUUUGCAAUAUGUUCCUGAAUA	experimental		mature miRNA	standard	MIMAT0004909	hsa-miR-450b-5p	hsa-miR-450b-5p
467	hsa-miR-451a	2793.55	95.1222	1.859e-194	2738.14	137.651	1.26397e-87	2546.19	138.622	6.66961e-73	2304.73	146.881	9.36548e-56	1280.94	130.963	7.12599e-23	243.048	50.2108	2.79023e-08	976.136	96.333	4.2373e-26	329.274	44.4154	1.42507e-07	AAACCGUUACCAUUACUGAGUU	experimental		mature miRNA	standard	MIMAT0001631	hsa-miR-451a	hsa-miR-451a
468	hsa-miR-451b	0.0546137	4.33058	1	0.0110265	4.75414	1	20.0008	20.0623	0.397191	0.0438414	6.4895	1	0.0016714	21.4924	1	7.36391	9.10311	0.324948	8.16735	28.4723	0.0477787	4.89533	6.65461	0.710209	UAGCAAGAGAACCAUUACCAUU	experimental		mature miRNA	standard	MIMAT0019840	hsa-miR-451b	hsa-miR-451b
469	hsa-miR-452-3p	0.0875718	5.71632	1	0.00693719	3.46825	1	0.151356	3.82508	0.966999	0.0422872	4.07151	1	2.38688	21.202	0.705443	0.0132115	5.50784	1	2.78152	7.49663	5.32301e-06	0.0152117	4.72257	1	CUCAUCUGCAAAGAAGUAAGUG	experimental		mature miRNA	standard	MIMAT0001636	hsa-miR-452-3p	hsa-miR-452-3p
470	hsa-miR-452-5p	0.0650822	6.79882	1	33.5327	8.06262	0.00066278	0.0103708	5.83646	1	4.97051	3.56823	0.378574	8.98946	16.1445	0.261275	0.971324	9.81992	0.897447	22.0698	22.3248	4.90441e-05	0.0111	8.9072	1	AACUGUUUGCAGAGGAAACUGA	experimental		mature miRNA	standard	MIMAT0001635	hsa-miR-452-5p	hsa-miR-452-5p
471	hsa-miR-454-3p	144.505	16.7378	2.44658e-26	243.344	34.1024	2.25792e-09	79.6888	16.9759	0.000652657	101.691	23.0315	5.62792e-06	371.163	110.992	0.00178839	100.927	32.4977	4.60291e-05	164.663	29.4351	1.80344e-14	80.206	25.6162	0.0352503	UAGUGCAAUAUUGCUUAUAGGGU	experimental		mature miRNA	standard	MIMAT0003885	hsa-miR-454-3p	hsa-miR-454-3p
472	hsa-miR-454-5p	0.105602	4.91187	1	1.55746	3.8208	0.687366	0.00967767	6.245	1	0.0497136	5.6006	1	0.00118398	21.0395	1	0.0135606	11.869	1	4.709	8.82569	9.1795e-08	0.0149323	5.2467	1	ACCCUAUCAAUAUUGUCUCUGC	experimental		mature miRNA	standard	MIMAT0003884	hsa-miR-454-5p	hsa-miR-454-5p
473	hsa-miR-455-3p	13.3706	5.25692	0.262138	16.7891	27.8217	0.579535	0.132377	4.24226	0.978941	0.0373145	4.4372	1	4.88438	30.7441	0.700619	0.0129805	11.3135	1	7.3416	16.3218	0.00195721	0.0136318	5.3468	1	GCAGUCCAUGGGCAUAUACAC	experimental		mature miRNA	standard	MIMAT0004784	hsa-miR-455-3p	hsa-miR-455-3p
474	hsa-miR-455-5p	0.0904413	4.85907	1	3.05937	4.28802	0.460898	0.00904667	5.28693	1	0.0381226	2.7297	1	1.7957	14.1944	0.668579	0.0118322	10.4891	1	3.90305	14.5932	0.00794935	0.0114118	17.2976	1	UAUGUGCCUUUGGACUACAUCG	experimental		mature miRNA	standard	MIMAT0003150	hsa-miR-455-5p	hsa-miR-455-5p
475	hsa-miR-466	43.0541	20.2408	0.000988565	261.409	64.069	0.000226844	612.262	108.325	1.38885e-07	416.317	43.7964	5.97957e-22	891.628	137.956	1.48105e-10	362.499	86.0247	2.07348e-06	350.108	55.7841	2.71005e-13	2123.76	267.646	2.34292e-13	AUACACAUACACGCAACACACAU	experimental		mature miRNA	standard	MIMAT0015002	hsa-miR-466	hsa-miR-466
476	hsa-miR-483-3p	34.8734	8.15015	0.000104752	11.1323	11.1743	0.485154	10.2831	7.02716	0.381748	18.3533	6.70473	0.0469342	5.50567	14.5586	0.548244	3.78393	18.6795	0.821007	15.5894	13.203	1.343e-05	0.0182077	14.129	1	UCACUCCUCUCCUCCCGUCUU	experimental		mature miRNA	standard	MIMAT0002173	hsa-miR-483-3p	hsa-miR-483-3p
477	hsa-miR-483-5p	539.95	34.7051	6.40538e-63	63.9308	15.0238	0.00402214	674.108	45.7116	3.08801e-44	544.892	33.4484	2.68593e-61	115.553	25.6058	3.85062e-05	380.685	43.5242	8.13331e-23	469.311	35.3066	1.83231e-52	538.815	66.1226	1.56692e-11	AAGACGGGAGGAAAGAAGGGAG	experimental		mature miRNA	standard	MIMAT0004761	hsa-miR-483-5p	hsa-miR-483-5p
478	hsa-miR-484	60.7998	8.59726	1.99544e-20	211.204	24.1491	2.97795e-12	39.8071	10.918	0.0168824	50.1572	11.9843	6.10423e-05	60.5741	18.3062	0.00177296	13.791	16.9871	0.230821	49.5405	23.5821	1.43527e-05	31.1142	16.6156	0.220462	UCAGGCUCAGUCCCCUCCCGAU	experimental		mature miRNA	standard	MIMAT0002174	hsa-miR-484	hsa-miR-484
479	hsa-miR-485-3p	3.14225	6.27367	0.707361	2.96399	3.07678	0.582768	11.3494	8.32374	0.36002	15.5986	3.9047	0.00168575	11.2234	11.9785	0.219573	2.08727	13.4853	0.841831	18.6153	9.68163	5.12156e-12	10.9374	7.85111	0.359572	GUCAUACACGGCUCUCCUCUCU	experimental		mature miRNA	standard	MIMAT0002176	hsa-miR-485-3p	hsa-miR-485-3p
480	hsa-miR-485-5p	0.0746168	4.93591	1	0.00796049	4.7368	1	0.358243	5.2542	0.950672	5.64289	2.65112	0.276752	4.60697	22.9794	0.612336	0.0128835	12.3017	1	5.43154	13.6861	0.000712681	0.0157751	6.69201	1	AGAGGCUGGCCGUGAUGAAUUC	experimental		mature miRNA	standard	MIMAT0002175	hsa-miR-485-5p	hsa-miR-485-5p
481	hsa-miR-486-3p	25.872	8.69296	0.000479765	15.7748	6.47679	0.172757	34.4604	11.4356	0.0445827	19.7372	6.56573	0.0116739	16.1002	23.4338	0.430361	2.71872	11.22	0.755276	31.4792	12.9354	1.85928e-11	8.27902	7.00116	0.458851	CGGGGCAGCUCAGUACAGGAU	experimental		mature miRNA	standard	MIMAT0004762	hsa-miR-486-3p	hsa-miR-486-3p
482	hsa-miR-486-5p	97.027	18.5287	1.01937e-09	130.8	23.2148	2.12968e-05	29.3915	12.0235	0.130362	25.529	6.14458	0.000384282	24.4157	37.9503	0.484326	3.38438	12.4712	0.732794	20.1222	15.1876	0.000100544	1.82762	4.64577	0.805098	UCCUGUACUGAGCUGCCCCGAG	experimental		mature miRNA	standard	MIMAT0002177	hsa-miR-486-5p	hsa-miR-486-5p
483	hsa-miR-487a-3p	1.25829	3.80401	0.925517	4.04913	2.7868	0.214721	5.342	8.65669	0.658755	3.99943	4.09484	0.61749	0.187088	12.1614	0.960013	0.0129405	11.4381	1	7.40795	12.1316	0.000177313	0.0153603	5.76928	1	AAUCAUACAGGGACAUCCAGUU	experimental		mature miRNA	standard	MIMAT0002178	hsa-miR-487a-3p	hsa-miR-487a-3p
484	hsa-miR-487a-5p	0.429367	4.06419	0.987221	0.00711915	5.09419	1	0.00918192	6.3873	1	0.045591	2.95467	1	4.74359	24.3425	0.562661	0.0139097	7.53645	1	3.70373	10.943	8.36696e-05	0.0160618	3.63868	1	GUGGUUAUCCCUGCUGUGUUCG	experimental		mature miRNA	standard	MIMAT0026559	hsa-miR-487a-5p	hsa-miR-487a-5p
485	hsa-miR-487b-3p	9.50374	4.68548	0.171207	10.7849	7.2252	0.275087	14.9148	8.15342	0.245947	19.452	9.38202	0.11224	4.89321	12.7952	0.518477	1.86722	8.77785	0.81028	20.7784	9.3578	1.98353e-14	0.0167872	6.50596	1	AAUCGUACAGGGUCAUCCACUU	experimental		mature miRNA	standard	MIMAT0003180	hsa-miR-487b-3p	hsa-miR-487b-3p
486	hsa-miR-487b-5p	10.1103	4.98181	0.0588819	17.5642	15.8804	0.530633	20.9274	8.06023	0.084331	1.58857	2.6769	0.754862	1.91872	13.1989	0.808978	2.00101	6.7862	0.71561	9.31209	14.6526	0.00537569	17.3452	11.877	0.335645	GUGGUUAUCCCUGUCCUGUUCG	experimental		mature miRNA	standard	MIMAT0026614	hsa-miR-487b-5p	hsa-miR-487b-5p
487	hsa-miR-488-3p	11.0457	5.04359	0.457022	0.00778184	4.16824	1	0.0106359	8.02567	1	0.0515825	2.47118	1	2.19332	15.0903	0.661174	0.0159294	8.57732	1	2.74896	15.7371	0.0354244	0.0197784	5.98273	1	UUGAAAGGCUAUUUCUUGGUC	experimental		mature miRNA	standard	MIMAT0004763	hsa-miR-488-3p	hsa-miR-488-3p
488	hsa-miR-488-5p	0.111508	4.21144	1	0.00770587	3.03915	1	0.00942972	6.61288	1	0.0582543	3.58264	1	0.00111319	23.5334	1	0.0152434	7.63225	1	3.65534	20.8284	0.0277505	0.0192728	6.42729	1	CCCAGAUAAUGGCACUCUCAA	experimental		mature miRNA	standard	MIMAT0002804	hsa-miR-488-5p	hsa-miR-488-5p
489	hsa-miR-489-3p	12.0627	4.52392	0.221922	9.7666	4.5609	0.166992	0.0116064	6.48959	1	0.0496741	2.02403	1	0.00179154	19.0481	1	0.0138009	9.99039	1	7.33435	10.9423	7.47764e-07	9.36978	7.01664	0.417135	GUGACAUCACAUAUACGGCAGC	experimental		mature miRNA	standard	MIMAT0002805	hsa-miR-489-3p	hsa-miR-489-3p
490	hsa-miR-489-5p	27.8178	26.7297	0.577294	1.54371	3.56848	0.700197	0.0121878	6.25202	1	0.864997	2.90599	0.91792	6.56808	24.1538	0.563806	0.0144473	7.83176	1	4.88432	12.1257	0.00155169	0.016386	6.61503	1	GGUCGUAUGUGUGACGCCAUUU	experimental		mature miRNA	standard	MIMAT0026605	hsa-miR-489-5p	hsa-miR-489-5p
491	hsa-miR-490-3p	54.5311	81.0618	0.719449	12.5162	21.4722	0.630459	0.0125021	12.6582	1	0.0547012	3.71405	1	0.0015183	17.4951	1	0.016004	9.8171	1	6.43441	9.86958	3.5728e-07	0.0191334	6.63554	1	CAACCUGGAGGACUCCAUGCUG	experimental		mature miRNA	standard	MIMAT0002806	hsa-miR-490-3p	hsa-miR-490-3p
492	hsa-miR-490-5p	3.06744	6.04318	0.835116	0.0124338	2.23047	1	7.46143	5.88212	0.389123	6.82285	3.13415	0.376652	0.00206529	18.4384	1	0.0150836	8.89079	1	5.05395	11.6981	0.000772941	5.80614	6.94398	0.717549	CCAUGGAUCUCCAGGUGGGU	experimental		mature miRNA	standard	MIMAT0004764	hsa-miR-490-5p	hsa-miR-490-5p
493	hsa-miR-491-3p	5.42519	4.68906	0.680888	26.529	44.386	0.624592	0.0119759	7.69402	1	2.57196	2.50709	0.630413	5.75361	22.0355	0.580797	0.012849	7.68515	1	6.60681	9.18384	2.18976e-06	0.0133357	7.26032	1	CUUAUGCAAGAUUCCCUUCUAC	experimental		mature miRNA	standard	MIMAT0004765	hsa-miR-491-3p	hsa-miR-491-3p
494	hsa-miR-491-5p	27.8054	5.62086	0.00657984	4.1039	4.00473	0.407389	0.0128596	8.17911	1	3.77139	2.26568	0.472383	2.20389	18.2173	0.778636	0.0143899	11.2424	1	6.42249	13.7022	0.00140753	0.0165285	6.09246	1	AGUGGGGAACCCUUCCAUGAGG	experimental		mature miRNA	standard	MIMAT0002807	hsa-miR-491-5p	hsa-miR-491-5p
495	hsa-miR-492	2.04719	3.38031	0.886852	2.87854	9.43866	0.763869	0.0101998	8.10604	1	0.0407291	3.2648	1	3.44663	18.1799	0.595171	0.0130943	11.5796	1	3.84221	15.4146	0.0183295	0.0133982	7.34255	1	AGGACCUGCGGGACAAGAUUCUU	experimental		mature miRNA	standard	MIMAT0002812	hsa-miR-492	hsa-miR-492
496	hsa-miR-493-3p	21.1607	14.5354	0.394175	1.76143	6.5223	0.874505	0.0138105	9.20078	1	14.047	2.2483	0.00485697	0.00222399	23.5945	1	0.0150086	8.87636	1	7.9919	7.27322	2.11646e-12	4.31498	8.19718	0.795269	UGAAGGUCUACUGUGUGCCAGG	experimental		mature miRNA	standard	MIMAT0003161	hsa-miR-493-3p	hsa-miR-493-3p
497	hsa-miR-493-5p	10.3478	4.30155	0.415478	0.0103645	3.601	1	0.0134609	11.1592	1	36.7736	4.04328	7.83366e-06	0.00174624	22.2974	1	0.0177978	10.5929	1	6.31103	13.6486	0.000174755	0.0266165	8.16509	1	UUGUACAUGGUAGGCUUUCAUU	experimental		mature miRNA	standard	MIMAT0002813	hsa-miR-493-5p	hsa-miR-493-5p
498	hsa-miR-494-3p	93.1583	14.9908	1.79898e-16	408.664	84.5656	8.96392e-06	204.353	26.0046	4.94987e-11	613.051	27.1163	4.47104e-115	173.962	36.6126	1.66996e-05	114.887	33.926	1.04614e-05	213.933	19.8666	3.85846e-43	348.929	68.6104	9.40537e-05	UGAAACAUACACGGGAAACCUC	experimental		mature miRNA	standard	MIMAT0002816	hsa-miR-494-3p	hsa-miR-494-3p
499	hsa-miR-494-5p	9.70338	2.9533	0.138096	0.0099517	3.18885	1	0.0103795	7.52503	1	0.0470825	2.35272	1	5.08892	14.3906	0.417544	0.0142787	11.1386	1	3.6128	10.8516	0.000397904	3.45723	11.4039	0.866519	AGGUUGUCCGUGUUGUCUUCUCU	experimental		mature miRNA	standard	MIMAT0026607	hsa-miR-494-5p	hsa-miR-494-5p
500	hsa-miR-495-3p	14.9733	4.30792	0.0429486	0.00948651	4.89075	1	18.5301	15.5922	0.435585	76.3409	9.27933	1.05193e-10	0.891485	14.2801	0.883236	0.0154226	11.0249	1	10.6792	8.20795	3.28119e-13	0.0233375	7.12378	1	AAACAAACAUGGUGCACUUCUU	experimental		mature miRNA	standard	MIMAT0002817	hsa-miR-495-3p	hsa-miR-495-3p
501	hsa-miR-495-5p	31.6181	19.3671	0.472161	0.00832835	2.07886	1	0.0114967	8.64566	1	0.0599126	2.43125	1	0.0601793	24.8662	0.991097	0.0175469	9.03649	1	2.72175	8.60297	0.000122541	0.0234428	6.02275	1	GAAGUUGCCCAUGUUAUUUUCG	experimental		mature miRNA	standard	MIMAT0022924	hsa-miR-495-5p	hsa-miR-495-5p
502	hsa-miR-496	0.539275	5.57008	0.980012	0.0119674	6.37381	1	3.49736	5.24106	0.620275	3.62107	3.02196	0.656887	0.0018809	16.1921	1	0.0143266	10.9664	1	3.92709	6.49372	8.29784e-08	5.76626	18.1554	0.879069	UGAGUAUUACAUGGCCAAUCUC	experimental		mature miRNA	standard	MIMAT0002818	hsa-miR-496	hsa-miR-496
503	hsa-miR-497-3p	0.0783299	3.95177	1	0.00678361	3.98757	1	3.90997	5.57469	0.504509	0.0384795	2.48573	1	4.29566	14.4729	0.376444	0.0128276	14.6622	1	2.58564	8.91222	0.000713106	0.0150498	8.00018	1	CAAACCACACUGUGGUGUUAGA	experimental		mature miRNA	standard	MIMAT0004768	hsa-miR-497-3p	hsa-miR-497-3p
504	hsa-miR-497-5p	23.6368	7.9463	0.0607357	3.73097	2.41721	0.265595	0.0134298	6.57189	1	4.46988	2.42498	0.403799	4.63711	12.1859	0.469999	2.25146	10.1646	0.824802	5.65586	10.0051	0.000525839	0.0178825	8.42653	1	CAGCAGCACACUGUGGUUUGU	experimental		mature miRNA	standard	MIMAT0002820	hsa-miR-497-5p	hsa-miR-497-5p
505	hsa-miR-498	25.4281	11.201	0.00240509	0.0177642	3.64007	1	136.412	27.0238	3.76569e-05	83.296	13.4073	1.71815e-08	6.08458	17.8222	0.696243	60.128	24.0276	0.00232692	35.6531	13.7761	1.79848e-12	233.496	37.0017	2.11935e-05	UUUCAAGCCAGGGGGCGUUUUUC	experimental		mature miRNA	standard	MIMAT0002824	hsa-miR-498	hsa-miR-498
506	hsa-miR-499a-3p	0.0710253	2.82626	1	0.00997579	4.75617	1	0.00880285	7.12488	1	0.0432402	4.06114	1	2.97788	23.3527	0.72373	0.012383	11.8628	1	1.10597	12.3944	0.170108	6.79484	14.7188	0.739558	AACAUCACAGCAAGUCUGUGCU	experimental		mature miRNA	standard	MIMAT0004772	hsa-miR-499a-3p	hsa-miR-499a-3p
507	hsa-miR-499a-5p	4.47658	4.20818	0.547828	4.47782	5.81611	0.642221	1.67043	5.79205	0.843238	8.0827	3.78639	0.19746	4.02635	22.0849	0.753529	0.0123978	11.7079	1	1.87696	16.2854	0.368191	5.26136	12.9586	0.779387	UUAAGACUUGCAGUGAUGUUU	experimental		mature miRNA	standard	MIMAT0002870	hsa-miR-499a-5p	hsa-miR-499a-5p
508	hsa-miR-499b-3p	0.104526	3.85086	1	0.0090401	3.23567	1	0.0106225	5.14743	1	1.17324	3.61681	0.935692	0.00128807	12.6917	1	0.015946	8.09811	1	0.959829	20.5706	0.459127	0.0201022	6.58777	1	AACAUCACUGCAAGUCUUAACA	experimental		mature miRNA	standard	MIMAT0019898	hsa-miR-499b-3p	hsa-miR-499b-3p
509	hsa-miR-499b-5p	0.100267	4.98768	1	0.0075026	3.18112	1	0.00915604	5.76481	1	0.0499062	2.48583	1	0.309355	8.68867	0.872902	0.014322	7.53562	1	1.16288	15.6566	0.226207	0.0162421	4.85594	1	ACAGACUUGCUGUGAUGUUCA	experimental		mature miRNA	standard	MIMAT0019897	hsa-miR-499b-5p	hsa-miR-499b-5p
510	hsa-miR-500a-3p	75.4386	18.0459	0.000138245	34.293	11.4519	0.0164212	25.5568	14.8548	0.277519	30.7965	8.46975	0.00305643	15.7582	20.7218	0.274382	0.0132054	12.3537	1	8.9386	19.0846	0.0318344	0.0157939	7.68955	1	AUGCACCUGGGCAAGGAUUCUG	experimental		mature miRNA	standard	MIMAT0002871	hsa-miR-500a-3p	hsa-miR-500a-3p
511	hsa-miR-500a-5p	20.4217	10.5361	0.308423	2.28055	4.95313	0.738298	4.64436	8.19187	0.739408	13.3972	5.4302	0.249617	0.00200305	17.5142	1	0.0163484	12.6948	1	1.93318	19.4101	0.405353	0.021873	6.74969	1	UAAUCCUUGCUACCUGGGUGAGA	experimental		mature miRNA	standard	MIMAT0004773	hsa-miR-500a-5p	hsa-miR-500a-5p
512	hsa-miR-500b-3p	5.16424	6.82623	0.683828	10.1208	7.98513	0.37302	1.51542	5.06018	0.84389	6.80384	4.24766	0.33689	16.0542	12.8984	0.060924	4.38689	10.188	0.619034	2.75144	19.1041	0.373798	0.0158177	7.50728	1	GCACCCAGGCAAGGAUUCUG	experimental		mature miRNA	standard	MIMAT0027032	hsa-miR-500b-3p	hsa-miR-500b-3p
513	hsa-miR-500b-5p	38.1901	30.1262	0.326643	5.14045	6.77656	0.644943	0.0134762	4.22766	1	7.04084	2.83526	0.219891	3.95607	19.3507	0.716115	0.0138016	9.44452	1	2.48515	13.3885	0.136046	1.9518	7.06014	0.863668	AAUCCUUGCUACCUGGGU	experimental		mature miRNA	standard	MIMAT0016925	hsa-miR-500b-5p	hsa-miR-500b-5p
514	hsa-miR-501-3p	13.7104	5.31073	0.18427	0.0115086	5.5484	1	0.982764	3.54398	0.868584	229.421	35.0121	6.2451e-09	1.78081	22.1467	0.866941	0.0173715	10.4491	1	0.249622	13.9093	0.815617	0.0233867	11.0361	1	AAUGCACCCGGGCAAGGAUUCU	experimental		mature miRNA	standard	MIMAT0004774	hsa-miR-501-3p	hsa-miR-501-3p
515	hsa-miR-501-5p	4.85859	3.15912	0.3949	4.14046	3.49571	0.617094	7.4555	7.61663	0.590562	3.57805	4.12774	0.746934	0.753815	15.8856	0.925071	0.0163236	6.53649	1	0.000305794	10.6922	1	18.087	24.8013	0.641708	AAUCCUUUGUCCCUGGGUGAGA	experimental		mature miRNA	standard	MIMAT0002872	hsa-miR-501-5p	hsa-miR-501-5p
516	hsa-miR-502-3p	36.887	15.1311	0.021626	41.9164	12.8492	0.0165689	31.3362	12.1635	0.113998	25.958	8.3096	0.012191	20.6242	17.938	0.142297	3.6953	8.88357	0.635207	5.69164	13.577	0.0665154	0.0167566	8.43637	1	AAUGCACCUGGGCAAGGAUUCA	experimental		mature miRNA	standard	MIMAT0004775	hsa-miR-502-3p	hsa-miR-502-3p
517	hsa-miR-502-5p	0.0850575	4.48158	1	0.208205	4.03924	0.970713	9.50132	9.74034	0.518673	0.0628234	3.22727	1	0.00146852	14.5903	1	0.512601	8.25124	0.965942	0.000206237	8.19365	1	0.0193839	5.17261	1	AUCCUUGCUAUCUGGGUGCUA	experimental		mature miRNA	standard	MIMAT0002873	hsa-miR-502-5p	hsa-miR-502-5p
518	hsa-miR-503-3p	0.0565255	4.4217	1	5.18362	19.1908	0.841128	2.41264	9.73608	0.851989	4.39265	2.54606	0.309902	12.5603	27.5305	0.412624	2.1482	9.89356	0.792555	0.420788	20.6944	0.840633	0.0127262	7.17287	1	GGGGUAUUGUUUCCGCUGCCAGG	experimental		mature miRNA	standard	MIMAT0022925	hsa-miR-503-3p	hsa-miR-503-3p
519	hsa-miR-503-5p	4.93487	4.86939	0.719512	0.335413	5.88439	0.964814	8.37755	7.43066	0.499738	23.5618	5.5367	0.0281833	0.00193606	19.5546	1	0.0166903	7.97441	1	0.654639	13.1797	0.588899	0.0225386	5.26462	1	UAGCAGCGGGAACAGUUCUGCAG	experimental		mature miRNA	standard	MIMAT0002874	hsa-miR-503-5p	hsa-miR-503-5p
520	hsa-miR-504-3p	27.6994	11.7328	0.0683813	0.0113595	3.87344	1	1.62584	6.04897	0.867823	11.6219	3.88879	0.144533	3.59568	16.8581	0.69569	16.5031	13.4167	0.219646	2.20658	10.7492	0.119531	0.0257669	6.60784	1	GGGAGUGCAGGGCAGGGUUUC	experimental		mature miRNA	standard	MIMAT0026612	hsa-miR-504-3p	hsa-miR-504-3p
521	hsa-miR-504-5p	0.0677837	6.00011	1	3.96243	5.43717	0.720144	4.18085	6.55331	0.660517	0.0548723	2.4253	1	0.00175848	15.926	1	0.0155533	14.8387	1	0.000214331	19.2513	1	12.2813	9.59544	0.372702	AGACCCUGGUCUGCACUCUAUC	experimental		mature miRNA	standard	MIMAT0002875	hsa-miR-504-5p	hsa-miR-504-5p
522	hsa-miR-505-3p	43.2299	21.2329	0.0116355	55.7198	16.152	0.0389809	30.3934	10.7462	0.084411	24.7118	5.46778	0.000196393	11.0215	18.6037	0.510794	25.4263	15.5576	0.0293873	7.00458	17.0436	0.122373	7.20169	5.68551	0.449328	CGUCAACACUUGCUGGUUUCCU	experimental		mature miRNA	standard	MIMAT0002876	hsa-miR-505-3p	hsa-miR-505-3p
523	hsa-miR-505-5p	38.6309	16.4429	0.0286762	22.4366	7.86461	0.0651372	15.9653	7.64472	0.200124	14.101	4.8144	0.0372161	23.8064	16.8931	0.072939	0.0129867	7.50994	1	1.25667	12.5457	0.471293	0.683773	9.17022	0.960452	GGGAGCCAGGAAGUAUUGAUGU	experimental		mature miRNA	standard	MIMAT0004776	hsa-miR-505-5p	hsa-miR-505-5p
524	hsa-miR-506-3p	4.49111	7.41117	0.823235	0.0168332	3.72402	1	4.2455	14.907	0.863206	0.0721249	2.79273	1	0.0018935	17.2421	1	0.0202839	11.5961	1	0.000186916	9.86087	1	15.3685	9.62322	0.478489	UAAGGCACCCUUCUGAGUAGA	experimental		mature miRNA	standard	MIMAT0002878	hsa-miR-506-3p	hsa-miR-506-3p
525	hsa-miR-506-5p	0.102645	5.96692	1	0.0708259	3.81716	0.990319	0.0143652	10.295	1	17.3984	3.43902	0.0958239	0.00159534	18.2416	1	0.0200646	7.4204	1	0.000183387	11.0262	1	0.0203764	8.14129	1	UAUUCAGGAAGGUGUUACUUAA	experimental		mature miRNA	standard	MIMAT0022701	hsa-miR-506-5p	hsa-miR-506-5p
526	hsa-miR-507	0.0808021	4.64778	1	0.0145538	4.04178	1	0.0113757	9.02177	1	0.062936	2.65562	1	0.305238	19.3457	0.955907	0.0170068	7.15097	1	0.000150149	13.3029	1	5.3042	6.48944	0.610783	UUUUGCACCUUUUGGAGUGAA	experimental		mature miRNA	standard	MIMAT0002879	hsa-miR-507	hsa-miR-507
527	hsa-miR-508-3p	3.23337	4.3536	0.852476	0.0135261	5.18703	1	0.0150481	6.82011	1	8.08438	3.91868	0.543739	0.883063	14.1439	0.865438	0.0209953	8.30157	1	0.000190559	7.39449	1	0.0217358	7.40532	1	UGAUUGUAGCCUUUUGGAGUAGA	experimental		mature miRNA	standard	MIMAT0002880	hsa-miR-508-3p	hsa-miR-508-3p
528	hsa-miR-508-5p	0.0803164	5.05414	1	0.00732246	4.97233	1	2.0361	11.6087	0.870507	0.0409656	2.85846	1	7.04915	14.3862	0.182256	0.013545	12.8656	1	0.380081	11.2648	0.552767	0.0150114	7.55456	1	UACUCCAGAGGGCGUCACUCAUG	experimental		mature miRNA	standard	MIMAT0004778	hsa-miR-508-5p	hsa-miR-508-5p
529	hsa-miR-509-3-5p	0.0618105	3.74118	1	0.0161753	3.25303	1	28.4186	20.7744	0.350431	0.0622133	3.70752	1	0.00178664	13.5552	1	5.36465	11.2684	0.685334	0.000219237	14.3238	1	2.71121	10.7766	0.907068	UACUGCAGACGUGGCAAUCAUG	experimental		mature miRNA	standard	MIMAT0004975	hsa-miR-509-3-5p	hsa-miR-509-3-5p
530	hsa-miR-509-3p	0.0807764	3.93004	1	2.20307	2.69077	0.610805	7.6824	6.13209	0.415427	0.0587996	2.24452	1	0.00154183	15.9823	1	1.45864	7.8329	0.884103	0.000235193	13.3508	1	0.0176382	7.96929	1	UGAUUGGUACGUCUGUGGGUAG	experimental		mature miRNA	standard	MIMAT0002881	hsa-miR-509-3p	hsa-miR-509-3p
531	hsa-miR-509-5p	0.10818	3.03041	1	237.38	43.2597	5.31307e-06	0.0129137	6.37282	1	0.060564	2.37135	1	0.00138125	12.725	1	0.0167235	7.66413	1	0.000201888	10.3703	1	0.0129216	6.8795	1	UACUGCAGACAGUGGCAAUCA	experimental		mature miRNA	standard	MIMAT0004779	hsa-miR-509-5p	hsa-miR-509-5p
532	hsa-miR-510-3p	0.0673468	4.44492	1	35.5364	39.084	0.597923	0.012147	5.78042	1	0.0468569	2.0051	1	3.63419	9.22294	0.369586	4.52312	7.71551	0.538042	0.000255533	8.65069	1	0.273684	7.78512	0.976268	AUUGAAACCUCUAAGAGUGGA	experimental		mature miRNA	standard	MIMAT0026613	hsa-miR-510-3p	hsa-miR-510-3p
533	hsa-miR-510-5p	7.17679	4.37508	0.358773	0.0168012	4.36672	1	4.98259	5.68181	0.64208	6.47034	2.6441	0.399015	3.40536	18.5415	0.748518	7.95907	10.4876	0.548364	0.00029946	12.695	1	0.204273	6.10642	0.989099	UACUCAGGAGAGUGGCAAUCAC	experimental		mature miRNA	standard	MIMAT0002882	hsa-miR-510-5p	hsa-miR-510-5p
534	hsa-miR-511-3p	0.0794566	5.22433	1	0.0133786	2.95992	1	0.0110521	6.6128	1	0.057454	2.36691	1	5.75062	16.3823	0.394588	0.0164111	9.33095	1	0.000152386	15.6758	1	2.00558	4.90587	0.784452	AAUGUGUAGCAAAAGACAGA	experimental		mature miRNA	standard	MIMAT0026606	hsa-miR-511-3p	hsa-miR-511-3p
535	hsa-miR-511-5p	1.32577	2.85958	0.859857	0.0154689	3.12411	1	8.87356	6.66151	0.436529	3.40946	3.97434	0.765257	16.3943	20.2994	0.223346	3.01018	11.9003	0.837738	0.000282016	11.0674	1	0.230639	5.61033	0.98418	GUGUCUUUUGCUCUGCAGUCA	experimental		mature miRNA	standard	MIMAT0002808	hsa-miR-511-5p	hsa-miR-511-5p
536	hsa-miR-512-3p	0.0892683	1.84269	1	0.0123642	2.43511	1	0.012852	9.89105	1	8.20972	2.82186	0.306836	6.10551	15.2707	0.356528	0.0179714	10.0789	1	0.00017981	10.1289	1	0.0167902	3.95455	1	AAGUGCUGUCAUAGCUGAGGUC	experimental		mature miRNA	standard	MIMAT0002823	hsa-miR-512-3p	hsa-miR-512-3p
537	hsa-miR-512-5p	2.50573	5.34772	0.876516	0.741078	3.49509	0.894165	4.39431	7.70375	0.749351	12.678	2.0877	0.00457862	9.47142	14.4543	0.253483	0.0177195	11.739	1	0.000278484	12.0053	1	0.0169986	6.26724	1	CACUCAGCCUUGAGGGCACUUUC	experimental		mature miRNA	standard	MIMAT0002822	hsa-miR-512-5p	hsa-miR-512-5p
538	hsa-miR-513a-3p	0.0601369	4.7739	1	0.0139253	4.02846	1	2.47387	7.55937	0.826968	2.49502	2.59995	0.74108	13.4423	14.077	0.091515	4.53546	11.7966	0.727746	0.000251756	8.55606	1	0.0657265	6.83385	0.995674	UAAAUUUCACCUUUCUGAGAAGG	experimental		mature miRNA	standard	MIMAT0004777	hsa-miR-513a-3p	hsa-miR-513a-3p
539	hsa-miR-513a-5p	52.1282	12.264	2.33139e-08	28.3993	5.55548	0.0678533	35.5586	10.8988	0.0891659	134.861	15.7967	2.95003e-14	156.618	40.3426	0.000763337	252.464	45.2369	3.29136e-09	0.000656922	14.5714	1	62.0132	12.5379	0.00259484	UUCACAGGGAGGUGUCAU	experimental		mature miRNA	standard	MIMAT0002877	hsa-miR-513a-5p	hsa-miR-513a-5p
540	hsa-miR-513b-3p	0.0633428	3.30621	1	4.89822	4.73467	0.633802	0.0130799	9.30038	1	7.24419	2.70733	0.24435	4.38925	17.595	0.631159	0.0143707	11.3975	1	0.000243111	9.34992	1	4.88178	4.71521	0.390307	AAAUGUCACCUUUUUGAGAGGA	experimental		mature miRNA	standard	MIMAT0026749	hsa-miR-513b-3p	hsa-miR-513b-3p
541	hsa-miR-513b-5p	3.74799	5.03533	0.814259	0.996474	3.13261	0.83981	0.0137639	10.7302	1	0.0562233	3.19589	1	18.6961	19.2492	0.0819469	3.79315	10.5365	0.769887	0.000233606	9.16903	1	0.0168597	6.00908	1	UUCACAAGGAGGUGUCAUUUAU	experimental		mature miRNA	standard	MIMAT0005788	hsa-miR-513b-5p	hsa-miR-513b-5p
542	hsa-miR-513c-3p	0.0749574	3.21169	1	0.0120647	3.73881	1	3.76645	8.64148	0.77457	9.22009	3.01146	0.206244	4.37787	13.8572	0.470614	0.0173305	16.0069	1	0.000212271	10.4782	1	0.0172232	4.72754	1	UAAAUUUCACCUUUCUGAGAAGA	experimental		mature miRNA	standard	MIMAT0022728	hsa-miR-513c-3p	hsa-miR-513c-3p
543	hsa-miR-513c-5p	0.060939	5.84047	1	14.1997	4.18185	0.0127153	5.07634	7.72091	0.632128	7.25973	2.55961	0.113115	0.00186081	14.0703	1	6.67776	5.4638	0.116218	20.6974	15.687	2.84135e-07	0.0160121	6.7483	1	UUCUCAAGGAGGUGUCGUUUAU	experimental		mature miRNA	standard	MIMAT0005789	hsa-miR-513c-5p	hsa-miR-513c-5p
544	hsa-miR-514a-3p	0.0364404	8.73099	1	11.1361	5.02528	0.185426	10.5181	5.59959	0.136637	4.07192	2.38631	0.212195	3.52051	18.7676	0.744877	10.2875	11.2624	0.130379	21.6002	25.1554	0.0026428	9.74338	6.85216	0.23276	AUUGACACUUCUGUGAGUAGA	experimental		mature miRNA	standard	MIMAT0002883	hsa-miR-514a-3p	hsa-miR-514a-3p
545	hsa-miR-514a-5p	0.0392294	6.53512	1	10.2698	2.92409	0.0344627	3.85656	4.61743	0.512475	10.9418	3.9994	0.0278503	2.55485	17.4855	0.789897	6.40381	7.74596	0.190239	20.2262	20.3678	0.000321403	4.27864	6.24547	0.577362	UACUCUGGAGAGUGACAAUCAUG	experimental		mature miRNA	standard	MIMAT0022702	hsa-miR-514a-5p	hsa-miR-514a-5p
546	hsa-miR-514b-3p	0.0439193	6.00038	1	9.00419	3.29488	0.132277	8.25786	4.57328	0.186564	7.18991	2.79572	0.127547	0.00232976	11.4376	1	9.68216	10.9158	0.204633	16.0525	15.7952	3.81163e-05	7.86498	4.16757	0.215041	AUUGACACCUCUGUGAGUGGA	experimental		mature miRNA	standard	MIMAT0015088	hsa-miR-514b-3p	hsa-miR-514b-3p
547	hsa-miR-514b-5p	9.59411	11.3174	0.360737	19.1339	6.08228	0.0919503	9.08501	3.06083	0.0607546	18.2968	2.34878	7.30466e-11	14.6053	15.3643	0.274286	16.5841	10.9371	0.0287198	31.4312	24.9168	0.000568061	14.3275	6.88125	0.171745	UUCUCAAGAGGGAGGCAAUCAU	experimental		mature miRNA	standard	MIMAT0015087	hsa-miR-514b-5p	hsa-miR-514b-5p
548	hsa-miR-515-3p	0.0538777	6.38549	1	10.3383	5.4252	0.311942	0.01144	5.71219	1	7.99568	2.75379	0.138741	0.0021698	16.8264	1	9.84134	9.42641	0.153624	13.3396	20.3287	0.00157795	8.09609	5.13878	0.292153	GAGUGCCUUCUUUUGGAGCGUU	experimental		mature miRNA	standard	MIMAT0002827	hsa-miR-515-3p	hsa-miR-515-3p
549	hsa-miR-515-5p	0.0529046	4.6073	1	3.85929	3.33278	0.346608	5.11562	3.89007	0.304293	6.53876	2.99451	0.135205	2.58378	13.1282	0.661846	6.53035	12.2457	0.451602	17.1922	16.4853	1.97628e-05	0.0135137	7.54728	1	UUCUCCAAAAGAAAGCACUUUCUG	experimental		mature miRNA	standard	MIMAT0002826	hsa-miR-515-5p	hsa-miR-515-5p
550	hsa-miR-516a-3p	0.042224	6.13056	1	6.4904	3.31723	0.194073	5.17718	8.06602	0.598214	2.91972	3.02068	0.516244	5.86817	20.6101	0.612016	1.3197	10.2364	0.851448	16.2459	14.6274	3.43732e-06	2.96438	5.59837	0.652608	UGCUUCCUUUCAGAGGGU	experimental		mature miRNA	standard	MIMAT0006778,MIMAT0002860	hsa-miR-516a-3p	hsa-miR-516a-3p, hsa-miR-516b-3p
551	hsa-miR-516a-5p	0.0617766	8.3618	1	7.07197	3.43544	0.12672	6.6685	4.13812	0.239377	4.73474	3.46232	0.490314	0.00181889	19.819	1	6.53771	9.0686	0.366024	14.0017	27.3465	0.0198807	0.0165139	7.19192	1	UUCUCGAGGAAAGAAGCACUUUC	experimental		mature miRNA	standard	MIMAT0004770	hsa-miR-516a-5p	hsa-miR-516a-5p
552	hsa-miR-516b-5p	0.0651387	4.42212	1	12.9149	5.30417	0.127164	0.0104103	4.87974	1	0.308103	2.31259	0.967931	0.00175365	20.0622	1	1.03038	5.93545	0.83829	7.97357	16.6053	0.00164772	3.56467	6.23342	0.683274	AUCUGGAGGUAAGAAGCACUUU	experimental		mature miRNA	standard	MIMAT0002859	hsa-miR-516b-5p	hsa-miR-516b-5p
553	hsa-miR-517-5p	0.0628337	3.7021	1	13.3372	4.04448	0.015155	4.25669	5.49124	0.571387	6.76995	3.81647	0.33679	0.00182875	15.9862	1	3.59318	7.47375	0.55621	14.8353	18.2907	0.000313243	0.0159071	3.64697	1	CCUCUAGAUGGAAGCACUGUCU	experimental		mature miRNA	standard	MIMAT0002851	hsa-miR-517-5p	hsa-miR-517-5p
554	hsa-miR-517a-3p	2.49796	5.62346	0.812627	11.7387	4.28064	0.147901	2.79826	4.0089	0.659235	13.5965	3.21817	0.0143648	0.00261811	17.0466	1	6.72468	9.56679	0.397335	15.3572	18.6914	0.00114958	4.37668	5.12923	0.651983	AUCGUGCAUCCCUUUAGAGUGU	experimental		mature miRNA	standard	MIMAT0002852,MIMAT0002857	hsa-miR-517a-3p	hsa-miR-517a-3p, hsa-miR-517b-3p
555	hsa-miR-517c-3p	0.0672397	3.72038	1	0.00991583	3.77022	1	3.28182	5.82145	0.666385	4.81873	3.30716	0.558856	0.00166826	18.5223	1	9.91478	7.29024	0.13257	10.1013	15.2187	5.87913e-05	0.0226754	5.35043	1	AUCGUGCAUCCUUUUAGAGUGU	experimental		mature miRNA	standard	MIMAT0002866	hsa-miR-517c-3p	hsa-miR-517c-3p
556	hsa-miR-518a-3p	0.0947842	5.20719	1	1.12634	3.30501	0.770203	0.0110513	5.85823	1	4.92604	2.22865	0.394189	0.00144806	16.0449	1	0.0138788	11.8881	1	3.86803	11.7608	0.00219426	0.0160908	7.44299	1	GAAAGCGCUUCCCUUUGCUGGA	experimental		mature miRNA	standard	MIMAT0002863	hsa-miR-518a-3p	hsa-miR-518a-3p
557	hsa-miR-518a-5p	0.0641606	5.44465	1	2.63988	3.32743	0.542122	6.6301	4.79295	0.304548	1.31197	2.86235	0.85924	0.00172155	14.0635	1	9.7795	15.3707	0.43624	5.6187	13.6012	0.00949257	0.0172756	5.33824	1	CUGCAAAGGGAAGCCCUUUC	experimental		mature miRNA	standard	MIMAT0005457,MIMAT0002862	hsa-miR-518a-5p	hsa-miR-518a-5p, hsa-miR-527
558	hsa-miR-518b	1.43215	4.37587	0.861168	8.91809	3.45103	0.097193	5.31409	5.05256	0.428177	0.293081	3.30882	0.968651	9.85973	17.9209	0.38489	5.09205	6.57422	0.279028	10.5741	18.1762	0.00676409	3.76799	5.12583	0.592995	CAAAGCGCUCCCCUUUAGAGGU	experimental		mature miRNA	standard	MIMAT0002844	hsa-miR-518b	hsa-miR-518b
559	hsa-miR-518c-3p	0.96242	6.59331	0.954889	7.06369	3.05693	0.166074	9.45144	4.17776	0.0959106	0.0407152	3.18826	1	0.00204208	20.8582	1	6.42447	7.35772	0.281477	4.9519	14.4733	0.027632	8.6895	8.87944	0.561916	CAAAGCGCUUCUCUUUAGAGUGU	experimental		mature miRNA	standard	MIMAT0002848	hsa-miR-518c-3p	hsa-miR-518c-3p
560	hsa-miR-518c-5p	3.44167	5.43243	0.645392	7.95937	2.48593	0.0643562	4.46388	4.26006	0.472693	3.52311	2.69675	0.418116	16.7788	18.7157	0.244426	7.61367	12.7984	0.41098	11.4408	14.1669	0.000797023	5.09006	4.91824	0.485133	UCUCUGGAGGGAAGCACUUUCUG	experimental		mature miRNA	standard	MIMAT0002847	hsa-miR-518c-5p	hsa-miR-518c-5p
561	hsa-miR-518d-3p	0.0416199	4.73324	1	2.8488	4.21416	0.671311	2.37444	5.38724	0.722024	4.42957	1.90167	0.124214	4.87973	16.805	0.60705	6.60304	5.7879	0.084713	8.04742	15.8978	0.0097971	3.22366	7.32877	0.73033	CAAAGCGCUUCCCUUUGGAGC	experimental		mature miRNA	standard	MIMAT0002864	hsa-miR-518d-3p	hsa-miR-518d-3p
562	hsa-miR-518d-5p	0.748682	5.18322	0.96416	0.00959804	3.76418	1	4.89254	4.28374	0.400747	2.61074	2.50658	0.65137	2.15749	9.13183	0.584353	9.96447	6.85672	0.10171	5.30045	17.7904	0.0427725	0.0208221	6.97346	1	CUCUAGAGGGAAGCACUUUCUG	experimental		mature miRNA	standard	MIMAT0005456,MIMAT0005455,MIMAT0002845	hsa-miR-518d-5p	hsa-miR-518d-5p, hsa-miR-520c-5p, hsa-miR-526a
563	hsa-miR-518e-3p	0.044618	5.7163	1	3.77428	3.52423	0.444837	7.05623	3.91618	0.108416	0.0296823	2.17013	1	2.07277	16.4971	0.769943	7.75627	8.02415	0.133135	8.41389	8.90571	9.35627e-08	4.61375	8.32044	0.646491	AAAGCGCUUCCCUUCAGAGUG	experimental		mature miRNA	standard	MIMAT0002861	hsa-miR-518e-3p	hsa-miR-518e-3p
564	hsa-miR-518e-5p	0.972237	5.3213	0.944116	2.96135	3.52987	0.531122	8.44672	4.06868	0.159955	11.0312	2.05834	0.000293675	3.42395	14.9941	0.663371	8.73396	13.2406	0.405212	8.11316	8.87219	1.0989e-05	0.0163055	6.71163	1	CUCUAGAGGGAAGCGCUUUCUG	experimental		mature miRNA	standard	MIMAT0005450,MIMAT0005452,MIMAT0005454,MIMAT0002831,MIMAT0005451,MIMAT0005449	hsa-miR-518e-5p	hsa-miR-518e-5p, hsa-miR-519a-5p, hsa-miR-519b-5p, hsa-miR-519c-5p, hsa-miR-522-5p, hsa-miR-523-5p
565	hsa-miR-518f-3p	7.19959	6.9975	0.645533	4.78296	3.54772	0.305189	3.83347	9.09663	0.774626	0.113385	1.79657	0.987644	0.00181288	14.6957	1	12.3645	11.7181	0.249601	10.0437	10.6634	5.52218e-07	0.0209964	5.91163	1	GAAAGCGCUUCUCUUUAGAGG	experimental		mature miRNA	standard	MIMAT0002842	hsa-miR-518f-3p	hsa-miR-518f-3p
566	hsa-miR-518f-5p	0.0469367	3.99504	1	2.91342	4.40616	0.657318	2.87455	4.12204	0.592015	8.71678	2.4248	0.0152751	0.741637	10.8285	0.872302	13.9635	11.8169	0.0881028	9.35762	9.93307	5.04582e-06	0.276515	4.11838	0.962311	CUCUAGAGGGAAGCACUUUCUC	experimental		mature miRNA	standard	MIMAT0002841	hsa-miR-518f-5p	hsa-miR-518f-5p
567	hsa-miR-519a-3p	0.0499402	5.31351	1	0.0134627	3.3605	1	0.0104609	5.24752	1	8.69423	3.56638	0.19018	3.59491	14.9978	0.637077	8.92248	8.20577	0.154145	4.67983	13.3841	0.008433	8.36898	7.32082	0.479122	AAAGUGCAUCCUUUUAGAGUGU	experimental		mature miRNA	standard	MIMAT0002869	hsa-miR-519a-3p	hsa-miR-519a-3p
568	hsa-miR-519b-3p	0.059211	7.28583	1	0.00912828	2.80062	1	5.60343	8.09208	0.580361	4.00751	2.24089	0.370156	2.98052	14.8845	0.631886	2.80322	11.8091	0.788556	3.26375	14.3355	0.0651741	0.0176771	7.81229	1	AAAGUGCAUCCUUUUAGAGGUU	experimental		mature miRNA	standard	MIMAT0002837	hsa-miR-519b-3p	hsa-miR-519b-3p
569	hsa-miR-519c-3p	0.0596927	6.60921	1	1.1596	2.75411	0.753437	0.00940421	6.51667	1	0.0378537	3.63975	1	1.29889	15.8671	0.821718	9.82298	11.6562	0.240442	4.15112	13.4586	0.0117989	1.31648	8.41005	0.905063	AAAGUGCAUCUUUUUAGAGGAU	experimental		mature miRNA	standard	MIMAT0002832	hsa-miR-519c-3p	hsa-miR-519c-3p
570	hsa-miR-519d-3p	4.65136	4.14144	0.639492	2.05711	3.15666	0.635899	0.0128953	6.0104	1	6.09491	3.72804	0.429866	3.98052	12.6281	0.53153	5.26884	8.09007	0.477458	3.8673	16.0691	0.101134	0.0172873	3.83641	1	CAAAGUGCCUCCCUUUAGAGUG	experimental		mature miRNA	standard	MIMAT0002853	hsa-miR-519d-3p	hsa-miR-519d-3p
571	hsa-miR-519d-5p	11.0057	6.36707	0.459883	0.00915937	4.04157	1	0.0113234	4.71355	1	0.0513607	2.46422	1	3.47819	15.5805	0.576663	6.81417	7.58952	0.388685	2.0404	13.1625	0.0927578	0.0219369	4.83868	1	CCUCCAAAGGGAAGCGCUUUCUGUU	experimental		mature miRNA	standard	MIMAT0026610	hsa-miR-519d-5p	hsa-miR-519d-5p
572	hsa-miR-519e-3p	7.66113	6.48246	0.629067	0.550792	2.8523	0.835511	3.6953	6.96175	0.676789	0.0381511	3.56864	1	6.38939	15.4381	0.331012	0.0136699	5.22833	1	3.11574	13.8008	0.0408611	0.0156804	6.8495	1	AAGUGCCUCCUUUUAGAGUGUU	experimental		mature miRNA	standard	MIMAT0002829	hsa-miR-519e-3p	hsa-miR-519e-3p
573	hsa-miR-519e-5p	0.085688	7.75143	1	1.29589	5.44047	0.853504	0.0115714	7.22243	1	8.36383	3.36951	0.291414	0.00158351	18.2722	1	0.233142	9.52229	0.982928	2.92103	11.9012	0.0259374	0.0169635	4.16273	1	UUCUCCAAAAGGGAGCACUUUC	experimental		mature miRNA	standard	MIMAT0002828	hsa-miR-519e-5p	hsa-miR-519e-5p
574	hsa-miR-520a-3p	6.02924	7.31729	0.761034	0.00962884	3.4624	1	2.26545	4.79428	0.73372	0.0573105	3.96205	1	0.00159286	12.7867	1	9.40755	8.55053	0.311516	3.0866	10.9757	0.00909881	0.0275124	3.85471	1	AAAGUGCUUCCCUUUGGACUGU	experimental		mature miRNA	standard	MIMAT0002834	hsa-miR-520a-3p	hsa-miR-520a-3p
575	hsa-miR-520a-5p	0.0771629	4.52598	1	0.00972797	3.94232	1	0.0107404	3.01898	1	5.4023	3.60953	0.544037	0.26655	14.5041	0.948774	1.54501	8.22569	0.853498	2.37735	14.0691	0.0820479	0.0186556	5.60913	1	CUCCAGAGGGAAGUACUUUCU	experimental		mature miRNA	standard	MIMAT0002833	hsa-miR-520a-5p	hsa-miR-520a-5p
576	hsa-miR-520b	0.0487556	6.1746	1	0.0105574	3.78399	1	2.93974	4.2	0.511739	0.0352709	3.36267	1	9.35776	17.3609	0.276653	2.91019	6.72887	0.577024	2.41891	12.7992	0.0685996	6.66998	5.57858	0.419967	AAAGUGCUUCCUUUUAGAGGG	experimental		mature miRNA	standard	MIMAT0002843	hsa-miR-520b	hsa-miR-520b
577	hsa-miR-520c-3p	5.93249	3.89844	0.558731	2.2845	3.1863	0.54148	0.0112522	3.99264	1	0.0418868	1.32466	1	8.17697	14.6965	0.233035	3.18937	13.0633	0.79454	2.36833	13.1884	0.105772	0.0157166	5.11144	1	AAAGUGCUUCCUUUUAGAGGGU	experimental		mature miRNA	standard	MIMAT0002846	hsa-miR-520c-3p	hsa-miR-520c-3p
578	hsa-miR-520d-3p	0.0557728	6.92062	1	0.0106987	5.30304	1	0.118611	5.29095	0.981722	0.0392145	4.13476	1	5.57135	14.3528	0.377264	2.36004	7.67742	0.708701	1.84843	9.43103	0.0293741	4.94038	5.45521	0.547324	AAAGUGCUUCUCUUUGGUGGGU	experimental		mature miRNA	standard	MIMAT0002856	hsa-miR-520d-3p	hsa-miR-520d-3p
579	hsa-miR-520d-5p	0.0522696	6.14017	1	0.0134893	4.04019	1	7.21851	4.64928	0.254461	6.33193	3.46701	0.426399	0.00203418	23.3674	1	5.99214	11.0947	0.542573	2.248	11.5999	0.0970129	3.19233	5.25516	0.774521	CUACAAAGGGAAGCCCUUUC	experimental		mature miRNA	standard	MIMAT0002855	hsa-miR-520d-5p	hsa-miR-520d-5p
580	hsa-miR-520e	0.0525846	3.19964	1	4.78294	5.35565	0.544896	4.11876	5.64782	0.561808	5.60436	3.47215	0.309155	0.670956	23.7123	0.942733	0.0107699	9.85624	1	2.87469	17.0912	0.194891	2.44146	6.69631	0.761119	AAAGUGCUUCCUUUUUGAGGG	experimental		mature miRNA	standard	MIMAT0002825	hsa-miR-520e	hsa-miR-520e
581	hsa-miR-520f-3p	1.4171	5.46499	0.902053	0.0149075	4.03356	1	0.529395	4.12664	0.928213	12.4937	2.11321	0.00180195	1.63021	14.6958	0.834608	10.5039	8.79786	0.179367	1.05995	15.5346	0.537201	5.95576	3.25495	0.376495	AAGUGCUUCCUUUUAGAGGGUU	experimental		mature miRNA	standard	MIMAT0002830	hsa-miR-520f-3p	hsa-miR-520f-3p
582	hsa-miR-520f-5p	0.058739	3.69483	1	0.0118101	4.15261	1	0.00929901	3.21838	1	0.0434557	3.03279	1	2.44342	18.5703	0.739062	4.1522	12.91	0.697316	0.96174	13.2318	0.334976	9.89365	5.30547	0.220478	CCUCUAAAGGGAAGCGCUUUCU	experimental		mature miRNA	standard	MIMAT0026609	hsa-miR-520f-5p	hsa-miR-520f-5p
583	hsa-miR-520g-3p	0.0463214	4.7101	1	0.0109071	3.51065	1	5.02639	5.07001	0.364907	0.0351504	3.65904	1	5.96399	18.867	0.506518	10.3154	9.92102	0.151624	2.80848	14.1675	0.0778582	7.43519	7.68576	0.527365	ACAAAGUGCUUCCCUUUAGAGUGU	experimental		mature miRNA	standard	MIMAT0002858	hsa-miR-520g-3p	hsa-miR-520g-3p
584	hsa-miR-520g-5p	2.65863	7.04528	0.796776	0.0140211	3.82056	1	11.7424	3.98989	0.042088	5.32497	2.07982	0.166565	8.93105	19.3147	0.504512	10.1143	9.32613	0.184137	5.18491	15.9238	0.0518928	15.5405	6.04952	0.181963	UCUAGAGGAAGCACUUUCUGUUU	experimental		mature miRNA	standard	MIMAT0026611	hsa-miR-520g-5p	hsa-miR-520g-5p
585	hsa-miR-520h	0.054125	4.37506	1	0.0145571	3.93821	1	1.1943	5.01028	0.858649	7.41985	2.28412	0.174153	0.00205559	20.0137	1	5.76855	8.80822	0.474592	0.929748	10.4633	0.347629	5.56568	3.97633	0.502795	ACAAAGUGCUUCCCUUUAGAGU	experimental		mature miRNA	standard	MIMAT0002867	hsa-miR-520h	hsa-miR-520h
586	hsa-miR-521	0.0514641	5.15823	1	0.0134197	4.01543	1	3.38984	7.25879	0.707706	0.528973	2.42025	0.947779	0.0019254	25.359	1	9.79274	7.75573	0.127819	3.25789	9.18483	0.00277322	15.1854	6.41929	0.220989	AACGCACUUCCCUUUAGAGUGU	experimental		mature miRNA	standard	MIMAT0002854	hsa-miR-521	hsa-miR-521
587	hsa-miR-522-3p	0.0621101	7.57329	1	0.0149252	6.13079	1	0.0127216	6.11647	1	264.117	30.2474	1.28631e-14	0.0021323	13.5574	1	9.19822	5.55743	0.0789724	2.03963	12.9521	0.160829	0.776021	5.06604	0.945859	AAAAUGGUUCCCUUUAGAGUGU	experimental		mature miRNA	standard	MIMAT0002868	hsa-miR-522-3p	hsa-miR-522-3p
588	hsa-miR-523-3p	0.0586231	4.36284	1	2.50909	4.68565	0.717207	0.01009	6.76581	1	4.11073	2.42773	0.343801	7.98053	16.1039	0.340874	0.0107124	7.66894	1	2.92727	12.3894	0.0376783	5.15142	3.9823	0.244549	GAACGCGCUUCCCUAUAGAGGGU	experimental		mature miRNA	standard	MIMAT0002840	hsa-miR-523-3p	hsa-miR-523-3p
589	hsa-miR-524-3p	0.0479626	5.60852	1	3.00355	5.33955	0.743611	0.0107611	6.212	0.999892	7.63291	4.05938	0.23623	11.3746	19.3064	0.342397	3.99728	15.3872	0.713991	3.12769	14.9542	0.135612	4.83412	7.80504	0.612801	GAAGGCGCUUCCCUUUGGAGU	experimental		mature miRNA	standard	MIMAT0002850	hsa-miR-524-3p	hsa-miR-524-3p
590	hsa-miR-524-5p	0.056101	6.31878	1	0.0129919	3.20007	1	0.0108462	4.59882	1	14.1275	2.57488	0.00280825	0.839407	16.5523	0.900505	3.86848	7.28155	0.533679	2.80995	21.504	0.248608	2.3267	5.52568	0.808857	CUACAAAGGGAAGCACUUUCUC	experimental		mature miRNA	standard	MIMAT0002849	hsa-miR-524-5p	hsa-miR-524-5p
591	hsa-miR-525-3p	0.0729711	4.73111	1	0.00823322	4.7948	1	0.73781	4.74395	0.892625	6.12373	3.44165	0.358819	6.06282	20.3024	0.476552	0.0131314	9.70957	1	2.14688	13.948	0.100024	0.0157907	4.81465	1	GAAGGCGCUUCCCUUUAGAGCG	experimental		mature miRNA	standard	MIMAT0002839	hsa-miR-525-3p	hsa-miR-525-3p
592	hsa-miR-525-5p	0.0610293	5.05066	1	0.0151697	3.61856	1	0.0114317	4.94322	1	12.0125	3.17486	0.107711	0.00199256	15.652	1	1.18537	6.76446	0.86304	1.53363	13.8041	0.227695	17.9567	7.20371	0.187388	CUCCAGAGGGAUGCACUUUCU	experimental		mature miRNA	standard	MIMAT0002838	hsa-miR-525-5p	hsa-miR-525-5p
593	hsa-miR-526b-3p	0.601696	8.00029	0.97959	0.0113077	3.82861	1	1.06771	2.50414	0.716412	0.0405945	2.67814	0.99724	5.41245	17.2889	0.517783	7.68462	9.73505	0.34802	1.30808	7.93811	0.0797939	3.50753	5.09612	0.699974	GAAAGUGCUUCCUUUUAGAGGC	experimental		mature miRNA	standard	MIMAT0002836	hsa-miR-526b-3p	hsa-miR-526b-3p
594	hsa-miR-526b-5p	0.0465489	3.97925	1	0.0133079	4.77277	1	2.22249	8.77765	0.842028	7.13938	1.98346	0.0578411	0.311112	11.6199	0.944246	6.4605	8.51243	0.343987	2.52943	16.4961	0.214015	5.6281	6.17861	0.609466	CUCUUGAGGGAAGCACUUUCUGU	experimental		mature miRNA	standard	MIMAT0002835	hsa-miR-526b-5p	hsa-miR-526b-5p
595	hsa-miR-532-3p	24.8356	11.5645	0.0143174	39.666	8.76186	0.0139641	13.2102	8.92975	0.394036	17.9849	3.84133	0.000661432	1.27287	21.7667	0.929739	12.2927	15.5517	0.314753	4.11459	19.2507	0.327792	11.8921	5.79431	0.227159	CCUCCCACACCCAAGGCUUGCA	experimental		mature miRNA	standard	MIMAT0004780	hsa-miR-532-3p	hsa-miR-532-3p
596	hsa-miR-532-5p	48.1666	12.7942	0.000191708	99.1948	15.5118	2.01562e-07	39.4375	15.4875	0.107089	31.9905	9.52302	0.00468499	20.3343	23.7696	0.280118	4.50665	14.4326	0.709789	13.9593	11.2176	2.97344e-05	0.0163379	4.18954	1	CAUGCCUUGAGUGUAGGACCGU	experimental		mature miRNA	standard	MIMAT0002888	hsa-miR-532-5p	hsa-miR-532-5p
597	hsa-miR-539-3p	0.0585546	5.35853	1	4.32284	3.7284	0.501843	6.85738	6.9182	0.489026	15.308	4.61895	0.0551191	0.00203917	18.7302	1	0.0126889	8.51341	1	0.428754	12.394	0.697297	2.87303	6.76265	0.775935	AUCAUACAAGGACAAUUUCUUU	experimental		mature miRNA	standard	MIMAT0022705	hsa-miR-539-3p	hsa-miR-539-3p
598	hsa-miR-539-5p	0.0535458	6.65049	1	5.00574	4.37444	0.563208	0.160462	7.33429	0.986808	13.0058	4.23296	0.101822	0.00221968	13.4697	1	3.54972	10.4988	0.688439	0.998354	14.1916	0.532619	5.28936	4.99778	0.505241	GGAGAAAUUAUCCUUGGUGUGU	experimental		mature miRNA	standard	MIMAT0003163	hsa-miR-539-5p	hsa-miR-539-5p
599	hsa-miR-541-3p	0.0903163	5.84894	1	0.00845404	3.80477	1	0.0100561	3.7338	1	1.40281	2.87016	0.87218	1.12393	8.75188	0.668963	0.0142781	9.02019	1	0.799685	10.1987	0.224041	0.0162913	7.69674	1	UGGUGGGCACAGAAUCUGGACU	experimental		mature miRNA	standard	MIMAT0004920	hsa-miR-541-3p	hsa-miR-541-3p
600	hsa-miR-541-5p	0.0640197	7.29449	1	0.513146	3.41543	0.883579	1.99818	8.91992	0.843227	0.0359078	2.26593	1	3.09973	18.8601	0.659759	6.49535	13.7545	0.548814	1.39553	16.1237	0.38795	0.0139967	7.42748	1	AAAGGAUUCUGCUGUCGGUCCCACU	experimental		mature miRNA	standard	MIMAT0004919	hsa-miR-541-5p	hsa-miR-541-5p
601	hsa-miR-542-3p	2.56103	5.23758	0.887974	0.29344	3.41319	0.960976	0.0315051	5.47091	0.997176	8.24009	2.93182	0.365889	0.320268	11.7473	0.940489	1.25549	5.39217	0.874072	0.000255438	11.635	1	0.0208998	6.32609	1	UGUGACAGAUUGAUAACUGAAA	experimental		mature miRNA	standard	MIMAT0003389	hsa-miR-542-3p	hsa-miR-542-3p
602	hsa-miR-542-5p	0.0708513	6.04296	1	5.39756	5.95998	0.644816	3.57879	7.52532	0.785472	7.70381	2.77472	0.315927	0.00195044	17.4358	1	3.53991	10.2095	0.769971	0.000304612	15.4927	1	0.0181872	4.433	1	UCGGGGAUCAUCAUGUCACGAGA	experimental		mature miRNA	standard	MIMAT0003340	hsa-miR-542-5p	hsa-miR-542-5p
603	hsa-miR-543	0.0411982	4.81268	1	0.985	5.72042	0.941424	11.9159	4.97221	0.142893	18.7376	4.17527	0.00572481	7.93885	10.9942	0.293287	7.42669	11.4231	0.469116	0.000366502	14.4854	1	6.12928	5.32091	0.428294	AAACAUUCGCGGUGCACUUCUU	experimental		mature miRNA	standard	MIMAT0004954	hsa-miR-543	hsa-miR-543
604	hsa-miR-544a	0.0523324	4.1278	1	2.10485	4.43921	0.854813	2.91332	7.20153	0.814817	11.194	4.21782	0.281396	0.002425	12.839	1	7.82939	6.92355	0.273587	0.000323708	17.4446	1	5.86737	7.67108	0.669554	AUUCUGCAUUUUUAGCAAGUUC	experimental		mature miRNA	standard	MIMAT0003164	hsa-miR-544a	hsa-miR-544a
605	hsa-miR-544b	0.0706611	6.44866	1	1.44195	4.22752	0.852553	6.75267	7.11449	0.574883	1.6887	3.20391	0.887116	0.00184952	19.8547	1	10.3557	7.21812	0.199725	0.000285924	18.3057	1	0.0193907	6.39913	1	ACCUGAGGUUGUGCAUUUCUAA	experimental		mature miRNA	standard	MIMAT0015004	hsa-miR-544b	hsa-miR-544b
606	hsa-miR-545-3p	0.0449676	4.40489	1	7.84757	4.69404	0.458472	7.95146	7.17967	0.476229	1.11896	2.50616	0.863308	3.34802	12.8368	0.640464	7.25742	12.4706	0.506024	0.000346512	12.9154	1	4.23875	3.83448	0.401566	UCAGCAAACAUUUAUUGUGUGC	experimental		mature miRNA	standard	MIMAT0003165	hsa-miR-545-3p	hsa-miR-545-3p
607	hsa-miR-545-5p	0.0647769	6.74141	1	20.2797	4.04464	0.0122068	11.1877	7.15803	0.377102	16.6768	5.18246	0.130697	0.00211185	12.5167	1	0.441534	5.6696	0.951776	0.000324982	20.8319	1	0.0911198	5.90695	0.992493	UCAGUAAAUGUUUAUUAGAUGA	experimental		mature miRNA	standard	MIMAT0004785	hsa-miR-545-5p	hsa-miR-545-5p
608	hsa-miR-548a-3p	0.0416965	4.62672	1	1.42397	3.98647	0.878486	7.61228	4.93123	0.333129	4.99877	2.32178	0.303313	7.95547	16.9804	0.481713	16.6443	14.5068	0.178937	0.0003582	20.0198	1	6.43851	7.22582	0.531089	CAAAACUGGCAAUUACUUUUGC	experimental		mature miRNA	standard	MIMAT0003251	hsa-miR-548a-3p	hsa-miR-548a-3p
609	hsa-miR-548a-5p	2.63059	6.10211	0.866164	0.0138254	2.68514	1	20.012	6.81701	0.0866955	1.02099	2.44831	0.911434	4.1569	17.815	0.64692	10.3531	7.39061	0.249967	0.000277471	11.9296	1	0.0231312	6.17483	1	AAAAGUAAUUGCGAGUUUUACC	experimental		mature miRNA	standard	MIMAT0004803	hsa-miR-548a-5p	hsa-miR-548a-5p
610	hsa-miR-548b-3p	7.26172	6.5268	0.349193	19.8315	6.0942	0.229163	1.44556	7.31979	0.920781	24.058	5.29492	0.00639142	12.8642	18.2338	0.428942	24.2026	12.3372	0.0372678	0.000460993	13.7961	1	11.7412	5.74797	0.215128	CAAGAACCUCAGUUGCUUUUGU	experimental		mature miRNA	standard	MIMAT0003254	hsa-miR-548b-3p	hsa-miR-548b-3p
611	hsa-miR-548b-5p	0.0393928	4.55856	1	16.0147	4.88892	0.172612	12.176	5.95656	0.20907	7.23036	4.4821	0.369074	7.26345	26.7754	0.694805	12.8859	10.4879	0.132403	0.000406408	11.8895	1	8.04854	5.2352	0.227638	AAAAGUAAUUGUGGUUUUGGCC	experimental		mature miRNA	standard	MIMAT0004798	hsa-miR-548b-5p	hsa-miR-548b-5p
612	hsa-miR-548c-3p	0.0424933	4.10949	1	0.66635	2.91096	0.92605	11.2754	7.28876	0.35072	9.57749	4.29123	0.288843	0.318041	28.4136	0.98054	17.2993	9.82404	0.0508426	0.000350417	17.8384	1	14.4109	9.52766	0.341592	CAAAAAUCUCAAUUACUUUUGC	experimental		mature miRNA	standard	MIMAT0003285	hsa-miR-548c-3p	hsa-miR-548c-3p
613	hsa-miR-548d-3p	0.0482975	4.7586	1	3.20349	6.29865	0.69892	1.62839	5.3635	0.784583	3.71437	3.52828	0.451922	26.7181	20.9698	0.0488792	0.00947165	10.1829	1	24.59	15.783	2.87182e-10	3.85871	7.06088	0.603778	CAAAAACCACAGUUUCUUUUGC	experimental		mature miRNA	standard	MIMAT0003323	hsa-miR-548d-3p	hsa-miR-548d-3p
614	hsa-miR-548d-5p	0.0416548	4.58383	1	4.98845	3.40604	0.323802	4.78074	5.45388	0.465066	1.99911	3.66305	0.729362	3.8669	18.9935	0.699864	4.21739	10.519	0.530581	30.3148	26.031	9.93987e-05	2.75852	5.17971	0.66249	AAAAGUAAUUGUGGUUUUUGCC	experimental		mature miRNA	standard	MIMAT0004812	hsa-miR-548d-5p	hsa-miR-548d-5p
615	hsa-miR-548e-3p	0.0506938	5.06127	1	0.486123	2.21981	0.873793	0.0101701	8.16127	1	8.18003	2.30203	0.0219569	13.3061	12.89	0.0835319	5.60469	7.36664	0.271669	24.6327	21.5688	4.50288e-06	1.23855	6.22448	0.881392	AAAAACUGAGACUACUUUUGCA	experimental		mature miRNA	standard	MIMAT0005874	hsa-miR-548e-3p	hsa-miR-548e-3p
616	hsa-miR-548e-5p	0.0510191	4.11944	1	0.0119778	4.18777	1	0.00983685	4.37082	1	7.21537	3.74284	0.276782	9.85715	21.645	0.416559	2.18929	7.20364	0.696432	19.1504	21.6448	1.50363e-05	6.75072	6.78227	0.513683	CAAAAGCAAUCGCGGUUUUUGC	experimental		mature miRNA	standard	MIMAT0026736	hsa-miR-548e-5p	hsa-miR-548e-5p
617	hsa-miR-548f-3p	0.0630831	3.85611	1	2.41172	3.34322	0.559877	0.00935403	6.87408	1	1.30029	3.71888	0.859969	14.9698	22.0037	0.195738	0.0102917	6.32665	1	15.1118	22.7491	0.00023707	1.09639	5.97446	0.864526	AAAAACUGUAAUUACUUUU	experimental		mature miRNA	standard	MIMAT0005895	hsa-miR-548f-3p	hsa-miR-548f-3p
618	hsa-miR-548f-5p	0.0789725	5.47358	1	0.00778474	5.30936	1	0.00893368	6.32888	1	0.0436015	2.65963	1	1.64165	21.038	0.797889	5.39612	10.8098	0.557973	11.1543	14.4679	4.61872e-08	0.0168016	7.65429	1	UGCAAAAGUAAUCACAGUUUUU	experimental		mature miRNA	standard	MIMAT0026739	hsa-miR-548f-5p	hsa-miR-548f-5p
619	hsa-miR-548g-3p	0.0774731	7.88193	1	3.1139	4.06945	0.435528	0.00885992	6.25608	1	0.0345079	2.996	1	8.018	15.9642	0.20121	0.425965	11.0957	0.964076	15.891	11.2025	1.86951e-15	0.0114639	6.35492	1	AAAACUGUAAUUACUUUUGUAC	experimental		mature miRNA	standard	MIMAT0005912	hsa-miR-548g-3p	hsa-miR-548g-3p
620	hsa-miR-548h-3p	5.33097	9.00971	0.583511	11.3768	5.98453	0.280562	11.2622	6.13193	0.223713	18.2531	7.3938	0.0323443	45.7256	20.4737	0.0161086	10.2842	6.79621	0.0266909	41.6839	19.7469	1.10287e-07	5.96233	7.39148	0.585882	CAAAAACCGCAAUUACUUUUGCA	experimental		mature miRNA	standard	MIMAT0022723,MIMAT0018446	hsa-miR-548h-3p	hsa-miR-548h-3p, hsa-miR-548z
621	hsa-miR-548h-5p	0.0761795	4.05304	1	0.00749667	4.73094	1	0.00869806	8.98994	1	0.0404602	2.7884	1	13.2536	60.9109	0.607447	4.11816	10.3668	0.633072	12.409	19.732	2.10666e-05	0.0156399	6.46449	1	AAAAGUAAUCGCGGUUUUUGUC	experimental		mature miRNA	standard	MIMAT0005928	hsa-miR-548h-5p	hsa-miR-548h-5p
622	hsa-miR-548i	0.0686939	4.59996	1	3.92452	3.83235	0.370285	0.00851383	5.08916	1	0.0327902	2.82997	1	9.66917	14.9873	0.13736	0.0101851	7.70478	1	12.6059	24.4369	0.0009281	1.21111	8.41804	0.887141	AAAAGUAAUUGCGGAUUUUGCC	experimental		mature miRNA	standard	MIMAT0005935	hsa-miR-548i	hsa-miR-548i
623	hsa-miR-548j-3p	0.091935	5.13807	1	2.79533	4.64372	0.610158	0.0109118	10.4352	1	7.56796	2.68677	0.204992	0.00147927	18.9974	1	0.0131122	7.41527	1	13.6669	17.1879	2.3051e-06	0.0153224	6.03894	1	CAAAAACUGCAUUACUUUUGC	experimental		mature miRNA	standard	MIMAT0026737	hsa-miR-548j-3p	hsa-miR-548j-3p
624	hsa-miR-548j-5p	0.0497994	8.66489	1	0.0119233	3.33743	1	0.00975475	6.25455	1	7.01306	3.06804	0.184088	27.5762	44.1112	0.343393	2.09472	7.4456	0.714147	17.1926	18.1165	1.47286e-06	7.21138	6.56047	0.455747	AAAAGUAAUUGCGGUCUUUGGU	experimental		mature miRNA	standard	MIMAT0005875	hsa-miR-548j-5p	hsa-miR-548j-5p
625	hsa-miR-548k	0.0538556	5.82854	1	0.0109885	3.1843	1	0.00977449	7.31009	1	4.6356	3.21512	0.447957	23.9792	55.6577	0.484302	4.26246	5.89404	0.342963	15.4628	8.89429	1.9766e-20	1.27982	6.30207	0.89551	AAAAGUACUUGCGGAUUUUGCU	experimental		mature miRNA	standard	MIMAT0005882	hsa-miR-548k	hsa-miR-548k
626	hsa-miR-548l	0.0694208	5.52992	1	3.06708	5.63652	0.598529	0.00897962	13.9634	1	0.0331771	2.35018	1	30.6958	131.601	0.661181	6.23926	12.4921	0.479427	13.2	13.729	5.60356e-08	0.0115669	5.89159	1	AAAAGUAUUUGCGGGUUUUGUC	experimental		mature miRNA	standard	MIMAT0005889	hsa-miR-548l	hsa-miR-548l
627	hsa-miR-548m	0.0698155	4.08085	1	4.41625	3.314	0.392052	0.0106466	8.13516	1	4.45373	4.01759	0.625923	0.0017778	12.4486	1	0.011827	10.4185	1	11.0463	20.1364	0.00062894	4.8151	6.43528	0.591675	CAAAGGUAUUUGUGGUUUUUG	experimental		mature miRNA	standard	MIMAT0005917	hsa-miR-548m	hsa-miR-548m
628	hsa-miR-548n	0.0725456	3.54998	1	0.4266	3.28676	0.883624	0.00866522	7.61599	1	0.0335201	2.40738	1	152.097	49.8462	3.30633e-05	1.06984	10.6977	0.901007	9.60302	18.9258	0.000579027	0.0116927	6.5497	1	CAAAAGUAAUUGUGGAUUUUGU	experimental		mature miRNA	standard	MIMAT0005916	hsa-miR-548n	hsa-miR-548n
629	hsa-miR-548o-3p	0.0988509	5.74428	1	0.00875635	3.42387	1	0.0105194	14.7785	1	5.57853	2.69229	0.469117	0.00135663	22.2814	1	0.0149676	11.5621	1	8.45028	22.7442	0.00211697	0.0201323	8.76015	1	CCAAAACUGCAGUUACUUUUGC	experimental		mature miRNA	standard	MIMAT0005919	hsa-miR-548o-3p	hsa-miR-548o-3p
630	hsa-miR-548p	0.0952296	5.85255	1	0.00657593	3.75849	1	0.00839706	9.12126	1	0.0432631	2.94407	1	1.52017	11.4232	0.619412	0.0128398	9.37753	1	17.0566	83.9802	0.178368	0.0151169	5.23908	1	UAGCAAAAACUGCAGUUACUUU	experimental		mature miRNA	standard	MIMAT0005934	hsa-miR-548p	hsa-miR-548p
631	hsa-miR-548q	11.2943	8.45139	0.640681	14.353	5.2736	0.0358916	0.0128652	7.64481	1	1.68228	3.30915	0.872797	0.00167585	17.7652	1	0.0150675	9.28993	1	10.0809	13.0918	1.59905e-06	0.0182086	10.648	1	GCUGGUGCAAAAGUAAUGGCGG	experimental		mature miRNA	standard	MIMAT0011163	hsa-miR-548q	hsa-miR-548q
632	hsa-miR-548s	0.08965	6.14214	1	1.59374	3.81781	0.650827	0.00891651	10.2664	1	0.0377441	2.26366	1	3.58424	16.3397	0.498949	0.0117995	7.2788	1	4.42159	9.99466	1.73806e-05	0.0114925	7.23723	1	AUGGCCAAAACUGCAGUUAUUUU	experimental		mature miRNA	standard	MIMAT0014987	hsa-miR-548s	hsa-miR-548s
633	hsa-miR-548t-5p	473.7	46.5959	3.88539e-26	0.0113912	3.8984	1	4.05819	20.2567	0.879685	0.0384786	3.44058	1	234.511	53.4746	7.54471e-07	0.0139946	14.1173	1	4.82912	10.0834	0.000193117	69.2539	78.7845	0.585087	CAAAAGUGAUCGUGGUUUUUG	experimental		mature miRNA	standard	MIMAT0015009	hsa-miR-548t-5p	hsa-miR-548t-5p
634	hsa-miR-548u	0.476175	6.88055	0.990291	3.09214	2.80417	0.211271	0.00885649	5.72757	1	0.0339826	3.44464	1	13.3042	85.9236	0.711409	0.0111479	9.71215	1	59.8795	47.4972	7.8215e-05	0.0114799	6.20257	1	CAAAGACUGCAAUUACUUUUGCG	experimental		mature miRNA	standard	MIMAT0015013	hsa-miR-548u	hsa-miR-548u
635	hsa-miR-548v	0.0674957	4.98417	1	2.99106	2.44416	0.173644	20.0509	31.8474	0.566471	0.0289132	2.77897	1	25.343	81.0583	0.529231	0.0107036	11.6783	1	4.18697	17.6754	0.0517633	0.01064	5.30169	1	AGCUACAGUUACUUUUGCACCA	experimental		mature miRNA	standard	MIMAT0015020	hsa-miR-548v	hsa-miR-548v
636	hsa-miR-548w	40.0419	43.8581	0.260774	72.2087	14.4202	0.00153683	1.84662	8.18054	0.890251	16.5161	8.57933	0.117406	49.9958	22.7534	0.0275271	25.5276	15.0762	0.0176185	23.5394	17.2417	8.63811e-05	12.2084	6.94047	0.248302	AAAAGUAACUGCGGUUUUUGCCU	experimental		mature miRNA	standard	MIMAT0015060	hsa-miR-548w	hsa-miR-548w
637	hsa-miR-548x-3p	0.0864442	4.13248	1	0.837733	3.67912	0.826592	0.0101363	7.99915	1	1.80481	2.19943	0.740824	0.367931	14.3936	0.925567	0.0125878	7.92796	1	4.39901	15.9474	0.0133314	0.0134504	6.18507	1	UAAAAACUGCAAUUACUUUC	experimental		mature miRNA	standard	MIMAT0015081	hsa-miR-548x-3p	hsa-miR-548x-3p
638	hsa-miR-548y	7.78585	10.0741	0.831529	4.61347	2.8834	0.177734	0.0118062	6.19402	1	0.0554071	2.27975	1	0.00141153	13.4721	1	0.015776	8.16622	1	2.20635	13.4088	0.0679388	0.0181688	8.15171	1	AAAAGUAAUCACUGUUUUUGCC	experimental		mature miRNA	standard	MIMAT0018354	hsa-miR-548y	hsa-miR-548y
639	hsa-miR-548aa	0.0331461	5.07127	1	12.1694	4.72897	0.179371	16.4424	6.2852	0.0538118	16.571	4.23672	0.000547337	17.01	15.9943	0.172842	13.9144	10.0555	0.0262098	2.09471	13.9028	0.382015	16.8539	5.66018	0.0110731	AAAAACCACAAUUACUUUUGCACCA	experimental		mature miRNA	standard	MIMAT0018447,MIMAT0022730	hsa-miR-548aa	hsa-miR-548aa, hsa-miR-548t-3p
640	hsa-miR-548ba	3.20389	3.29117	0.588716	6.05838	3.18914	0.390952	3.03128	5.51462	0.737919	0.0456329	3.45506	1	9.10826	22.4831	0.528271	21.1889	10.7643	0.036543	0.000330656	11.0379	1	4.52705	6.76267	0.672385	AAAGGUAACUGUGAUUUUUGCU	experimental		mature miRNA	standard	MIMAT0031175	hsa-miR-548ba	hsa-miR-548ba
641	hsa-miR-548ab	0.0449342	6.26344	1	20.2266	4.95163	0.125058	11.4658	6.18016	0.293425	15.5791	2.21624	0.000496216	0.00271608	19.0309	1	6.60636	7.0688	0.328316	0.000381167	16.5093	1	26.2406	13.4305	0.199163	AAAAGUAAUUGUGGAUUUUGCU	experimental		mature miRNA	standard	MIMAT0018928	hsa-miR-548ab	hsa-miR-548ab
642	hsa-miR-548ac	0.0432204	6.76944	1	6.4935	2.52329	0.267169	6.13348	6.0077	0.520637	3.79951	2.59154	0.485814	8.77048	10.1538	0.191894	9.34516	10.482	0.298289	0.000366096	21.149	1	3.63462	4.13004	0.504794	CAAAAACCGGCAAUUACUUUUG	experimental		mature miRNA	standard	MIMAT0018938	hsa-miR-548ac	hsa-miR-548ac
643	hsa-miR-548ad	0.0439705	7.65923	1	2.57363	5.1239	0.827383	8.29931	3.77759	0.166192	5.1464	2.86484	0.384904	5.71754	9.57295	0.336926	2.74771	9.98368	0.770453	0.000343741	17.28	1	6.16591	6.03072	0.451381	GAAAACGACAAUGACUUUUGCA	experimental		mature miRNA	standard	MIMAT0018946	hsa-miR-548ad	hsa-miR-548ad
644	hsa-miR-548ae	0.0447852	5.56042	1	11.6663	2.79462	0.0783488	4.47824	4.48261	0.537088	4.65358	3.37733	0.522088	1.43283	14.658	0.853188	6.88714	11.1254	0.48589	0.000364344	17.1068	1	4.86174	4.84749	0.45673	CAAAAACUGCAAUUACUUUCA	experimental		mature miRNA	standard	MIMAT0018954	hsa-miR-548ae	hsa-miR-548ae
645	hsa-miR-548ag	0.0595707	7.84231	1	0.019305	3.00598	1	2.22732	6.10234	0.829054	13.1469	4.15326	0.260681	0.00217538	13.4973	1	10.3368	9.7071	0.357038	0.000262421	21.616	1	1.49596	4.83841	0.894093	AAAGGUAAUUGUGGUUUCUGC	experimental		mature miRNA	standard	MIMAT0018969	hsa-miR-548ag	hsa-miR-548ag
646	hsa-miR-548ah-3p	1.46396	4.66149	0.885216	17.0359	4.61717	0.190334	2.90544	6.39084	0.818708	9.59077	2.48545	0.138269	0.00291114	15.7738	1	21.1148	7.19773	0.00411677	0.000392829	15.4949	1	13.5068	5.46465	0.194771	CAAAAACUGCAGUUACUUUUGC	experimental		mature miRNA	standard	MIMAT0020957	hsa-miR-548ah-3p	hsa-miR-548ah-3p
647	hsa-miR-548ah-5p	0.0572412	5.98234	1	5.26651	3.16214	0.482533	0.0133574	4.16389	1	2.10163	2.70047	0.794531	1.03808	19.5378	0.906331	3.17922	7.89521	0.687466	0.00027764	19.1617	1	4.73164	4.34634	0.423781	AAAAGUGAUUGCAGUGUUUG	experimental		mature miRNA	standard	MIMAT0018972	hsa-miR-548ah-5p	hsa-miR-548ah-5p
648	hsa-miR-548ai	0.054311	5.47031	1	13.0912	4.13915	0.166578	0.014099	5.86638	1	13.3986	3.7575	0.0669853	8.15966	16.9298	0.440256	14.458	11.8369	0.17023	0.000332043	16.8889	1	0.64941	5.04996	0.922465	AAAGGUAAUUGCAGUUUUUCCC	experimental		mature miRNA	standard	MIMAT0018989,MIMAT0022707	hsa-miR-548ai	hsa-miR-548ai, hsa-miR-570-5p
649	hsa-miR-548aj-3p	0.0640865	6.39855	1	5.14352	2.36578	0.171887	6.69931	6.67009	0.491378	0.0444467	3.05391	1	2.26973	13.7965	0.680133	14.1115	13.2167	0.253889	0.00028382	13.1747	1	0.013945	4.57261	1	UAAAAACUGCAAUUACUUUUA	experimental		mature miRNA	standard	MIMAT0018990	hsa-miR-548aj-3p	hsa-miR-548aj-3p
650	hsa-miR-548aj-5p	0.0511289	4.69587	1	13.275	3.9408	0.165126	0.0136812	5.94537	1	6.37504	1.71468	0.0949645	6.83906	18.4619	0.551804	7.22012	12.4045	0.515943	0.00031978	10.9191	1	5.25407	4.99095	0.405177	UGCAAAAGUAAUUGCAGUUUUUG	experimental		mature miRNA	standard	MIMAT0022739,MIMAT0022722,MIMAT0022733	hsa-miR-548aj-5p	hsa-miR-548aj-5p, hsa-miR-548g-5p, hsa-miR-548x-5p
651	hsa-miR-548ak	1.72752	4.11136	0.763202	37.4838	12.4775	0.0965425	4.36877	6.92295	0.683862	15.5287	4.92339	0.0107638	26.5798	20.7664	0.156057	17.6768	8.8959	0.00404257	3.04408	16.2015	0.345654	12.9354	8.27811	0.250855	AAAAGUAACUGCGGUUUUUGA	experimental		mature miRNA	standard	MIMAT0019013	hsa-miR-548ak	hsa-miR-548ak
652	hsa-miR-548al	0.0493361	3.92755	1	7.08576	3.55575	0.335467	2.67786	4.97904	0.698144	0.041115	2.20316	1	5.15815	23.7652	0.677163	3.65835	5.01845	0.418346	0.000286364	13.4461	1	7.44127	6.27393	0.331216	AACGGCAAUGACUUUUGUACCA	experimental		mature miRNA	standard	MIMAT0019024	hsa-miR-548al	hsa-miR-548al
653	hsa-miR-548am-3p	3.44779	4.48714	0.704605	1.47909	4.04394	0.885547	0.0158267	5.31827	1	13.9698	2.70587	0.0209426	10.1796	14.598	0.332991	0.595594	10.5781	0.965052	0.000301055	11.0136	1	12.3398	3.22101	0.0181932	CAAAAACUGCAGUUACUUUUGU	experimental		mature miRNA	standard	MIMAT0019076	hsa-miR-548am-3p	hsa-miR-548am-3p
654	hsa-miR-548am-5p	4.28212	10.4899	0.753265	20.5162	6.36206	0.172528	5.55002	6.59958	0.645751	2.18828	3.63051	0.78421	338.379	84.2976	0.00010975	10.546	10.923	0.294303	0.000432071	15.0257	1	9.46413	7.29102	0.365863	AAAAGUAAUUGCGGUUUUUGCC	experimental		mature miRNA	standard	MIMAT0022740,MIMAT0004806,MIMAT0022738	hsa-miR-548am-5p	hsa-miR-548am-5p, hsa-miR-548c-5p, hsa-miR-548o-5p
655	hsa-miR-548an	8.53975	5.23039	0.413279	1.12885	4.27621	0.923253	0.0178115	3.88424	1	10.0076	3.44227	0.394954	0.00259949	16.9699	1	6.49299	7.68008	0.523164	0.000292714	12.925	1	4.98232	5.29795	0.692754	AAAAGGCAUUGUGGUUUUUG	experimental		mature miRNA	standard	MIMAT0019079	hsa-miR-548an	hsa-miR-548an
656	hsa-miR-548ao-3p	0.0429926	4.78475	1	5.12066	2.35088	0.354111	4.95026	8.0073	0.696956	5.29076	4.57473	0.561877	10.9337	16.1746	0.325881	6.07625	12.0292	0.564771	0.000361534	15.2285	1	4.99056	4.40133	0.387665	AAAGACCGUGACUACUUUUGCA	experimental		mature miRNA	standard	MIMAT0021030	hsa-miR-548ao-3p	hsa-miR-548ao-3p
657	hsa-miR-548ao-5p	1.82765	5.31495	0.847966	7.93257	2.93958	0.287875	12.9462	6.25718	0.271576	10.0689	3.533	0.156131	2.86187	18.3008	0.813119	9.89433	8.52142	0.239714	0.000416734	13.4602	1	3.8077	5.5954	0.686904	AGAAGUAACUACGGUUUUUGCA	experimental		mature miRNA	standard	MIMAT0021029	hsa-miR-548ao-5p	hsa-miR-548ao-5p
658	hsa-miR-548ap-3p	0.0651575	6.35398	1	9.13638	2.68213	0.103603	1.08349	6.01609	0.904009	0.0564363	2.92522	1	0.00183772	19.73	1	11.0015	10.2343	0.286923	0.000265091	16.2177	1	0.896158	3.77237	0.88447	AAAAACCACAAUUACUUUU	experimental		mature miRNA	standard	MIMAT0021038	hsa-miR-548ap-3p	hsa-miR-548ap-3p
659	hsa-miR-548ap-5p	0.044194	5.68364	1	12.3304	5.97774	0.359302	6.64862	4.07028	0.316371	6.42377	2.83127	0.237973	6.45493	15.8254	0.522617	12.717	6.70801	0.0257863	0.000384937	8.47768	1	1.39269	5.264	0.841928	AAAAGUAAUUGCGGUCUUU	experimental		mature miRNA	standard	MIMAT0021037	hsa-miR-548ap-5p	hsa-miR-548ap-5p
660	hsa-miR-548aq-3p	3.13564	3.92538	0.664154	18.5853	3.47401	0.0486204	11.0509	5.99508	0.363485	10.5595	3.05621	0.169385	0.00293285	15.5578	1	3.74015	6.0113	0.596708	0.000391537	12.9542	1	12.9492	6.67667	0.314845	CAAAAACUGCAAUUACUUUUGC	experimental		mature miRNA	standard	MIMAT0022264	hsa-miR-548aq-3p	hsa-miR-548aq-3p
661	hsa-miR-548aq-5p	0.0522071	4.17776	1	14.9446	2.44456	0.0098491	0.0134687	5.45091	1	3.50981	2.1838	0.517031	5.68362	15.0514	0.524517	5.90487	6.37816	0.30702	0.000310397	13.5103	1	5.46142	5.15418	0.396582	GAAAGUAAUUGCUGUUUUUGCC	experimental		mature miRNA	standard	MIMAT0022263	hsa-miR-548aq-5p	hsa-miR-548aq-5p
662	hsa-miR-548ar-3p	5.0075	5.46123	0.554953	23.127	3.8213	0.0142182	1.39344	6.18817	0.9064	7.56113	2.52265	0.193227	1.26464	17.6159	0.905038	6.67853	8.40117	0.4491	0.000402518	15.9888	1	5.48912	5.8966	0.582199	UAAAACUGCAGUUAUUUUUGC	experimental		mature miRNA	standard	MIMAT0022266	hsa-miR-548ar-3p	hsa-miR-548ar-3p
663	hsa-miR-548ar-5p	0.486022	8.28369	0.9821	15.3424	4.10815	0.184915	13.2844	5.27604	0.191615	14.4117	5.56783	0.242942	0.00291555	17.5506	1	18.1441	9.08699	0.043253	0.000406377	17.8523	1	14.8533	7.52953	0.276499	AAAAGUAAUUGCAGUUUUUGC	experimental		mature miRNA	standard	MIMAT0022265	hsa-miR-548ar-5p	hsa-miR-548ar-5p
664	hsa-miR-548as-3p	0.0458394	4.86851	1	8.71122	3.83942	0.293644	14.5832	6.12881	0.0978329	0.0408547	3.08599	1	1.34083	14.1083	0.83508	7.41376	8.8066	0.32759	0.00030853	15.2994	1	13.087	9.18567	0.258761	UAAAACCCACAAUUAUGUUUGU	experimental		mature miRNA	standard	MIMAT0022268	hsa-miR-548as-3p	hsa-miR-548as-3p
665	hsa-miR-548as-5p	2.44626	6.41987	0.821053	14.126	3.88768	0.127953	19.3645	4.13047	0.0112416	5.78098	3.17353	0.397475	5.09081	14.4207	0.614423	9.40673	10.6839	0.369883	0.000424475	15.3031	1	2.33267	4.68492	0.761853	AAAAGUAAUUGCGGGUUUUGCC	experimental		mature miRNA	standard	MIMAT0022267	hsa-miR-548as-5p	hsa-miR-548as-5p
666	hsa-miR-548at-3p	1.31449	5.77395	0.902301	5.2997	2.6007	0.458213	12.3616	5.2685	0.210476	9.47754	1.94948	0.0216024	0.748717	14.618	0.929045	11.2572	8.32061	0.166717	0.000407357	14.0254	1	16.1577	8.91628	0.278314	CAAAACCGCAGUAACUUUUGU	experimental		mature miRNA	standard	MIMAT0022278	hsa-miR-548at-3p	hsa-miR-548at-3p
667	hsa-miR-548at-5p	0.492468	6.9197	0.975366	0.993127	2.65527	0.879716	27.2779	9.48342	0.0947544	7.64849	3.03372	0.239303	2.05743	15.9348	0.834088	15.7121	15.1011	0.272665	0.000384562	16.5425	1	9.39958	3.93939	0.163826	AAAAGUUAUUGCGGUUUUGGCU	experimental		mature miRNA	standard	MIMAT0022277	hsa-miR-548at-5p	hsa-miR-548at-5p
668	hsa-miR-548au-3p	6.74796	5.69386	0.302151	17.4298	4.68655	0.160532	12.6486	5.48647	0.239307	8.15425	2.93569	0.165738	10.3223	22.1662	0.585836	20.5535	7.84681	0.00503988	0.000463605	17.034	1	14.7844	4.05987	0.0253109	UGGCAGUUACUUUUGCACCAG	experimental		mature miRNA	standard	MIMAT0022292	hsa-miR-548au-3p	hsa-miR-548au-3p
669	hsa-miR-548au-5p	13.4829	8.03318	0.0585245	40.211	6.6501	0.0138955	29.6156	6.2041	0.0133385	30.4243	6.18403	0.000683309	26.3142	16.8167	0.136794	39.7662	12.6241	0.000586183	0.000550077	11.0308	1	21.1487	6.58694	0.0499349	AAAAGUAAUUGCGGUUUUUGC	experimental		mature miRNA	standard	MIMAT0022291	hsa-miR-548au-5p	hsa-miR-548au-5p
670	hsa-miR-548av-3p	0.053968	4.88846	1	14.6914	4.17855	0.192827	0.135673	5.59056	0.98798	9.91262	4.20599	0.358956	0.00246636	16.1331	1	20.1308	8.01969	0.00817894	0.000332527	8.86683	1	7.81909	5.69113	0.401555	AAAACUGCAGUUACUUUUGC	experimental		mature miRNA	standard	MIMAT0022304	hsa-miR-548av-3p	hsa-miR-548av-3p
671	hsa-miR-548av-5p	2.0441	4.78325	0.79345	28.3829	4.74801	0.0134102	4.87373	5.47718	0.630027	2.54942	2.50724	0.681584	3.41853	14.8713	0.738831	22.4401	8.14563	0.00235127	0.000424851	10.264	1	16.6704	5.92752	0.0649874	AAAAGUACUUGCGGAUUU	experimental		mature miRNA	standard	MIMAT0022303	hsa-miR-548av-5p	hsa-miR-548av-5p
672	hsa-miR-548aw	9.61465	5.58448	0.090197	20.3549	6.3204	0.231881	18.7284	7.13269	0.184373	13.384	3.09864	0.0176476	7.81559	14.4456	0.532187	24.2234	12.1422	0.0333014	0.000489068	15.5461	1	21.7527	4.56374	0.00401816	GUGCAAAAGUCAUCACGGUU	experimental		mature miRNA	standard	MIMAT0022471	hsa-miR-548aw	hsa-miR-548aw
673	hsa-miR-548ax	3.12733	5.1893	0.729211	10.9636	3.98539	0.316613	0.0161239	4.0493	1	8.47239	3.38744	0.269337	23.9592	18.0626	0.12418	20.9245	8.73398	0.011163	0.000370891	11.7165	1	12.7725	6.57022	0.20388	AGAAGUAAUUGCGGUUUUGCCA	experimental		mature miRNA	standard	MIMAT0022474	hsa-miR-548ax	hsa-miR-548ax
674	hsa-miR-548ay-3p	5.97157	6.37257	0.449887	10.0829	3.21084	0.258741	14.3477	4.55451	0.110141	8.58321	3.37818	0.235969	1.67336	22.4105	0.911888	23.5066	10.4522	0.0192926	0.00044645	16.2394	1	14.3149	6.14158	0.18364	CAAAACCGCGAUUACUCUUGCA	experimental		mature miRNA	standard	MIMAT0025453	hsa-miR-548ay-3p	hsa-miR-548ay-3p
675	hsa-miR-548ay-5p	3.83895	5.96438	0.692897	733.987	58.8931	1.42389e-25	0.0172997	4.91055	1	22.5492	6.44979	0.0510622	7.36742	13.371	0.489619	16.1087	11.1702	0.11466	0.00045509	12.3623	1	9.64825	6.53837	0.309235	AAAAGUAAUUGUGGUUUUUGC	experimental		mature miRNA	standard	MIMAT0025452	hsa-miR-548ay-5p	hsa-miR-548ay-5p
676	hsa-miR-548az-3p	0.046033	5.42893	1	23.762	4.38206	0.0350999	10.9872	3.31902	0.0644293	16.9892	3.48395	0.0142964	0.00267955	16.3481	1	14.7253	8.98815	0.0761589	0.000391875	14.4518	1	9.30126	4.21068	0.169114	AAAAACUGCAAUCACUUUUGC	experimental		mature miRNA	standard	MIMAT0025457	hsa-miR-548az-3p	hsa-miR-548az-3p
677	hsa-miR-548az-5p	0.0470276	6.94248	1	5.5364	5.3988	0.715988	4.55744	5.59561	0.639415	8.17406	2.77042	0.235485	0.00259116	40.8302	1	17.8359	8.37786	0.0229816	0.000352643	17.8084	1	19.9325	8.86622	0.168813	CAAAAGUGAUUGUGGUUUUUGC	experimental		mature miRNA	standard	MIMAT0025456	hsa-miR-548az-5p	hsa-miR-548az-5p
678	hsa-miR-549a	0.0456783	3.78568	1	326.856	59.6479	3.84903e-07	1.1497	3.47922	0.741198	0.0231575	2.65138	1	228.561	55.8087	2.1477e-06	0.00832437	10.1576	1	4.60804	10.494	0.00258069	24.7356	48.793	0.567628	UGACAACUAUGGAUGAGCUCU	experimental		mature miRNA	standard	MIMAT0003333	hsa-miR-549a	hsa-miR-549a
679	hsa-miR-550a-3-5p	17.9483	7.55759	0.00193511	23.4529	9.57219	0.200385	21.5544	8.88481	0.121466	25.6009	7.4172	0.0016278	116.307	36.5305	0.00203641	23.3882	16.748	0.0475598	20.1157	21.6476	0.00749451	30.934	6.03966	0.000592356	AGUGCCUGAGGGAGUAAGAG	experimental		mature miRNA	standard	MIMAT0020925	hsa-miR-550a-3-5p	hsa-miR-550a-3-5p
680	hsa-miR-550a-3p	22.9944	34.7209	0.527907	9.82229	4.34201	0.158732	3.34629	9.16794	0.793353	0.0343868	3.82178	1	3.15964	20.753	0.783005	8.42625	10.8915	0.317867	9.79383	42.8104	0.264221	7.81764	6.68225	0.45993	UGUCUUACUCCCUCAGGCACAU	experimental		mature miRNA	standard	MIMAT0003257	hsa-miR-550a-3p	hsa-miR-550a-3p
681	hsa-miR-550a-5p	0.724011	4.85276	0.941944	7.04133	5.1264	0.458266	0.0112871	4.26705	1	4.46736	4.79629	0.550698	597.867	108.17	2.15488e-08	6.04007	9.35678	0.346249	6.49684	12.2182	0.00545386	24.6388	43.8177	0.649458	AGUGCCUGAGGGAGUAAGAGCCC	experimental		mature miRNA	standard	MIMAT0004800	hsa-miR-550a-5p	hsa-miR-550a-5p
682	hsa-miR-550b-2-5p	16.7557	6.45151	0.00688389	9.17717	4.3827	0.21097	6.73224	7.11865	0.492976	0.0310354	5.15617	1	24.987	23.5776	0.16763	24.1957	11.1837	0.002407	10.0742	10.7857	1.93209e-05	21.7464	17.0371	0.374754	AUGUGCCUGAGGGAGUAAGACA	experimental		mature miRNA	standard	MIMAT0022737	hsa-miR-550b-2-5p	hsa-miR-550b-2-5p
683	hsa-miR-550b-3p	7.12754	6.84487	0.378948	17.6729	5.73386	0.0710263	2.19526	6.07354	0.794243	0.481367	2.70902	0.934301	9.72646	29.4567	0.638284	2.58585	8.96782	0.701289	14.3398	14.2458	3.42281e-05	30.4263	17.8078	0.206743	UCUUACUCCCUCAGGCACUG	experimental		mature miRNA	standard	MIMAT0018445	hsa-miR-550b-3p	hsa-miR-550b-3p
684	hsa-miR-551a	0.063303	6.77287	1	4.20294	6.93747	0.552896	6.0952	5.78993	0.372265	3.00273	2.94788	0.509267	9.08025	13.3877	0.148573	0.0105375	12.9623	1	20.4439	16.5251	4.43342e-08	0.0113447	7.71304	1	GCGACCCACUCUUGGUUUCCA	experimental		mature miRNA	standard	MIMAT0003214	hsa-miR-551a	hsa-miR-551a
685	hsa-miR-551b-3p	0.0519126	3.69433	1	0.00910342	5.92896	1	4.35597	3.94575	0.290029	0.0341444	3.35454	1	5.76749	15.0066	0.377299	2.74477	7.10753	0.612865	13.3963	15.2567	2.73015e-07	1.38617	6.79598	0.89437	GCGACCCAUACUUGGUUUCAG	experimental		mature miRNA	standard	MIMAT0003233	hsa-miR-551b-3p	hsa-miR-551b-3p
686	hsa-miR-551b-5p	0.0672296	7.65782	1	0.00878443	4.61486	1	0.00982666	5.4179	1	2.7892	3.17612	0.692142	13.7679	16.4311	0.0912913	7.94929	12.7409	0.43707	15.7485	16.7218	2.54364e-07	0.0166147	7.56879	1	GAAAUCAAGCGUGGGUGAGACC	experimental		mature miRNA	standard	MIMAT0004794	hsa-miR-551b-5p	hsa-miR-551b-5p
687	hsa-miR-552-3p	0.0628938	4.09867	1	0.00895503	4.58424	1	0.282393	3.44075	0.941862	4.641	2.57933	0.370409	2.50073	18.5091	0.73494	5.41645	8.92195	0.465084	13.6055	15.8229	2.16915e-06	0.0176936	5.65474	1	AACAGGUGACUGGUUAGACAA	experimental		mature miRNA	standard	MIMAT0003215	hsa-miR-552-3p	hsa-miR-552-3p
688	hsa-miR-552-5p	0.0562411	3.81392	1	1.00977	3.59757	0.798584	0.919917	9.63952	0.934774	3.23677	1.47804	0.184182	20.1971	19.127	0.0662592	3.37242	11.6378	0.694679	14.2548	22.2831	0.00246758	0.0131443	5.44224	1	GUUUAACCUUUUGCCUGUUGG	experimental		mature miRNA	standard	MIMAT0026615	hsa-miR-552-5p	hsa-miR-552-5p
689	hsa-miR-553	0.0733679	6.19246	1	0.396282	4.07156	0.918511	0.00905188	5.30319	1	0.037189	4.05946	1	8.12248	14.5888	0.169455	5.57133	6.62268	0.272177	9.4782	23.4888	0.00630216	0.013301	4.51557	1	AAAACGGUGAGAUUUUGUUUU	experimental		mature miRNA	standard	MIMAT0003216	hsa-miR-553	hsa-miR-553
690	hsa-miR-554	0.0561619	7.72021	1	0.00882074	4.85996	1	2.33204	4.83617	0.686441	7.60285	3.43631	0.179111	11.5613	20.9141	0.288958	5.45018	9.01264	0.446652	15.8576	24.2636	0.00130689	0.0170505	4.19724	1	GCUAGUCCUGACUCAGCCAGU	experimental		mature miRNA	standard	MIMAT0003217	hsa-miR-554	hsa-miR-554
691	hsa-miR-555	0.0670753	4.73469	1	0.00888673	6.03671	1	0.00988274	7.0681	1	2.65931	3.55724	0.740053	13.5972	11.3941	0.0162182	9.52057	11.1739	0.287442	12.662	12.5343	2.06382e-09	0.0166884	5.74993	1	AGGGUAAGCUGAACCUCUGAU	experimental		mature miRNA	standard	MIMAT0003219	hsa-miR-555	hsa-miR-555
692	hsa-miR-556-3p	0.0569363	3.56985	1	0.00876968	3.89199	1	9.98822	5.65938	0.153468	4.40395	3.90589	0.543206	2.90891	18.4371	0.706752	3.59306	10.6242	0.685654	10.8748	14.658	2.77926e-05	0.0176707	5.75352	1	AUAUUACCAUUAGCUCAUCUUU	experimental		mature miRNA	standard	MIMAT0004793	hsa-miR-556-3p	hsa-miR-556-3p
693	hsa-miR-556-5p	3.26316	4.63294	0.851641	1.19627	4.62007	0.785376	0.0101328	5.81563	1	0.0408357	2.82388	1	5.10156	13.6259	0.323055	0.0132013	8.01289	1	7.17076	14.442	7.7714e-05	0.0140774	5.74771	1	GAUGAGCUCAUUGUAAUAUGAG	experimental		mature miRNA	standard	MIMAT0003220	hsa-miR-556-5p	hsa-miR-556-5p
694	hsa-miR-557	13.9226	6.56372	0.0903414	2.1733	4.02773	0.761677	0.0131335	4.66186	1	11.8662	3.91923	0.068486	8.35829	15.2954	0.431842	6.1802	10.8315	0.486397	17.3753	20.9194	0.000710136	4.67911	6.52338	0.675006	GUUUGCACGGGUGGGCCUUGUCU	experimental		mature miRNA	standard	MIMAT0003221	hsa-miR-557	hsa-miR-557
695	hsa-miR-558	0.0834978	3.97612	1	0.00749968	4.37858	1	0.00925753	5.431	1	1.16037	2.21891	0.839142	28.4205	108.28	0.604313	0.0127609	5.90876	1	5.11563	11.9285	3.49637e-05	0.0144786	7.37113	1	UGAGCUGCUGUACCAAAAU	experimental		mature miRNA	standard	MIMAT0003222	hsa-miR-558	hsa-miR-558
696	hsa-miR-559	0.0546154	2.53299	1	0.010336	4.21407	1	5.11242	3.21391	0.17006	1.97309	2.47186	0.705339	1.86713	16.3536	0.779045	0.0117328	7.67603	1	3.98057	10.8995	0.0013741	4.30077	3.69186	0.43805	UAAAGUAAAUAUGCACCAAAA	experimental		mature miRNA	standard	MIMAT0003223	hsa-miR-559	hsa-miR-559
697	hsa-miR-561-3p	334.482	36.2143	9.54449e-20	10.7136	15.4513	0.591544	0.249885	5.65817	0.977667	5.52592	2.66749	0.31452	3.69592	17.2238	0.680673	0.0150561	7.54393	1	6.33646	8.53637	9.25426e-06	0.01821	10.9129	1	CAAAGUUUAAGAUCCUUGAAGU	experimental		mature miRNA	standard	MIMAT0003225	hsa-miR-561-3p	hsa-miR-561-3p
698	hsa-miR-561-5p	0.0625815	3.49666	1	3.78954	2.96569	0.228941	16.9099	38.9632	0.723879	2.11933	2.73751	0.645085	11.0505	15.1321	0.134984	0.0110222	8.94462	1	3.62398	17.6048	0.123915	0.0114823	6.84761	1	AUCAAGGAUCUUAAACUUUGCC	experimental		mature miRNA	standard	MIMAT0022706	hsa-miR-561-5p	hsa-miR-561-5p
699	hsa-miR-562	10.3801	5.17382	0.425128	0.00869329	2.84047	1	0.0110537	6.42525	1	0.0507863	2.98888	1	3.8256	13.7585	0.477497	1.32045	7.61442	0.880929	2.4545	6.61266	5.24885e-05	0.0211025	14.0723	1	AAAGUAGCUGUACCAUUUGC	experimental		mature miRNA	standard	MIMAT0003226	hsa-miR-562	hsa-miR-562
700	hsa-miR-563	12.8856	4.78883	0.343455	0.00785096	6.23016	1	0.0107488	3.94249	1	0.0525664	2.20626	1	1.41989	13.4586	0.736772	0.016133	7.45731	1	2.74027	10.4671	0.00160011	0.0202199	7.74983	1	AGGUUGACAUACGUUUCCC	experimental		mature miRNA	standard	MIMAT0003227	hsa-miR-563	hsa-miR-563
701	hsa-miR-564	17.9499	6.82271	0.0438416	1.04974	3.73879	0.824947	3.5668	7.45957	0.756325	5.22313	5.58364	0.600113	14.8063	22.2729	0.318331	10.8725	16.255	0.430904	15.481	12.6425	7.05307e-07	0.0189381	6.59086	1	AGGCACGGUGUCAGCAGGC	experimental		mature miRNA	standard	MIMAT0003228	hsa-miR-564	hsa-miR-564
702	hsa-miR-566	1.05167	4.50632	0.970188	0.00862343	4.49421	1	0.0108919	9.46925	1	0.323012	3.19754	0.983748	0.00130508	13.6995	1	0.0166335	8.03039	1	2.99204	7.63072	1.85026e-06	0.0222787	7.63828	1	GGGCGCCUGUGAUCCCAAC	experimental		mature miRNA	standard	MIMAT0003230	hsa-miR-566	hsa-miR-566
703	hsa-miR-567	0.0896059	3.32078	1	2.59802	12.3135	0.826462	0.00904449	7.56558	1	0.0378332	3.90251	1	3.39523	23.3869	0.654458	0.0118462	14.6596	1	2.92404	9.4042	0.000843067	0.0112955	7.03302	1	AGUAUGUUCUUCCAGGACAGAAC	experimental		mature miRNA	standard	MIMAT0003231	hsa-miR-567	hsa-miR-567
704	hsa-miR-568	0.170449	5.16555	0.99427	0.0112421	2.89499	1	0.00969607	9.18804	1	2.23022	2.34707	0.671639	19.5968	15.909	0.0350032	0.0117856	9.67265	1	5.46517	11.6949	5.24613e-05	16.4118	11.2376	0.29391	AUGUAUAAAUGUAUACACAC	experimental		mature miRNA	standard	MIMAT0003232	hsa-miR-568	hsa-miR-568
705	hsa-miR-569	0.0647388	5.04021	1	0.00869724	4.00215	1	6.38745	7.8602	0.45368	0.0383562	2.62725	1	2.30863	17.8831	0.710601	0.0123941	6.62606	1	1.01392	14.4708	0.332355	0.837145	5.11696	0.911876	AGUUAAUGAAUCCUGGAAAGU	experimental		mature miRNA	standard	MIMAT0003234	hsa-miR-569	hsa-miR-569
706	hsa-miR-570-3p	6.20802	4.89062	0.493323	1.92724	5.48105	0.821672	1.78476	8.84045	0.904239	20.1488	4.83159	0.0103532	3.44624	15.1699	0.684814	5.84981	9.22489	0.518351	0.274027	14.7683	0.858672	0.0188395	5.54888	1	CGAAAACAGCAAUUACCUUUGC	experimental		mature miRNA	standard	MIMAT0003235	hsa-miR-570-3p	hsa-miR-570-3p
707	hsa-miR-571	0.0560959	5.32063	1	0.019475	3.93489	1	9.90817	6.06153	0.315724	3.45248	2.86492	0.730101	0.00215659	15.5183	1	1.39738	10.2854	0.915196	0.000246079	10.8484	1	12.1856	3.5219	0.0934261	UGAGUUGGCCAUCUGAGUGAG	experimental		mature miRNA	standard	MIMAT0003236	hsa-miR-571	hsa-miR-571
708	hsa-miR-572	12.3008	10.085	0.174645	10.4613	4.95191	0.272841	39.0296	33.734	0.44118	10.3859	3.96919	0.0519883	16.6667	18.0279	0.291802	10.4564	12.4202	0.25267	8.47946	18.0532	0.061419	13.8313	7.01066	0.212108	GUCCGCUCGGCGGUGGCCCA	experimental		mature miRNA	standard	MIMAT0003237	hsa-miR-572	hsa-miR-572
709	hsa-miR-573	32.7758	42.8977	0.482064	0.0195321	4.19351	1	4.80484	5.59543	0.628103	0.0598192	2.88658	1	1.40954	18.8487	0.887485	15.4541	8.50947	0.120761	0.000271833	11.4957	1	30.7962	26.0931	0.582727	CUGAAGUGAUGUGUAACUGAUCAG	experimental		mature miRNA	standard	MIMAT0003238	hsa-miR-573	hsa-miR-573
710	hsa-miR-574-3p	83.0916	24.8636	5.43754e-06	252.697	53.4325	4.16187e-05	177.4	21.2975	7.92441e-12	231.5	22.5426	1.24335e-25	338.638	49.9474	2.07475e-10	152.497	28.8472	2.89478e-11	180.209	31.9797	6.58144e-14	496.917	47.1646	1.26059e-17	CACGCUCAUGCACACACCCACA	experimental		mature miRNA	standard	MIMAT0003239	hsa-miR-574-3p	hsa-miR-574-3p
711	hsa-miR-574-5p	258.607	28.2473	7.98496e-26	293.618	45.7119	2.13186e-08	153.245	14.6839	1.1837e-16	244.577	24.7626	1.1682e-23	295.717	64.4075	2.20952e-05	145.037	30.2412	1.83877e-09	109.419	21.624	1.48312e-13	186.81	50.7893	0.00839305	UGAGUGUGUGUGUGUGAGUGUGU	experimental		mature miRNA	standard	MIMAT0004795	hsa-miR-574-5p	hsa-miR-574-5p
712	hsa-miR-575	16.395	8.04169	0.0143942	1.17546	5.91238	0.921932	35.2725	8.54705	0.00583047	30.3289	10.8336	0.0225524	3.22308	14.8264	0.775574	26.1323	14.1964	0.01635	16.6248	30.0514	0.0610932	47.0594	30.7415	0.372861	GAGCCAGUUGGACAGGAGC	experimental		mature miRNA	standard	MIMAT0003240	hsa-miR-575	hsa-miR-575
713	hsa-miR-576-3p	0.0725121	5.198	1	0.0147786	3.96561	1	15.1114	5.32289	0.0926342	7.00337	3.22395	0.508185	0.00182692	16.0197	1	3.58494	8.01353	0.738372	0.000245675	16.5249	1	0.0240806	6.16175	1	AAGAUGUGGAAAAAUUGGAAUC	experimental		mature miRNA	standard	MIMAT0004796	hsa-miR-576-3p	hsa-miR-576-3p
714	hsa-miR-576-5p	10.4226	12.8206	0.360096	19.056	7.41784	0.210625	49.2277	20.4084	0.111692	53.3843	9.69595	5.53718e-07	8.57971	19.4481	0.614787	21.8007	10.4414	0.00558285	3.56071	13.1969	0.233275	13.4347	4.8923	0.0960654	AUUCUAAUUUCUCCACGUCUUU	experimental		mature miRNA	standard	MIMAT0003241	hsa-miR-576-5p	hsa-miR-576-5p
715	hsa-miR-577	0.060793	4.01977	1	0.0164606	3.204	1	33.2494	18.4694	0.21281	0.0615103	2.16983	1	0.00180469	16.2638	1	2.40969	7.53723	0.794755	0.000215556	16.6561	1	5.58428	6.86177	0.695732	UAGAUAAAAUAUUGGUACCUG	experimental		mature miRNA	standard	MIMAT0003242	hsa-miR-577	hsa-miR-577
716	hsa-miR-578	0.0659138	4.47996	1	0.0163722	4.69306	1	0.0116205	6.85656	1	0.0591593	2.48772	1	1.24098	15.08	0.827917	2.30471	9.73742	0.836875	0.000184271	10.6384	1	8.11683	5.7534	0.39124	CUUCUUGUGCUCUAGGAUUGU	experimental		mature miRNA	standard	MIMAT0003243	hsa-miR-578	hsa-miR-578
717	hsa-miR-579-3p	0.0661733	6.01222	1	0.0212833	3.20974	1	0.0143887	7.04893	1	13.485	7.53102	0.566046	0.00213295	14.0921	1	2.61349	7.14596	0.77657	0.000220553	10.7066	1	10.2911	6.92973	0.480573	UUCAUUUGGUAUAAACCGCGAUU	experimental		mature miRNA	standard	MIMAT0003244	hsa-miR-579-3p	hsa-miR-579-3p
718	hsa-miR-579-5p	23.9752	9.93641	0.00871034	0.0165011	4.31077	1	23.4188	31.7358	0.634817	6.54094	3.12522	0.293534	12.6817	20.9679	0.449444	2.86839	11.0943	0.795838	0.460337	14.4737	0.766134	53.0704	62.4076	0.649228	UCGCGGUUUGUGCCAGAUGACG	experimental		mature miRNA	standard	MIMAT0026616	hsa-miR-579-5p	hsa-miR-579-5p
719	hsa-miR-580-3p	146.608	20.4553	2.70666e-08	0.0127269	4.93628	1	98.4229	61.9352	0.293679	0.0785571	2.68934	1	0.0017612	17.6917	1	0.0248687	9.55296	1	0.000203563	11.4884	1	0.0315726	6.60487	1	UUGAGAAUGAUGAAUCAUUAGG	experimental		mature miRNA	standard	MIMAT0003245	hsa-miR-580-3p	hsa-miR-580-3p
720	hsa-miR-580-5p	1.17202	3.61942	0.960776	0.0126846	6.09585	1	0.0136118	7.74165	1	0.0858109	1.81967	1	0.0013809	13.8486	1	0.093715	7.63149	0.995157	0.000149849	13.4081	1	0.0241876	8.6096	1	UAAUGAUUCAUCAGACUCAGAU	experimental		mature miRNA	standard	MIMAT0026617	hsa-miR-580-5p	hsa-miR-580-5p
721	hsa-miR-581	0.058645	5.6115	1	3.4017	4.74803	0.757069	16.8294	15.6884	0.518647	10.9462	2.85052	0.101344	0.00220992	20.7427	1	0.0156699	9.58671	1	0.000277146	12.4809	1	7.89443	6.53919	0.440741	UCUUGUGUUCUCUAGAUCAGU	experimental		mature miRNA	standard	MIMAT0003246	hsa-miR-581	hsa-miR-581
722	hsa-miR-582-3p	0.090691	3.92346	1	0.0130628	3.35521	1	3.101	19.2447	0.920147	5.17228	2.23754	0.531957	0.00157822	18.7954	1	0.0199363	10.6092	1	0.000189694	10.2601	1	0.0219676	6.19139	1	UAACUGGUUGAACAACUGAACC	experimental		mature miRNA	standard	MIMAT0004797	hsa-miR-582-3p	hsa-miR-582-3p
723	hsa-miR-582-5p	0.0717979	5.38347	1	3.94191	3.58818	0.559231	12.2088	11.2095	0.531136	9.14129	6.50825	0.591394	0.00191514	15.0192	1	0.658174	10.7246	0.963453	0.000294857	12.7747	1	0.0180011	4.78588	1	UUACAGUUGUUCAACCAGUUACU	experimental		mature miRNA	standard	MIMAT0003247	hsa-miR-582-5p	hsa-miR-582-5p
724	hsa-miR-583	3.16691	5.81322	0.73563	0.024024	3.09927	1	333.922	48.2173	2.62203e-08	3.82439	2.93939	0.705797	0.002924	14.4751	1	5.14076	10.6388	0.703216	0.000323776	11.8743	1	171.439	145.947	0.493689	CAAAGAGGAAGGUCCCAUUAC	experimental		mature miRNA	standard	MIMAT0003248	hsa-miR-583	hsa-miR-583
725	hsa-miR-584-3p	206.665	21.5289	6.94612e-22	242.902	36.1404	9.39574e-08	31.703	28.1376	0.509937	0.0428071	2.81419	1	15.7428	35.1614	0.518488	0.0162893	6.91364	1	0.000341744	13.5477	1	2.10182	7.95582	0.856853	UCAGUUCCAGGCCAACCAGGCU	experimental		mature miRNA	standard	MIMAT0022708	hsa-miR-584-3p	hsa-miR-584-3p
726	hsa-miR-584-5p	0.109835	3.70748	1	2.83174	2.99404	0.47225	0.0113726	4.50635	1	0.0601663	2.09289	1	0.00126277	16.7807	1	0.0162224	10.1805	1	0.00999943	6.74456	0.962819	0.0153793	6.09653	1	UUAUGGUUUGCCUGGGACUGAG	experimental		mature miRNA	standard	MIMAT0003249	hsa-miR-584-5p	hsa-miR-584-5p
727	hsa-miR-585-3p	0.0556079	4.36742	1	85.5457	73.9128	0.409239	28.4979	41.9159	0.641118	0.0395002	3.01405	1	2.12328	9.58185	0.606067	128.263	33.5614	1.49191e-05	0.000360435	16.7299	1	0.0127653	5.02494	1	UGGGCGUAUCUGUAUGCUA	experimental		mature miRNA	standard	MIMAT0003250	hsa-miR-585-3p	hsa-miR-585-3p
728	hsa-miR-585-5p	0.0459942	6.15057	1	0.776943	3.31032	0.897066	10.6532	16.0826	0.651227	8.31166	3.72262	0.204306	2.78496	12.8851	0.684555	1.20303	9.80785	0.89492	0.0165995	12.3662	0.982099	2.377	6.90792	0.810147	CUAGCACACAGAUACGCCCAGA	experimental		mature miRNA	standard	MIMAT0026618	hsa-miR-585-5p	hsa-miR-585-5p
729	hsa-miR-586	0.0875981	5.56137	1	2.73495	3.63912	0.606083	46.386	31.5584	0.303792	0.0562795	2.57333	1	0.00143303	22.1114	1	0.0172901	7.28677	1	0.000211835	13.2434	1	0.0161982	5.70138	1	UAUGCAUUGUAUUUUUAGGUCC	experimental		mature miRNA	standard	MIMAT0003252	hsa-miR-586	hsa-miR-586
730	hsa-miR-587	0.0905257	2.67668	1	7.68527	3.52509	0.149071	11.6255	6.66728	0.245961	0.0565151	3.80936	1	0.00142876	14.6149	1	0.0170889	10.8326	1	0.000212532	10.7842	1	0.0153838	8.63706	1	UUUCCAUAGGUGAUGAGUCAC	experimental		mature miRNA	standard	MIMAT0003253	hsa-miR-587	hsa-miR-587
731	hsa-miR-588	0.0732642	4.81785	1	0.0140334	2.63893	1	5.69689	6.1411	0.544047	0.0681688	1.5226	1	0.00161364	13.9998	1	240.921	34.9855	7.23807e-12	0.000228245	12.49	1	0.024525	5.54125	1	UUGGCCACAAUGGGUUAGAAC	experimental		mature miRNA	standard	MIMAT0003255	hsa-miR-588	hsa-miR-588
732	hsa-miR-589-3p	1.59848	7.88602	0.950675	0.0141932	3.15959	1	4.07628	6.82944	0.691391	0.0579789	3.27781	1	0.768907	11.4681	0.854367	0.0180904	7.97204	1	0.000189554	14.3887	1	3.02473	8.33706	0.849088	UCAGAACAAAUGCCGGUUCCCAGA	experimental		mature miRNA	standard	MIMAT0003256	hsa-miR-589-3p	hsa-miR-589-3p
733	hsa-miR-589-5p	8.97599	7.56445	0.290818	20.058	7.32514	0.288143	11.667	4.8496	0.224126	9.12566	3.29178	0.162902	8.86519	13.8633	0.442168	8.56312	8.58833	0.316657	0.000453306	10.9921	1	12.859	4.82035	0.103048	UGAGAACCACGUCUGCUCUGAG	experimental		mature miRNA	standard	MIMAT0004799	hsa-miR-589-5p	hsa-miR-589-5p
734	hsa-miR-590-3p	0.0420221	4.43573	1	3.97698	4.31258	0.698781	29.6609	18.6958	0.326869	18.1595	5.94339	0.0615953	2.09481	13.4946	0.788621	16.8451	7.4773	0.00956172	0.000400117	11.8752	1	1.81602	7.54336	0.870563	UAAUUUUAUGUAUAAGCUAGU	experimental		mature miRNA	standard	MIMAT0004801	hsa-miR-590-3p	hsa-miR-590-3p
735	hsa-miR-590-5p	10.7944	8.20598	0.200345	6.0042	4.58972	0.601723	291.498	38.4797	6.74474e-09	19.8849	4.97409	0.0138882	55.9697	86.1385	0.520346	20.7872	12.7363	0.0937861	0.000509006	10.8855	1	2.41701	5.41335	0.80613	GAGCUUAUUCAUAAAAGUGCAG	experimental		mature miRNA	standard	MIMAT0003258	hsa-miR-590-5p	hsa-miR-590-5p
736	hsa-miR-591	0.0760711	6.90904	1	1.04171	4.25846	0.885135	0.0113542	3.68788	1	0.051326	2.41657	1	3.57638	15.7502	0.573144	0.0150114	7.0428	1	0.000181748	13.8713	1	2.03126	3.73366	0.659506	AGACCAUGGGUUCUCAUUGU	experimental		mature miRNA	standard	MIMAT0003259	hsa-miR-591	hsa-miR-591
737	hsa-miR-592	0.0528831	3.52668	1	0.0207777	3.98128	1	7.42932	4.79723	0.358046	8.35926	2.56951	0.270361	0.0023074	14.0935	1	6.84469	5.69642	0.290544	0.000269417	15.6176	1	11.6424	4.11569	0.185984	UUGUGUCAAUAUGCGAUGAUGU	experimental		mature miRNA	standard	MIMAT0003260	hsa-miR-592	hsa-miR-592
738	hsa-miR-593-3p	0.0510608	4.26251	1	0.0157894	3.6787	1	5.47887	5.38189	0.456318	0.0480962	1.81102	1	5.88536	20.9187	0.576806	5.46883	8.36876	0.513169	0.000229919	9.78482	1	8.45063	7.41666	0.479151	UGUCUCUGCUGGGGUUUCU	experimental		mature miRNA	standard	MIMAT0004802	hsa-miR-593-3p	hsa-miR-593-3p
739	hsa-miR-593-5p	3.24223	8.06137	0.773373	0.0198782	4.621	1	325.984	29.7297	8.53063e-19	9.76331	3.07235	0.138133	26.343	9.31944	0.00105446	7.07065	9.55658	0.50336	0.00036654	11.8413	1	12.2282	5.78902	0.317299	AGGCACCAGCCAGGCAUUGCUCAGC	experimental		mature miRNA	standard	MIMAT0003261	hsa-miR-593-5p	hsa-miR-593-5p
740	hsa-miR-595	27.7001	5.8687	9.25602e-09	24.6456	8.16183	0.279271	22.6131	8.17972	0.165603	49.4082	8.27294	9.2097e-06	21.7642	25.7918	0.427208	42.4248	10.2909	1.0455e-05	0.000554643	11.1108	1	30.8541	12.9424	0.157343	GAAGUGUGCCGUGGUGUGUCU	experimental		mature miRNA	standard	MIMAT0003263	hsa-miR-595	hsa-miR-595
741	hsa-miR-596	10.8215	4.13212	0.00850067	2.5451	3.52419	0.791828	24.072	7.65766	0.101377	14.2668	3.92679	0.0436835	41.7196	22.7723	0.0708646	18.5397	10.8931	0.0788791	0.000455113	10.9003	1	15.4691	8.10046	0.278059	AAGCCUGCCCGGCUCCUCGGG	experimental		mature miRNA	standard	MIMAT0003264	hsa-miR-596	hsa-miR-596
742	hsa-miR-597-3p	0.0441649	5.18983	1	0.0180435	3.62968	1	14.5711	8.21664	0.24959	6.071	3.72348	0.467075	13.2419	16.9818	0.247089	4.86118	5.51188	0.376035	0.00029292	12.186	1	6.62206	6.94133	0.569289	UGGUUCUCUUGUGGCUCAAGCGU	experimental		mature miRNA	standard	MIMAT0026619	hsa-miR-597-3p	hsa-miR-597-3p
743	hsa-miR-597-5p	3.76441	4.26616	0.601983	6.53978	4.9081	0.550095	7.78606	6.94462	0.555776	7.68181	3.68916	0.319179	23.8849	20.6386	0.156136	15.3459	6.10511	0.0114659	0.000412691	8.62003	1	0.269956	5.79037	0.978288	UGUGUCACUCGAUGACCACUGU	experimental		mature miRNA	standard	MIMAT0003265	hsa-miR-597-5p	hsa-miR-597-5p
744	hsa-miR-598-3p	25.7138	5.66244	2.09595e-07	48.8245	6.71472	0.00116473	26.5926	9.18665	0.147003	32.4871	5.73487	0.000105886	47.2616	22.5363	0.0490433	13.0684	10.7032	0.204927	0.000536549	6.206	1	9.27986	3.93606	0.157002	UACGUCAUCGUUGUCAUCGUCA	experimental		mature miRNA	standard	MIMAT0003266	hsa-miR-598-3p	hsa-miR-598-3p
745	hsa-miR-598-5p	11.334	7.7031	0.369201	0.0190654	3.41719	1	0.0155957	5.67675	1	2.15635	3.34034	0.863993	20.4624	19.0372	0.142338	11.125	9.25795	0.317447	0.000259772	8.53266	1	2.80059	8.6094	0.883729	GCGGUGAUCCCGAUGGUGUGAGC	experimental		mature miRNA	standard	MIMAT0026620	hsa-miR-598-5p	hsa-miR-598-5p
746	hsa-miR-599	0.055524	4.26077	1	0.0135706	2.97924	1	5.65228	8.97847	0.688729	14.212	3.71184	0.0484937	162.233	46.4332	4.82406e-05	9.18084	9.77449	0.362547	0.000288828	9.10077	1	0.0172133	3.68154	1	GUUGUGUCAGUUUAUCAAAC	experimental		mature miRNA	standard	MIMAT0003267	hsa-miR-599	hsa-miR-599
747	hsa-miR-600	0.0404419	7.15374	1	13.6609	3.54919	0.0125991	5.93095	4.88877	0.320663	2.29469	2.80292	0.58714	2.9216	17.0397	0.743513	3.55142	7.94873	0.479529	26.8317	15.9472	9.8193e-09	4.11973	5.9689	0.555348	ACUUACAGACAAGAGCCUUGCUC	experimental		mature miRNA	standard	MIMAT0003268	hsa-miR-600	hsa-miR-600
748	hsa-miR-601	1.54863	5.60857	0.844724	9.41535	2.89871	0.0791857	16.9662	6.84125	0.0853875	9.42271	4.37687	0.0980846	4.94054	17.4207	0.688405	10.5741	11.8712	0.183539	31.973	20.6033	8.70836e-06	22.8897	10.3316	0.119331	UGGUCUAGGAUUGUUGGAGGAG	experimental		mature miRNA	standard	MIMAT0003269	hsa-miR-601	hsa-miR-601
749	hsa-miR-602	0.0432705	5.07982	1	17.7665	4.85004	0.0336968	14.6378	7.88157	0.174395	11.5363	3.38844	0.020896	0.00235606	14.2375	1	11.2523	11.4477	0.146947	34.411	27.3455	0.000151314	3.84689	5.25013	0.627198	GACACGGGCGACAGCUGCGGCCC	experimental		mature miRNA	standard	MIMAT0003270	hsa-miR-602	hsa-miR-602
750	hsa-miR-603	0.034055	6.69531	1	26.0649	8.34735	0.0545739	38.4016	10.5529	0.00406819	18.3765	6.20392	0.00479263	5.58568	19.2961	0.656587	6.03632	6.40448	0.111497	28.602	23.6693	0.000320511	7.14024	6.64959	0.352923	CACACACUGCAAUUACUUUUGC	experimental		mature miRNA	standard	MIMAT0003271	hsa-miR-603	hsa-miR-603
751	hsa-miR-604	0.0441614	8.44538	1	12.3339	2.98611	0.0191082	16.0879	7.20678	0.102867	8.06851	4.04031	0.216255	0.00231599	20.8332	1	4.95738	8.23561	0.399618	16.6363	17.4837	0.000153509	5.99541	12.8239	0.75505	AGGCUGCGGAAUUCAGGAC	experimental		mature miRNA	standard	MIMAT0003272	hsa-miR-604	hsa-miR-604
752	hsa-miR-605-3p	0.0601878	5.98345	1	3.13689	3.51425	0.453936	0.923133	8.1619	0.923893	0.856111	2.67921	0.886316	0.467877	16.9353	0.933243	10.1603	7.66517	0.068747	13.4513	17.7603	0.00023394	0.0140907	4.94309	1	AGAAGGCACUAUGAGAUUUAGA	experimental		mature miRNA	standard	MIMAT0026621	hsa-miR-605-3p	hsa-miR-605-3p
753	hsa-miR-605-5p	0.0435809	7.46177	1	16.4392	6.16646	0.0561808	3.82435	6.26355	0.610927	1.75535	3.54004	0.744881	14.2717	12.7888	0.0696981	5.66422	7.76104	0.242758	23.4158	22.7239	0.000223478	0.462041	6.67051	0.95127	UAAAUCCCAUGGUGCCUUCUCCU	experimental		mature miRNA	standard	MIMAT0003273	hsa-miR-605-5p	hsa-miR-605-5p
754	hsa-miR-606	0.0483324	5.86417	1	2.43558	2.45498	0.460033	4.90382	10.1217	0.676567	2.61976	1.98243	0.394876	6.21318	17.5197	0.495006	0.00982262	9.47976	1	13.8605	18.5859	0.000170881	5.27314	4.61049	0.305086	AAACUACUGAAAAUCAAAGAU	experimental		mature miRNA	standard	MIMAT0003274	hsa-miR-606	hsa-miR-606
755	hsa-miR-607	1.91778	11.0465	0.965998	8.4159	3.85138	0.0634787	0.0113382	3.50742	1	1.29829	3.01309	0.868679	0.303216	16.9454	0.951824	0.0131074	8.23675	1	9.94185	19.7075	0.00143593	0.0143193	5.81847	1	GUUCAAAUCCAGAUCUAUAAC	experimental		mature miRNA	standard	MIMAT0003275	hsa-miR-607	hsa-miR-607
756	hsa-miR-608	0.0403841	3.27052	1	6.95645	4.50283	0.313905	2.2675	4.47666	0.665904	0.798595	4.38483	0.917055	31.8775	63.2047	0.480579	12.6736	14.1501	0.146427	8.52493	13.8735	0.00216827	2.80443	5.45975	0.65325	AGGGGUGGUGUUGGGACAGCUCCGU	experimental		mature miRNA	standard	MIMAT0003276	hsa-miR-608	hsa-miR-608
757	hsa-miR-609	5.7377	5.01223	0.441034	0.0120551	3.41014	1	1.26283	8.4055	0.903252	0.0394823	2.20608	1	9.11005	12.2248	0.20141	13.7102	9.27196	0.0696725	6.8396	12.0787	0.000171933	17.4339	12.907	0.46681	AGGGUGUUUCUCUCAUCUCU	experimental		mature miRNA	standard	MIMAT0003277	hsa-miR-609	hsa-miR-609
758	hsa-miR-610	6.21026	5.24849	0.513024	7.02552	3.73457	0.250123	0.012792	7.70461	1	4.74992	3.49241	0.492271	5.05078	16.3321	0.594141	3.42212	10.2331	0.697782	6.55571	13.5549	0.00623372	0.530536	8.84033	0.969864	UGAGCUAAAUGUGUGCUGGGA	experimental		mature miRNA	standard	MIMAT0003278	hsa-miR-610	hsa-miR-610
759	hsa-miR-611	2.99428	5.66869	0.842519	4.89973	3.33892	0.262395	0.0119771	7.6901	1	1.74649	2.5618	0.765548	9.64758	14.4827	0.220133	5.14623	12.8873	0.638277	8.30906	13.7757	0.000675511	0.015375	7.10963	1	GCGAGGACCCCUCGGGGUCUGAC	experimental		mature miRNA	standard	MIMAT0003279	hsa-miR-611	hsa-miR-611
760	hsa-miR-612	10.0232	8.40099	0.140375	7.80873	4.34913	0.390942	26.6402	10.1838	0.0802763	27.4682	10.0989	0.0158014	9.57206	21.817	0.624303	108.191	30.7567	7.93905e-06	36.283	20.3237	8.58846e-06	47.6619	25.6404	0.230073	GCUGGGCAGGGCUUCUGAGCUCCUU	experimental		mature miRNA	standard	MIMAT0003280	hsa-miR-612	hsa-miR-612
761	hsa-miR-613	0.0925348	4.01007	1	0.103704	4.77186	0.98297	0.010109	6.18554	1	0.0547368	2.55382	1	0.00129285	15.1513	1	2.67034	12.7377	0.835826	2.37669	11.9715	0.0237161	0.018764	5.49822	1	AGGAAUGUUCCUUCUUUGCC	experimental		mature miRNA	standard	MIMAT0003281	hsa-miR-613	hsa-miR-613
762	hsa-miR-614	0.107863	5.09895	1	0.00821093	4.18306	1	0.00972599	6.12495	1	0.0596967	4.11309	1	0.0011529	19.1997	1	0.0529999	7.29319	0.995947	1.64039	14.4595	0.0874421	0.0197875	3.26114	1	GAACGCCUGUUCUUGCCAGGUGG	experimental		mature miRNA	standard	MIMAT0003282	hsa-miR-614	hsa-miR-614
763	hsa-miR-615-3p	2.60367	6.68026	0.801939	3.91845	5.18077	0.669055	14.46	10.4471	0.35575	2.59238	2.91374	0.644168	0.476525	20.9116	0.962316	16.832	12.9275	0.0838637	8.40404	16.9183	0.0221783	4.61508	6.13418	0.660202	UCCGAGCCUGGGUCUCCCUCUU	experimental		mature miRNA	standard	MIMAT0003283	hsa-miR-615-3p	hsa-miR-615-3p
764	hsa-miR-615-5p	7.79058	4.94787	0.214239	14.7923	5.36165	0.145741	14.8629	5.7179	0.101412	1.99905	3.96455	0.828126	0.00272748	21.1126	1	33.2552	17.8977	0.0196256	21.4247	17.6259	3.27376e-05	10.1674	7.18496	0.466978	GGGGGUCCCCGGUGCUCGGAUC	experimental		mature miRNA	standard	MIMAT0004804	hsa-miR-615-5p	hsa-miR-615-5p
765	hsa-miR-616-3p	0.0748025	5.17066	1	1.34234	4.38192	0.786287	3.47693	5.1069	0.576673	0.0440922	4.79411	1	0.0014268	17.3368	1	2.92266	12.2371	0.792762	2.63415	13.1386	0.0701091	0.0168146	5.88963	1	AGUCAUUGGAGGGUUUGAGCAG	experimental		mature miRNA	standard	MIMAT0004805	hsa-miR-616-3p	hsa-miR-616-3p
766	hsa-miR-616-5p	2.87938	4.3126	0.743178	7.88491	5.98469	0.497446	0.763518	3.88206	0.898974	8.30813	4.08504	0.331502	0.00248911	19.5972	1	3.07467	9.8599	0.737178	3.82086	17.0938	0.168428	4.25943	4.59173	0.627568	ACUCAAAACCCUUCAGUGACUU	experimental		mature miRNA	standard	MIMAT0003284	hsa-miR-616-5p	hsa-miR-616-5p
767	hsa-miR-617	0.0368353	6.89864	1	340.967	39.048	1.92158e-13	3.70043	4.82063	0.566157	3.88749	3.043	0.361068	3.39436	17.5852	0.747912	6.69739	9.24718	0.239717	2.2766	13.5266	0.33137	13.8936	9.48254	0.18164	AGACUUCCCAUUUGAAGGUGGC	experimental		mature miRNA	standard	MIMAT0003286	hsa-miR-617	hsa-miR-617
768	hsa-miR-618	0.0611787	6.38741	1	0.0117461	4.91441	1	0.00949324	5.0646	1	0.0448855	3.00924	1	2.40865	17.0053	0.715326	4.01882	7.6603	0.541279	0.45859	14.4077	0.624765	5.06743	4.1111	0.430503	AAACUCUACUUGUCCUUCUGAGU	experimental		mature miRNA	standard	MIMAT0003287	hsa-miR-618	hsa-miR-618
769	hsa-miR-619-3p	0.156017	6.17921	0.995211	0.0105124	2.50964	1	2.60911	4.31576	0.597847	0.039874	3.47427	1	1.34792	18.6502	0.847929	6.83728	10.641	0.433867	2.00051	10.0248	0.0470508	1.61595	5.269	0.860973	GACCUGGACAUGUUUGUGCCCAGU	experimental		mature miRNA	standard	MIMAT0003288	hsa-miR-619-3p	hsa-miR-619-3p
770	hsa-miR-619-5p	12.3139	8.03326	0.147949	6.8486	5.42467	0.449452	20.5919	7.10335	0.0716399	21.883	5.28598	0.00094854	21.1037	20.7064	0.221264	27.3067	14.9019	0.0170034	9.72672	13.3035	0.00446192	0.274933	7.03109	0.982118	GCUGGGAUUACAGGCAUGAGCC	experimental		mature miRNA	standard	MIMAT0026622	hsa-miR-619-5p	hsa-miR-619-5p
771	hsa-miR-620	0.0705138	4.46202	1	0.0106539	5.17359	1	0.0112234	4.81362	1	7.58414	3.17897	0.287964	3.73408	15.9994	0.583955	5.85982	10.1287	0.538938	0.349584	12.8194	0.703881	0.0178868	5.29176	1	AUGGAGAUAGAUAUAGAAAU	experimental		mature miRNA	standard	MIMAT0003289	hsa-miR-620	hsa-miR-620
772	hsa-miR-621	10.2867	5.831	0.505331	0.670653	2.17529	0.817725	0.0134744	7.22038	1	1.67068	2.83004	0.872365	0.001783	18.1238	1	1.13622	6.68047	0.890667	2.62759	11.7502	0.0462462	0.0229616	4.07573	1	GGCUAGCAACAGCGCUUACCU	experimental		mature miRNA	standard	MIMAT0003290	hsa-miR-621	hsa-miR-621
773	hsa-miR-622	0.0467205	5.22367	1	0.0139186	4.63278	1	0.0103724	7.20106	1	8.22121	4.3543	0.293688	10.8575	12.8946	0.166746	12.3706	10.9843	0.124542	4.26936	20.552	0.116839	16.2915	12.1	0.376931	ACAGUCUGCUGAGGUUGGAGC	experimental		mature miRNA	standard	MIMAT0003291	hsa-miR-622	hsa-miR-622
774	hsa-miR-623	3.24426	10.9946	0.831482	4.90188	3.06199	0.399371	0.566964	7.38473	0.956842	6.77382	3.78508	0.252655	16.6457	18.2755	0.252224	15.524	10.0387	0.0321875	7.79599	10.146	0.000342532	12.7137	6.84794	0.214735	AUCCCUUGCAGGGGCUGUUGGGU	experimental		mature miRNA	standard	MIMAT0003292	hsa-miR-623	hsa-miR-623
775	hsa-miR-624-3p	2.06586	6.23028	0.896791	5.59731	4.32997	0.422638	0.0119439	6.63077	1	7.59828	4.00407	0.281017	9.80149	15.5911	0.296364	0.0121193	9.49704	1	2.43501	13.626	0.138016	3.36823	6.24592	0.682274	CACAAGGUAUUGGUAUUACCU	experimental		mature miRNA	standard	MIMAT0004807	hsa-miR-624-3p	hsa-miR-624-3p
776	hsa-miR-624-5p	13.5404	4.06633	0.0406112	12.0719	5.63811	0.161795	0.014036	7.98394	1	18.0769	5.01606	0.023202	10.1732	23.0394	0.490282	12.7272	15.3329	0.334905	4.47929	18.1556	0.158816	0.016999	6.23606	1	UAGUACCAGUACCUUGUGUUCA	experimental		mature miRNA	standard	MIMAT0003293	hsa-miR-624-5p	hsa-miR-624-5p
777	hsa-miR-625-3p	11.5064	5.09744	0.0122891	12.4414	4.7879	0.189053	11.3537	7.11052	0.326979	27.6959	5.68911	2.92406e-05	16.3856	15.8336	0.249765	9.09238	11.8417	0.293736	12.0969	18.8004	0.0196714	17.9978	8.41002	0.16413	GACUAUAGAACUUUCCCCCUCA	experimental		mature miRNA	standard	MIMAT0004808	hsa-miR-625-3p	hsa-miR-625-3p
778	hsa-miR-625-5p	67.6083	15.4224	2.70649e-09	345.341	56.0063	6.67148e-08	56.8534	13.4172	0.00331536	160.425	23.9058	7.96115e-12	75.1133	26.1306	0.00909831	73.5812	28.3767	0.000442175	153.171	15.2934	2.23042e-45	89.811	22.9223	0.0078528	AGGGGGAAAGUUCUAUAGUCC	experimental		mature miRNA	standard	MIMAT0003294	hsa-miR-625-5p	hsa-miR-625-5p
779	hsa-miR-626	0.0555164	5.43914	1	0.334245	3.63058	0.936934	4.53226	11.3734	0.711962	0.0329981	2.53415	1	6.11999	20.5098	0.499464	0.0109057	9.7492	1	1.06878	11.6873	0.273873	6.46964	14.8039	0.709584	AGCUGUCUGAAAAUGUCUU	experimental		mature miRNA	standard	MIMAT0003295	hsa-miR-626	hsa-miR-626
780	hsa-miR-627-3p	2.53747	6.02453	0.911195	0.0108786	4.7901	1	1.69004	8.97532	0.904125	17.3603	2.6531	0.00677056	0.00175423	14.958	1	0.0180531	13.8108	1	0.294135	11.6074	0.703504	0.0254075	8.21969	1	UCUUUUCUUUGAGACUCACU	experimental		mature miRNA	standard	MIMAT0026623	hsa-miR-627-3p	hsa-miR-627-3p
781	hsa-miR-627-5p	37.2894	16.5881	0.00470941	17.6413	5.41781	0.127726	8.50843	7.5135	0.521271	23.857	4.68768	6.70085e-05	9.99303	16.5854	0.502339	16.5604	12.667	0.091095	2.50667	17.447	0.47363	31.6727	7.9174	0.0122228	GUGAGUCUCUAAGAAAAGAGGA	experimental		mature miRNA	standard	MIMAT0003296	hsa-miR-627-5p	hsa-miR-627-5p
782	hsa-miR-628-3p	7.97417	6.15004	0.570344	0.0110822	4.86199	1	0.0130603	5.86016	1	4.39571	3.39892	0.642096	3.30791	14.2716	0.62101	6.42342	10.9415	0.586672	0.812048	15.5555	0.556464	0.023035	6.89933	1	UCUAGUAAGAGUGGCAGUCGA	experimental		mature miRNA	standard	MIMAT0003297	hsa-miR-628-3p	hsa-miR-628-3p
783	hsa-miR-628-5p	8.64187	5.80489	0.420881	7.99965	4.92187	0.293425	0.457373	5.2565	0.956253	9.59327	2.78847	0.0634265	5.07496	18.45	0.627115	1.8138	7.41478	0.813318	0.334026	15.7419	0.83804	0.0170294	6.79405	0.998912	AUGCUGACAUAUUUACUAGAGG	experimental		mature miRNA	standard	MIMAT0004809	hsa-miR-628-5p	hsa-miR-628-5p
784	hsa-miR-629-3p	12.6688	7.86267	0.158006	19.8096	5.09885	0.0450172	0.0135269	5.46399	1	12.0862	5.42453	0.153422	7.41417	15.168	0.508783	16.8664	18.8965	0.232483	13.613	12.0315	5.36481e-06	12.998	8.12791	0.296765	GUUCUCCCAACGUAAGCCCAGC	experimental		mature miRNA	standard	MIMAT0003298	hsa-miR-629-3p	hsa-miR-629-3p
785	hsa-miR-629-5p	24.4879	9.12726	0.0177019	30.1293	10.8224	0.13759	5.47876	9.27477	0.742257	20.4443	5.81028	0.0360662	0.00286348	15.6022	1	1.18767	10.0554	0.908336	4.42431	18.3036	0.202869	5.23711	5.7618	0.650525	UGGGUUUACGUUGGGAGAACU	experimental		mature miRNA	standard	MIMAT0004810	hsa-miR-629-5p	hsa-miR-629-5p
786	hsa-miR-630	0.0863431	9.68862	1	0.571518	4.88367	0.903446	0.185811	5.51573	0.97443	0.0412192	4.64858	1	1.10546	14.5002	0.789251	0.0130844	9.4403	1	0.323305	23.1959	0.815219	0.0129358	6.95016	1	AGUAUUCUGUACCAGGGAAGGU	experimental		mature miRNA	standard	MIMAT0003299	hsa-miR-630	hsa-miR-630
787	hsa-miR-631	0.0553417	4.77119	1	3.4354	4.73552	0.680285	0.0112763	5.15706	1	3.53326	4.67144	0.722558	0.89807	16.5947	0.897257	2.70025	11.3438	0.769952	0.490713	15.7549	0.733554	2.22694	6.02759	0.781029	AGACCUGGCCCAGACCUCAGC	experimental		mature miRNA	standard	MIMAT0003300	hsa-miR-631	hsa-miR-631
788	hsa-miR-632	0.0872876	6.702	1	0.63043	3.97823	0.918148	5.90055	4.63424	0.430886	1.91576	3.59591	0.888571	0.0016009	17.0292	1	0.0182119	8.51448	1	0.000218164	15.785	1	0.0180642	5.77289	1	GUGUCUGCUUCCUGUGGGA	experimental		mature miRNA	standard	MIMAT0003302	hsa-miR-632	hsa-miR-632
789	hsa-miR-633	0.0580135	6.67755	1	0.0196679	5.27386	1	2.25739	3.88461	0.720144	3.60055	3.84628	0.796683	0.00214019	12.5989	1	6.2761	7.14782	0.452343	0.000247792	13.5149	1	6.23674	5.00189	0.567745	CUAAUAGUAUCUACCACAAUAAA	experimental		mature miRNA	standard	MIMAT0003303	hsa-miR-633	hsa-miR-633
790	hsa-miR-634	0.0444903	7.12129	1	0.0138556	4.08048	1	4.20842	5.45317	0.544291	2.6026	3.66839	0.745984	0.97379	15.8671	0.88936	3.75852	7.26821	0.530065	0.688172	13.9756	0.599375	15.457	6.80628	0.163484	AACCAGCACCCCAACUUUGGAC	experimental		mature miRNA	standard	MIMAT0003304	hsa-miR-634	hsa-miR-634
791	hsa-miR-635	0.0975309	8.13364	1	0.243993	2.61924	0.952012	0.0129756	4.67629	1	0.0734938	4.2724	1	0.0014346	12.4042	1	4.59461	4.07869	0.385612	0.000186641	18.2628	1	0.0197859	3.82501	1	ACUUGGGCACUGAAACAAUGUCC	experimental		mature miRNA	standard	MIMAT0003305	hsa-miR-635	hsa-miR-635
792	hsa-miR-636	1.89977	4.86118	0.884806	9.07445	3.86406	0.293223	14.4336	4.21829	0.0435975	0.056959	3.03602	1	0.00212735	17.873	1	0.346319	8.13762	0.975472	0.000275017	15.4379	1	8.49042	6.53783	0.464319	UGUGCUUGCUCGUCCCGCCCGCA	experimental		mature miRNA	standard	MIMAT0003306	hsa-miR-636	hsa-miR-636
793	hsa-miR-637	0.0375823	5.39058	1	20.7442	6.08042	0.0663102	7.83537	6.18316	0.363797	6.15152	4.11627	0.306006	4.02783	17.9327	0.712822	21.3182	16.8536	0.0591393	0.525944	14.8025	0.782225	5.9051	6.77669	0.476261	ACUGGGGGCUUUCGGGCUCUGCGU	experimental		mature miRNA	standard	MIMAT0003307	hsa-miR-637	hsa-miR-637
794	hsa-miR-638	1176.37	66.2547	4.96148e-75	828.437	43.2137	3.19893e-80	1726.31	65.0118	2.6666e-147	959.822	70.0062	2.62664e-43	930.806	104.647	2.56529e-19	1443.95	69.5211	5.63217e-102	1788.5	65.3749	4.80247e-172	1135.37	70.8162	1.13342e-44	AGGGAUCGCGGGCGGGUGGCGGCCU	experimental		mature miRNA	standard	MIMAT0003308	hsa-miR-638	hsa-miR-638
795	hsa-miR-639	2.4473	5.10268	0.784282	1.006	4.29971	0.89308	5.963	4.69416	0.393183	1.21552	2.10264	0.809564	1.11617	17.5853	0.900033	3.01919	10.6889	0.748685	0.858372	21.5757	0.734074	8.37533	8.67256	0.566477	AUCGCUGCGGUUGCGAGCGCUGU	experimental		mature miRNA	standard	MIMAT0003309	hsa-miR-639	hsa-miR-639
796	hsa-miR-640	0.0473585	6.20152	1	2.65146	3.56594	0.732047	11.6082	5.96482	0.204244	5.94952	3.60039	0.457636	0.00235957	16.0212	1	4.96883	7.78579	0.471132	0.0434932	14.5008	0.966467	10.8177	5.55868	0.236503	AUGAUCCAGGAACCUGCCUCU	experimental		mature miRNA	standard	MIMAT0003310	hsa-miR-640	hsa-miR-640
797	hsa-miR-641	0.0467587	4.65802	1	16.9712	5.55813	0.0600859	3.99703	7.57922	0.684206	8.19494	3.59533	0.0967022	11.4704	7.16764	0.00978411	0.0103871	12.4808	1	0.492856	14.1063	0.7282	6.21574	5.65442	0.293338	AAAGACAUAGGAUAGAGUCACCUC	experimental		mature miRNA	standard	MIMAT0003311	hsa-miR-641	hsa-miR-641
798	hsa-miR-642a-3p	13.2969	8.75537	0.144068	39.0064	9.22838	0.0162413	12.1233	4.69278	0.134946	10.0312	4.72316	0.160321	11.6604	22.0217	0.508694	13.3279	7.30629	0.0240982	0.607612	15.615	0.793662	1.41337	4.96012	0.85999	AGACACAUUUGGAGAGGGAACC	experimental		mature miRNA	standard	MIMAT0020924	hsa-miR-642a-3p	hsa-miR-642a-3p
799	hsa-miR-642a-5p	11.7309	10.8597	0.242915	38.2646	6.32917	0.000804079	21.9622	5.92361	0.0230307	7.41923	3.74101	0.168881	27.3797	19.2387	0.125611	9.12237	9.84452	0.218434	1.57272	18.6365	0.637751	11.3467	7.18508	0.289839	GUCCCUCUCCAAAUGUGUCUUG	experimental		mature miRNA	standard	MIMAT0003312	hsa-miR-642a-5p	hsa-miR-642a-5p
800	hsa-miR-642b-3p	9.29285	7.73556	0.220802	36.2562	8.02353	0.0201972	4.55446	7.1902	0.708732	13.1804	5.6734	0.0971259	19.5811	17.4936	0.220564	13.1745	9.04269	0.0561775	0.741627	15.4215	0.756441	19.5407	9.53179	0.165308	AGACACAUUUGGAGAGGGACCC	experimental		mature miRNA	standard	MIMAT0018444	hsa-miR-642b-3p	hsa-miR-642b-3p
801	hsa-miR-642b-5p	2.08328	5.90293	0.819756	66.9356	11.8879	0.00697726	2.90569	7.54581	0.838404	12.5488	4.37265	0.0997834	17.1505	17.0899	0.258377	10.838	9.75758	0.220989	0.000460864	16.7859	1	14.3694	9.79276	0.305346	GGUUCCCUCUCCAAAUGUGUCU	experimental		mature miRNA	standard	MIMAT0022736	hsa-miR-642b-5p	hsa-miR-642b-5p
802	hsa-miR-643	0.0488276	7.94379	1	7.9577	3.19444	0.289808	0.14414	5.01621	0.983659	1.13421	3.04094	0.894399	5.94003	20.2697	0.619829	9.06241	8.64283	0.230027	0.000314544	14.6839	1	6.90227	4.98318	0.277664	ACUUGUAUGCUAGCUCAGGUAG	experimental		mature miRNA	standard	MIMAT0003313	hsa-miR-643	hsa-miR-643
803	hsa-miR-644a	304.386	61.2101	6.12358e-07	11.3951	9.51695	0.632051	4.13994	5.74687	0.743247	6.88067	3.09129	0.50101	0.00281572	12.9357	1	0.0208623	11.0769	1	0.000323595	22.5844	1	5.63934	8.31095	0.768813	AGUGUGGCUUUCUUAGAGC	experimental		mature miRNA	standard	MIMAT0003314	hsa-miR-644a	hsa-miR-644a
804	hsa-miR-645	0.0979323	4.86461	1	7.66696	3.43435	0.226917	0.0146969	4.57554	1	14.6682	3.78504	0.159435	0.00168265	23.0977	1	0.0181138	11.0119	1	0.000222023	13.0203	1	0.0162667	9.38829	1	UCUAGGCUGGUACUGCUGA	experimental		mature miRNA	standard	MIMAT0003315	hsa-miR-645	hsa-miR-645
805	hsa-miR-646	0.0966829	8.44392	1	4.48926	3.5857	0.378674	0.0116905	8.60084	1	0.0525517	3.46738	1	2.25597	18.1423	0.707482	0.0159705	12.7314	1	0.000183376	26.0831	1	0.0122555	9.04237	1	AAGCAGCUGCCUCUGAGGC	experimental		mature miRNA	standard	MIMAT0003316	hsa-miR-646	hsa-miR-646
806	hsa-miR-647	0.0690566	5.55949	1	10.0919	2.01417	0.0409242	0.0144022	6.17321	1	5.96712	2.93773	0.514769	0.00209594	18.0778	1	0.305715	10.9282	0.983089	0.0002549	22.3902	1	4.38907	5.8091	0.628533	GUGGCUGCACUCACUUCCUUC	experimental		mature miRNA	standard	MIMAT0003317	hsa-miR-647	hsa-miR-647
807	hsa-miR-648	0.09732	8.10035	1	12.6259	4.38837	0.11755	0.0147531	4.83327	1	15.1537	5.33453	0.290792	0.00169601	19.2144	1	0.0179184	13.8478	1	0.000227094	10.5641	1	0.015891	4.67103	1	AAGUGUGCAGGGCACUGGU	experimental		mature miRNA	standard	MIMAT0003318	hsa-miR-648	hsa-miR-648
808	hsa-miR-649	0.119696	8.02258	1	0.0117319	4.53986	1	0.012282	7.49223	1	0.0812547	3.81779	1	0.00123027	12.5275	1	0.0207647	11.8427	1	0.000134303	10.8544	1	0.0207979	5.35425	1	AAACCUGUGUUGUUCAAGAGUC	experimental		mature miRNA	standard	MIMAT0003319	hsa-miR-649	hsa-miR-649
809	hsa-miR-650	11.3387	7.57032	0.392578	250.126	15.9275	4.66388e-41	0.0143822	5.02101	1	13.9792	5.47577	0.123748	5.70527	14.4898	0.509664	8.18752	15.0332	0.524344	2.24759	13.5185	0.303609	0.0147631	6.6948	1	AGGAGGCAGCGCUCUCAGGAC	experimental		mature miRNA	standard	MIMAT0003320	hsa-miR-650	hsa-miR-650
810	hsa-miR-651-3p	0.0764287	7.07978	1	4.17911	4.12695	0.345044	0.00988575	3.3666	1	4.184	3.71081	0.515793	14.3314	19.8443	0.136427	0.0110924	9.3752	1	12.5265	26.1307	0.00511508	0.0111135	5.1176	1	AAAGGAAAGUGUAUCCUAAAAG	experimental		mature miRNA	standard	MIMAT0026624	hsa-miR-651-3p	hsa-miR-651-3p
811	hsa-miR-651-5p	1.36207	5.57348	0.881715	42.489	53.6817	0.596079	37.0847	31.1324	0.407794	115.583	12.7506	2.66855e-19	5.04626	13.8576	0.602405	0.827306	10.68	0.920042	34.0147	15.2121	1.52347e-09	1.72372	5.04691	0.804926	UUUAGGAUAAGCUUGACUUUUG	experimental		mature miRNA	standard	MIMAT0003321	hsa-miR-651-5p	hsa-miR-651-5p
812	hsa-miR-652-3p	76.5961	16.058	1.76567e-09	132.203	33.8309	0.00382522	32.5013	10.019	0.0381205	30.3486	7.38103	0.000197755	47.9411	16.8313	0.00507408	11.249	11.0069	0.140396	51.8115	19.1959	1.42275e-08	14.1465	5.73222	0.113314	AAUGGCGCCACUAGGGUUGUG	experimental		mature miRNA	standard	MIMAT0003322	hsa-miR-652-3p	hsa-miR-652-3p
813	hsa-miR-652-5p	9.21413	10.0739	0.292972	10.3804	3.80733	0.138136	25.2171	44.1209	0.709704	23.2652	9.96235	0.0347304	248.491	57.7939	2.31649e-05	16.9462	11.5517	0.0324959	33.8595	26.8271	0.00129808	10.0036	5.29985	0.205215	CAACCCUAGGAGAGGGUGCCAUUCA	experimental		mature miRNA	standard	MIMAT0022709	hsa-miR-652-5p	hsa-miR-652-5p
814	hsa-miR-653-3p	0.0589819	3.56612	1	4.85775	3.52918	0.327817	0.00959587	6.4051	1	1.75876	1.57685	0.558837	7.01725	21.7712	0.514334	0.010155	7.77813	1	10.5512	11.9721	6.51959e-08	4.8196	5.51385	0.409359	UUCACUGGAGUUUGUUUCAAUA	experimental		mature miRNA	standard	MIMAT0026625	hsa-miR-653-3p	hsa-miR-653-3p
815	hsa-miR-653-5p	0.0685603	6.95398	1	2.78108	5.50589	0.627545	4.22574	20.3459	0.86249	2.17191	2.75009	0.67054	0.866452	15.4424	0.865132	0.0113209	5.8894	1	10.509	11.7806	1.88888e-07	0.0124816	7.67754	1	GUGUUGAAACAAUCUCUACUG	experimental		mature miRNA	standard	MIMAT0003328	hsa-miR-653-5p	hsa-miR-653-5p
816	hsa-miR-654-3p	2.427	5.76405	0.80485	2.45289	2.96404	0.584093	0.994921	6.77658	0.910492	19.1493	6.0417	0.00849473	280.15	48.4434	1.33811e-09	0.0105624	10.9816	1	19.3464	13.3632	8.81379e-09	11.0125	16.5521	0.599618	UAUGUCUGCUGACCAUCACCUU	experimental		mature miRNA	standard	MIMAT0004814	hsa-miR-654-3p	hsa-miR-654-3p
817	hsa-miR-654-5p	6.39799	4.5101	0.210172	4.22764	2.72696	0.386241	1.55597	8.47216	0.898585	13.9658	4.0982	0.00900436	12.8073	20.7519	0.433741	4.66451	8.79822	0.464393	68.1492	126.921	0.220699	17.6594	13.0818	0.372401	UGGUGGGCCGCAGAACAUGUGC	experimental		mature miRNA	standard	MIMAT0003330	hsa-miR-654-5p	hsa-miR-654-5p
818	hsa-miR-655-3p	0.052612	3.54597	1	11.7949	3.97569	0.0168417	12.1778	16.2662	0.563478	6.4286	4.24362	0.272162	4.38762	14.4663	0.530404	1.69567	12.3571	0.853822	12.0037	16.4637	0.00103	0.0123663	8.88739	1	AUAAUACAUGGUUAACCUCUUU	experimental		mature miRNA	standard	MIMAT0003331	hsa-miR-655-3p	hsa-miR-655-3p
819	hsa-miR-655-5p	0.0912616	4.2453	1	0.717329	2.18648	0.712909	0.00893804	11.3907	1	0.0393424	2.27262	1	2.27061	18.6567	0.685933	0.0121278	10.5451	1	3.99245	9.9814	4.04626e-05	0.012125	6.16541	1	AGAGGUUAUCCGUGUUAUGUUC	experimental		mature miRNA	standard	MIMAT0026626	hsa-miR-655-5p	hsa-miR-655-5p
820	hsa-miR-656-3p	0.0758576	6.01028	1	0.00780197	3.66725	1	0.00890835	6.10256	1	0.0411054	1.97416	1	27.293	63.3638	0.384952	4.00199	6.79305	0.49096	3.6282	12.4645	0.00304764	0.0154152	7.62453	1	AAUAUUAUACAGUCAACCUCU	experimental		mature miRNA	standard	MIMAT0003332	hsa-miR-656-3p	hsa-miR-656-3p
821	hsa-miR-656-5p	0.0497747	5.67194	1	6.12181	3.37615	0.274443	0.00928792	6.26151	1	0.0348839	3.24561	1	0.791289	15.4067	0.893644	4.74899	8.83863	0.421366	6.25947	11.712	0.000216628	64.9023	65.8665	0.378518	AGGUUGCCUGUGAGGUGUUCA	experimental		mature miRNA	standard	MIMAT0026627	hsa-miR-656-5p	hsa-miR-656-5p
822	hsa-miR-657	0.045934	6.78174	1	10.9095	3.73588	0.0298413	7.4262	7.5844	0.34469	0.0263119	3.87625	1	11.527	21.5636	0.31147	0.00901937	12.3641	1	8.90656	15.3665	0.000333656	52.0072	85.9781	0.54099	GGCAGGUUCUCACCCUCUCUAGG	experimental		mature miRNA	standard	MIMAT0003335	hsa-miR-657	hsa-miR-657
823	hsa-miR-658	17.6165	5.79119	0.00249341	12.0664	4.06824	0.167014	0.0139423	5.979	1	27.8131	8.17233	0.0114084	4.09109	23.1266	0.810401	14.7491	15.0583	0.195987	17.7241	15.9299	4.70394e-05	55.3102	46.2056	0.414607	GGCGGAGGGAAGUAGGUCCGUUGGU	experimental		mature miRNA	standard	MIMAT0003336	hsa-miR-658	hsa-miR-658
824	hsa-miR-659-3p	11.8146	7.89147	0.213399	14.0718	4.01778	0.0347618	2.36782	13.4389	0.9044	5.1719	2.31337	0.158558	10.0208	11.0217	0.19589	0.066064	10.5871	0.995115	12.2239	11.685	3.36461e-06	9.73942	7.30089	0.344297	CUUGGUUCAGGGAGGGUCCCCA	experimental		mature miRNA	standard	MIMAT0003337	hsa-miR-659-3p	hsa-miR-659-3p
825	hsa-miR-659-5p	0.431835	10.3711	0.993562	175.705	31.6193	3.57605e-07	0.0105416	5.54649	1	0.61842	3.07661	0.927597	21.3024	60.7476	0.510311	0.0111845	6.61045	1	3.96614	19.6698	0.120969	0.00999516	9.42561	1	AGGACCUUCCCUGAACCAAGGA	experimental		mature miRNA	standard	MIMAT0022710	hsa-miR-659-5p	hsa-miR-659-5p
826	hsa-miR-660-3p	0.0452732	4.72155	1	5.9419	4.73465	0.346043	8.75497	11.3445	0.482985	0.0274644	2.92084	1	14.6944	32.033	0.408589	1.189	16.525	0.916459	6.84255	18.7861	0.0261579	3.4872	5.3049	0.543695	ACCUCCUGUGUGCAUGGAUUA	experimental		mature miRNA	standard	MIMAT0022711	hsa-miR-660-3p	hsa-miR-660-3p
827	hsa-miR-660-5p	27.6812	8.03029	0.00138978	27.384	8.36022	0.0218774	30.2852	15.7137	0.230549	37.8998	9.47238	0.00074622	7.10238	25.3753	0.687598	12.5302	8.52604	0.0702284	14.3716	13.3374	0.000236888	0.0177895	7.28472	1	UACCCAUUGCAUAUCGGAGUUG	experimental		mature miRNA	standard	MIMAT0003338	hsa-miR-660-5p	hsa-miR-660-5p
828	hsa-miR-661	6.90437	5.23451	0.32009	6.78248	4.57307	0.347245	13.0127	12.4655	0.441902	0.0330875	2.40052	1	2.14108	20.5177	0.838401	4.57236	11.5131	0.606677	8.08449	16.0208	0.00825687	10.2813	14.3053	0.633078	UGCCUGGGUCUCUGGCCUGCGCGU	experimental		mature miRNA	standard	MIMAT0003324	hsa-miR-661	hsa-miR-661
829	hsa-miR-662	0.0487284	8.14916	1	12.6234	5.63729	0.162988	0.00916852	6.68962	1	0.0326302	3.17103	1	2.89681	13.3607	0.633181	3.50038	6.31101	0.395283	6.75631	11.1731	6.07929e-05	54.4982	81.6169	0.533135	UCCCACGUUGUGGCCCAGCAG	experimental		mature miRNA	standard	MIMAT0003325	hsa-miR-662	hsa-miR-662
830	hsa-miR-663a	424.46	23.9315	4.10041e-84	89.4499	14.4574	1.75867e-05	408.433	44.7576	1.61223e-16	252.654	21.6712	2.088e-32	76.2818	29.1238	0.0193525	244.26	25.9527	1.31265e-28	233.861	21.8271	7.82209e-43	128.31	19.937	1.42368e-05	AGGCGGGGCGCCGCGGGACCGC	experimental		mature miRNA	standard	MIMAT0003326	hsa-miR-663a	hsa-miR-663a
831	hsa-miR-663b	3.24163	4.16373	0.758704	11.1691	21.0153	0.706676	0.0113778	6.30345	1	1.70075	2.68031	0.76786	9.68967	13.848	0.207251	0.0118852	8.58855	1	7.79359	13.6155	0.000287186	0.845528	7.58921	0.930843	GGUGGCCCGGCCGUGCCUGAGG	experimental		mature miRNA	standard	MIMAT0005867	hsa-miR-663b	hsa-miR-663b
832	hsa-miR-664a-3p	54.2951	12.587	4.07811e-09	272.872	29.1047	1.59657e-15	128.853	18.7042	1.50247e-07	246.593	21.9355	8.25001e-30	147.275	26.4982	3.51894e-07	51.8598	20.9894	0.000605531	105.913	25.9006	3.56141e-10	17.5118	9.06567	0.219914	UAUUCAUUUAUCCCCAGCCUACA	experimental		mature miRNA	standard	MIMAT0005949	hsa-miR-664a-3p	hsa-miR-664a-3p
833	hsa-miR-664a-5p	29.0899	7.99818	0.000484869	18.0377	6.74415	0.0544151	21.6248	10.3693	0.18685	14.0323	4.58992	0.0169315	35.2051	23.8327	0.0705375	18.5665	15.1848	0.111741	36.5483	15.7025	9.72977e-10	0.0170602	9.85877	1	ACUGGCUAGGGAAAAUGAUUGGAU	experimental		mature miRNA	standard	MIMAT0005948	hsa-miR-664a-5p	hsa-miR-664a-5p
834	hsa-miR-664b-3p	495.53	23.8499	4.98248e-111	1456.23	50.026	6.01683e-180	252.127	22.9029	7.77946e-21	812.984	48.3541	5.88216e-64	476.118	72.7537	5.32473e-10	146.632	23.524	1.21838e-14	201.644	26.181	5.56913e-22	91.1401	10.6415	1.26966e-07	UUCAUUUGCCUCCCAGCCUACA	experimental		mature miRNA	standard	MIMAT0022272	hsa-miR-664b-3p	hsa-miR-664b-3p
835	hsa-miR-664b-5p	27.5852	10.2897	0.0122293	6.31205	3.57314	0.21399	12.6784	9.63494	0.420117	17.64	4.66181	0.00437149	13.4554	20.2675	0.359594	22.9398	8.80646	0.00104592	30.0027	23.44	0.000209664	0.018528	4.70931	1	UGGGCUAAGGGAGAUGAUUGGGUA	experimental		mature miRNA	standard	MIMAT0022271	hsa-miR-664b-5p	hsa-miR-664b-5p
836	hsa-miR-665	0.0527227	4.66971	1	10.0946	5.47845	0.146712	1.04735	7.40019	0.908095	7.77909	2.97422	0.0573307	5.79738	18.3382	0.533906	11.3096	10.0654	0.0940751	26.7701	23.0023	6.01177e-05	0.0126559	5.5301	1	ACCAGGAGGCUGAGGCCCCU	experimental		mature miRNA	standard	MIMAT0004952	hsa-miR-665	hsa-miR-665
837	hsa-miR-668-3p	192.993	21.0406	1.51204e-27	311.822	45.3962	5.11901e-10	396.494	27.6397	5.20863e-39	1718.93	84.7266	3.04579e-92	94.2917	29.9091	0.0049621	377.879	33.5624	1.1943e-36	846.008	73.4907	2.21134e-35	289.851	58.5189	0.000228925	UGUCACUCGGCUCGGCCCACUAC	experimental		mature miRNA	standard	MIMAT0003881	hsa-miR-668-3p	hsa-miR-668-3p
838	hsa-miR-668-5p	0.0609434	6.97551	1	0.070774	3.8706	0.984731	0.593455	7.75606	0.946572	4.61937	3.18111	0.414545	5.55756	17.8509	0.490884	1.77044	7.68904	0.781475	17.9246	21.7073	8.52522e-05	0.0153398	5.90177	1	UGCGCCUCGGGUGAGCAUG	experimental		mature miRNA	standard	MIMAT0026636	hsa-miR-668-5p	hsa-miR-668-5p
839	hsa-miR-670-3p	0.0528549	5.40572	1	1.14315	3.99346	0.839312	0.00999076	7.16078	1	1.77631	2.85809	0.756817	6.57043	21.7383	0.558346	6.12519	7.65401	0.248345	14.6577	17.4667	3.05246e-05	1.25855	5.38202	0.856255	UUUCCUCAUAUUCAUUCAGGA	experimental		mature miRNA	standard	MIMAT0026640	hsa-miR-670-3p	hsa-miR-670-3p
840	hsa-miR-670-5p	10.8312	8.08812	0.344934	3.9339	4.76014	0.55024	7.42787	9.04837	0.606177	14.0315	5.62903	0.0883407	3.01313	13.7555	0.695539	13.2389	11.2615	0.149933	24.8174	20.4378	6.94931e-05	0.0185274	4.93513	1	GUCCCUGAGUGUAUGUGGUG	experimental		mature miRNA	standard	MIMAT0010357	hsa-miR-670-5p	hsa-miR-670-5p
841	hsa-miR-671-3p	18.9335	9.39927	0.0724828	39.6776	8.61951	0.00680405	0.0134369	9.64529	1	9.11559	4.58101	0.221672	3.53228	23.6567	0.819205	11.3992	14.7912	0.306455	33.8635	23.4618	1.43688e-05	6.15308	6.51204	0.544872	UCCGGUUCUCAGGGCUCCACC	experimental		mature miRNA	standard	MIMAT0004819	hsa-miR-671-3p	hsa-miR-671-3p
842	hsa-miR-671-5p	100.879	13.8014	1.03802e-20	19.0514	3.36279	0.0044345	33.1439	14.4402	0.122182	35.5814	6.1993	7.79579e-08	27.1519	24.774	0.283531	116.912	26.5716	3.7592e-08	75.2496	16.2724	1.04812e-17	65.2559	15.0845	0.00502872	AGGAAGCCCUGGAGGGGCUGGAG	experimental		mature miRNA	standard	MIMAT0003880	hsa-miR-671-5p	hsa-miR-671-5p
843	hsa-miR-675-3p	3.12787	10.3901	0.903575	8.33986	3.47775	0.0621419	9.9574	6.19854	0.286977	6.25121	2.9242	0.202704	14.6085	17.0674	0.15083	0.0131695	12.5917	1	0.680415	17.4824	0.715502	0.014087	6.08728	1	CUGUAUGCCCUCACCGCUCA	experimental		mature miRNA	standard	MIMAT0006790	hsa-miR-675-3p	hsa-miR-675-3p
844	hsa-miR-675-5p	113.675	17.6491	5.64157e-13	11.7973	3.5689	0.117106	477.146	38.6418	2.20974e-27	3.00575	2.14203	0.54977	0.00325789	16.6573	1	13.7703	8.81949	0.0863545	3.18342	17.1806	0.353022	34.7703	47.2249	0.724263	UGGUGCGGAGAGGGCCCACAGUG	experimental		mature miRNA	standard	MIMAT0004284	hsa-miR-675-5p	hsa-miR-675-5p
845	hsa-miR-676-3p	253.621	32.8489	7.21597e-13	4.49233	3.34986	0.48579	3.05077	7.21039	0.835791	0.0727837	3.57115	1	0.00208875	18.4647	1	4.87689	8.67561	0.714658	0.000290672	10.6367	1	0.0270463	7.21458	1	CUGUCCUAAGGUUGUUGAGUU	experimental		mature miRNA	standard	MIMAT0018204	hsa-miR-676-3p	hsa-miR-676-3p
846	hsa-miR-676-5p	0.0495071	4.03493	1	10.7943	3.7537	0.152526	5.32254	8.24409	0.623353	0.038934	2.76659	1	5.10064	14.8787	0.504714	0.0125826	5.48801	1	0.000248559	14.5224	1	135.92	180.476	0.478435	UCUUCAACCUCAGGACUUGCA	experimental		mature miRNA	standard	MIMAT0018203	hsa-miR-676-5p	hsa-miR-676-5p
847	hsa-miR-708-3p	0.0378782	7.57369	1	18.4297	4.6982	0.109788	6.17577	7.587	0.615093	8.8833	2.7985	0.0609317	14.0149	17.1989	0.292276	8.80051	9.27946	0.241557	0.000406177	7.95711	1	22.3783	22.3031	0.407156	CAACUAGACUGUGAGCUUCUAG	experimental		mature miRNA	standard	MIMAT0004927	hsa-miR-708-3p	hsa-miR-708-3p
848	hsa-miR-708-5p	0.052694	5.69734	1	4.49498	3.02325	0.44719	6.6758	5.52067	0.422765	5.83723	3.18696	0.407286	0.00218464	15.8071	1	2.72668	7.2889	0.683987	0.0931312	10.9365	0.913448	1.95587	3.70315	0.749041	AAGGAGCUUACAAUCUAGCUGGG	experimental		mature miRNA	standard	MIMAT0004926	hsa-miR-708-5p	hsa-miR-708-5p
849	hsa-miR-711	3.91438	4.67559	0.663386	2.6318	3.64321	0.784366	0.0163779	6.87219	1	8.41633	6.09418	0.594739	3.23609	21.4464	0.811212	16.3383	11.6335	0.178075	0.000334249	12.9198	1	4.28724	6.70304	0.722985	GGGACCCAGGGAGAGACGUAAG	experimental		mature miRNA	standard	MIMAT0012734	hsa-miR-711	hsa-miR-711
850	hsa-miR-718	0.0534275	6.13811	1	0.632386	4.52025	0.895629	3.0305	6.20418	0.686508	7.86553	4.1368	0.169824	17.7855	25.2728	0.223251	2.76553	10.3152	0.714998	30.0783	19.8111	9.34933e-08	0.0135579	7.51542	1	CUUCCGCCCCGCCGGGCGUCG	experimental		mature miRNA	standard	MIMAT0012735	hsa-miR-718	hsa-miR-718
851	hsa-miR-744-3p	0.0861922	5.79918	1	3.08826	3.50533	0.327067	0.00855993	2.03267	1	0.0341012	3.20162	1	11.1691	52.5232	0.588038	0.0109622	10.8074	1	15.9961	16.8259	1.22706e-08	0.0106005	6.53191	1	CUGUUGCCACUAACCUCAACCU	experimental		mature miRNA	standard	MIMAT0004946	hsa-miR-744-3p	hsa-miR-744-3p
852	hsa-miR-744-5p	52.1782	11.5235	1.27626e-08	58.3946	10.6219	0.000634908	3.12469	6.67746	0.77576	18.1744	6.5123	0.0199886	23.7747	43.1273	0.562012	11.7065	16.3903	0.310599	51.8241	21.2403	3.09507e-08	22.7056	9.60985	0.122246	UGCGGGGCUAGGGCUAACAGCA	experimental		mature miRNA	standard	MIMAT0004945	hsa-miR-744-5p	hsa-miR-744-5p
853	hsa-miR-758-3p	0.0575824	6.25136	1	0.0868564	4.42171	0.986631	0.00949322	9.1736	1	10.794	2.14777	0.000958842	9.36037	37.1873	0.631342	0.0105727	13.2631	1	37.7839	41.8118	0.000629978	6.58177	9.55179	0.58762	UUUGUGACCUGGUCCACUAACC	experimental		mature miRNA	standard	MIMAT0003879	hsa-miR-758-3p	hsa-miR-758-3p
854	hsa-miR-758-5p	0.0646616	5.26832	1	0.0133811	3.5698	1	0.010231	10.2635	1	5.81162	2.94142	0.432293	0.00182695	25.7175	1	0.0127469	7.66171	1	10.5339	17.9382	2.45338e-05	92.1346	98.1918	0.515044	GAUGGUUGACCAGAGAGCACAC	experimental		mature miRNA	standard	MIMAT0022929	hsa-miR-758-5p	hsa-miR-758-5p
855	hsa-miR-759	0.0689111	4.76216	1	0.012613	4.23408	1	0.0102251	6.34431	1	4.35558	1.9932	0.420096	0.00173749	18.8636	1	0.0130719	6.29101	1	8.79296	20.2223	0.000715208	30.5894	45.3522	0.68279	GCAGAGUGCAAACAAUUUUGAC	experimental		mature miRNA	standard	MIMAT0010497	hsa-miR-759	hsa-miR-759
856	hsa-miR-760	0.0826686	5.2055	1	0.00805673	4.42609	1	0.00984481	7.423	1	8.07607	3.01386	0.176556	4.12887	21.7206	0.616196	0.0130417	8.30015	1	8.64018	22.8058	0.0033442	0.015698	10.5776	1	CGGCUCUGGGUCUGUGGGGA	experimental		mature miRNA	standard	MIMAT0004957	hsa-miR-760	hsa-miR-760
857	hsa-miR-761	0.960361	3.32085	0.959596	0.0093064	4.54789	1	0.0116711	12.7307	1	8.90278	2.159	0.137146	0.00150166	22.7148	1	0.0162086	16.2273	1	8.35017	17.9793	0.000219513	0.0229286	6.11362	1	GCAGCAGGGUGAAACUGACACA	experimental		mature miRNA	standard	MIMAT0010364	hsa-miR-761	hsa-miR-761
858	hsa-miR-762	753.065	63.5482	6.91717e-36	103.023	14.6479	1.53349e-07	580.684	80.5114	1.49587e-11	437.414	24.3865	3.69773e-74	195.557	68.5668	0.00792852	328.653	56.9353	3.88105e-11	601.455	57.3518	1.3828e-31	284.244	28.6669	1.56853e-13	GGGGCUGGGGCCGGGGCCGAGC	experimental		mature miRNA	standard	MIMAT0010313	hsa-miR-762	hsa-miR-762
859	hsa-miR-764	8.06751	5.33079	0.394115	15.2483	5.9856	0.0947068	0.0136192	8.24635	1	7.59987	4.20631	0.330098	2.2723	14.3523	0.762385	219.433	54.5204	5.1274e-06	13.0332	24.9018	0.0286613	0.017721	7.99567	1	GCAGGUGCUCACUUGUCCUCCU	experimental		mature miRNA	standard	MIMAT0010367	hsa-miR-764	hsa-miR-764
860	hsa-miR-765	284.873	34.2994	3.42906e-21	117.027	14.828	1.18149e-08	138.462	32.9992	0.000914309	172.127	19.7025	3.31887e-19	80.6263	22.7602	0.00147421	118.168	32.907	4.25936e-06	133.428	28.48	1.27214e-11	202.177	42.2792	0.000451567	UGGAGGAGAAGGAAGGUGAUG	experimental		mature miRNA	standard	MIMAT0003945	hsa-miR-765	hsa-miR-765
861	hsa-miR-766-3p	93.2347	18.5952	8.66551e-11	291.342	51.8741	2.056e-06	66.945	15.2897	0.00224064	49.9717	8.70533	1.52121e-08	118.128	108.84	0.320426	63.4018	33.8816	0.0110051	79.373	21.0042	1.72526e-10	42.9731	15.3257	0.0664299	ACUCCAGCCCCACAGCCUCAGC	experimental		mature miRNA	standard	MIMAT0003888	hsa-miR-766-3p	hsa-miR-766-3p
862	hsa-miR-766-5p	0.0510397	7.23152	1	4.56363	3.51492	0.39959	0.00991788	5.07897	1	0.967716	2.86669	0.870494	13.6497	38.5032	0.543853	2.30053	12.7877	0.798092	6.98033	15.5404	0.00517556	3.49799	7.38009	0.679385	AGGAGGAAUUGGUGCUGGUCUU	experimental		mature miRNA	standard	MIMAT0022714	hsa-miR-766-5p	hsa-miR-766-5p
863	hsa-miR-767-3p	0.0633986	8.06277	1	6.46038	4.78194	0.347302	0.0103374	9.98167	1	5.04789	3.57554	0.421744	3.96214	20.861	0.677727	0.010939	9.51566	1	2.85873	6.76249	0.00024509	1.01859	5.56024	0.86892	UCUGCUCAUACCCCAUGGUUUCU	experimental		mature miRNA	standard	MIMAT0003883	hsa-miR-767-3p	hsa-miR-767-3p
864	hsa-miR-767-5p	0.0354082	5.14817	1	0.0117012	5.17883	1	227.5	23.1808	2.98188e-20	2.76742	1.40526	0.170001	231.769	54.5822	1.45577e-06	0.00968206	5.7221	1	6.08704	16.1327	0.0128547	218.202	28.2192	3.34387e-11	UGCACCAUGGUUGUCUGAGCAUG	experimental		mature miRNA	standard	MIMAT0003882	hsa-miR-767-5p	hsa-miR-767-5p
865	hsa-miR-769-3p	0.0758689	8.54372	1	0.00827057	6.0279	1	17.8032	16.1075	0.378427	2.56664	4.45474	0.818946	0.0202965	25.4667	0.99681	0.0139683	9.78906	1	3.34097	12.7264	0.0115543	0.0187954	7.1808	1	CUGGGAUCUCCGGGGUCUUGGUU	experimental		mature miRNA	standard	MIMAT0003887	hsa-miR-769-3p	hsa-miR-769-3p
866	hsa-miR-769-5p	9.1778	8.14694	0.365819	9.12512	4.61056	0.191182	21.3929	11.5664	0.23479	17.8333	5.23635	0.00704156	17.4648	15.5954	0.141031	4.826	10.5568	0.566986	16.0066	34.1116	0.0940801	0.121637	6.7795	0.991278	UGAGACCUCUGGGUUCUGAGCU	experimental		mature miRNA	standard	MIMAT0003886	hsa-miR-769-5p	hsa-miR-769-5p
867	hsa-miR-770-5p	19.927	11.3136	0.0302423	86.1643	30.5875	0.0579629	22.2285	7.04674	0.0498129	32.7805	9.25481	0.00124242	40.9183	20.183	0.0426183	11.736	13.4481	0.205624	24.4145	18.505	0.000311838	11.4131	5.12262	0.135571	UCCAGUACCACGUGUCAGGGCCA	experimental		mature miRNA	standard	MIMAT0003948	hsa-miR-770-5p	hsa-miR-770-5p
868	hsa-miR-802	0.11235	4.41544	1	0.00805731	4.10472	1	0.00969787	6.62595	1	0.0603479	2.75364	1	0.00112506	17.1983	1	0.0157516	15.0898	1	1.23701	12.5118	0.0993413	0.0194292	8.10618	1	CAGUAACAAAGAUUCAUCCUUGU	experimental		mature miRNA	standard	MIMAT0004185	hsa-miR-802	hsa-miR-802
869	hsa-miR-873-3p	0.119696	8.67144	1	0.0117319	4.0629	1	0.012282	7.69329	1	0.0812547	2.36396	1	0.00123027	14.5288	1	0.0207647	10.8782	1	0.000134303	9.45471	1	0.0207979	5.25615	1	GGAGACUGAUGAGUUCCCGGGA	experimental		mature miRNA	standard	MIMAT0022717	hsa-miR-873-3p	hsa-miR-873-3p
870	hsa-miR-873-5p	0.0633726	4.03933	1	0.0134256	4.18754	1	0.010595	14.4866	1	1.83179	2.28984	0.77547	7.33106	14.9149	0.320392	0.013509	9.22372	1	0.0343217	19.6464	0.966284	13.7089	10.7198	0.365071	GCAGGAACUUGUGAGUCUCCU	experimental		mature miRNA	standard	MIMAT0004953	hsa-miR-873-5p	hsa-miR-873-5p
871	hsa-miR-874-3p	0.0800141	10.1603	1	7.78532	4.74997	0.358796	0.0138871	8.08431	1	21.5213	5.04943	0.0455826	0.0018451	20.0669	1	2.27382	15.5063	0.894821	0.0179821	22.6621	0.987955	0.0171577	5.58989	1	CUGCCCUGGCCCGAGGGACCGA	experimental		mature miRNA	standard	MIMAT0004911	hsa-miR-874-3p	hsa-miR-874-3p
872	hsa-miR-874-5p	0.0753128	5.5923	1	0.0139614	5.24601	1	0.010977	8.18757	1	0.0561231	3.7991	1	8.31129	11.7264	0.114192	0.0160321	10.3373	1	0.0001545	12.5421	1	5.06773	13.5929	0.797012	CGGCCCCACGCACCAGGGUAAGA	experimental		mature miRNA	standard	MIMAT0026718	hsa-miR-874-5p	hsa-miR-874-5p
873	hsa-miR-875-3p	0.105908	4.20141	1	0.0137959	3.06666	1	0.0140217	12.6524	1	10.1742	2.80271	0.325654	0.00152532	13.3425	1	0.020783	10.5935	1	0.000167118	15.7656	1	0.0218849	6.93732	1	CCUGGAAACACUGAGGUUGUG	experimental		mature miRNA	standard	MIMAT0004923	hsa-miR-875-3p	hsa-miR-875-3p
874	hsa-miR-875-5p	0.0740499	5.53039	1	0.0147702	3.35194	1	0.0110827	10.3973	1	0.0577978	2.44098	1	2.70483	17.737	0.694611	0.0161136	12.1738	1	0.000154462	13.9478	1	11.8271	26.6813	0.761369	UAUACCUCAGUUUUAUCAGGUG	experimental		mature miRNA	standard	MIMAT0004922	hsa-miR-875-5p	hsa-miR-875-5p
875	hsa-miR-876-3p	0.0952145	6.89356	1	193.851	24.0158	7.47615e-10	0.014857	9.57871	1	11.052	3.00245	0.176717	0.00173198	17.0352	1	0.0168717	10.3221	1	0.000251444	18.4255	1	0.0138866	7.86994	1	UGGUGGUUUACAAAGUAAUUCA	experimental		mature miRNA	standard	MIMAT0004925	hsa-miR-876-3p	hsa-miR-876-3p
876	hsa-miR-876-5p	0.0941707	5.61939	1	0.0125366	4.67328	1	0.0129902	5.90655	1	5.7501	2.73958	0.526961	0.74141	12.3676	0.851045	0.0186405	12.4854	1	0.000173277	15.6381	1	0.0178722	8.50521	1	UGGAUUUCUUUGUGAAUCACCA	experimental		mature miRNA	standard	MIMAT0004924	hsa-miR-876-5p	hsa-miR-876-5p
877	hsa-miR-877-3p	21.9606	10.6047	0.152043	40.3832	6.00767	1.92848e-07	14.4251	7.26199	0.229342	21.6375	4.23793	0.000163302	4.9284	11.7333	0.46036	0.0134063	16.5443	1	2.53749	12.6998	0.199791	0.0152395	6.1554	1	UCCUCUUCUCCCUCCUCCCAG	experimental		mature miRNA	standard	MIMAT0004950	hsa-miR-877-3p	hsa-miR-877-3p
878	hsa-miR-877-5p	43.2279	28.9797	0.066394	57.9976	11.1556	0.00139437	12.3271	10.2429	0.471054	26.6764	9.22921	0.0120824	32.4508	16.1276	0.0400998	5.77942	10.6192	0.467059	14.8583	17.6886	0.00590479	10.0608	12.7935	0.60937	GUAGAGGAGAUGGCGCAGGG	experimental		mature miRNA	standard	MIMAT0004949	hsa-miR-877-5p	hsa-miR-877-5p
879	hsa-miR-885-3p	11.1309	7.58908	0.520855	0.0158503	4.7124	1	0.0166107	7.59701	1	9.57564	4.09263	0.480357	1.33188	18.3974	0.873159	5.46428	15.8312	0.811672	0.000245697	14.8131	1	0.0255761	7.62883	1	AGGCAGCGGGGUGUAGUGGAUA	experimental		mature miRNA	standard	MIMAT0004948	hsa-miR-885-3p	hsa-miR-885-3p
880	hsa-miR-885-5p	8.88436	6.95374	0.540345	5.40846	4.61123	0.497901	13.1956	12.0583	0.559256	8.11539	4.78217	0.454289	6.41546	19.4463	0.563797	0.0177286	16.0223	1	0.000313565	12.7132	1	0.0168005	8.49931	1	UCCAUUACACUACCCUGCCUCU	experimental		mature miRNA	standard	MIMAT0004947	hsa-miR-885-5p	hsa-miR-885-5p
881	hsa-miR-887-3p	0.0785369	5.14266	1	23.2449	30.5078	0.579928	3.54114	14.745	0.861611	0.0424622	3.26319	1	4.51272	13.5451	0.395662	0.0145752	6.45465	1	0.000231778	17.443	1	0.0111919	5.28726	1	GUGAACGGGCGCCAUCCCGAGG	experimental		mature miRNA	standard	MIMAT0004951	hsa-miR-887-3p	hsa-miR-887-3p
882	hsa-miR-887-5p	0.0869651	5.36389	1	4.81634	3.59908	0.420601	4.11487	12.6858	0.840873	1.45178	2.56498	0.879989	0.0016167	18.1718	1	0.0174673	9.09629	1	0.000232442	18.848	1	0.0163309	9.4252	1	CUUGGGAGCCCUGUUAGACUC	experimental		mature miRNA	standard	MIMAT0026720	hsa-miR-887-5p	hsa-miR-887-5p
883	hsa-miR-888-3p	0.102602	7.19788	1	0.010594	4.45864	1	0.0113247	9.11236	1	0.062627	3.81491	1	2.35107	11.4527	0.513267	0.0181887	9.26944	1	0.000143145	11.1618	1	0.016325	6.40654	1	GACUGACACCUCUUUGGGUGAA	experimental		mature miRNA	standard	MIMAT0004917	hsa-miR-888-3p	hsa-miR-888-3p
884	hsa-miR-888-5p	0.0851037	5.14297	1	0.0120061	4.16981	1	26.678	39.6618	0.646347	0.0666126	2.25567	1	0.00143254	16.9822	1	0.474388	12.093	0.979814	0.000187988	15.306	1	0.0222111	6.34085	1	UACUCAAAAAGCUGUCAGUCA	experimental		mature miRNA	standard	MIMAT0004916	hsa-miR-888-5p	hsa-miR-888-5p
885	hsa-miR-889-3p	0.0673154	4.51835	1	7.73635	3.92673	0.313247	11.3862	5.59369	0.24273	4.25685	1.59776	0.369573	0.00196892	11.8968	1	7.60905	9.14185	0.449234	0.000321106	19.7866	1	0.0180315	6.71749	1	UUAAUAUCGGACAACCAUUGU	experimental		mature miRNA	standard	MIMAT0004921	hsa-miR-889-3p	hsa-miR-889-3p
886	hsa-miR-889-5p	0.0541678	5.45071	1	0.0194089	5.15928	1	23.3573	16.6958	0.400013	9.01686	3.09453	0.309173	0.00224625	11.8071	1	7.88317	9.91163	0.486571	0.000276281	16.6802	1	3.12756	5.29524	0.795186	AAUGGCUGUCCGUAGUAUGGUC	experimental		mature miRNA	standard	MIMAT0026719	hsa-miR-889-5p	hsa-miR-889-5p
887	hsa-miR-890	0.0656731	5.003	1	22.979	23.0055	0.576052	0.175447	6.40939	0.9826	0.0442559	3.16569	1	2.13267	12.3855	0.672079	0.0136762	7.70645	1	0.000223492	20.6966	1	4.29979	5.69523	0.485153	UACUUGGAAAGGCAUCAGUUG	experimental		mature miRNA	standard	MIMAT0004912	hsa-miR-890	hsa-miR-890
888	hsa-miR-891a-3p	0.0588823	5.02048	1	1.27508	4.34469	0.881952	0.0117323	7.06233	1	0.0479268	2.32178	1	15.463	28.5692	0.344172	9.79157	6.56559	0.102035	0.000237495	20.0106	1	3.24651	7.06441	0.724461	AGUGGCACAUGUUUGUUGUGAG	experimental		mature miRNA	standard	MIMAT0026717	hsa-miR-891a-3p	hsa-miR-891a-3p
889	hsa-miR-891a-5p	4.67678	4.71294	0.80602	0.0113722	5.13762	1	0.0131528	6.85077	1	0.068492	2.51395	1	3.23319	26.7104	0.74308	0.0206274	8.89669	1	0.000156848	10.6054	1	0.0200141	5.57305	1	UGCAACGAACCUGAGCCACUGA	experimental		mature miRNA	standard	MIMAT0004902	hsa-miR-891a-5p	hsa-miR-891a-5p
890	hsa-miR-891b	0.0859282	3.50168	1	0.0129949	4.98239	1	1.46437	9.32906	0.914978	0.0711567	4.01376	1	0.00146774	18.9254	1	6.15778	12.9593	0.715706	0.000190998	13.3078	1	0.0230388	5.37665	1	UGCAACUUACCUGAGUCAUUGA	experimental		mature miRNA	standard	MIMAT0004913	hsa-miR-891b	hsa-miR-891b
891	hsa-miR-892a	0.055334	4.22076	1	0.0152484	4.09212	1	2.16899	5.51793	0.77157	0.0505494	3.74319	1	3.80494	20.9886	0.692505	7.93284	6.74231	0.243359	0.000223304	15.0047	1	2.91234	7.51436	0.818625	CACUGUGUCCUUUCUGCGUAG	experimental		mature miRNA	standard	MIMAT0004907	hsa-miR-892a	hsa-miR-892a
892	hsa-miR-892b	6.26047	7.02408	0.718408	4.76171	4.99223	0.636033	0.0165066	6.9265	1	4.32908	1.86712	0.46352	1.80691	12.8682	0.772512	8.43644	7.31022	0.336748	0.000306407	8.94807	1	0.0187937	8.68408	1	CACUGGCUCCUUUCUGGGUAGA	experimental		mature miRNA	standard	MIMAT0004918	hsa-miR-892b	hsa-miR-892b
893	hsa-miR-892c-3p	0.0582678	5.36328	1	4.64464	4.44748	0.616292	0.0121234	6.37759	1	0.146651	2.00196	0.985208	16.0958	17.7624	0.128192	4.35374	11.2744	0.680215	0.000255494	12.499	1	2.67848	5.36884	0.685096	CACUGUUUCCUUUCUGAGUGGA	experimental		mature miRNA	standard	MIMAT0025858	hsa-miR-892c-3p	hsa-miR-892c-3p
894	hsa-miR-892c-5p	0.0574	5.77267	1	0.0134548	5.03148	1	32.8296	38.4318	0.57488	4.58424	2.36533	0.443556	8.0759	16.9638	0.374432	10.4231	9.90832	0.318451	0.00028158	16.3044	1	0.0187982	4.10797	1	UAUUCAGAAAGGUGCCAGUCA	experimental		mature miRNA	standard	MIMAT0025857	hsa-miR-892c-5p	hsa-miR-892c-5p
895	hsa-miR-920	0.0623277	4.25509	1	0.0138313	3.93602	1	6.84378	7.74112	0.581396	8.69166	3.1251	0.254058	2.55646	16.5852	0.73363	5.15053	13.3861	0.737498	0.000265963	14.2302	1	0.0193239	9.94365	1	GGGGAGCUGUGGAAGCAGUA	experimental		mature miRNA	standard	MIMAT0004970	hsa-miR-920	hsa-miR-920
896	hsa-miR-921	3.24802	6.03464	0.732133	9.0751	3.65361	0.293951	13.8483	7.79341	0.354946	17.9393	3.76188	0.00468102	28.6588	12.2811	0.00839952	15.0337	15.8993	0.328094	0.000445671	9.73444	1	0.669692	8.04376	0.960418	CUAGUGAGGGACAGAACCAGGAUUC	experimental		mature miRNA	standard	MIMAT0004971	hsa-miR-921	hsa-miR-921
897	hsa-miR-922	0.0889092	4.21851	1	0.0122114	4.41278	1	0.0127237	7.77124	1	6.66001	3.02315	0.451597	9.38677	19.0369	0.284927	0.0178331	10.2802	1	0.000178898	12.4593	1	0.0165219	10.0282	1	GCAGCAGAGAAUAGGACUACGUC	experimental		mature miRNA	standard	MIMAT0004972	hsa-miR-922	hsa-miR-922
898	hsa-miR-924	0.0705116	5.08618	1	0.0142855	3.55776	1	0.0134195	10.2254	1	10.5721	3.65252	0.253411	22.3454	31.9341	0.246224	10.4511	10.1103	0.346656	0.00023522	16.769	1	0.018033	5.72503	1	AGAGUCUUGUGAUGUCUUGC	experimental		mature miRNA	standard	MIMAT0004974	hsa-miR-924	hsa-miR-924
899	hsa-miR-933	0.0424768	6.32239	1	8.95998	4.90086	0.110127	876.376	122.004	6.62968e-12	4.26516	3.25775	0.293239	24.5826	18.855	0.0401505	6.57764	9.07335	0.26598	35.2864	25.5309	8.35422e-05	0.0120897	6.91004	1	UGUGCGCAGGGAGACCUCUCCC	experimental		mature miRNA	standard	MIMAT0004976	hsa-miR-933	hsa-miR-933
900	hsa-miR-934	0.0475894	4.26001	1	11.281	3.33613	0.0335662	0.0099719	6.46502	1	1.77076	2.56124	0.697404	13.6888	13.8046	0.10519	4.02738	5.31977	0.241345	17.1665	27.7015	0.00619681	5.10047	7.22411	0.523806	UGUCUACUACUGGAGACACUGG	experimental		mature miRNA	standard	MIMAT0004977	hsa-miR-934	hsa-miR-934
901	hsa-miR-935	0.0722837	6.99339	1	4.36954	5.43399	0.442793	0.00904404	5.54147	1	0.0341327	2.9048	1	9.41282	15.5721	0.150363	3.2897	8.868	0.615806	14.2095	23.4226	0.000730795	0.0116714	4.0736	1	CCAGUUACCGCUUCCGCUACCGC	experimental		mature miRNA	standard	MIMAT0004978	hsa-miR-935	hsa-miR-935
902	hsa-miR-936	55.9017	17.2287	4.75257e-06	102.486	22.1632	0.0011902	25.7509	9.28487	0.0717528	121.621	13.2691	4.67418e-21	346.748	57.9381	1.56866e-08	47.5015	12.3977	5.07427e-08	80.3467	16.4538	8.05665e-17	288.735	78.4887	0.00355877	ACAGUAGAGGGAGGAAUCGCAG	experimental		mature miRNA	standard	MIMAT0004979	hsa-miR-936	hsa-miR-936
903	hsa-miR-937-3p	0.0487324	5.67413	1	8.10127	3.61721	0.152976	0.010226	5.32291	1	6.51796	4.90919	0.36617	16.1292	23.4408	0.277084	2.01765	8.55435	0.729365	20.546	26.6595	0.00152005	2.55332	7.1147	0.75112	AUCCGCGCUCUGACUCUCUGCC	experimental		mature miRNA	standard	MIMAT0004980	hsa-miR-937-3p	hsa-miR-937-3p
904	hsa-miR-937-5p	140.748	17.3596	5.24737e-24	22.7978	5.37528	0.0261886	282.32	45.1667	3.77818e-08	79.5672	16.1713	4.81432e-07	73.3249	23.799	0.00416792	126.504	15.3379	2.1157e-25	157.77	23.4546	9.58806e-22	327.773	67.4227	0.000124831	GUGAGUCAGGGUGGGGCUGG	experimental		mature miRNA	standard	MIMAT0022938	hsa-miR-937-5p	hsa-miR-937-5p
905	hsa-miR-938	0.0577569	6.45989	1	11.4494	4.39065	0.0632374	0.00979605	4.13336	1	3.97201	2.68571	0.349645	27.3598	73.5822	0.553771	0.00991426	8.17045	1	9.7217	12.8224	5.38243e-06	2.16456	9.14477	0.811934	UGCCCUUAAAGGUGAACCCAGU	experimental		mature miRNA	standard	MIMAT0004981	hsa-miR-938	hsa-miR-938
906	hsa-miR-939-3p	0.0441988	6.24363	1	11.802	3.74677	0.046437	0.00996881	7.31319	1	6.97093	2.76296	0.0562444	264.902	42.8591	1.79769e-11	1.64212	12.684	0.840314	20.5546	19.0928	2.55398e-05	4.85214	5.78649	0.412998	CCCUGGGCCUCUGCUCCCCAG	experimental		mature miRNA	standard	MIMAT0022939	hsa-miR-939-3p	hsa-miR-939-3p
907	hsa-miR-939-5p	25.6447	10.5851	0.00211196	11.0409	4.65705	0.234443	21.8771	10.0653	0.155437	17.3843	6.3253	0.0223215	9.15841	17.8503	0.553552	6.57985	12.0666	0.452294	39.2924	14.3867	3.1949e-12	73.222	28.4237	0.0747761	UGGGGAGCUGAGGCUCUGGGGGUG	experimental		mature miRNA	standard	MIMAT0004982	hsa-miR-939-5p	hsa-miR-939-5p
908	hsa-miR-940	10.1978	6.10434	0.0724429	41.47	6.98876	0.000183059	14.5501	9.34724	0.293249	2.72283	4.21505	0.646043	123.161	149.18	0.396419	4.53545	9.43083	0.478629	36.6538	12.5349	1.65543e-14	14.018	4.87609	0.0337762	AAGGCAGGGCCCCCGCUCCCC	experimental		mature miRNA	standard	MIMAT0004983	hsa-miR-940	hsa-miR-940
909	hsa-miR-941	0.0638093	2.9249	1	1.78307	3.70581	0.570776	322.538	44.5399	7.75841e-12	0.0282053	3.78077	1	5.8823	15.0686	0.301162	0.0106585	11.1851	1	8.36274	10.8265	5.2674e-07	0.0114197	4.30552	1	CACCCGGCUGUGUGCACAUGUGC	experimental		mature miRNA	standard	MIMAT0004984	hsa-miR-941	hsa-miR-941
910	hsa-miR-942-3p	0.944977	5.77621	0.925566	6.36315	4.92497	0.476047	29.2793	41.5121	0.601076	99.4477	20.3549	1.17649e-06	6.64225	16.3047	0.57101	0.0103435	11.063	1	14.8008	10.8781	3.94205e-08	74.0301	104.194	0.566417	CACAUGGCCGAAACAGAGAAGU	experimental		mature miRNA	standard	MIMAT0026734	hsa-miR-942-3p	hsa-miR-942-3p
911	hsa-miR-942-5p	221.196	27.6526	7.14082e-14	2.3921	3.64842	0.584727	0.0127104	5.38776	1	0.0453755	3.43218	1	6.32708	13.7487	0.341067	1.68659	9.75524	0.874651	5.05099	14.948	0.0143446	0.0189905	5.48161	1	UCUUCUCUGUUUUGGCCAUGUG	experimental		mature miRNA	standard	MIMAT0004985	hsa-miR-942-5p	hsa-miR-942-5p
912	hsa-miR-943	11.2558	6.08117	0.248964	17.4891	6.80942	0.0275851	3.42348	6.14786	0.672953	0.0313047	3.33716	1	53.8861	90.9617	0.397392	5.39982	8.02454	0.394088	13.2962	18.1123	0.000815006	0.0142424	6.08974	1	CUGACUGUUGCCGUCCUCCAG	experimental		mature miRNA	standard	MIMAT0004986	hsa-miR-943	hsa-miR-943
913	hsa-miR-944	0.0727388	3.38249	1	5.06021	2.85911	0.103866	0.00925662	7.79228	1	0.0349782	2.05725	1	10.3323	15.2458	0.115297	3.10448	8.85464	0.644976	5.59043	17.9637	0.0186905	0.0116432	6.39649	1	AAAUUAUUGUACAUCGGAUGAG	experimental		mature miRNA	standard	MIMAT0004987	hsa-miR-944	hsa-miR-944
914	hsa-miR-1178-3p	0.0677928	5.41184	1	0.0112624	3.34849	1	2.90391	7.12222	0.74956	5.23559	1.8931	0.267586	0.00170519	14.9031	1	0.0139578	8.4447	1	1.82749	12.3228	0.100207	1.48594	5.29989	0.885299	UUGCUCACUGUUCUUCCCUAG	experimental		mature miRNA	standard	MIMAT0005823	hsa-miR-1178-3p	hsa-miR-1178-3p
915	hsa-miR-1178-5p	0.11325	3.58874	1	0.008448	2.67942	1	0.00999091	9.80092	1	0.062653	2.07651	1	0.00113781	15.7924	1	0.0163098	10.0679	1	0.39156	13.974	0.555853	0.0195966	7.25455	1	CAGGGUCAGCUGAGCAUG	experimental		mature miRNA	standard	MIMAT0022940	hsa-miR-1178-5p	hsa-miR-1178-5p
916	hsa-miR-1179	2.69831	4.63944	0.889443	0.00880811	4.66562	1	5.93587	20.2949	0.831263	0.0592584	2.72598	1	0.00138049	17.7378	1	0.0176638	7.61779	1	0.315997	13.1566	0.670038	0.0239038	5.341	1	AAGCAUUCUUUCAUUGGUUGG	experimental		mature miRNA	standard	MIMAT0005824	hsa-miR-1179	hsa-miR-1179
917	hsa-miR-1180-3p	6.72778	4.68093	0.674513	0.00948645	4.0031	1	0.0116843	6.59842	1	0.0650626	4.44147	1	0.00144037	14.3673	1	1.66363	10.0454	0.897024	2.93042	10.8893	0.00303025	0.0262921	6.75297	1	UUUCCGGCUCGCGUGGGUGUGU	experimental		mature miRNA	standard	MIMAT0005825	hsa-miR-1180-3p	hsa-miR-1180-3p
918	hsa-miR-1180-5p	284.907	39.127	9.55704e-12	0.010073	2.91459	1	0.0141926	9.74834	1	12.0448	3.5376	0.150181	5.07772	20.3933	0.61971	0.0179805	5.52302	1	2.35464	12.9672	0.0733661	0.024901	7.57529	1	GGACCCACCCGGCCGGGAAUA	experimental		mature miRNA	standard	MIMAT0026735	hsa-miR-1180-5p	hsa-miR-1180-5p
919	hsa-miR-1181	9.32144	7.00548	0.418324	0.00989685	6.13491	1	12.3658	11.1386	0.459808	5.67644	3.15037	0.381834	2.99966	20.3324	0.767852	6.87845	12.2683	0.560411	10.9237	13.7002	3.9588e-05	0.0237475	5.93589	1	CCGUCGCCGCCACCCGAGCCG	experimental		mature miRNA	standard	MIMAT0005826	hsa-miR-1181	hsa-miR-1181
920	hsa-miR-1182	13.7379	5.3592	0.159335	0.0114031	5.41354	1	0.0136284	7.49977	1	25.7606	8.07651	0.0835455	2.12679	19.4816	0.820661	12.0227	15.0553	0.431214	4.48003	18.4768	0.0827486	0.0246646	5.61346	1	GAGGGUCUUGGGAGGGAUGUGAC	experimental		mature miRNA	standard	MIMAT0005827	hsa-miR-1182	hsa-miR-1182
921	hsa-miR-1183	14.0395	6.6539	0.39277	0.00899068	4.08981	1	0.0119796	7.40702	1	1.34285	4.01174	0.919546	4.82692	20.833	0.587042	0.0163894	12.4189	1	1.29013	11.8827	0.166447	0.0205658	6.87377	1	CACUGUAGGUGAUGGUGAGAGUGGGCA	experimental		mature miRNA	standard	MIMAT0005828	hsa-miR-1183	hsa-miR-1183
922	hsa-miR-1184	0.0975886	5.22464	1	0.00725668	7.09446	1	0.00894231	10.7343	1	0.0472573	2.81703	1	1.00688	17.3572	0.822204	0.01385	11.5778	1	1.78973	12.7159	0.0394223	0.0155881	14.6102	1	CCUGCAGCGACUUGAUGGCUUCC	experimental		mature miRNA	standard	MIMAT0005829	hsa-miR-1184	hsa-miR-1184
923	hsa-miR-1185-1-3p	19.0467	7.93888	0.235642	0.00970854	5.10909	1	0.0123419	12.4112	1	0.854691	3.7906	0.950734	1.28768	23.0594	0.882927	0.933022	11.8929	0.949641	2.89369	16.742	0.0967572	0.0232467	9.0842	1	AUAUACAGGGGGAGACUCUUAU	experimental		mature miRNA	standard	MIMAT0022838	hsa-miR-1185-1-3p	hsa-miR-1185-1-3p
924	hsa-miR-1185-2-3p	6.80395	8.13148	0.55454	207.172	25.7626	8.94534e-10	0.0135997	5.92747	1	9.66269	4.28264	0.166993	1.79051	25.247	0.90659	8.91646	14.3096	0.406294	7.89221	8.59121	2.71218e-05	8.52395	9.98902	0.556324	AUAUACAGGGGGAGACUCUCAU	experimental		mature miRNA	standard	MIMAT0022713	hsa-miR-1185-2-3p	hsa-miR-1185-2-3p
925	hsa-miR-1185-5p	0.0952058	4.14115	1	0.00722545	3.10881	1	0.00889154	6.51859	1	0.0456367	3.64974	1	3.79699	20.1296	0.546958	0.0136679	11.1078	1	1.30169	11.9453	0.0884741	0.0149772	9.987	1	AGAGGAUACCCUUUGUAUGUU	experimental		mature miRNA	standard	MIMAT0005798	hsa-miR-1185-5p	hsa-miR-1185-5p
926	hsa-miR-1193	0.0998447	2.92358	1	0.00748591	5.6731	1	0.00913886	6.94873	1	0.0495676	3.23994	1	0.382562	22.3163	0.940227	0.0142755	14.8164	1	1.14702	13.7924	0.174713	0.0161339	7.60444	1	GGGAUGGUAGACCGGUGACGUGC	experimental		mature miRNA	standard	MIMAT0015049	hsa-miR-1193	hsa-miR-1193
927	hsa-miR-1197	0.0960307	5.97196	1	0.00747378	4.7908	1	0.00908577	5.94017	1	0.0470546	3.06356	1	3.25424	21.3438	0.620212	0.0140291	8.4353	1	0.603162	15.244	0.46768	0.0151415	5.60129	1	UAGGACACAUGGUCUACUUCU	experimental		mature miRNA	standard	MIMAT0005955	hsa-miR-1197	hsa-miR-1197
928	hsa-miR-1199-3p	0.112617	5.03324	1	0.0081715	4.62347	1	0.00978405	7.22319	1	0.0610239	2.68045	1	0.00112884	27.0962	1	0.0159155	7.62466	1	0.878826	15.0687	0.295039	0.0194788	7.18856	1	UGCGGCCGGUGCUCAACCUGC	experimental		mature miRNA	standard	MIMAT0031120	hsa-miR-1199-3p	hsa-miR-1199-3p
929	hsa-miR-1199-5p	0.112204	4.99571	1	0.00799549	6.83308	1	0.00965102	8.66159	1	0.059981	4.76534	1	0.001123	15.296	1	0.0156626	7.96783	1	1.49158	11.8453	0.0444086	0.0194021	7.89809	1	CCUGAGCCCGGGCCGCGCAG	experimental		mature miRNA	standard	MIMAT0031119	hsa-miR-1199-5p	hsa-miR-1199-5p
930	hsa-miR-1200	0.0940258	4.74866	1	0.00710991	4.60224	1	0.00879122	5.30407	1	0.044485	2.88002	1	6.49076	34.6598	0.583553	0.0134517	14.7221	1	1.62133	20.0348	0.230721	0.0146974	6.81801	1	CUCCUGAGCCAUUCUGAGCCUC	experimental		mature miRNA	standard	MIMAT0005863	hsa-miR-1200	hsa-miR-1200
931	hsa-miR-1202	0.112507	6.01637	1	0.00812444	3.72281	1	0.00974859	8.43014	1	0.0607455	2.80568	1	0.00112729	19.115	1	0.015848	12.2168	1	1.01121	9.74372	0.0705108	0.0194584	7.79948	1	GUGCCAGCUGCAGUGGGGGAG	experimental		mature miRNA	standard	MIMAT0005865	hsa-miR-1202	hsa-miR-1202
932	hsa-miR-1203	0.112426	6.71903	1	0.00808973	4.05213	1	0.00972238	6.01995	1	0.06054	1.97261	1	0.00112614	21.5792	1	0.0157982	11.7255	1	1.12205	12.7598	0.134104	0.0194433	9.23524	1	CCCGGAGCCAGGAUGCAGCUC	experimental		mature miRNA	standard	MIMAT0005866	hsa-miR-1203	hsa-miR-1203
933	hsa-miR-1204	0.0965049	5.32403	1	0.00972025	5.40868	1	0.0105102	5.428	1	0.0628555	4.85686	1	0.0012787	29.0986	1	2.71852	10.242	0.81579	0.28693	9.68912	0.575275	0.0213884	6.2747	1	UCGUGGCCUGGUCUCCAUUAU	experimental		mature miRNA	standard	MIMAT0005868	hsa-miR-1204	hsa-miR-1204
934	hsa-miR-1205	397.994	52.6858	1.34184e-12	0.010969	4.03463	1	0.0142154	7.42632	1	0.0741814	4.47093	1	0.0017295	21.9434	1	6.18677	8.52667	0.595159	1.28114	11.3416	0.173968	0.0337921	4.05241	1	UCUGCAGGGUUUGCUUUGAG	experimental		mature miRNA	standard	MIMAT0005869	hsa-miR-1205	hsa-miR-1205
935	hsa-miR-1206	0.0921267	2.97475	1	0.00779082	5.23814	1	5.95773	9.42833	0.590058	0.0518432	2.03974	1	0.00120813	16.4312	1	0.0151013	5.66938	1	1.17426	11.3764	0.129865	0.0196828	7.75113	1	UGUUCAUGUAGAUGUUUAAGC	experimental		mature miRNA	standard	MIMAT0005870	hsa-miR-1206	hsa-miR-1206
936	hsa-miR-1207-3p	0.0919835	3.82555	1	0.00985416	7.34998	1	0.0104926	7.16228	1	0.0616912	2.59253	1	0.00131249	29.3391	1	10.8357	8.41376	0.205023	0.480559	8.48003	0.349057	0.0218091	8.03929	1	UCAGCUGGCCCUCAUUUC	experimental		mature miRNA	standard	MIMAT0005872	hsa-miR-1207-3p	hsa-miR-1207-3p
937	hsa-miR-1207-5p	60.3499	22.4237	0.000642821	0.0166458	7.2662	1	36.2774	11.7931	0.035337	39.0973	6.57145	2.09745e-06	23.0658	21.8058	0.262113	136.218	26.3447	3.33206e-09	16.3432	10.9503	8.56597e-08	39.0492	8.4028	0.0305224	UGGCAGGGAGGCUGGGAGGGG	experimental		mature miRNA	standard	MIMAT0005871	hsa-miR-1207-5p	hsa-miR-1207-5p
938	hsa-miR-1208	0.0998965	4.25668	1	0.009328	6.30462	1	0.0109464	8.03771	1	5.89044	2.93768	0.5027	0.00137742	15.091	1	0.0156785	10.5217	1	1.82508	17.9546	0.186056	0.0203647	6.65881	1	UCACUGUUCAGACAGGCGGA	experimental		mature miRNA	standard	MIMAT0005873	hsa-miR-1208	hsa-miR-1208
939	hsa-miR-1224-3p	18.2424	10.2659	0.199807	0.0112774	5.57061	1	8.23515	6.63246	0.454274	27.0471	9.79564	0.0962484	0.55296	12.6825	0.921205	13.476	16.325	0.407154	6.0334	10.283	0.00068111	0.0268648	7.5643	1	CCCCACCUCCUCUCUCCUCAG	experimental		mature miRNA	standard	MIMAT0005459	hsa-miR-1224-3p	hsa-miR-1224-3p
940	hsa-miR-1224-5p	58.9103	14.4243	6.53416e-08	12.1046	15.6579	0.711351	22.0792	5.32926	0.0080313	31.3189	6.38731	9.64509e-06	30.122	25.8713	0.25559	105.832	25.0838	1.47741e-07	28.2323	15.7743	3.18619e-06	40.4729	7.35262	0.000743005	GUGAGGACUCGGGAGGUGG	experimental		mature miRNA	standard	MIMAT0005458	hsa-miR-1224-5p	hsa-miR-1224-5p
941	hsa-miR-1225-3p	6.19534	7.47872	0.758884	0.00915183	7.17206	1	0.0111088	4.385	1	0.050577	2.36001	1	3.47663	10.8116	0.416999	10.2076	9.60654	0.284892	2.03851	10.1176	0.0292476	0.0214145	5.17762	1	UGAGCCCCUGUGCCGCCCCCAG	experimental		mature miRNA	standard	MIMAT0005573	hsa-miR-1225-3p	hsa-miR-1225-3p
942	hsa-miR-1225-5p	0.095153	3.8594	1	0.00947968	4.56372	1	0.010325	4.92582	1	0.0612642	3.01771	1	0.00127681	12.8096	1	3.49528	12.944	0.804617	0.623126	10.9723	0.354393	0.0213628	5.03258	1	GUGGGUACGGCCCAGUGGGGGG	experimental		mature miRNA	standard	MIMAT0005572	hsa-miR-1225-5p	hsa-miR-1225-5p
943	hsa-miR-1226-3p	0.0859483	4.41208	1	0.0102585	5.2541	1	0.0110139	5.04186	1	1.23748	3.25756	0.92168	0.00146748	13.6039	1	6.0915	15.0699	0.692036	1.77585	15.1281	0.173292	0.0221226	8.63997	1	UCACCAGCCCUGUGUUCCCUAG	experimental		mature miRNA	standard	MIMAT0005577	hsa-miR-1226-3p	hsa-miR-1226-3p
944	hsa-miR-1226-5p	0.0989193	4.76329	1	0.00976617	6.42198	1	0.0113075	8.14651	1	10.6061	4.06766	0.333935	0.00142167	13.2688	1	0.0159932	10.7437	1	0.974452	12.4475	0.252427	0.0205869	4.6634	1	GUGAGGGCAUGCAGGCCUGGAUGGGG	experimental		mature miRNA	standard	MIMAT0005576	hsa-miR-1226-5p	hsa-miR-1226-5p
945	hsa-miR-1227-3p	290.839	31.2684	1.39759e-16	0.00924371	6.99441	1	0.845256	8.48644	0.947582	0.0671327	3.31523	1	0.00157472	16.4522	1	0.0201556	11.0305	1	1.24506	9.44462	0.0820584	0.0303802	6.62784	1	CGUGCCACCCUUUUCCCCAG	experimental		mature miRNA	standard	MIMAT0005580	hsa-miR-1227-3p	hsa-miR-1227-3p
946	hsa-miR-1227-5p	96.2994	14.4271	2.63572e-18	43.1388	13.6391	0.0689853	128.313	18.3918	5.42957e-08	106.596	15.7163	4.02985e-12	59.5927	26.0425	0.0333094	173.725	45.6296	3.5339e-06	139.598	17.5019	3.51656e-31	98.3797	23.3623	0.00405288	GUGGGGCCAGGCGGUGG	experimental		mature miRNA	standard	MIMAT0022941	hsa-miR-1227-5p	hsa-miR-1227-5p
947	hsa-miR-1228-3p	0.0812518	6.71301	1	0.0106671	4.41252	1	0.0115231	6.58538	1	16.9159	5.38975	0.165639	0.00161719	15.7075	1	3.4841	12.1119	0.780605	4.83933	10.5609	0.000121194	0.022399	8.10712	1	UCACACCUGCCUCGCCCCCC	experimental		mature miRNA	standard	MIMAT0005583	hsa-miR-1228-3p	hsa-miR-1228-3p
948	hsa-miR-1228-5p	111.806	42.0411	0.000870945	0.0174022	5.97082	1	62.7134	14.2818	0.00137346	94.2002	14.1825	6.84943e-10	110	25.4582	2.54823e-05	167.126	44.3486	1.58838e-05	37.1503	15.7472	2.51358e-09	99.8074	17.7566	0.00180265	GUGGGCGGGGGCAGGUGUGUG	experimental		mature miRNA	standard	MIMAT0005582	hsa-miR-1228-5p	hsa-miR-1228-5p
949	hsa-miR-1229-3p	4.11843	6.32767	0.8758	0.0113216	6.76361	1	0.0130666	9.16216	1	0.067917	2.78726	1	3.75666	15.4273	0.51728	0.0204857	10.7159	1	0.000156595	8.09272	1	0.0197803	7.1202	1	CUCUCACCACUGCCCUCCCACAG	experimental		mature miRNA	standard	MIMAT0005584	hsa-miR-1229-3p	hsa-miR-1229-3p
950	hsa-miR-1229-5p	29.6792	10.6943	0.00199432	0.01925	4.72134	1	9.69403	11.5977	0.624391	35.7272	10.8982	0.0415928	0.00328557	27.6936	1	155.075	26.9249	3.55655e-10	14.8592	13.6374	1.24752e-05	120.249	16.6367	0.000290505	GUGGGUAGGGUUUGGGGGAGAGCG	experimental		mature miRNA	standard	MIMAT0022942	hsa-miR-1229-5p	hsa-miR-1229-5p
951	hsa-miR-1231	0.0838706	9.54897	1	0.0122836	4.7844	1	0.0118662	9.38735	1	0.061663	2.92799	1	2.62944	15.9956	0.646588	9.95495	11.2115	0.435609	0.000182275	16.9527	1	0.0181199	5.93041	1	GUGUCUGGGCGGACAGCUGC	experimental		mature miRNA	standard	MIMAT0005586	hsa-miR-1231	hsa-miR-1231
952	hsa-miR-1233-3p	0.119696	4.40477	1	0.0117319	4.7876	1	0.012282	7.34515	1	0.0812547	3.78154	1	0.00123027	16.1023	1	0.0207647	10.063	1	0.000134303	12.8193	1	0.0207979	5.55774	1	UGAGCCCUGUCCUCCCGCAG	experimental		mature miRNA	standard	MIMAT0005588	hsa-miR-1233-3p	hsa-miR-1233-3p
953	hsa-miR-1233-5p	121.465	20.3925	2.97678e-14	107.602	23.9785	0.000920813	520.757	56.1358	9.80332e-18	492.093	44.5569	4.853e-29	173.315	39.989	7.63834e-05	361.574	35.6139	1.42757e-30	229.547	24.9735	2.56952e-31	336.494	29.2928	7.22347e-19	AGUGGGAGGCCAGGGCACGGCA	experimental		mature miRNA	standard	MIMAT0022943	hsa-miR-1233-5p	hsa-miR-1233-5p
954	hsa-miR-1234-3p	9.68406	6.01533	0.523173	4.08703	4.49043	0.644993	0.0130664	7.95723	1	8.10094	4.14291	0.353826	0.929391	19.5138	0.901854	0.0146103	8.56204	1	2.06598	16.311	0.252776	0.0163445	9.608	1	UCGGCCUGACCACCCACCCCAC	experimental		mature miRNA	standard	MIMAT0005589	hsa-miR-1234-3p	hsa-miR-1234-3p
955	hsa-miR-1236-3p	0.101611	7.41201	1	0.00805152	4.47615	1	0.00957336	5.78057	1	0.0528734	2.87765	1	0.290951	23.8298	0.956547	0.0150943	7.7938	1	0.214451	13.6327	0.723382	0.0164892	7.6567	1	CCUCUUCCCCUUGUCUCUCCAG	experimental		mature miRNA	standard	MIMAT0005591	hsa-miR-1236-3p	hsa-miR-1236-3p
956	hsa-miR-1236-5p	0.113438	4.94139	1	0.0125965	5.10637	1	0.0130171	4.04564	1	0.676549	4.07664	0.978023	0.00135197	14.5212	1	0.0207727	13.7344	1	0.000147824	14.9542	1	0.0212681	7.91955	1	UGAGUGACAGGGGAAAUGGGGA	experimental		mature miRNA	standard	MIMAT0022945	hsa-miR-1236-5p	hsa-miR-1236-5p
957	hsa-miR-1237-3p	31.3629	35.027	0.603743	0.0124717	6.04828	1	7.43802	8.2513	0.617139	0.822534	2.94427	0.949246	2.6087	12.1408	0.630012	0.0213406	10.7501	1	0.000219354	12.3459	1	0.0237458	5.88288	1	UCCUUCUGCUCCGUCCCCCAG	experimental		mature miRNA	standard	MIMAT0005592	hsa-miR-1237-3p	hsa-miR-1237-3p
958	hsa-miR-1237-5p	460.014	34.7179	3.75225e-47	70.1727	13.776	0.000929929	595.959	58.7686	2.41872e-21	410.646	34.8194	4.55293e-33	122.264	45.9555	0.0156348	460.05	41.4358	1.0558e-34	306.73	26.4059	1.81941e-45	201.148	46.6005	0.00219572	CGGGGGCGGGGCCGAAGCGCG	experimental		mature miRNA	standard	MIMAT0022946	hsa-miR-1237-5p	hsa-miR-1237-5p
959	hsa-miR-1238-3p	103.873	18.0425	7.76717e-06	0.0108039	5.48428	1	0.0144877	3.32639	1	19.2567	5.33036	0.106017	2.1045	23.22	0.840162	0.0184913	6.8982	1	0.497633	16.5479	0.751105	0.0246114	5.71296	1	CUUCCUCGUCUGUCUGCCCC	experimental		mature miRNA	standard	MIMAT0005593	hsa-miR-1238-3p	hsa-miR-1238-3p
960	hsa-miR-1238-5p	0.058737	4.84169	1	6.13311	4.56278	0.771653	22.3665	9.60801	0.123404	11.4632	3.84617	0.10913	0.00199866	22.6774	1	15.4764	11.4132	0.109337	0.442691	23.3777	0.913779	0.0176158	5.73205	1	GUGAGUGGGAGCCCCAGUGUGUG	experimental		mature miRNA	standard	MIMAT0022947	hsa-miR-1238-5p	hsa-miR-1238-5p
961	hsa-miR-1243	0.085454	4.35148	1	0.0101941	4.19034	1	4.27814	6.6919	0.633522	0.0542384	2.42805	1	2.2531	16.8843	0.688577	0.0174126	6.97721	1	0.000168799	13.7683	1	0.016552	6.76253	1	AACUGGAUCAAUUAUAGGAGUG	experimental		mature miRNA	standard	MIMAT0005894	hsa-miR-1243	hsa-miR-1243
962	hsa-miR-1244	28.9237	11.6917	0.00274163	14.2915	5.92877	0.441735	31.0449	12.3819	0.122685	72.4769	9.35416	1.09138e-12	24.4929	16.4018	0.126445	30.4703	17.5698	0.0258916	3.76075	15.2373	0.350702	3.06445	8.08786	0.830161	AAGUAGUUGGUUUGUAUGAGAUGGUU	experimental		mature miRNA	standard	MIMAT0005896	hsa-miR-1244	hsa-miR-1244
963	hsa-miR-1245a	0.101884	5.26539	1	0.010545	3.44242	1	0.0112829	8.47857	1	0.061889	1.9274	1	3.31622	12.8256	0.433638	0.0180793	9.41452	1	0.000143561	12.9864	1	0.016146	5.61779	1	AAGUGAUCUAAAGGCCUACAU	experimental		mature miRNA	standard	MIMAT0005897	hsa-miR-1245a	hsa-miR-1245a
964	hsa-miR-1245b-3p	0.11256	5.47526	1	0.0127268	5.0885	1	0.013127	5.5775	1	0.919265	1.7977	0.929225	0.00137055	9.06377	1	0.0207739	6.57045	1	0.000149889	10.4467	1	0.021337	7.72233	1	UCAGAUGAUCUAAAGGCCUAUA	experimental		mature miRNA	standard	MIMAT0019951	hsa-miR-1245b-3p	hsa-miR-1245b-3p
965	hsa-miR-1245b-5p	0.0921458	4.39901	1	0.00772779	5.98201	1	5.62313	6.19069	0.435848	0.0515637	2.42498	1	0.00120502	13.1304	1	0.0150135	7.28898	1	1.44065	83.2247	0.831637	0.0196508	5.17514	1	UAGGCCUUUAGAUCACUUAAA	experimental		mature miRNA	standard	MIMAT0019950	hsa-miR-1245b-5p	hsa-miR-1245b-5p
966	hsa-miR-1246	1250.95	41.4702	2.30671e-212	220.361	36.2022	2.17797e-09	1559.62	64.2707	3.23882e-123	4069.4	51.8706	0	485.313	68.2584	2.95356e-13	4553.09	160.749	4.21439e-180	2409.02	75.6747	4.75909e-237	7225.02	330.297	1.63326e-101	AAUGGAUUUUUGGAGCAGG	experimental		mature miRNA	standard	MIMAT0005898	hsa-miR-1246	hsa-miR-1246
967	hsa-miR-1247-3p	0.0618476	6.07053	1	0.0109541	4.86438	1	10.8961	12.4234	0.438958	0.0452617	2.74511	1	0.00156536	20.4095	1	0.0127711	7.76216	1	2.8004	14.8981	0.0541583	34.9708	43.6041	0.618182	CCCCGGGAACGUCGAGACUGGAGC	experimental		mature miRNA	standard	MIMAT0022721	hsa-miR-1247-3p	hsa-miR-1247-3p
968	hsa-miR-1247-5p	0.0569197	10.6614	1	4.5855	15.801	0.965764	33.7889	38.134	0.566016	3.80536	2.48571	0.481275	7.64742	12.4933	0.262866	1.96236	9.53407	0.843602	0.000337335	17.0852	1	0.0138661	3.84506	1	ACCCGUCCCGUUCGUCCCCGGA	experimental		mature miRNA	standard	MIMAT0005899	hsa-miR-1247-5p	hsa-miR-1247-5p
969	hsa-miR-1248	132.47	21.8082	2.46295e-11	0.0217223	4.99996	1	5.28867	6.08216	0.67327	8.01438	3.36942	0.393609	8.37731	20.1566	0.601009	19.8625	9.30668	0.0729837	0.000351913	10.857	1	8.36087	8.22583	0.712509	ACCUUCUUGUAUAAGCACUGUGCUAAA	experimental		mature miRNA	standard	MIMAT0005900	hsa-miR-1248	hsa-miR-1248
970	hsa-miR-1249	185.377	33.3949	3.73139e-08	0.0159697	4.62098	1	2.62705	6.42014	0.844708	12.2293	4.59742	0.325738	16.372	21.2893	0.292846	6.24479	6.98075	0.539942	0.000315419	10.6874	1	0.0283983	4.00359	1	ACGCCCUUCCCCCCCUUCUUCA	experimental		mature miRNA	standard	MIMAT0005901	hsa-miR-1249	hsa-miR-1249
971	hsa-miR-1250-3p	0.101734	6.03046	1	0.0105347	3.38128	1	0.0112741	6.32805	1	0.0617348	2.68383	1	3.56504	20.5872	0.603971	0.0180564	10.5465	1	0.000143649	15.9612	1	0.0161086	6.81578	1	ACAUUUUCCAGCCCAUUCA	experimental		mature miRNA	standard	MIMAT0026740	hsa-miR-1250-3p	hsa-miR-1250-3p
972	hsa-miR-1250-5p	0.0883774	4.47078	1	44.5169	71.7919	0.719022	0.0146571	5.95667	1	3.29347	4.15587	0.823196	0.00175008	13.6058	1	0.77044	7.88441	0.993377	0.000258243	9.35351	1	0.0157005	9.64753	1	ACGGUGCUGGAUGUGGCCUUU	experimental		mature miRNA	standard	MIMAT0005902	hsa-miR-1250-5p	hsa-miR-1250-5p
973	hsa-miR-1251-3p	0.0947514	7.13046	1	0.0111551	3.51766	1	22.0563	35.0915	0.663755	0.0674468	2.43941	1	0.0013335	16.3419	1	0.0196058	6.92253	1	0.000165576	24.5583	1	0.0210729	4.51003	1	CGCUUUGCUCAGCCAGUGUAG	experimental		mature miRNA	standard	MIMAT0026741	hsa-miR-1251-3p	hsa-miR-1251-3p
974	hsa-miR-1251-5p	0.119696	7.94377	1	0.0117319	2.54971	1	0.012282	4.10283	1	0.0812547	2.56626	1	0.00123027	16.9975	1	0.0207647	10.3845	1	0.000134303	16.5893	1	0.0207979	6.42346	1	ACUCUAGCUGCCAAAGGCGCU	experimental		mature miRNA	standard	MIMAT0005903	hsa-miR-1251-5p	hsa-miR-1251-5p
975	hsa-miR-1252-3p	1121.09	2161.56	0.613958	199.156	25.4056	6.99111e-10	0.0185609	7.51797	1	0.0769759	2.84812	1	0.00191798	22.7436	1	0.022976	12.9284	1	0.000247001	20.1842	1	0.0217521	6.18061	1	CAAAUGAGCUUAAUUUCCUUUU	experimental		mature miRNA	standard	MIMAT0026744	hsa-miR-1252-3p	hsa-miR-1252-3p
976	hsa-miR-1252-5p	0.0935548	6.19237	1	0.0111246	5.5099	1	33.1519	55.5846	0.675541	0.0667671	2.66024	1	0.00133936	18.2076	1	0.0195447	7.09486	1	0.000167471	10.5279	1	0.0210879	8.78931	1	AGAAGGAAAUUGAAUUCAUUUA	experimental		mature miRNA	standard	MIMAT0005944	hsa-miR-1252-5p	hsa-miR-1252-5p
977	hsa-miR-1253	0.0840791	6.51861	1	17.9692	7.44409	0.0927745	4.24647	11.4693	0.795593	0.0480223	3.25738	1	0.147952	15.2724	0.969122	0.0155598	8.19326	1	0.00022332	16.7978	1	0.0126727	7.4081	1	AGAGAAGAAGAUCAGCCUGCA	experimental		mature miRNA	standard	MIMAT0005904	hsa-miR-1253	hsa-miR-1253
978	hsa-miR-1254	0.119696	6.60217	1	0.0117319	3.9723	1	0.012282	7.0689	1	0.0812547	3.15755	1	0.00123027	13.9288	1	0.0207647	9.48687	1	0.000134303	15.7379	1	0.0207979	9.58284	1	AGCCUGGAAGCUGGAGCCUGCAGU	experimental		mature miRNA	standard	MIMAT0005905	hsa-miR-1254	hsa-miR-1254
979	hsa-miR-1255a	0.0736512	5.53418	1	0.00631554	2.55559	1	93.2677	115.327	0.448307	0.0363164	2.29567	1	0.33058	15.5433	0.929203	0.012304	11.1332	1	21.8174	19.727	5.56732e-09	0.016188	5.11553	1	AGGAUGAGCAAAGAAAGUAGAUU	experimental		mature miRNA	standard	MIMAT0005906	hsa-miR-1255a	hsa-miR-1255a
980	hsa-miR-1255b-2-3p	0.0918551	8.67317	1	0.0150794	4.3841	1	0.0141788	3.61792	1	3.70017	3.9958	0.837394	0.00163622	15.9467	1	3.87863	16.1991	0.864914	0.000195227	16.152	1	0.0235965	7.80183	1	AACCACUUUCUUUGCUCAUCCA	experimental		mature miRNA	standard	MIMAT0022725	hsa-miR-1255b-2-3p	hsa-miR-1255b-2-3p
981	hsa-miR-1255b-5p	0.084669	4.32301	1	0.0101599	4.13149	1	5.20355	4.91045	0.430307	0.0536935	2.71579	1	2.6248	16.3138	0.633292	0.0173404	12.8571	1	0.000169949	15.9331	1	0.016478	7.37506	1	CGGAUGAGCAAAGAAAGUGGUU	experimental		mature miRNA	standard	MIMAT0005945	hsa-miR-1255b-5p	hsa-miR-1255b-5p
982	hsa-miR-1256	0.0839512	4.2894	1	157.286	27.0093	2.08357e-06	49.494	56.9855	0.554898	0.0498545	3.1028	1	0.00150317	14.4128	1	0.0158199	9.34241	1	0.000250558	22.2512	1	0.0133308	6.50745	1	AGGCAUUGACUUCUCACUAGCU	experimental		mature miRNA	standard	MIMAT0005907	hsa-miR-1256	hsa-miR-1256
983	hsa-miR-1257	0.0655624	7.97322	1	0.011203	10.6522	1	100.16	108.689	0.471076	0.0491073	3.31327	1	3.34815	31.9688	0.790249	2.6977	8.27933	0.779988	0.000224196	15.9948	1	0.0179424	6.24898	1	AGUGAAUGAUGGGUUCUGACC	experimental		mature miRNA	standard	MIMAT0005908	hsa-miR-1257	hsa-miR-1257
984	hsa-miR-1258	0.0980873	3.83365	1	0.0112387	3.92808	1	7.27297	5.88004	0.395695	0.0693326	2.51452	1	0.00131769	14.9358	1	0.0197733	8.59172	1	0.000160523	20.0854	1	0.0210319	9.07841	1	AGUUAGGAUUAGGUCGUGGAA	experimental		mature miRNA	standard	MIMAT0005909	hsa-miR-1258	hsa-miR-1258
985	hsa-miR-1260a	12.2058	5.43538	0.00724484	162.86	24.8056	6.73571e-05	51.5113	11.6148	0.0155851	137.244	21.0899	6.4819e-09	84.2752	59.095	0.211808	50.0801	17.9058	0.00186988	0.000646939	9.97131	1	23.3197	7.63122	0.0570157	AUCCCACCUCUGCCACCA	experimental		mature miRNA	standard	MIMAT0005911	hsa-miR-1260a	hsa-miR-1260a
986	hsa-miR-1260b	172.97	30.7334	1.35578e-11	2104.78	151.902	2.88938e-43	684.159	52.3372	1.76256e-34	1001.32	46.28	2.22377e-104	1049.98	75.6641	3.19449e-43	453.924	37.3463	4.04192e-40	438.571	34.1917	2.22642e-46	565.341	51.0263	3.26599e-18	AUCCCACCACUGCCACCAU	experimental		mature miRNA	standard	MIMAT0015041	hsa-miR-1260b	hsa-miR-1260b
987	hsa-miR-1261	0.0820414	6.35567	1	0.013543	3.80394	1	0.0131624	5.1805	1	3.63089	2.85132	0.715512	1.45542	19.8553	0.843538	1.30269	9.47396	0.918821	0.000201125	8.35874	1	0.0187158	4.36898	1	AUGGAUAAGGCUUUGGCUU	experimental		mature miRNA	standard	MIMAT0005913	hsa-miR-1261	hsa-miR-1261
988	hsa-miR-1262	0.0576595	3.93503	1	0.0139924	5.11939	1	3.91052	5.76054	0.668213	12.1891	3.1824	0.0683913	28.8506	14.8647	0.00367197	15.277	9.96946	0.13358	0.000284213	13.0688	1	0.0182956	4.44196	1	AUGGGUGAAUUUGUAGAAGGAU	experimental		mature miRNA	standard	MIMAT0005914	hsa-miR-1262	hsa-miR-1262
989	hsa-miR-1263	0.0744524	5.18341	1	0.0137438	6.1934	1	0.0131411	6.09454	1	5.47697	2.76385	0.503276	14.3283	16.2683	0.102589	4.2226	7.37055	0.628621	0.000219571	18.6796	1	0.0178634	5.89753	1	AUGGUACCCUGGCAUACUGAGU	experimental		mature miRNA	standard	MIMAT0005915	hsa-miR-1263	hsa-miR-1263
990	hsa-miR-1264	0.0827153	5.49318	1	0.0120044	5.53827	1	0.0116918	11.1763	1	0.0592816	2.5541	1	8.38246	15.934	0.216359	7.15896	9.66291	0.517257	0.000181906	8.31275	1	0.0173668	4.58651	1	CAAGUCUUAUUUGAGCACCUGUU	experimental		mature miRNA	standard	MIMAT0005791	hsa-miR-1264	hsa-miR-1264
991	hsa-miR-1265	0.0831383	4.69012	1	0.0123921	5.47862	1	0.0119055	6.7418	1	0.0617894	3.65812	1	2.43466	17.2912	0.693143	13.8269	11.6038	0.283992	0.000184445	15.9988	1	0.0182667	5.7609	1	CAGGAUGUGGUCAAGUGUUGUU	experimental		mature miRNA	standard	MIMAT0005918	hsa-miR-1265	hsa-miR-1265
992	hsa-miR-1266-3p	0.0714401	5.56145	1	7.88643	4.07406	0.0725841	0.00907539	4.35316	1	0.0337343	4.5616	1	5.91706	17.57	0.391667	4.93337	8.69411	0.425599	19.8506	20.5509	3.63205e-06	0.011576	7.21245	1	CCCUGUUCUAUGCCCUGAGGGA	experimental		mature miRNA	standard	MIMAT0026742	hsa-miR-1266-3p	hsa-miR-1266-3p
993	hsa-miR-1266-5p	0.0649117	5.43551	1	2.24371	3.4242	0.501118	1.98114	5.62793	0.740475	0.0317703	4.51712	1	2.49191	21.5349	0.741513	1.38133	5.27061	0.735356	18.1232	17.675	6.35866e-07	0.0124872	5.80583	1	CCUCAGGGCUGUAGAACAGGGCU	experimental		mature miRNA	standard	MIMAT0005920	hsa-miR-1266-5p	hsa-miR-1266-5p
994	hsa-miR-1267	0.0645827	4.22285	1	5.70216	4.78161	0.344841	0.0105256	6.03112	1	3.9517	5.76016	0.709625	1.62697	15.5099	0.789232	9.12777	10.0178	0.205826	22.7393	11.3297	2.01327e-16	0.013218	7.28056	1	CCUGUUGAAGUGUAAUCCCCA	experimental		mature miRNA	standard	MIMAT0005921	hsa-miR-1267	hsa-miR-1267
995	hsa-miR-1268a	62.3169	19.0349	1.38296e-05	40.4793	7.04847	0.000692292	43.7479	10.725	0.00515519	43.0655	12.9153	0.00131062	44.0093	21.2172	0.040396	52.1392	20.2555	0.000480679	89.2854	16.862	5.20527e-20	27.8681	10.7634	0.109649	CGGGCGUGGUGGUGGGGG	experimental		mature miRNA	standard	MIMAT0005922	hsa-miR-1268a	hsa-miR-1268a
996	hsa-miR-1268b	275.601	26.8687	1.25639e-31	82.6537	13.8313	4.18559e-05	373.459	42.9533	4.42711e-15	240.73	29.1765	3.80772e-17	75.2285	20.6183	0.00103056	205.461	22.5093	2.85545e-28	262.824	43.3792	2.41309e-14	319.734	40.5597	1.20512e-09	CGGGCGUGGUGGUGGGGGUG	experimental		mature miRNA	standard	MIMAT0018925	hsa-miR-1268b	hsa-miR-1268b
997	hsa-miR-1269a	0.0605441	5.00095	1	1.52365	3.66759	0.671596	1.39196	6.8086	0.845606	0.0308442	2.90789	1	10.5407	15.0287	0.118831	7.99012	7.5825	0.127779	17.622	16.663	4.56093e-07	0.0125329	5.4177	1	CUGGACUGAGCCGUGCUACUGG	experimental		mature miRNA	standard	MIMAT0005923	hsa-miR-1269a	hsa-miR-1269a
998	hsa-miR-1269b	0.0556248	4.93999	1	2.47844	4.20707	0.531451	4.75996	6.55562	0.492182	0.0264347	3.74419	1	209.637	45.406	8.43356e-09	3.63559	7.49444	0.465739	21.7984	19.6405	3.5598e-06	0.0109662	7.37398	1	CUGGACUGAGCCAUGCUACUGG	experimental		mature miRNA	standard	MIMAT0019059	hsa-miR-1269b	hsa-miR-1269b
999	hsa-miR-1270	0.0572344	7.87286	1	4.29309	5.44078	0.531131	0.0088181	5.23065	1	0.03178	4.30078	1	15.4007	38.6489	0.438238	4.46887	8.28886	0.415024	21.1327	22.5921	1.55144e-05	0.85484	4.73437	0.870935	CUGGAGAUAUGGAAGAGCUGUGU	experimental		mature miRNA	standard	MIMAT0005924	hsa-miR-1270	hsa-miR-1270
1000	hsa-miR-1271-3p	0.0848723	9.4631	1	4.42659	3.95728	0.338533	0.00991097	3.46147	1	0.045957	2.75236	1	0.00135985	16.0435	1	6.93439	16.2572	0.604535	17.8583	19.9964	2.72492e-06	0.0157013	5.73978	1	AGUGCCUGCUAUGUGCCAGGCA	experimental		mature miRNA	standard	MIMAT0022712	hsa-miR-1271-3p	hsa-miR-1271-3p
1001	hsa-miR-1271-5p	57.6454	8.36719	4.9612e-09	32.8585	9.10384	0.00313264	6.41233	7.66424	0.599551	15.0816	6.85487	0.109925	4.69976	18.8802	0.655695	0.0129025	6.87285	1	34.0551	20.0098	8.50031e-08	0.0157728	8.50487	1	CUUGGCACCUAGCAAGCACUCA	experimental		mature miRNA	standard	MIMAT0005796	hsa-miR-1271-5p	hsa-miR-1271-5p
1002	hsa-miR-1272	0.0875578	6.30991	1	6.76563	3.3345	0.082938	0.00990897	5.36964	1	0.0457986	2.98786	1	0.00133803	23.0787	1	2.37898	8.38192	0.746805	14.1554	20.4758	5.55015e-05	0.0151296	7.60483	1	GAUGAUGAUGGCAGCAAAUUCUGAAA	experimental		mature miRNA	standard	MIMAT0005925	hsa-miR-1272	hsa-miR-1272
1003	hsa-miR-1273a	6.53799	2.28815	0.171276	10.5294	4.11109	0.0841877	0.0141887	6.33061	1	208.689	32.8581	3.83097e-09	0.488249	15.144	0.941706	2.35725	6.30253	0.689796	24.3447	19.0846	6.26937e-06	0.0178053	5.78194	1	GGGCGACAAAGCAAGACUCUUUCUU	experimental		mature miRNA	standard	MIMAT0005926	hsa-miR-1273a	hsa-miR-1273a
1004	hsa-miR-1273c	6.61589	4.99087	0.325905	5.12529	6.12593	0.58153	3.49496	7.5305	0.754999	20.938	6.60904	0.00935453	33.4332	61.3735	0.501517	1.13047	8.15119	0.867611	35.09	13.1237	4.73105e-15	0.572016	9.16004	0.967684	GGCGACAAAACGAGACCCUGUC	experimental		mature miRNA	standard	MIMAT0015017	hsa-miR-1273c	hsa-miR-1273c
1005	hsa-miR-1273d	3.31627	5.57401	0.873726	11.7182	5.87944	0.0580105	0.0102318	5.52414	1	0.0390891	3.40321	1	1.438	24.0189	0.852331	0.0126078	11.129	1	14.6899	17.6029	1.11555e-06	0.0130938	6.84692	1	GAACCCAUGAGGUUGAGGCUGCAGU	experimental		mature miRNA	standard	MIMAT0015090	hsa-miR-1273d	hsa-miR-1273d
1006	hsa-miR-1273e	12.6232	3.637	0.111755	19.3081	4.98137	0.0084397	0.0140095	5.94888	1	10.3076	4.12766	0.261667	0.00203441	17.5389	1	1.7337	11.5545	0.887117	22.2702	19.9993	8.09329e-06	0.0202099	4.71808	1	UUGCUUGAACCCAGGAAGUGGA	experimental		mature miRNA	standard	MIMAT0018079	hsa-miR-1273e	hsa-miR-1273e
1007	hsa-miR-1273f	21.8108	6.24572	0.0022529	34.2518	7.71409	0.00118481	5.07884	8.22374	0.706713	20.1565	5.2491	0.00219496	20.7971	15.068	0.0719587	13.2077	9.1221	0.0649023	26.0982	10.8386	6.50273e-13	0.0164861	11.9861	1	GGAGAUGGAGGUUGCAGUG	experimental		mature miRNA	standard	MIMAT0020601	hsa-miR-1273f	hsa-miR-1273f
1008	hsa-miR-1273g-3p	6853.48	127.243	0	2305.35	99.0159	1.16716e-120	8833.54	279.378	1.4339e-217	9728.09	142.824	0	1593.06	215.199	4.78969e-14	4494.64	101.012	0	4262.24	111.918	0	4254.43	199.891	4.32015e-92	ACCACUGCACUCCAGCCUGAG	experimental		mature miRNA	standard	MIMAT0022742	hsa-miR-1273g-3p	hsa-miR-1273g-3p
1009	hsa-miR-1273g-5p	36.1729	25.0227	0.431162	2.73429	3.16052	0.39831	0.0111199	7.74006	1	0.0420623	4.56963	1	5.31156	37.0349	0.727528	0.013969	8.01363	1	10.4012	18.8694	0.000257589	0.0154635	5.6872	1	GGUGGUUGAGGCUGCAGUAAGU	experimental		mature miRNA	standard	MIMAT0020602	hsa-miR-1273g-5p	hsa-miR-1273g-5p
1010	hsa-miR-1273h-3p	11.3544	9.57225	0.489251	11.8648	5.2635	0.0516598	5.95738	5.81038	0.447279	0.0340686	4.07678	1	2.87267	14.666	0.653392	3.26587	8.46251	0.649675	19.5675	15.2613	1.11018e-07	0.0157117	5.62744	1	CUGCAGACUCGACCUCCCAGGC	experimental		mature miRNA	standard	MIMAT0030416	hsa-miR-1273h-3p	hsa-miR-1273h-3p
1011	hsa-miR-1273h-5p	0.0770048	3.45372	1	0.877835	3.26553	0.753494	2.79357	18.151	0.883808	0.0340676	4.85865	1	1.0577	18.4625	0.840575	0.0114737	14.2627	1	9.16121	12.1855	1.03862e-07	0.0123593	10.1744	1	CUGGGAGGUCAAGGCUGCAGU	experimental		mature miRNA	standard	MIMAT0030415	hsa-miR-1273h-5p	hsa-miR-1273h-5p
1012	hsa-miR-1275	2140.29	48.145	0	129.606	31.0168	0.000329311	1893.1	82.7796	9.16208e-111	1481.9	63.549	1.52084e-121	430.693	87.8614	7.80421e-07	2978.61	430.12	1.86517e-12	1144.61	69.2001	3.70744e-67	1828.55	150.949	3.46328e-29	GUGGGGGAGAGGCUGUC	experimental		mature miRNA	standard	MIMAT0005929	hsa-miR-1275	hsa-miR-1275
1013	hsa-miR-1276	0.0745172	4.99382	1	2.51843	2.64257	0.35089	0.00907056	5.02375	1	0.0352359	3.15665	1	9.18241	57.9112	0.701138	1.70927	9.02365	0.810893	8.96513	9.25984	6.21074e-11	0.0118915	3.75295	1	UAAAGAGCCCUGUGGAGACA	experimental		mature miRNA	standard	MIMAT0005930	hsa-miR-1276	hsa-miR-1276
1014	hsa-miR-1277-3p	0.10628	3.7922	1	0.508618	2.82329	0.846648	0.00945578	6.53829	1	0.0502173	4.73591	1	0.0011612	18.9169	1	0.0136032	8.39964	1	8.91415	20.4841	0.000319751	0.0156552	4.13566	1	UACGUAGAUAUAUAUGUAUUUU	experimental		mature miRNA	standard	MIMAT0005933	hsa-miR-1277-3p	hsa-miR-1277-3p
1015	hsa-miR-1277-5p	0.0647062	4.84726	1	0.0106747	2.87719	1	5.35142	5.08565	0.456475	101.204	20.6362	0.000101661	0.00185878	15.7859	1	2.11243	9.30114	0.821955	8.45082	9.19316	2.47281e-08	0.0228849	5.95495	1	AAAUAUAUAUAUAUAUGUACGUAU	experimental		mature miRNA	standard	MIMAT0022724	hsa-miR-1277-5p	hsa-miR-1277-5p
1016	hsa-miR-1278	389.778	52.5676	1.98978e-13	0.00952084	3.64878	0.997975	4.38029	4.7495	0.539965	0.0552862	4.12915	1	0.0336205	10.3629	0.990024	5.71559	11.8663	0.685646	8.25251	14.236	0.000161861	0.0311113	4.48615	1	UAGUACUGUGCAUAUCAUCUAU	experimental		mature miRNA	standard	MIMAT0005936	hsa-miR-1278	hsa-miR-1278
1017	hsa-miR-1279	0.0400116	6.23274	1	0.9273	3.18688	0.851727	1.10309	8.4334	0.913212	10.4863	4.71983	0.0894901	14.6554	28.7451	0.449735	5.3789	9.09045	0.367364	13.9393	11.2555	4.83739e-08	6.36546	8.08926	0.540179	UCAUAUUGCUUCUUUCU	experimental		mature miRNA	standard	MIMAT0005937	hsa-miR-1279	hsa-miR-1279
1018	hsa-miR-1281	22.4698	14.6357	0.0801529	81.2179	54.6392	0.308417	13.8719	7.74238	0.281043	25.3977	7.79806	0.00541633	7.89935	17.1279	0.570472	27.3162	13.3154	0.00447067	37.5067	15.3095	1.6054e-09	2.20771	5.13136	0.789172	UCGCCUCCUCCUCUCCC	experimental		mature miRNA	standard	MIMAT0005939	hsa-miR-1281	hsa-miR-1281
1019	hsa-miR-1282	23.3742	20.2043	0.556763	4.83244	2.38191	0.097866	0.71577	7.62792	0.946578	0.0496717	4.2834	1	0.0016472	18.4726	1	0.418088	12.4705	0.978069	7.98972	15.448	0.00082458	0.0206157	4.64735	1	UCGUUUGCCUUUUUCUGCUU	experimental		mature miRNA	standard	MIMAT0005940	hsa-miR-1282	hsa-miR-1282
1020	hsa-miR-1283	10.3932	5.54173	0.488279	0.00767597	2.37575	1	0.51616	6.47529	0.947405	0.0493601	2.70901	1	0.387975	17.391	0.935017	0.0158244	7.99547	1	4.04928	12.8297	0.00139691	0.0210601	4.74777	1	UCUACAAAGGAAAGCGCUUUCU	experimental		mature miRNA	standard	MIMAT0005799	hsa-miR-1283	hsa-miR-1283
1021	hsa-miR-1284	33.6806	38.9005	0.525978	4.20084	3.20984	0.483065	0.0137524	7.43041	1	2.18258	3.12769	0.821832	0.0023147	14.0206	1	0.214677	9.0898	0.984553	7.53005	13.2213	0.0004273	11.1481	7.84303	0.472559	UCUAUACAGACCCUGGCUUUUC	experimental		mature miRNA	standard	MIMAT0005941	hsa-miR-1284	hsa-miR-1284
1022	hsa-miR-1285-3p	13.263	6.525	0.373022	16.6251	5.3878	0.0166587	0.0128834	8.10191	1	6.4674	5.30361	0.555096	0.500488	15.552	0.92871	0.0138638	11.062	1	8.90347	10.9746	1.27794e-06	0.0156377	6.6823	1	UCUGGGCAACAAAGUGAGACCU	experimental		mature miRNA	standard	MIMAT0005876	hsa-miR-1285-3p	hsa-miR-1285-3p
1023	hsa-miR-1285-5p	9.68663	8.82389	0.44702	14.9407	4.53687	0.0459836	0.0128231	10.855	1	7.72969	4.59053	0.304189	28.7505	39.3869	0.349714	3.09766	11.8994	0.748701	14.4446	14.8885	3.85451e-05	1.06024	7.49977	0.92401	GAUCUCACUUUGUUGCCCAGG	experimental		mature miRNA	standard	MIMAT0022719	hsa-miR-1285-5p	hsa-miR-1285-5p
1024	hsa-miR-1286	9.8346	8.82784	0.663023	3.45743	3.80101	0.482204	0.512405	4.85522	0.943516	6.18853	3.09725	0.413308	0.00182476	14.3385	1	0.0153013	10.2556	1	7.63118	9.90825	9.1816e-07	0.0199818	10.0806	1	UGCAGGACCAAGAUGAGCCCU	experimental		mature miRNA	standard	MIMAT0005877	hsa-miR-1286	hsa-miR-1286
1025	hsa-miR-1287-3p	0.221588	3.73097	0.994046	0.00772973	3.70219	1	1.05111	11.6685	0.936618	0.0537451	2.66182	1	0.0012115	13.5446	1	0.0153331	8.84692	1	2.70261	10.8387	0.00214599	0.0204032	8.09104	1	CUCUAGCCACAGAUGCAGUGAU	experimental		mature miRNA	standard	MIMAT0026738	hsa-miR-1287-3p	hsa-miR-1287-3p
1026	hsa-miR-1287-5p	27.1088	15.5269	0.339476	2.59969	4.68832	0.64181	0.0126239	6.78283	1	2.89529	5.43846	0.823463	4.33561	19.5554	0.633577	0.0143228	10.8818	1	6.53671	15.2863	0.00321671	0.0164387	6.74697	1	UGCUGGAUCAGUGGUUCGAGUC	experimental		mature miRNA	standard	MIMAT0005878	hsa-miR-1287-5p	hsa-miR-1287-5p
1027	hsa-miR-1288-3p	8.05572	9.45339	0.776919	0.00803806	2.36549	1	8.72954	17.0836	0.704575	0.0552879	3.31577	1	0.00140679	14.0379	1	0.0168645	14.1449	1	4.78556	11.5215	8.17292e-05	0.024939	4.56894	1	UGGACUGCCCUGAUCUGGAGA	experimental		mature miRNA	standard	MIMAT0005942	hsa-miR-1288-3p	hsa-miR-1288-3p
1028	hsa-miR-1288-5p	1.19271	3.8845	0.950027	0.0084912	4.39777	1	0.01085	9.04654	1	1.64044	3.19576	0.868424	0.703815	16.3307	0.887373	0.0150891	14.5229	1	3.3583	10.8181	0.000946376	0.0189319	4.37067	1	GCAGAUCAGGACUGUAACUCACC	experimental		mature miRNA	standard	MIMAT0026743	hsa-miR-1288-5p	hsa-miR-1288-5p
1029	hsa-miR-1289	0.870515	5.33107	0.97764	0.00756523	4.50676	1	0.00975138	4.5871	1	0.0499411	2.8207	1	1.05785	11.6602	0.744293	0.0149109	9.64476	1	1.91677	17.7871	0.13554	0.0175882	6.14767	1	UGGAGUCCAGGAAUCUGCAUUUU	experimental		mature miRNA	standard	MIMAT0005879	hsa-miR-1289	hsa-miR-1289
1030	hsa-miR-1290	0.0691185	4.75661	1	0.497858	2.42848	0.854661	0.0104455	5.95147	1	4.25939	4.8159	0.65016	10.6939	24.8124	0.378924	1.03719	10.8885	0.914086	3.83297	5.52298	3.11317e-08	0.0136137	5.85584	1	UGGAUUUUUGGAUCAGGGA	experimental		mature miRNA	standard	MIMAT0005880	hsa-miR-1290	hsa-miR-1290
1031	hsa-miR-1291	41.3024	26.2796	0.38083	0.448932	3.94737	0.906649	0.0113251	9.19608	1	0.0456385	3.38322	1	6.73513	29.5056	0.590707	0.0149817	10.4791	1	3.57497	12.409	0.00533379	0.016994	7.84223	1	UGGCCCUGACUGAAGACCAGCAGU	experimental		mature miRNA	standard	MIMAT0005881	hsa-miR-1291	hsa-miR-1291
1032	hsa-miR-1292-3p	13.4164	7.37121	0.239824	1.65873	2.21072	0.536242	6.67486	7.66338	0.501763	0.0346565	4.33781	1	7.75138	17.0463	0.379123	0.0123819	5.89942	1	6.02046	13.6023	0.00207211	1.68815	8.61611	0.894292	UCGCGCCCCGGCUCCCGUUC	experimental		mature miRNA	standard	MIMAT0022948	hsa-miR-1292-3p	hsa-miR-1292-3p
1033	hsa-miR-1292-5p	43.1264	35.8725	0.431288	0.00749292	4.54401	1	4.31312	8.4449	0.697514	0.0440218	4.29701	1	7.88212	12.7578	0.162907	0.0155836	8.5741	1	4.57911	7.93257	2.08155e-07	0.0209441	10.0446	1	UGGGAACGGGUUCCGGCAGACGCUG	experimental		mature miRNA	standard	MIMAT0005943	hsa-miR-1292-5p	hsa-miR-1292-5p
1034	hsa-miR-1293	26.2749	30.9371	0.690089	1.29495	3.58316	0.728909	0.0114131	4.01493	1	0.0462491	4.2715	1	1.6622	12.0398	0.689826	0.0148788	11.0987	1	2.87124	15.1474	0.0559012	0.0165046	5.24245	1	UGGGUGGUCUGGAGAUUUGUGC	experimental		mature miRNA	standard	MIMAT0005883	hsa-miR-1293	hsa-miR-1293
1035	hsa-miR-1294	7.08968	16.6649	0.850546	0.0086814	3.73696	1	1.55462	3.59778	0.736942	0.0455599	3.15366	1	1.93573	14.2382	0.719496	4.57351	9.77538	0.646381	3.25403	10.5504	0.00592093	0.0220072	8.79127	1	UGUGAGGUUGGCAUUGUUGUCU	experimental		mature miRNA	standard	MIMAT0005884	hsa-miR-1294	hsa-miR-1294
1036	hsa-miR-1295a	0.0917453	4.9533	1	2.93126	3.66397	0.421677	0.00924729	7.10993	1	0.0396548	2.81382	1	1.17393	23.4068	0.85796	0.0121916	9.84978	1	1.95665	13.0097	0.0736934	0.0116726	6.99277	1	UUAGGCCGCAGAUCUGGGUGA	experimental		mature miRNA	standard	MIMAT0005885	hsa-miR-1295a	hsa-miR-1295a
1037	hsa-miR-1295b-3p	544.463	74.5701	1.33465e-13	0.0090115	3.04016	1	8.00547	10.9285	0.612623	0.0465444	5.40236	1	7.47963	17.9175	0.413781	3.65864	9.01483	0.723617	4.9073	15.7859	0.0235268	0.0267621	5.92194	1	AAUAGGCCACGGAUCUGGGCAA	experimental		mature miRNA	standard	MIMAT0022294	hsa-miR-1295b-3p	hsa-miR-1295b-3p
1038	hsa-miR-1295b-5p	0.112595	8.96539	1	0.00816203	3.04371	1	0.00977692	3.32666	1	0.060968	3.51686	1	0.00112853	17.3219	1	0.0159019	7.81051	1	0.903929	11.9954	0.178621	0.0194747	6.6474	1	CACCCAGAUCUGCGGCCUAAU	experimental		mature miRNA	standard	MIMAT0022293	hsa-miR-1295b-5p	hsa-miR-1295b-5p
1039	hsa-miR-1296-3p	657.135	103.808	8.42842e-10	0.0112847	4.70895	1	0.0138379	5.8085	1	0.0740683	2.34811	1	0.00171713	20.609	1	0.0204919	7.2343	1	0.844237	11.087	0.251973	0.537663	5.441	0.974116	GAGUGGGGCUUCGACCCUAACC	experimental		mature miRNA	standard	MIMAT0026637	hsa-miR-1296-3p	hsa-miR-1296-3p
1040	hsa-miR-1296-5p	53.5051	79.6726	0.59011	0.0114018	2.51747	1	0.0120003	6.70799	1	0.0508478	3.58639	1	9.08622	23.7053	0.473735	3.41909	16.1663	0.845711	1.23985	11.5682	0.21919	0.993722	5.17901	0.931252	UUAGGGCCCUGGCUCCAUCUCC	experimental		mature miRNA	standard	MIMAT0005794	hsa-miR-1296-5p	hsa-miR-1296-5p
1041	hsa-miR-1297	14.9281	16.1838	0.654547	0.00784783	4.85458	1	10.4994	9.65624	0.415295	0.0443043	2.84487	1	8.721	26.1438	0.454858	0.0157448	9.29723	1	0.764024	17.4826	0.554007	0.0200056	5.50332	1	UUCAAGUAAUUCAGGUG	experimental		mature miRNA	standard	MIMAT0005886	hsa-miR-1297	hsa-miR-1297
1042	hsa-miR-1298-3p	12.7449	17.4768	0.789074	0.00855461	3.34664	1	4.48946	6.63099	0.627809	0.059146	4.40568	1	0.00143456	17.1582	1	0.0178385	6.26297	1	1.43139	16.6387	0.263982	0.0257279	9.29164	1	CAUCUGGGCAACUGACUGAAC	experimental		mature miRNA	standard	MIMAT0026641	hsa-miR-1298-3p	hsa-miR-1298-3p
1043	hsa-miR-1298-5p	0.0968589	7.55614	1	0.00744868	3.82848	1	0.0090769	3.98033	1	0.0474965	2.45404	1	1.95881	13.4129	0.608262	0.0140482	11.1375	1	0.769227	16.0465	0.400017	0.0153603	7.29572	1	UUCAUUCGGCUGUCCAGAUGUA	experimental		mature miRNA	standard	MIMAT0005800	hsa-miR-1298-5p	hsa-miR-1298-5p
1044	hsa-miR-1299	6.42575	7.00007	0.596309	1.13292	3.06321	0.814781	0.0112955	6.96287	1	0.040134	4.10153	1	26.2225	14.4663	0.0070491	4.14817	5.68657	0.394308	1.07147	13.8371	0.433692	8.47957	11.2438	0.61482	UUCUGGAAUUCUGUGUGAGGGA	experimental		mature miRNA	standard	MIMAT0005887	hsa-miR-1299	hsa-miR-1299
1045	hsa-miR-1301-3p	28.378	26.2407	0.339475	9.68343	6.04014	0.274696	2.96246	12.264	0.883436	10.4597	6.50181	0.296859	20.3908	39.3863	0.486905	15.4864	15.5262	0.229777	7.17633	16.3882	0.0465595	0.0177769	6.38138	1	UUGCAGCUGCCUGGGAGUGACUUC	experimental		mature miRNA	standard	MIMAT0005797	hsa-miR-1301-3p	hsa-miR-1301-3p
1046	hsa-miR-1301-5p	0.0722724	6.1834	1	10.7675	9.6578	0.332565	0.00947173	9.06137	1	0.0353382	2.97171	1	5.84018	16.7694	0.381636	4.79996	13.2081	0.626117	3.98901	13.5012	0.0175524	0.0115761	6.9597	1	CGCUCUAGGCACCGCAGCA	experimental		mature miRNA	standard	MIMAT0026639	hsa-miR-1301-5p	hsa-miR-1301-5p
1047	hsa-miR-1302	48.9286	52.6004	0.524564	6.51365	3.18773	0.244463	0.0143311	7.507	1	2.27082	2.8307	0.810925	0.00211551	18.3032	1	0.0160761	9.88417	1	1.16712	15.4206	0.434723	1.88355	6.9563	0.89315	UUGGGACAUACUUAUGCUAAA	experimental		mature miRNA	standard	MIMAT0005890	hsa-miR-1302	hsa-miR-1302
1048	hsa-miR-1303	7.45596	16.7473	0.892638	0.00824511	3.90035	1	0.0108952	5.47794	1	0.0529764	2.87941	1	4.17973	21.6924	0.59784	0.0164137	11.9014	1	0.453529	15.8023	0.609218	0.0192197	9.19458	1	UUUAGAGACGGGGUCUUGCUCU	experimental		mature miRNA	standard	MIMAT0005891	hsa-miR-1303	hsa-miR-1303
1049	hsa-miR-1304-3p	12.8376	25.265	0.852453	0.00775788	5.10802	1	0.0106351	6.95435	1	0.0499476	4.5313	1	8.32559	12.8923	0.115113	0.0157884	13.2363	1	2.11397	13.2947	0.042927	0.0191789	6.33778	1	UCUCACUGUAGCCUCGAACCCC	experimental		mature miRNA	standard	MIMAT0022720	hsa-miR-1304-3p	hsa-miR-1304-3p
1050	hsa-miR-1304-5p	89.4197	69.9225	0.33732	0.00934147	5.32981	1	0.0129704	7.27474	1	3.19679	3.32569	0.739276	14.9708	17.1162	0.111584	0.0169957	7.02742	1	1.94291	9.82526	0.0318113	0.0222243	5.97204	1	UUUGAGGCUACAGUGAGAUGUG	experimental		mature miRNA	standard	MIMAT0005892	hsa-miR-1304-5p	hsa-miR-1304-5p
1051	hsa-miR-1305	11.8624	14.2202	0.731413	0.0129788	3.57788	1	0.0141147	5.49113	1	0.0661537	2.45897	1	15.6725	15.227	0.0561963	5.2681	9.35556	0.683672	0.00020156	14.056	1	0.0222892	7.61626	1	UUUUCAACUCUAAUGGGAGAGA	experimental		mature miRNA	standard	MIMAT0005893	hsa-miR-1305	hsa-miR-1305
1052	hsa-miR-1306-3p	0.089911	5.24122	1	0.0124384	3.24176	1	0.0129135	7.19931	1	8.5252	5.03164	0.554155	4.1708	16.5671	0.539181	0.0180923	8.55009	1	0.00017943	17.4582	1	0.0170016	5.27208	1	ACGUUGGCUCUGGUGGUG	experimental		mature miRNA	standard	MIMAT0005950	hsa-miR-1306-3p	hsa-miR-1306-3p
1053	hsa-miR-1306-5p	7.25932	8.3344	0.672831	6.33701	3.79697	0.168583	3.7735	6.38196	0.687557	7.53435	3.82879	0.224808	7.40484	20.5283	0.503344	0.0129166	6.14675	1	6.9988	16.2139	0.0126482	0.0149556	8.4097	1	CCACCUCCCCUGCAAACGUCCA	experimental		mature miRNA	standard	MIMAT0022726	hsa-miR-1306-5p	hsa-miR-1306-5p
1054	hsa-miR-1307-3p	108.931	24.7548	3.56135e-08	62.9676	53.5661	0.463694	41.2084	11.3317	0.0159946	40.9149	10.353	0.000245291	26.9856	24.2917	0.284579	27.7429	21.1675	0.069148	41.9516	18.2302	3.4518e-07	43.3952	12.159	0.0232214	ACUCGGCGUGGCGUCGGUCGUG	experimental		mature miRNA	standard	MIMAT0005951	hsa-miR-1307-3p	hsa-miR-1307-3p
1055	hsa-miR-1307-5p	698.848	76.4439	1.74753e-20	7.22657	4.71945	0.211465	0.86667	8.33777	0.944875	0.0412759	3.38655	1	5.93058	23.7998	0.629466	2.19105	9.44916	0.826848	5.282	17.2813	0.0586228	0.0196654	5.92108	1	UCGACCGGACCUCGACCGGCU	experimental		mature miRNA	standard	MIMAT0022727	hsa-miR-1307-5p	hsa-miR-1307-5p
1056	hsa-miR-1321	32.4546	20.5207	0.463418	0.00960896	6.14784	1	1.02628	5.2728	0.894766	0.0674373	4.74477	1	0.0014869	18.4951	1	0.0198497	9.29549	1	0.160967	18.6412	0.864202	0.027349	9.58643	1	CAGGGAGGUGAAUGUGAU	experimental		mature miRNA	standard	MIMAT0005952	hsa-miR-1321	hsa-miR-1321
1057	hsa-miR-1322	4.84115	10.1687	0.838311	1.05649	5.13822	0.8581	2.625	6.93787	0.77985	0.0403537	3.62552	1	1.53454	12.8231	0.75715	4.89086	6.95796	0.449438	1.57412	16.6216	0.396706	0.0175405	5.99355	1	GAUGAUGCUGCUGAUGCUG	experimental		mature miRNA	standard	MIMAT0005953	hsa-miR-1322	hsa-miR-1322
1058	hsa-miR-1323	34.8782	39.1063	0.442262	0.373718	2.92926	0.936872	0.0122096	6.92878	1	0.0453413	5.08965	1	6.06897	15.1	0.481943	7.90173	9.28142	0.350238	1.16886	13.0775	0.374961	14.1163	5.79879	0.170302	UCAAAACUGAGGGGCAUUUUCU	experimental		mature miRNA	standard	MIMAT0005795	hsa-miR-1323	hsa-miR-1323
1059	hsa-miR-1324	0.0685092	7.31804	1	0.013371	6.1809	1	0.540349	5.75662	0.939561	0.0517344	3.99397	1	6.38368	16.7743	0.38704	0.0157626	8.06355	1	0.000170989	17.6289	1	3.39523	5.19238	0.660114	CCAGACAGAAUUCUAUGCACUUUC	experimental		mature miRNA	standard	MIMAT0005956	hsa-miR-1324	hsa-miR-1324
1060	hsa-miR-1343-3p	18.7193	34.6487	0.661926	10.4195	2.76305	0.0582795	0.013822	7.74811	1	3.30915	3.28437	0.66358	0.988069	11.5277	0.871712	5.21201	9.99261	0.554679	2.23898	12.1165	0.196794	9.18297	5.71023	0.339316	CUCCUGGGGCCCGCACUCUCGC	experimental		mature miRNA	standard	MIMAT0019776	hsa-miR-1343-3p	hsa-miR-1343-3p
1061	hsa-miR-1343-5p	0.50712	6.50611	0.970389	14.2131	4.46931	0.0705837	25.8001	8.82943	0.0420519	10.3436	4.25378	0.069366	1.86316	16.654	0.846833	4.69326	13.642	0.630613	7.35389	22.5297	0.139684	4.72934	5.96472	0.575484	UGGGGAGCGGCCCCCGGGUGGG	experimental		mature miRNA	standard	MIMAT0027038	hsa-miR-1343-5p	hsa-miR-1343-5p
1062	hsa-miR-1468-3p	0.0559504	4.94526	1	5.03324	2.5838	0.293421	10.8458	7.002	0.284295	0.0438277	3.03899	1	0.866944	14.8137	0.8792	3.42875	9.18675	0.701898	0.000280619	10.6328	1	0.617773	6.65539	0.945562	AGCAAAAUAAGCAAAUGGAAAA	experimental		mature miRNA	standard	MIMAT0026638	hsa-miR-1468-3p	hsa-miR-1468-3p
1063	hsa-miR-1468-5p	0.0620617	3.24853	1	9.23128	2.49327	0.0556465	0.458207	8.57533	0.968877	0.0480427	3.03484	1	0.327479	18.9467	0.958831	2.94649	8.74599	0.738693	0.000259843	16.2968	1	0.825114	8.25059	0.940832	CUCCGUUUGCCUGUUUCGCUG	experimental		mature miRNA	standard	MIMAT0006789	hsa-miR-1468-5p	hsa-miR-1468-5p
1064	hsa-miR-1469	185.771	24.4425	1.08166e-19	34.8258	10.496	0.067276	216.624	34.2891	1.28016e-07	114.848	12.9496	2.2333e-19	63.4724	25.1817	0.0207187	120.12	23.6261	1.93447e-10	78.0685	26.0768	4.67423e-07	105.681	10.4339	8.64237e-12	CUCGGCGCGGGGCGCGGGCUCC	experimental		mature miRNA	standard	MIMAT0007347	hsa-miR-1469	hsa-miR-1469
1065	hsa-miR-1470	0.595584	4.54367	0.964074	308.431	39.4541	1.20167e-08	3.30436	7.42924	0.832394	134.226	13.0447	2.75112e-15	0.00292589	18.2966	1	16.1347	11.9436	0.182628	0.000469675	15.2045	1	0.489942	8.19458	0.972902	GCCCUCCGCCCGUGCACCCCG	experimental		mature miRNA	standard	MIMAT0007348	hsa-miR-1470	hsa-miR-1470
1066	hsa-miR-1471	0.0973527	6.44026	1	0.0136428	2.94756	1	0.012879	6.82324	1	0.0799024	3.37804	1	0.0014169	18.1298	1	13.072	11.7226	0.380223	0.000171977	14.0692	1	0.0231184	5.06468	1	GCCCGCGUGUGGAGCCAGGUGU	experimental		mature miRNA	standard	MIMAT0007349	hsa-miR-1471	hsa-miR-1471
1067	hsa-miR-1537-3p	0.0760119	7.36903	1	0.00889821	6.85656	1	0.00998408	5.13818	1	1.26209	2.342	0.85345	0.389667	16.8899	0.935674	3.89932	12.4836	0.729345	9.88681	14.4954	2.46268e-06	0.0182255	7.87235	1	AAAACCGUCUAGUUACAGUUGU	experimental		mature miRNA	standard	MIMAT0007399	hsa-miR-1537-3p	hsa-miR-1537-3p
1068	hsa-miR-1537-5p	0.0523366	6.72484	1	3.40211	4.7952	0.631768	0.00956235	7.61446	1	4.79733	2.93688	0.284754	25.2442	112.308	0.72678	0.00963598	6.81109	1	18.4092	42.2147	0.0346143	19.0765	34.3083	0.590993	AGCUGUAAUUAGUCAGUUUUCU	experimental		mature miRNA	standard	MIMAT0026765	hsa-miR-1537-5p	hsa-miR-1537-5p
1069	hsa-miR-1538	0.0966527	4.8833	1	0.00902377	5.90525	1	0.0107808	6.69696	1	13.5758	3.57853	0.108179	0.00141147	12.102	1	0.0149728	12.2036	1	8.74424	23.7566	0.00333007	0.0203229	7.74377	1	CGGCCCGGGCUGCUGCUGUUCCU	experimental		mature miRNA	standard	MIMAT0007400	hsa-miR-1538	hsa-miR-1538
1070	hsa-miR-1539	0.100433	5.44179	1	0.00863543	6.76637	1	0.0103891	8.04784	1	3.11274	2.53034	0.700593	0.00132341	14.4986	1	0.0150303	15.1262	1	7.14265	54.4374	0.241019	0.0200289	5.08296	1	UCCUGCGCGUCCCAGAUGCCC	experimental		mature miRNA	standard	MIMAT0007401	hsa-miR-1539	hsa-miR-1539
1071	hsa-miR-1587	411.095	35.5471	5.33123e-37	20.3849	9.13359	0.24961	547.375	37.8713	1.61353e-41	117.475	14.0158	2.76996e-17	11.9379	23.3474	0.61284	485.256	54.2145	7.27669e-23	434.706	73.0659	1.71216e-12	212.363	53.5852	0.0045927	UUGGGCUGGGCUGGGUUGGG	experimental		mature miRNA	standard	MIMAT0019077	hsa-miR-1587	hsa-miR-1587
1072	hsa-miR-1825	3.1747	5.55315	0.77662	9.42113	4.63322	0.141527	3.48378	6.22691	0.711392	12.7428	5.24432	0.0964688	1.41112	17.479	0.86772	9.13309	16.7779	0.49261	26.1126	32.2983	0.0079511	0.0167994	5.90065	1	UCCAGUGCCCUCCUCUCC	experimental		mature miRNA	standard	MIMAT0006765	hsa-miR-1825	hsa-miR-1825
1073	hsa-miR-1827	0.0610081	5.56064	1	54.42	20.1935	0.0225651	0.0101107	7.80463	1	4.8449	2.92381	0.251717	31.193	39.5719	0.195952	2.09493	6.87214	0.65611	57.0923	34.4048	7.69175e-06	0.0104901	6.17743	1	UGAGGCAGUAGAUUGAAU	experimental		mature miRNA	standard	MIMAT0006767	hsa-miR-1827	hsa-miR-1827
1074	hsa-miR-1908-3p	142.16	23.5381	2.28163e-11	0.0137804	3.42476	1	3.04857	5.53751	0.72642	2.7434	4.74809	0.812546	5.39423	19.1654	0.670207	3.43625	6.62884	0.609987	7.28714	17.496	0.0108731	9.40054	11.3555	0.72639	CCGGCCGCCGGCUCCGCCCCG	experimental		mature miRNA	standard	MIMAT0026916	hsa-miR-1908-3p	hsa-miR-1908-3p
1075	hsa-miR-1908-5p	58.0732	55.2196	0.389855	0.0103053	3.17731	1	3.38259	6.73348	0.736572	0.0526417	1.94968	1	0.0637493	10.4874	0.983108	292.41	49.9348	8.00554e-10	4.82009	19.4438	0.0658494	0.0296816	6.5008	1	CGGCGGGGACGGCGAUUGGUC	experimental		mature miRNA	standard	MIMAT0007881	hsa-miR-1908-5p	hsa-miR-1908-5p
1076	hsa-miR-1909-3p	10.8318	13.4925	0.725128	7.83334	25.5591	0.821078	6.89294	6.16181	0.491131	4.42269	3.81809	0.639495	0.00190191	15.5382	1	0.0153592	4.64293	1	2.63113	16.2167	0.20568	0.0196107	8.64722	1	CGCAGGGGCCGGGUGCUCACCG	experimental		mature miRNA	standard	MIMAT0007883	hsa-miR-1909-3p	hsa-miR-1909-3p
1077	hsa-miR-1909-5p	46.2415	91.6654	0.650695	0.0131664	2.75238	1	21.7721	16.33	0.364346	0.053404	4.06681	1	0.00216737	15.4116	1	12.1575	16.2139	0.462191	4.22703	16.6737	0.0593481	8.30557	11.5516	0.797857	UGAGUGCCGGUGCCUGCCCUG	experimental		mature miRNA	standard	MIMAT0007882	hsa-miR-1909-5p	hsa-miR-1909-5p
1078	hsa-miR-1910-3p	0.186348	4.95226	0.992528	0.0134553	3.86189	1	4.01704	10.6896	0.786727	6.00566	3.49163	0.472737	0.00208146	23.8023	1	4.15494	9.96008	0.656124	3.76596	11.4238	0.0117427	3.58396	6.34194	0.800341	GAGGCAGAAGCAGGAUGACA	experimental		mature miRNA	standard	MIMAT0026917	hsa-miR-1910-3p	hsa-miR-1910-3p
1079	hsa-miR-1910-5p	13.1125	11.3449	0.595622	0.00890492	4.89256	1	0.0111647	4.42664	1	0.0495807	1.67182	1	6.18307	16.3905	0.387114	7.06832	9.26534	0.452534	3.83695	17.4554	0.0431312	0.0216872	5.84361	1	CCAGUCCUGUGCCUGCCGCCU	experimental		mature miRNA	standard	MIMAT0007884	hsa-miR-1910-5p	hsa-miR-1910-5p
1080	hsa-miR-1911-3p	0.0904891	4.40674	1	0.00703942	5.42725	1	0.0795696	6.42034	0.989539	0.0439421	1.32271	1	1.31063	23.0918	0.834878	0.0134385	6.99497	1	2.57356	14.9397	0.0282449	0.0154922	5.84757	1	CACCAGGCAUUGUGGUCUCC	experimental		mature miRNA	standard	MIMAT0007886	hsa-miR-1911-3p	hsa-miR-1911-3p
1081	hsa-miR-1911-5p	0.0482838	4.65897	1	0.0123387	3.38293	1	6.00777	5.65921	0.402097	6.83065	3.56255	0.299371	0.313759	19.2734	0.964848	0.72479	8.78055	0.927776	3.42613	18.3405	0.140814	5.19195	7.86595	0.701476	UGAGUACCGCCAUGUCUGUUGGG	experimental		mature miRNA	standard	MIMAT0007885	hsa-miR-1911-5p	hsa-miR-1911-5p
1082	hsa-miR-1912	0.113097	5.06873	1	0.00838052	10.2938	1	0.00994067	5.7155	1	0.0622565	2.26985	1	0.00113564	16.1078	1	0.0162139	12.2689	1	0.475779	13.4987	0.474869	0.0195681	5.29413	1	UACCCAGAGCAUGCAGUGUGAA	experimental		mature miRNA	standard	MIMAT0007887	hsa-miR-1912	hsa-miR-1912
1083	hsa-miR-1913	9.94666	3.79129	0.12555	0.00917945	4.90904	1	8.38425	7.24331	0.413643	0.564777	3.67634	0.957523	11.0954	23.4613	0.391847	5.54557	8.62846	0.508411	5.60995	18.5338	0.0418467	0.0221777	7.2239	1	UCUGCCCCCUCCGCUGCUGCCA	experimental		mature miRNA	standard	MIMAT0007888	hsa-miR-1913	hsa-miR-1913
1084	hsa-miR-1914-3p	0.0641541	3.6889	1	0.0134175	10.4377	1	0.0108186	12.7883	1	2.10864	2.20954	0.766403	0.00181173	26.3833	1	5.72649	6.52066	0.332244	3.73649	19.2149	0.0789184	5.03891	5.14497	0.629071	GGAGGGGUCCCGCACUGGGAGG	experimental		mature miRNA	standard	MIMAT0007890	hsa-miR-1914-3p	hsa-miR-1914-3p
1085	hsa-miR-1914-5p	10.088	5.97627	0.45898	0.00746612	5.14055	1	8.60584	6.11783	0.272056	0.0421302	3.25713	1	13.0217	14.4819	0.0552775	0.0150223	10.0985	1	1.89746	11.3678	0.058916	0.0191889	5.51057	1	CCCUGUGCCCGGCCCACUUCUG	experimental		mature miRNA	standard	MIMAT0007889	hsa-miR-1914-5p	hsa-miR-1914-5p
1086	hsa-miR-1915-3p	126.947	17.0531	4.17502e-21	83.0772	14.3512	9.4998e-05	157.256	37.649	0.000694604	134.515	13.7232	5.46394e-24	148.56	58.2082	0.0194857	126.343	37.2971	1.48239e-05	228.488	20.3984	1.15449e-47	163.687	26.5384	8.68844e-06	CCCCAGGGCGACGCGGCGGG	experimental		mature miRNA	standard	MIMAT0007892	hsa-miR-1915-3p	hsa-miR-1915-3p
1087	hsa-miR-1915-5p	4.24749	4.81741	0.746499	7.98473	22.9648	0.803237	0.0107362	8.26294	1	0.0418465	2.46999	1	0.314411	15.1588	0.947596	0.0126475	13.7045	1	4.2012	10.7292	0.00069109	2.70787	7.5181	0.794477	ACCUUGCCUUGCUGCCCGGGCC	experimental		mature miRNA	standard	MIMAT0007891	hsa-miR-1915-5p	hsa-miR-1915-5p
1088	hsa-miR-1972	0.0931664	4.44184	1	0.0095319	5.11715	1	0.0103142	3.81217	1	0.0607406	2.1391	1	0.00129133	17.4917	1	6.4021	14.2368	0.66478	0.790541	14.6696	0.410095	0.0215438	6.60026	1	UCAGGCCAGGCACAGUGGCUCA	experimental		mature miRNA	standard	MIMAT0009447	hsa-miR-1972	hsa-miR-1972
1089	hsa-miR-1973	668.296	26.559	1.87637e-156	955.659	85.8281	4.83888e-28	679.605	53.5401	5.71193e-33	1193.47	63.4472	1.31952e-79	499.009	56.4339	6.67034e-18	433.09	26.9404	6.26981e-70	593.167	39.8792	5.93923e-59	535.126	54.498	1.2338e-14	ACCGUGCAAAGGUAGCAUA	experimental		mature miRNA	standard	MIMAT0009448	hsa-miR-1973	hsa-miR-1973
1090	hsa-miR-1976	14.6632	7.22889	0.0519967	0.0148056	5.10807	1	4.66574	4.98371	0.549556	13.1279	3.98229	0.0576067	2.38967	16.3315	0.814117	11.0378	7.67149	0.100197	9.05315	20.0796	0.0231623	15.0118	10.1293	0.50083	CCUCCUGCCCUCCUUGCUGU	experimental		mature miRNA	standard	MIMAT0009451	hsa-miR-1976	hsa-miR-1976
1091	hsa-miR-2052	0.0930125	5.71603	1	0.012429	4.49048	1	0.918196	5.31373	0.90392	0.072342	3.93277	1	0.00139703	18.2452	1	0.810237	5.80432	0.927385	0.00017446	17.5699	1	0.0222656	4.43178	1	UGUUUUGAUAACAGUAAUGU	experimental		mature miRNA	standard	MIMAT0009977	hsa-miR-2052	hsa-miR-2052
1092	hsa-miR-2053	0.100116	4.81954	1	0.0133667	3.47065	1	0.0127965	8.66221	1	0.0800843	2.83766	1	0.00139004	16.6496	1	5.45924	4.67839	0.393697	0.000166312	16.9696	1	0.0227895	4.46126	1	GUGUUAAUUAAACCUCUAUUUAC	experimental		mature miRNA	standard	MIMAT0009978	hsa-miR-2053	hsa-miR-2053
1093	hsa-miR-2054	0.0792964	5.85944	1	0.0167872	3.41997	1	0.0126954	6.33724	1	0.0758346	2.18489	1	0.00163435	31.9058	1	11.7803	8.9781	0.26912	0.000180295	14.8812	1	1.44492	3.34969	0.843251	CUGUAAUAUAAAUUUAAUUUAUU	experimental		mature miRNA	standard	MIMAT0009979	hsa-miR-2054	hsa-miR-2054
1094	hsa-miR-2110	0.0788838	6.28342	1	0.0125851	3.52839	1	309.936	36.745	3.60894e-12	3.87793	2.63809	0.673742	0.00164501	20.5266	1	0.0192412	14.4224	1	0.00021403	15.848	1	0.0221024	7.88729	1	UUGGGGAAACGGCCGCUGAGUG	experimental		mature miRNA	standard	MIMAT0010133	hsa-miR-2110	hsa-miR-2110
1095	hsa-miR-2113	0.0992149	6.33131	1	0.0112665	3.69812	1	5.04124	5.11835	0.496928	0.0699671	3.15204	1	0.00131251	15.9441	1	0.0198289	8.82856	1	0.000158888	22.052	1	0.0210184	5.26669	1	AUUUGUGCUUGGCUCUGUCAC	experimental		mature miRNA	standard	MIMAT0009206	hsa-miR-2113	hsa-miR-2113
1096	hsa-miR-2114-3p	0.0857186	7.36085	1	0.00743886	2.49994	1	49.6118	92.0744	0.642628	0.0479347	2.75742	1	0.00122692	22.6449	1	0.014512	12.2295	1	2.70155	68.7906	0.65369	0.0196431	6.42947	1	CGAGCCUCAAGCAAGGGACUU	experimental		mature miRNA	standard	MIMAT0011157	hsa-miR-2114-3p	hsa-miR-2114-3p
1097	hsa-miR-2114-5p	0.0519051	5.96948	1	630.494	105.871	8.3613e-08	50.2593	43.3018	0.463826	2.67641	3.58825	0.707197	6.60286	23.9772	0.628032	6.33814	11.1382	0.511891	0.000432944	10.4568	1	0.0112388	8.11546	1	UAGUCCCUUCCUUGAAGCGGUC	experimental		mature miRNA	standard	MIMAT0011156	hsa-miR-2114-5p	hsa-miR-2114-5p
1098	hsa-miR-2115-3p	0.0418236	6.07285	1	0.0239916	4.10607	1	470.504	72.1799	7.72352e-09	142.361	19.2839	1.16182e-08	0.00281063	20.7223	1	0.0412973	10.4055	0.99787	0.000298348	15.3906	1	518.306	41.7186	1.22144e-24	CAUCAGAAUUCAUGGAGGCUAG	experimental		mature miRNA	standard	MIMAT0011159	hsa-miR-2115-3p	hsa-miR-2115-3p
1099	hsa-miR-2115-5p	0.0677938	6.00689	1	0.0201343	4.59744	1	0.0122475	4.94754	1	0.0718226	2.45345	1	0.00182458	12.3648	1	0.777627	7.59715	0.938699	0.000172473	15.1779	1	174.542	157.439	0.418248	AGCUUCCAUGACUCCUGAUGGA	experimental		mature miRNA	standard	MIMAT0011158	hsa-miR-2115-5p	hsa-miR-2115-5p
1100	hsa-miR-2116-3p	0.0673371	4.95705	1	0.0117297	4.06735	1	53.9353	40.542	0.329212	0.0526788	2.23274	1	0.659119	16.0545	0.897985	6.42167	8.54991	0.507034	0.000224243	19.1935	1	0.0191472	5.18404	1	CCUCCCAUGCCAAGAACUCCC	experimental		mature miRNA	standard	MIMAT0011161	hsa-miR-2116-3p	hsa-miR-2116-3p
1101	hsa-miR-2116-5p	229.237	30.1612	4.04671e-15	0.0235158	5.5475	1	12.1764	5.23093	0.209198	0.0746276	2.87184	1	0.00274569	18.7825	1	5.65391	9.91919	0.695161	0.000269276	15.1532	1	280.354	26.9071	2.09181e-11	GGUUCUUAGCAUAGGAGGUCU	experimental		mature miRNA	standard	MIMAT0011160	hsa-miR-2116-5p	hsa-miR-2116-5p
1102	hsa-miR-2117	0.0558681	5.74492	1	309.824	362.487	0.489574	214.845	162.618	0.302043	0.0448997	3.8015	1	0.00196326	15.1034	1	6.46147	11.0346	0.542105	0.000347713	15.021	1	0.386799	6.27633	0.96466	UGUUCUCUUUGCCAAGGACAG	experimental		mature miRNA	standard	MIMAT0011162	hsa-miR-2117	hsa-miR-2117
1103	hsa-miR-2276-3p	7.36816	6.8737	0.698915	2.85001	3.63647	0.454695	0.0109369	9.57968	1	0.279102	3.34044	0.977808	11.3679	42.6675	0.576519	0.0130671	10.458	1	11.9778	12.3478	3.69176e-09	0.0141639	8.8886	1	UCUGCAAGUGUCAGAGGCGAGG	experimental		mature miRNA	standard	MIMAT0011775	hsa-miR-2276-3p	hsa-miR-2276-3p
1104	hsa-miR-2276-5p	13.0127	4.88937	0.424235	0.00837838	2.2174	1	0.0113343	4.84216	1	0.0652349	2.26799	1	0.00132002	12.609	1	0.0177991	9.00685	1	4.92047	12.9708	5.82837e-05	0.0249835	7.11147	1	GCCCUCUGUCACCUUGCAGACG	experimental		mature miRNA	standard	MIMAT0026921	hsa-miR-2276-5p	hsa-miR-2276-5p
1105	hsa-miR-2277-3p	33.7378	14.4486	0.214842	17.4094	17.7092	0.374094	0.01129	6.78719	1	0.0409276	3.52842	1	2.27366	10.3077	0.551074	0.0135809	10.0532	1	11.4039	15.4176	5.14214e-06	0.0144943	5.53492	1	UGACAGCGCCCUGCCUGGCUC	experimental		mature miRNA	standard	MIMAT0011777	hsa-miR-2277-3p	hsa-miR-2277-3p
1106	hsa-miR-2277-5p	0.0869221	5.60379	1	1.40787	2.42284	0.512126	0.0086862	7.3559	1	0.0355622	2.33157	1	14.7875	53.683	0.506802	0.0113912	7.27197	1	6.6737	10.8288	1.64588e-07	0.010994	7.31121	1	AGCGCGGGCUGAGCGCUGCCAGUC	experimental		mature miRNA	standard	MIMAT0017352	hsa-miR-2277-5p	hsa-miR-2277-5p
1107	hsa-miR-2278	13.7674	5.08244	0.0491112	10.2262	5.25975	0.165249	1.15296	6.50708	0.90779	11.647	3.30862	0.0165769	16.4647	23.1876	0.308678	10.0618	12.7943	0.33028	20.2803	17.2154	3.49688e-05	0.0168147	7.03171	1	GAGAGCAGUGUGUGUUGCCUGG	experimental		mature miRNA	standard	MIMAT0011778	hsa-miR-2278	hsa-miR-2278
1108	hsa-miR-2355-3p	0.0837159	3.40422	1	3.05175	4.69988	0.568219	0.0104899	6.27137	1	5.63375	4.15555	0.496256	0.203288	11.4557	0.947314	0.0122293	6.40801	1	7.47434	14.4258	0.000206559	0.0130465	6.53976	1	AUUGUCCUUGCUGUUUGGAGAU	experimental		mature miRNA	standard	MIMAT0017950	hsa-miR-2355-3p	hsa-miR-2355-3p
1109	hsa-miR-2355-5p	0.655512	3.08744	0.9663	4.83781	2.04567	0.0426872	2.32089	8.02699	0.828213	0.89774	3.7104	0.933637	0.00156148	24.5456	1	0.0135913	6.11798	1	8.12131	11.3351	2.34951e-06	0.0165699	6.04118	1	AUCCCCAGAUACAAUGGACAA	experimental		mature miRNA	standard	MIMAT0016895	hsa-miR-2355-5p	hsa-miR-2355-5p
1110	hsa-miR-2392	74.246	21.0849	1.2139e-06	77.4179	13.4147	0.000160127	44.731	8.81897	0.000501354	104.982	12.0958	4.65174e-19	416.697	112.523	0.000426265	169.827	40.899	3.20254e-07	66.273	13.4201	9.99624e-18	438.452	64.6923	2.54745e-08	UAGGAUGGGGGUGAGAGGUG	experimental		mature miRNA	standard	MIMAT0019043	hsa-miR-2392	hsa-miR-2392
1111	hsa-miR-2467-3p	46.1349	56.8589	0.504676	12.3218	3.92219	0.0305	0.0139773	6.94577	1	9.38607	4.07562	0.192259	19.6172	26.6465	0.291577	7.89358	10.2517	0.382943	11.4418	12.5153	3.54965e-05	0.0173387	7.78888	1	AGCAGAGGCAGAGAGGCUCAGG	experimental		mature miRNA	standard	MIMAT0019953	hsa-miR-2467-3p	hsa-miR-2467-3p
1112	hsa-miR-2467-5p	9.96191	10.9986	0.765756	0.00771198	2.44877	1	0.0105483	6.29833	1	0.0513147	2.25671	1	1.92508	24.7571	0.81036	0.0158067	10.0163	1	3.38397	13.2958	0.00369989	0.0197132	6.01787	1	UGAGGCUCUGUUAGCCUUGGCUC	experimental		mature miRNA	standard	MIMAT0019952	hsa-miR-2467-5p	hsa-miR-2467-5p
1113	hsa-miR-2681-3p	14.719	3.93281	0.110186	0.00906204	4.15397	1	0.0121648	9.27822	1	4.43495	4.71094	0.723593	4.12206	23.0437	0.680174	0.0160519	10.5625	1	3.36412	16.5152	0.0464732	0.0209199	6.42926	1	UAUCAUGGAGUUGGUAAAGCAC	experimental		mature miRNA	standard	MIMAT0013516	hsa-miR-2681-3p	hsa-miR-2681-3p
1114	hsa-miR-2681-5p	9.00782	6.72194	0.638516	1.97106	4.46032	0.662731	0.0107174	4.70423	1	0.0419496	3.70322	1	5.85191	24.5506	0.553628	0.0137342	9.66629	1	4.29946	11.19	0.000522095	0.0145798	5.89452	1	GUUUUACCACCUCCAGGAGACU	experimental		mature miRNA	standard	MIMAT0013515	hsa-miR-2681-5p	hsa-miR-2681-5p
1115	hsa-miR-2682-3p	14.7203	11.2204	0.44832	4.20015	6.41921	0.654482	0.0123179	5.61276	1	2.91434	2.75271	0.630102	6.37617	9.71937	0.232556	0.0130278	9.19345	1	5.83925	7.08561	1.67526e-08	0.931628	5.93149	0.916451	CGCCUCUUCAGCGCUGUCUUCC	experimental		mature miRNA	standard	MIMAT0013518	hsa-miR-2682-3p	hsa-miR-2682-3p
1116	hsa-miR-2682-5p	0.0838137	4.74862	1	0.00825883	4.74712	1	0.00995539	7.14575	1	4.77569	2.18217	0.32923	6.15264	19.9499	0.43965	0.0134195	7.37367	1	2.58539	12.9759	0.0243227	0.0155393	8.25632	1	CAGGCAGUGACUGUUCAGACGUC	experimental		mature miRNA	standard	MIMAT0013517	hsa-miR-2682-5p	hsa-miR-2682-5p
1117	hsa-miR-2861	35.1873	16.1782	0.00304987	32.6209	4.75585	0.000100481	89.3183	13.5486	9.54919e-07	42.4754	15.004	0.00614523	29.0064	22.8872	0.204086	47.8137	24.128	0.00637557	83.2687	24.2719	8.81883e-10	28.584	10.0741	0.0736324	GGGGCCUGGCGGUGGGCGG	experimental		mature miRNA	standard	MIMAT0013802	hsa-miR-2861	hsa-miR-2861
1118	hsa-miR-2909	0.101072	7.07403	1	0.00948548	3.44923	1	0.0110422	7.70201	1	4.51662	4.13146	0.734366	0.00136852	13.0638	1	0.0159844	9.54903	1	0.949753	15.0497	0.338948	0.0204004	7.12023	1	GUUAGGGCCAACAUCUCUUGG	experimental		mature miRNA	standard	MIMAT0013863	hsa-miR-2909	hsa-miR-2909
1119	hsa-miR-3064-3p	7.08802	7.26777	0.408876	24.9301	12.1854	0.209993	17.3174	12.6369	0.383911	8.02509	4.90135	0.243197	21.3069	34.2713	0.447366	12.6334	14.9431	0.253139	6.55995	19.1961	0.138007	0.685786	11.7592	0.96978	UUGCCACACUGCAACACCUUACA	experimental		mature miRNA	standard	MIMAT0019865	hsa-miR-3064-3p	hsa-miR-3064-3p
1120	hsa-miR-3064-5p	10.5904	14.7245	0.558559	6.1406	3.69177	0.382665	0.540802	11.4276	0.974689	3.2157	3.27785	0.628836	2.29085	22.7182	0.866163	3.96807	10.2645	0.649214	2.94763	20.543	0.37244	9.30979	6.55487	0.386858	UCUGGCUGUUGUGGUGUGCAA	experimental		mature miRNA	standard	MIMAT0019864	hsa-miR-3064-5p	hsa-miR-3064-5p
1121	hsa-miR-3065-3p	0.0929741	4.72587	1	21.5915	12.3584	0.225572	0.0124568	5.72177	1	9.10983	2.85332	0.178608	0.0015884	22.0564	1	0.0145021	11.8135	1	0.13992	14.2914	0.876045	0.0145303	7.40543	1	UCAGCACCAGGAUAUUGUUGGAG	experimental		mature miRNA	standard	MIMAT0015378	hsa-miR-3065-3p	hsa-miR-3065-3p
1122	hsa-miR-3065-5p	0.0905371	4.61515	1	8.25378	3.02856	0.0109614	0.00946074	7.76957	1	0.0389965	2.95566	1	1.86493	18.1245	0.734781	0.0121502	9.45448	1	0.858407	11.7114	0.316593	0.0110372	4.30037	1	UCAACAAAAUCACUGAUGCUGGA	experimental		mature miRNA	standard	MIMAT0015066	hsa-miR-3065-5p	hsa-miR-3065-5p
1123	hsa-miR-3074-3p	2.94521	8.6733	0.905277	1.54161	3.04225	0.630172	3.99729	7.69511	0.696553	0.556499	3.63686	0.950969	6.9591	13.2287	0.261414	0.0130179	9.35582	1	3.4794	17.4361	0.113526	0.0147055	6.26226	1	GAUAUCAGCUCAGUAGGCACCG	experimental		mature miRNA	standard	MIMAT0015027	hsa-miR-3074-3p	hsa-miR-3074-3p
1124	hsa-miR-3074-5p	0.105609	4.24841	1	4.10845	4.77339	0.440516	0.0100691	5.49697	1	0.050566	3.40039	1	0.00121265	16.7771	1	0.0138484	9.78023	1	1.26338	14.8641	0.247482	0.0144361	5.49253	1	GUUCCUGCUGAACUGAGCCAG	experimental		mature miRNA	standard	MIMAT0019208	hsa-miR-3074-5p	hsa-miR-3074-5p
1125	hsa-miR-3115	0.0755985	4.96809	1	7.38404	2.56307	0.107577	0.0146592	9.16063	1	304.012	29.6202	7.84902e-21	10.2378	19.0025	0.329158	0.0155913	9.30796	1	0.000276711	15.6957	1	0.0127965	6.0336	1	AUAUGGGUUUACUAGUUGGU	experimental		mature miRNA	standard	MIMAT0014977	hsa-miR-3115	hsa-miR-3115
1126	hsa-miR-3116	17.2502	16.5014	0.618072	2.18348	2.48987	0.592606	0.886979	6.51141	0.938466	1.08977	1.95845	0.881729	2.01032	18.7563	0.808808	0.0190942	10.5604	1	0.00025546	17.4472	1	0.0181155	6.87826	1	UGCCUGGAACAUAGUAGGGACU	experimental		mature miRNA	standard	MIMAT0014978	hsa-miR-3116	hsa-miR-3116
1127	hsa-miR-3117-3p	0.0799002	5.35775	1	6.93323	3.39318	0.129217	0.371518	11.057	0.978544	0.0417073	3.47977	1	99.8817	38.296	0.000178593	0.0143988	12.6534	1	0.000213101	16.9475	1	0.0106716	8.32501	1	AUAGGACUCAUAUAGUGCCAG	experimental		mature miRNA	standard	MIMAT0014979	hsa-miR-3117-3p	hsa-miR-3117-3p
1128	hsa-miR-3117-5p	0.0883235	3.88972	1	2.71831	2.8834	0.561324	3.64229	7.39548	0.757894	1.15747	3.24723	0.928412	0.00158667	16.6989	1	0.0176983	11.3048	1	0.00022389	15.5738	1	0.0167327	6.18021	1	AGACACUAUACGAGUCAUAU	experimental		mature miRNA	standard	MIMAT0019197	hsa-miR-3117-5p	hsa-miR-3117-5p
1129	hsa-miR-3118	4.56347	5.96825	0.842696	1.06755	3.21137	0.81667	0.0134815	5.32987	1	0.0600755	3.62617	1	3.1307	20.9094	0.69702	0.0187218	8.64668	1	0.000188987	15.8747	1	0.0161567	8.82042	1	UGUGACUGCAUUAUGAAAAUUCU	experimental		mature miRNA	standard	MIMAT0014980	hsa-miR-3118	hsa-miR-3118
1130	hsa-miR-3119	4.91802	5.90351	0.824006	8.0089	3.61245	0.175645	1.45073	7.79407	0.912397	0.0660116	2.61448	1	0.00160669	15.2315	1	0.0198668	9.5553	1	0.000218521	11.6243	1	0.0190456	7.04491	1	UGGCUUUUAACUUUGAUGGC	experimental		mature miRNA	standard	MIMAT0014981	hsa-miR-3119	hsa-miR-3119
1131	hsa-miR-3120-3p	6.44858	3.61488	0.472926	13.1509	3.45217	0.00963	44.2695	57.2089	0.617046	0.0456086	2.23685	1	5.5733	11.3109	0.294221	0.0168728	8.53932	1	0.000267925	10.8319	1	0.0147954	6.23612	1	CACAGCAAGUGUAGACAGGCA	experimental		mature miRNA	standard	MIMAT0014982	hsa-miR-3120-3p	hsa-miR-3120-3p
1132	hsa-miR-3120-5p	17.9072	26.7913	0.717833	1.53309	2.5988	0.75665	72.5857	77.5425	0.587894	2.04808	2.93501	0.86085	0.00219984	15.959	1	1.03641	11.6491	0.955491	0.000316427	11.9911	1	0.0252793	6.51461	1	CCUGUCUGUGCCUGCUGUACA	experimental		mature miRNA	standard	MIMAT0019198	hsa-miR-3120-5p	hsa-miR-3120-5p
1133	hsa-miR-3121-3p	0.112541	2.73771	1	4.93257	4.16617	0.448337	0.0126631	6.08733	1	0.067933	3.64426	1	0.00132017	12.5913	1	0.0181992	10.5123	1	0.000172166	11.3437	1	0.0155623	4.96427	1	UAAAUAGAGUAGGCAAAGGACA	experimental		mature miRNA	standard	MIMAT0014983	hsa-miR-3121-3p	hsa-miR-3121-3p
1134	hsa-miR-3121-5p	0.0732489	3.24767	1	5.64948	2.81789	0.181578	1.1189	6.12207	0.893707	0.0454239	3.33763	1	4.31455	18.0215	0.556901	0.723805	8.11644	0.938117	0.000244213	14.3987	1	0.0128375	5.12196	1	UCCUUUGCCUAUUCUAUUUAAG	experimental		mature miRNA	standard	MIMAT0019199	hsa-miR-3121-5p	hsa-miR-3121-5p
1135	hsa-miR-3122	4.93267	4.24943	0.419524	1.26288	2.98619	0.819334	6.19242	7.87227	0.621338	2.98136	2.41449	0.571982	0.641968	12.0962	0.916157	12.0129	18.1251	0.433996	0.927922	35.8771	0.84111	5.16151	8.05269	0.730398	GUUGGGACAAGAGGACGGUCUU	experimental		mature miRNA	standard	MIMAT0014984	hsa-miR-3122	hsa-miR-3122
1136	hsa-miR-3123	0.075182	6.1646	1	2.65115	2.97981	0.553692	0.383891	7.30983	0.968555	0.0481291	2.56049	1	3.23867	16.0957	0.604939	1.443	13.3422	0.923601	0.000234816	14.7324	1	0.0135705	5.90564	1	CAGAGAAUUGUUUAAUC	experimental		mature miRNA	standard	MIMAT0014985	hsa-miR-3123	hsa-miR-3123
1137	hsa-miR-3124-3p	3.50065	3.33792	0.52047	8.46997	5.31216	0.466441	36.759	36.1447	0.518567	0.0426183	2.4976	1	7.93436	17.6924	0.486885	3.97012	8.63988	0.65091	0.000341504	18.6916	1	9.48909	5.46982	0.25095	ACUUUCCUCACUCCCGUGAAGU	experimental		mature miRNA	standard	MIMAT0019200	hsa-miR-3124-3p	hsa-miR-3124-3p
1138	hsa-miR-3124-5p	0.0819772	6.03668	1	7.25077	3.45572	0.183295	27.1446	23.9427	0.448867	0.0552005	2.87655	1	0.00151485	12.0092	1	0.173042	8.52209	0.988725	0.000236725	13.1822	1	0.0160865	5.42647	1	UUCGCGGGCGAAGGCAAAGUC	experimental		mature miRNA	standard	MIMAT0014986	hsa-miR-3124-5p	hsa-miR-3124-5p
1139	hsa-miR-3125	5.32244	3.61108	0.303261	11.7242	4.1503	0.301785	1.22829	6.27597	0.919533	10.5204	3.06965	0.116383	1.62617	15.9567	0.874731	22.5989	11.5632	0.0458579	0.000416851	13.2418	1	8.22536	8.25702	0.572269	UAGAGGAAGCUGUGGAGAGA	experimental		mature miRNA	standard	MIMAT0014988	hsa-miR-3125	hsa-miR-3125
1140	hsa-miR-3126-3p	1.19052	6.60114	0.913507	19.9279	7.06216	0.0897987	18.3808	12.9496	0.265645	0.0302336	2.57742	1	1.83501	19.8043	0.860955	15.764	21.0219	0.264429	6.30811	15.285	0.0300452	73.7776	15.3214	0.000135374	CAUCUGGCAUCCGUCACACAGA	experimental		mature miRNA	standard	MIMAT0015377	hsa-miR-3126-3p	hsa-miR-3126-3p
1141	hsa-miR-3126-5p	3.71895	3.3245	0.496514	1.30353	3.26096	0.87439	2.75477	6.44081	0.815872	3.2857	2.70154	0.663702	1.7223	14.4491	0.842015	5.18247	14.4071	0.743143	0.000349559	13.1334	1	14.1341	5.79811	0.171173	UGAGGGACAGAUGCCAGAAGCA	experimental		mature miRNA	standard	MIMAT0014989	hsa-miR-3126-5p	hsa-miR-3126-5p
1142	hsa-miR-3127-3p	0.0610054	4.46083	1	10.8435	4.30131	0.193182	0.0118207	9.06119	1	0.044992	2.37957	1	21.2807	21.9146	0.102572	5.91872	11.6409	0.575654	0.000253175	12.3832	1	1.05413	5.53	0.870783	UCCCCUUCUGCAGGCCUGCUGG	experimental		mature miRNA	standard	MIMAT0019201	hsa-miR-3127-3p	hsa-miR-3127-3p
1143	hsa-miR-3127-5p	15.7567	7.16615	0.0662841	4.3263	3.44197	0.578628	13.5498	5.75839	0.176234	0.0468881	2.98038	1	6.09867	16.4634	0.563002	6.11734	5.41964	0.291827	0.000336244	16.0941	1	9.08708	6.74452	0.429909	AUCAGGGCUUGUGGAAUGGGAAG	experimental		mature miRNA	standard	MIMAT0014990	hsa-miR-3127-5p	hsa-miR-3127-5p
1144	hsa-miR-3128	0.0816929	4.5624	1	6.63187	4.42533	0.361768	0.0132497	7.12912	1	8.79528	4.00299	0.323614	15.5653	28.7176	0.315365	0.015436	11.9661	1	0.000237555	13.6968	1	0.012119	8.36153	1	UCUGGCAAGUAAAAAACUCUCAU	experimental		mature miRNA	standard	MIMAT0014991	hsa-miR-3128	hsa-miR-3128
1145	hsa-miR-3129-3p	0.0453075	4.03526	1	5.53559	3.48376	0.482752	10.8238	6.6534	0.322955	11.793	1.56609	2.10081e-05	4.08443	21.14	0.746903	5.19614	10.1289	0.576586	0.000372023	12.9153	1	1.25215	6.30596	0.886358	AAACUAAUCUCUACACUGCUGC	experimental		mature miRNA	standard	MIMAT0019202	hsa-miR-3129-3p	hsa-miR-3129-3p
1146	hsa-miR-3129-5p	0.0796184	3.37591	1	1.077	3.8343	0.82544	4.04896	10.5937	0.777523	0.0453337	3.63507	1	8.1277	14.5539	0.182369	0.0153954	7.75038	1	0.000206334	10.9685	1	0.0127117	6.88687	1	GCAGUAGUGUAGAGAUUGGUUU	experimental		mature miRNA	standard	MIMAT0014992	hsa-miR-3129-5p	hsa-miR-3129-5p
1147	hsa-miR-3130-3p	0.0825891	4.42792	1	3.53108	4.08997	0.598058	0.0133299	8.54405	1	10.7966	5.21141	0.348248	10.1601	23.2289	0.384792	0.0157718	8.15901	1	0.000232332	10.9986	1	0.0126932	6.6994	1	GCUGCACCGGAGACUGGGUAA	experimental		mature miRNA	standard	MIMAT0014994	hsa-miR-3130-3p	hsa-miR-3130-3p
1148	hsa-miR-3130-5p	0.0456653	4.23279	1	18.9938	5.36155	0.0931006	7.39272	13.2412	0.728317	4.85485	4.51143	0.584414	8.72848	15.3892	0.380374	4.16975	10.935	0.670113	0.000373779	10.1797	1	1.15756	4.86372	0.850162	UACCCAGUCUCCGGUGCAGCC	experimental		mature miRNA	standard	MIMAT0014995	hsa-miR-3130-5p	hsa-miR-3130-5p
1149	hsa-miR-3131	4.42944	5.175	0.767167	4.25019	4.91379	0.61728	0.0142241	12.2533	1	0.0554609	2.31463	1	9.21264	14.5909	0.222535	13.4747	11.4118	0.285178	0.000259547	13.3865	1	0.0166778	6.98947	1	UCGAGGACUGGUGGAAGGGCCUU	experimental		mature miRNA	standard	MIMAT0014996	hsa-miR-3131	hsa-miR-3131
1150	hsa-miR-3132	2.77147	6.67158	0.879506	340.87	27.305	4.05328e-24	0.0166149	10.8185	1	16.9131	4.85559	0.0781337	14.8117	34.2591	0.526225	2.87411	8.86651	0.771047	0.000378634	10.6314	1	0.0137716	3.9125	1	UGGGUAGAGAAGGAGCUCAGAGGA	experimental		mature miRNA	standard	MIMAT0014997	hsa-miR-3132	hsa-miR-3132
1151	hsa-miR-3133	0.051241	5.43695	1	0.00922922	3.7957	1	7.01742	4.68204	0.168204	1.19313	3.2085	0.847316	22.3045	20.1042	0.0547457	0.0106885	11.8257	1	18.9137	20.0932	1.36999e-06	3.80983	8.97348	0.756943	UAAAGAACUCUUAAAACCCAAU	experimental		mature miRNA	standard	MIMAT0014998	hsa-miR-3133	hsa-miR-3133
1152	hsa-miR-3134	0.0436195	4.44568	1	0.0108415	4.2238	1	5.07293	4.67216	0.326244	0.316212	2.92377	0.96451	5.95865	15.4972	0.447525	6.88524	9.38971	0.293415	20.0995	12.7362	4.49648e-13	7.90134	4.78964	0.283063	UGAUGGAUAAAAGACUACAUAUU	experimental		mature miRNA	standard	MIMAT0015000	hsa-miR-3134	hsa-miR-3134
1153	hsa-miR-3135a	0.0518433	5.61422	1	0.011698	4.85282	1	0.009842	4.04644	1	6.33847	2.00392	0.0821365	10.7355	13.9982	0.171313	3.31214	7.97708	0.587562	18.9563	22.5152	3.6765e-05	3.88508	5.51091	0.649438	UGCCUAGGCUGAGACUGCAGUG	experimental		mature miRNA	standard	MIMAT0015001	hsa-miR-3135a	hsa-miR-3135a
1154	hsa-miR-3135b	10.0003	8.99216	0.242803	0.0142102	4.65985	1	19.9739	5.36584	0.0125327	26.8304	5.3817	0.000132965	32.7158	24.2025	0.130511	15.8937	8.70752	0.0195089	31.0261	16.6838	4.4456e-09	18.0926	7.32753	0.220477	GGCUGGAGCGAGUGCAGUGGUG	experimental		mature miRNA	standard	MIMAT0018985	hsa-miR-3135b	hsa-miR-3135b
1155	hsa-miR-3136-3p	0.05404	4.43104	1	3.70378	5.74285	0.655361	0.0104685	8.03519	1	6.52814	2.75639	0.138974	6.27633	16.6422	0.471461	6.86092	7.72806	0.19766	17.4583	24.0271	0.00132953	0.292827	6.37087	0.970997	UGGCCCAACCUAUUCAGUUAGU	experimental		mature miRNA	standard	MIMAT0019203	hsa-miR-3136-3p	hsa-miR-3136-3p
1156	hsa-miR-3136-5p	0.0476323	3.78875	1	0.00963293	2.84799	1	4.11032	2.75112	0.145451	0.0326049	2.40451	1	12.1707	14.2476	0.0934882	2.79204	3.72951	0.304472	16.0582	16.2521	9.95317e-08	5.53487	6.53606	0.561625	CUGACUGAAUAGGUAGGGUCAUU	experimental		mature miRNA	standard	MIMAT0015003	hsa-miR-3136-5p	hsa-miR-3136-5p
1157	hsa-miR-3137	0.0800457	10.9806	1	0.00632977	4.90759	1	0.823962	5.3263	0.871477	0.0369321	4.96131	1	8.01405	22.0751	0.316821	0.0121797	7.49269	1	13.8335	17.6165	9.2034e-08	0.0145106	6.22981	1	UCUGUAGCCUGGGAGCAAUGGGGU	experimental		mature miRNA	standard	MIMAT0015005	hsa-miR-3137	hsa-miR-3137
1158	hsa-miR-3138	0.0413924	6.0373	1	0.0117861	4.66834	1	3.97158	5.62605	0.545767	4.3926	2.41917	0.271817	7.52332	16.0294	0.412394	4.11552	9.21946	0.531629	23.2564	21.3535	6.93272e-06	9.57591	5.26255	0.239195	UGUGGACAGUGAGGUAGAGGGAGU	experimental		mature miRNA	standard	MIMAT0015006	hsa-miR-3138	hsa-miR-3138
1159	hsa-miR-3139	0.069898	8.42271	1	0.00787761	4.22532	1	0.429586	3.77664	0.904216	0.0377644	2.86991	1	2.61427	16.2359	0.631682	0.0117858	7.13731	1	10.4354	15.2498	2.07989e-07	0.602371	7.91441	0.957937	UAGGAGCUCAACAGAUGCCUGUU	experimental		mature miRNA	standard	MIMAT0015007	hsa-miR-3139	hsa-miR-3139
1160	hsa-miR-3140-3p	0.0648696	5.78479	1	0.262014	2.0444	0.913384	8.1623	8.1876	0.42861	3.55987	2.5732	0.528452	0.00170591	24.4903	1	0.0123059	12.581	1	14.2927	18.3418	1.65495e-05	0.676661	4.73239	0.931216	AGCUUUUGGGAAUUCAGGUAGU	experimental		mature miRNA	standard	MIMAT0015008	hsa-miR-3140-3p	hsa-miR-3140-3p
1161	hsa-miR-3140-5p	0.0568248	5.93271	1	0.0144827	3.18027	1	0.0106442	6.5941	1	8.05976	3.95833	0.381857	0.00200606	14.1889	1	1.3982	4.88125	0.753091	16.3061	51.8198	0.0859006	52.8994	70.6564	0.652086	ACCUGAAUUACCAAAAGCUUU	experimental		mature miRNA	standard	MIMAT0019204	hsa-miR-3140-5p	hsa-miR-3140-5p
1162	hsa-miR-3141	352.056	28.6125	7.39957e-43	157.196	61.3586	0.0370409	176.204	23.0472	1.2235e-10	191.936	16.4335	3.91875e-33	331.141	77.7541	5.33274e-05	379.561	34.7339	1.03691e-34	390.959	44.1339	3.00658e-25	569.97	61.006	1.25185e-14	GAGGGCGGGUGGAGGAGGA	experimental		mature miRNA	standard	MIMAT0015010	hsa-miR-3141	hsa-miR-3141
1163	hsa-miR-3142	0.0974609	5.19607	1	0.00832542	5.44457	1	0.00960524	7.36476	1	0.0567881	2.9395	1	0.00121247	18.7135	1	0.908801	7.60277	0.914583	6.73991	14.9789	3.12877e-05	0.0205452	4.89659	1	AAGGCCUUUCUGAACCUUCAGA	experimental		mature miRNA	standard	MIMAT0015011	hsa-miR-3142	hsa-miR-3142
1164	hsa-miR-3143	0.045726	4.42655	1	0.0108165	4.69065	1	3.96373	7.74954	0.647561	1.80399	3.34515	0.78059	2.26946	13.8066	0.715884	0.520943	10.1612	0.949909	40.3284	36.2273	0.000108902	10.7053	6.17841	0.255474	AUAACAUUGUAAAGCGCUUCUUUCG	experimental		mature miRNA	standard	MIMAT0015012	hsa-miR-3143	hsa-miR-3143
1165	hsa-miR-3144-3p	0.0799981	3.94199	1	0.00707962	9.38295	1	363.291	61.7852	3.16298e-08	0.0443088	2.5889	1	0.0012432	20.0064	1	0.0139167	8.37906	1	6.88808	13.143	1.08526e-05	0.019585	6.02016	1	AUAUACCUGUUCGGUCUCUUUA	experimental		mature miRNA	standard	MIMAT0015015	hsa-miR-3144-3p	hsa-miR-3144-3p
1166	hsa-miR-3144-5p	0.10098	5.43242	1	121.518	29.7267	0.000187887	0.00988092	7.63205	1	0.0436254	2.85053	1	0.00124514	20.06	1	0.0123129	13.7188	1	5.88423	23.5824	0.0379727	0.0121113	6.23141	1	AGGGGACCAAAGAGAUAUAUAG	experimental		mature miRNA	standard	MIMAT0015014	hsa-miR-3144-5p	hsa-miR-3144-5p
1167	hsa-miR-3145-3p	0.0730368	3.54829	1	0.00673264	5.29449	1	69.6286	98.1014	0.517156	0.0370085	3.74741	1	1.67994	16.0365	0.726954	0.0127512	9.59498	1	2.87011	17.5054	0.0773615	0.0155993	3.83619	1	AGAUAUUUUGAGUGUUUGGAAUUG	experimental		mature miRNA	standard	MIMAT0015016	hsa-miR-3145-3p	hsa-miR-3145-3p
1168	hsa-miR-3145-5p	0.100093	10.5719	1	299.734	82.2632	0.000585662	0.00993957	5.32309	1	0.0425493	2.21923	1	0.00125894	11.5008	1	0.0120925	10.0888	1	5.79069	12.0643	9.01611e-05	0.0116032	6.42594	1	AACUCCAAACACUCAAAACUCA	experimental		mature miRNA	standard	MIMAT0019205	hsa-miR-3145-5p	hsa-miR-3145-5p
1169	hsa-miR-3146	0.0744946	4.86816	1	0.0101049	5.3089	1	0.0088441	4.75898	1	0.046736	4.14164	1	0.08447	8.38252	0.964811	0.0126128	9.59587	1	3.77692	12.3763	0.000436925	10.4555	7.76151	0.373192	CAUGCUAGGAUAGAAAGAAUGG	experimental		mature miRNA	standard	MIMAT0015018	hsa-miR-3146	hsa-miR-3146
1170	hsa-miR-3147	50.5919	18.9157	0.0005498	11.3998	6.91834	0.433934	41.1796	22.7036	0.226264	28.8597	7.85023	0.00191497	3.65786	16.6393	0.788992	29.9843	18.2175	0.0293558	22.6064	17.4867	0.000202079	43.9498	9.53652	0.00558758	GGUUGGGCAGUGAGGAGGGUGUGA	experimental		mature miRNA	standard	MIMAT0015019	hsa-miR-3147	hsa-miR-3147
1171	hsa-miR-3148	27.4008	41.014	0.512671	0.015943	5.65468	1	0.013021	6.10195	1	5.38094	4.93539	0.628647	10.6482	22.6275	0.523252	27.412	12.5685	0.0104526	9.1492	17.0158	0.00307873	50.6389	13.0689	0.0349681	UGGAAAAAACUGGUGUGUGCUU	experimental		mature miRNA	standard	MIMAT0015021	hsa-miR-3148	hsa-miR-3148
1172	hsa-miR-3149	161.023	15.4811	7.253e-37	77.0303	13.8915	0.000435389	68.6753	15.2233	0.00153203	102.847	15.5764	2.14265e-11	160.562	45.2596	0.00121	102.322	22.8014	1.10337e-08	40.818	58.7514	0.165337	107.586	16.3361	5.6478e-06	UUUGUAUGGAUAUGUGUGUGUAU	experimental		mature miRNA	standard	MIMAT0015022	hsa-miR-3149	hsa-miR-3149
1173	hsa-miR-3150a-3p	0.0963816	5.69544	1	0.00875628	3.55176	1	0.00987513	7.63723	1	0.0584248	2.08993	1	0.00123811	19.7486	1	1.61224	9.97886	0.883301	2.75508	14.7367	0.0248917	0.020872	6.29883	1	CUGGGGAGAUCCUCGAGGUUGG	experimental		mature miRNA	standard	MIMAT0015023	hsa-miR-3150a-3p	hsa-miR-3150a-3p
1174	hsa-miR-3150a-5p	0.0594838	8.13529	1	2.92639	14.6638	0.870034	14.2539	37.7824	0.738246	0.0335626	3.86937	1	0.0938836	20.0178	0.98526	0.0108252	13.7847	1	4.68374	19.4125	0.0522704	2.34012	5.32283	0.717699	CAACCUCGACGAUCUCCUCAGC	experimental		mature miRNA	standard	MIMAT0019206	hsa-miR-3150a-5p	hsa-miR-3150a-5p
1175	hsa-miR-3150b-3p	7.47446	8.56129	0.156033	149.843	139.225	0.374178	1158.95	74.1395	7.57239e-51	1216.46	88.4659	2.22373e-43	167.054	57.7249	0.00585616	43.5905	11.6635	2.16188e-08	114.814	41.6139	4.12815e-05	2142.6	173.55	5.91144e-31	UGAGGAGAUCGUCGAGGUUGG	experimental		mature miRNA	standard	MIMAT0018194	hsa-miR-3150b-3p	hsa-miR-3150b-3p
1176	hsa-miR-3150b-5p	0.0455795	3.50493	1	18.9331	20.0232	0.50439	11.01	17.2836	0.580698	0.0291539	2.15043	1	1.0174	17.5504	0.882733	3.71447	8.46173	0.504717	6.20312	21.6608	0.0872718	3.48197	5.64385	0.588943	CAACCUCGAGGAUCUCCCCAGC	experimental		mature miRNA	standard	MIMAT0019226	hsa-miR-3150b-5p	hsa-miR-3150b-5p
1177	hsa-miR-3151-3p	0.0377997	5.10648	1	227.198	256.646	0.486348	34.6791	29.2797	0.388486	6.11604	3.32417	0.232435	0.00261362	15.6709	1	7.24187	11.7958	0.347878	8.18397	15.2704	0.0195206	41.6005	53.6716	0.564072	CCUGAUCCCACAGCCCACCU	experimental		mature miRNA	standard	MIMAT0027026	hsa-miR-3151-3p	hsa-miR-3151-3p
1178	hsa-miR-3151-5p	0.0566807	5.4679	1	0.0119586	3.29798	1	0.276748	4.61706	0.953471	0.0459799	2.77567	1	0.00168173	14.004	1	4.2263	7.72668	0.503793	19.735	18.2136	7.71495e-09	39.3167	37.2438	0.530258	GGUGGGGCAAUGGGAUCAGGU	experimental		mature miRNA	standard	MIMAT0015024	hsa-miR-3151-5p	hsa-miR-3151-5p
1179	hsa-miR-3152-3p	0.0574956	5.78989	1	0.774685	5.47083	0.900189	2.83673	9.67389	0.811381	1.24745	3.02656	0.842889	3.23642	14.8672	0.611611	6.25555	8.065	0.307924	4.49612	10.7943	0.00127811	0.0142609	4.01774	1	UGUGUUAGAAUAGGGGCAAUAA	experimental		mature miRNA	standard	MIMAT0015025	hsa-miR-3152-3p	hsa-miR-3152-3p
1180	hsa-miR-3152-5p	0.0606323	4.39228	1	0.0112236	4.01521	1	4.44014	9.02263	0.67936	0.0480898	2.28597	1	0.00161131	15.7682	1	6.98512	10.2429	0.439718	2.07113	12.6357	0.0286267	2.05529	7.37487	0.852153	AUUGCCUCUGUUCUAACACAAG	experimental		mature miRNA	standard	MIMAT0019207	hsa-miR-3152-5p	hsa-miR-3152-5p
1181	hsa-miR-3153	0.0509607	4.69845	1	6.42945	4.00875	0.264353	6.58404	3.77772	0.149982	1.31568	1.54514	0.645055	1.53415	16.8395	0.836516	0.0103417	10.8981	1	3.13934	15.5207	0.0470628	4.08918	4.55433	0.341778	GGGGAAAGCGAGUAGGGACAUUU	experimental		mature miRNA	standard	MIMAT0015026	hsa-miR-3153	hsa-miR-3153
1182	hsa-miR-3154	1.29677	5.53149	0.923298	0.523122	4.53855	0.918671	10.7803	9.23451	0.401236	4.98085	3.34398	0.361453	11.1518	11.4527	0.0986872	6.62028	7.33087	0.253332	26.4239	30.0789	0.00202789	0.0168604	7.33701	1	CAGAAGGGGAGUUGGGAGCAGA	experimental		mature miRNA	standard	MIMAT0015028	hsa-miR-3154	hsa-miR-3154
1183	hsa-miR-3155a	0.0982895	2.7901	1	0.0071778	5.58269	1	0.409791	5.23963	0.939291	0.0511313	3.09461	1	0.00114715	19.2477	1	0.0143194	8.36719	1	12.2542	24.451	0.000158364	0.0192426	6.47894	1	CCAGGCUCUGCAGUGGGAACU	experimental		mature miRNA	standard	MIMAT0015029	hsa-miR-3155a	hsa-miR-3155a
1184	hsa-miR-3155b	0.0961007	6.60559	1	0.006776	5.5898	1	0.00856111	4.88158	1	0.0445381	2.25895	1	1.22331	22.7113	0.836792	0.0131482	9.97913	1	8.84531	22.9811	0.000654799	0.0153002	5.03983	1	CCAGGCUCUGCAGUGGGA	experimental		mature miRNA	standard	MIMAT0019012	hsa-miR-3155b	hsa-miR-3155b
1185	hsa-miR-3156-3p	0.0465385	6.42234	1	0.0101788	4.35916	1	7.77709	4.83376	0.164753	1.79684	3.01285	0.752479	12.69	15.8325	0.154985	1.2583	8.66559	0.854549	15.2165	16.921	5.21951e-06	1.55831	6.76173	0.881805	CUCCCACUUCCAGAUCUUUCU	experimental		mature miRNA	standard	MIMAT0019209	hsa-miR-3156-3p	hsa-miR-3156-3p
1186	hsa-miR-3156-5p	0.07952	5.20322	1	0.00841728	3.42433	1	0.00998992	5.24993	1	6.36937	2.9836	0.309607	3.47604	32.0134	0.773968	0.0652928	8.22414	0.994609	6.76787	27.4372	0.0438432	0.016211	7.21031	1	AAAGAUCUGGAAGUGGGAGACA	experimental		mature miRNA	standard	MIMAT0015030	hsa-miR-3156-5p	hsa-miR-3156-5p
1187	hsa-miR-3157-3p	0.0679244	5.30871	1	246.334	16.0602	1.85847e-45	4.34079	5.221	0.500352	0.0357492	3.07919	1	0.00152666	12.0981	1	5.64029	9.97644	0.449076	13.9911	23.1643	0.00392525	0.0131058	7.51851	1	CUGCCCUAGUCUAGCUGAAGCU	experimental		mature miRNA	standard	MIMAT0019210	hsa-miR-3157-3p	hsa-miR-3157-3p
1188	hsa-miR-3157-5p	0.0609147	5.68527	1	0.0089078	3.70118	1	0.32343	7.03841	0.967362	4.71311	3.03082	0.420215	6.08743	17.442	0.444735	6.89907	11.135	0.441896	13.9923	20.9512	0.000327449	0.0172874	7.93849	1	UUCAGCCAGGCUAGUGCAGUCU	experimental		mature miRNA	standard	MIMAT0015031	hsa-miR-3157-5p	hsa-miR-3157-5p
1189	hsa-miR-3158-3p	0.0694114	5.77261	1	0.00788622	2.55559	1	0.0077324	8.09448	1	0.0361856	2.57032	1	7.07827	11.8759	0.1233	0.0106808	6.333	1	122.108	83.9724	0.000797012	3.57992	3.82685	0.480701	AAGGGCUUCCUCUCUGCAGGAC	experimental		mature miRNA	standard	MIMAT0015032	hsa-miR-3158-3p	hsa-miR-3158-3p
1190	hsa-miR-3158-5p	7.52656	6.96962	0.498583	0.852112	4.66775	0.879888	8.45752	6.53195	0.382873	2.91221	3.28431	0.639378	8.21577	17.9726	0.439114	13.9609	11.0452	0.119944	21.824	21.0926	0.000147826	0.0184938	7.89074	1	CCUGCAGAGAGGAAGCCCUUC	experimental		mature miRNA	standard	MIMAT0019211	hsa-miR-3158-5p	hsa-miR-3158-5p
1191	hsa-miR-3159	0.0602298	3.0413	1	1.46837	4.27829	0.785755	0.00845191	7.393	1	0.0328721	3.63588	1	13.956	17.7442	0.112592	0.00998778	12.6805	1	8.11721	20.0761	0.00213881	21.2958	41.2837	0.614202	UAGGAUUACAAGUGUCGGCCAC	experimental		mature miRNA	standard	MIMAT0015033	hsa-miR-3159	hsa-miR-3159
1192	hsa-miR-3160-3p	0.0622357	3.75291	1	0.0141922	3.58169	1	0.0104092	5.68432	1	8.37643	2.60032	0.164734	0.00190513	15.255	1	0.0127365	13.6207	1	7.56624	15.6833	0.000119013	175.181	32.4478	4.18438e-05	AGAGCUGAGACUAGAAAGCCCA	experimental		mature miRNA	standard	MIMAT0015034	hsa-miR-3160-3p	hsa-miR-3160-3p
1193	hsa-miR-3160-5p	0.0768116	3.95065	1	0.00644642	4.20274	1	2.45908	6.46285	0.704069	0.0361205	3.37908	1	15.7769	38.6193	0.3307	0.0122469	7.84733	1	6.21136	23.0657	0.0148887	0.0143243	6.84115	1	GGCUUUCUAGUCUCAGCUCUCC	experimental		mature miRNA	standard	MIMAT0019212	hsa-miR-3160-5p	hsa-miR-3160-5p
1194	hsa-miR-3161	0.0681724	4.13207	1	0.00730379	4.45453	1	136.21	25.564	1.20633e-06	0.0389497	3.99235	1	0.112821	10.5183	0.962164	0.307735	8.93134	0.973531	6.025	11.0082	1.03594e-05	0.0178918	5.73821	1	CUGAUAAGAACAGAGGCCCAGAU	experimental		mature miRNA	standard	MIMAT0015035	hsa-miR-3161	hsa-miR-3161
1195	hsa-miR-3162-3p	5.47487	5.36973	0.591462	5.90251	7.87463	0.55306	4.06143	8.38722	0.728481	3.85641	3.06145	0.440555	32.983	77.8956	0.544784	0.0118817	10.8717	1	11.0036	11.4571	1.28425e-06	0.12721	5.47381	0.986499	UCCCUACCCCUCCACUCCCCA	experimental		mature miRNA	standard	MIMAT0019213	hsa-miR-3162-3p	hsa-miR-3162-3p
1196	hsa-miR-3162-5p	81.1524	16.4879	3.59387e-10	0.0187783	3.49252	1	148.205	20.5969	4.03899e-09	147.631	20.7727	2.39024e-11	1.20087	17.6619	0.929948	136.834	32.6832	1.43497e-06	58.1457	20.4432	2.41658e-10	229.174	68.8139	0.033562	UUAGGGAGUAGAAGGGUGGGGAG	experimental		mature miRNA	standard	MIMAT0015036	hsa-miR-3162-5p	hsa-miR-3162-5p
1197	hsa-miR-3163	0.0973909	6.19604	1	0.00857039	4.37026	1	0.00977078	5.70402	1	0.057916	1.87585	1	0.00122398	16.7137	1	1.08192	11.1991	0.93141	3.6622	13.2668	0.00197874	0.0206926	5.89632	1	UAUAAAAUGAGGGCAGUAAGAC	experimental		mature miRNA	standard	MIMAT0015037	hsa-miR-3163	hsa-miR-3163
1198	hsa-miR-3164	72.9774	80.6297	0.557958	0.010283	3.30589	1	0.0130528	5.28116	1	0.0697202	2.11054	1	0.00160724	17.3957	1	4.36293	13.7924	0.80907	2.28276	20.4266	0.220362	0.0305135	9.59192	1	UGUGACUUUAAGGGAAAUGGCG	experimental		mature miRNA	standard	MIMAT0015038	hsa-miR-3164	hsa-miR-3164
1199	hsa-miR-3165	0.0630993	5.35218	1	0.686348	2.31975	0.746683	17.0928	37.39	0.684661	0.0315284	3.48134	1	7.72449	35.8058	0.603282	0.412787	6.67105	0.94359	4.23902	9.68519	0.000587328	0.0126696	6.38382	1	AGGUGGAUGCAAUGUGACCUCA	experimental		mature miRNA	standard	MIMAT0015039	hsa-miR-3165	hsa-miR-3165
1200	hsa-miR-3166	0.0731062	5.66013	1	0.00953237	3.58395	1	0.00868928	4.64919	1	0.0433441	2.77674	1	1.3937	15.6515	0.77998	0.0123125	10.6801	1	2.58605	13.3192	0.0138181	4.64416	26.9337	0.903786	CGCAGACAAUGCCUACUGGCCUA	experimental		mature miRNA	standard	MIMAT0015040	hsa-miR-3166	hsa-miR-3166
1201	hsa-miR-3167	0.0664547	4.34794	1	0.0112412	4.63494	1	0.685116	6.45488	0.919882	0.0480821	3.80045	1	0.0015314	8.10542	1	0.012921	9.86788	1	3.01797	14.1581	0.0147333	45.354	62.2212	0.635925	AGGAUUUCAGAAAUACUGGUGU	experimental		mature miRNA	standard	MIMAT0015042	hsa-miR-3167	hsa-miR-3167
1202	hsa-miR-3168	412.971	41.7528	8.88891e-22	0.00817973	2.67902	1	6.95197	9.67812	0.61273	0.0499729	2.71406	1	1.405	20.769	0.855107	0.0175793	6.30697	1	2.65051	16.6836	0.108059	0.0251602	7.80589	1	GAGUUCUACAGUCAGAC	experimental		mature miRNA	standard	MIMAT0015043	hsa-miR-3168	hsa-miR-3168
1203	hsa-miR-3169	269.054	35.8228	1.39971e-12	0.00799198	5.12171	1	18.6296	15.6574	0.387405	0.0472834	2.76509	1	2.45193	17.9094	0.730896	0.0170304	9.1376	1	2.80801	15.8213	0.0827748	0.0242283	5.46872	1	UAGGACUGUGCUUGGCACAUAG	experimental		mature miRNA	standard	MIMAT0015044	hsa-miR-3169	hsa-miR-3169
1204	hsa-miR-3170	0.0527728	5.52649	1	0.00999452	4.04534	1	2.04695	6.85233	0.787512	2.91992	1.8678	0.390549	28.3128	52.8862	0.385698	0.0111995	6.31889	1	5.36422	16.4199	0.00922443	3.42275	9.81306	0.801513	CUGGGGUUCUGAGACAGACAGU	experimental		mature miRNA	standard	MIMAT0015045	hsa-miR-3170	hsa-miR-3170
1205	hsa-miR-3171	0.082732	2.97234	1	0.00779927	5.31488	1	0.009037	5.97574	1	0.044507	4.37417	1	2.95785	37.9637	0.810383	1.12604	6.79435	0.86476	3.33578	14.4198	0.0114113	0.0161888	3.26117	1	AGAUGUAUGGAAUCUGUAUAUAUC	experimental		mature miRNA	standard	MIMAT0015046	hsa-miR-3171	hsa-miR-3171
1206	hsa-miR-3173-3p	14.8568	6.82821	0.186649	0.0118304	3.68281	1	20.8076	15.6892	0.429163	11.8525	4.57421	0.280146	0.00218062	20.3123	1	17.142	12.2806	0.191346	3.85768	12.2349	0.0322754	0.0313804	5.82538	1	AAAGGAGGAAAUAGGCAGGCCA	experimental		mature miRNA	standard	MIMAT0015048	hsa-miR-3173-3p	hsa-miR-3173-3p
1207	hsa-miR-3173-5p	192.404	21.8605	2.77217e-19	0.0105333	3.87952	1	83.7184	91.645	0.453888	0.041777	3.57181	1	2.78219	13.2294	0.666847	0.0149003	5.68318	1	4.53219	17.7372	0.0418446	9.67226	5.71265	0.430965	UGCCCUGCCUGUUUUCUCCUUU	experimental		mature miRNA	standard	MIMAT0019214	hsa-miR-3173-5p	hsa-miR-3173-5p
1208	hsa-miR-3174	4.18214	4.93202	0.668001	0.0102099	5.12719	1	8.49114	5.06717	0.263542	10.6682	4.69044	0.212432	3.16962	14.3111	0.662111	10.1375	7.71079	0.155625	7.95999	19.4781	0.0220647	0.0230581	5.46644	1	UAGUGAGUUAGAGAUGCAGAGCC	experimental		mature miRNA	standard	MIMAT0015051	hsa-miR-3174	hsa-miR-3174
1209	hsa-miR-3175	0.0665427	2.75605	1	0.00745406	4.00886	1	1.90204	4.0217	0.651375	0.0366723	3.59932	1	20.1525	73.1145	0.563746	1.61307	9.1549	0.841537	3.4795	14.1715	0.0197922	0.0155256	5.81103	1	CGGGGAGAGAACGCAGUGACGU	experimental		mature miRNA	standard	MIMAT0015052	hsa-miR-3175	hsa-miR-3175
1210	hsa-miR-3176	250.085	36.0313	2.7057e-10	239.94	24.8972	1.32322e-17	0.0153581	4.34716	1	9.82717	3.26354	0.156318	0.100269	22.1055	0.989316	0.0152688	10.1889	1	4.68452	17.2813	0.0848608	0.0172984	4.60096	1	ACUGGCCUGGGACUACCGG	experimental		mature miRNA	standard	MIMAT0015053	hsa-miR-3176	hsa-miR-3176
1211	hsa-miR-3177-3p	14.0483	22.327	0.625667	421.268	55.853	3.03739e-11	12.2057	7.85975	0.312133	0.0379548	2.98156	1	0.00238444	20.7386	1	5.13489	7.46983	0.400093	8.20847	9.86084	6.49965e-05	13.1087	13.2589	0.555758	UGCACGGCACUGGGGACACGU	experimental		mature miRNA	standard	MIMAT0015054	hsa-miR-3177-3p	hsa-miR-3177-3p
1212	hsa-miR-3177-5p	2.25802	3.95894	0.863796	0.0093014	4.95068	1	6.15632	8.53019	0.595233	0.0539618	3.4217	1	0.00155709	16.3093	1	10.3843	6.57035	0.124014	4.28343	14.3782	0.0118646	0.0261773	5.74182	1	UGUGUACACACGUGCCAGGCGCU	experimental		mature miRNA	standard	MIMAT0019215	hsa-miR-3177-5p	hsa-miR-3177-5p
1213	hsa-miR-3178	968.388	50.5229	1.23264e-88	272.816	44.4948	2.16231e-08	1346.44	71.0288	1.75972e-75	960.138	51.2567	1.78981e-79	329.801	61.7814	2.18443e-07	372.128	40.1706	2.86718e-25	1087.25	35.0857	2.8536e-234	792.893	78.2699	5.81905e-18	GGGGCGCGGCCGGAUCG	experimental		mature miRNA	standard	MIMAT0015055	hsa-miR-3178	hsa-miR-3178
1214	hsa-miR-3179	0.0837543	3.50599	1	0.0103159	4.78953	1	0.0111381	6.98729	1	3.43648	3.26625	0.742382	0.00152261	16.3909	1	5.13427	6.50215	0.435742	3.46392	12.1414	0.00631341	0.0222071	5.47936	1	AGAAGGGGUGAAAUUUAAACGU	experimental		mature miRNA	standard	MIMAT0015056	hsa-miR-3179	hsa-miR-3179
1215	hsa-miR-3180-3p	56.1807	46.6099	0.485533	0.00800715	3.85337	1	0.0113337	4.9652	1	0.0541253	2.25135	1	1.55308	16.2837	0.773896	0.0168443	8.75171	1	3.4519	19.6034	0.0518861	0.0218629	4.77277	1	UGGGGCGGAGCUUCCGGAGGCC	experimental		mature miRNA	standard	MIMAT0015058	hsa-miR-3180-3p	hsa-miR-3180-3p
1216	hsa-miR-3180-5p	9.94434	8.03935	0.320506	9.54372	7.42041	0.477412	0.0111556	7.53201	1	0.0358419	2.2374	1	7.735	15.5573	0.428023	6.18617	10.3907	0.420385	9.78911	20.6489	0.0108802	375.625	34.996	5.32857e-22	CUUCCAGACGCUCCGCCCCACGUCG	experimental		mature miRNA	standard	MIMAT0015057	hsa-miR-3180-5p	hsa-miR-3180-5p
1217	hsa-miR-3180	8.84389	3.7579	0.138378	212.029	21.9195	8.27266e-15	0.0119568	7.36002	1	0.0387096	2.98342	1	0.220127	19.9937	0.977137	8.10714	12.8452	0.412458	5.77329	9.86823	0.000507512	15.3969	11.8996	0.366959	UGGGGCGGAGCUUCCGGAG	experimental		mature miRNA	standard	MIMAT0018178	hsa-miR-3180	hsa-miR-3180
1218	hsa-miR-3181	2.40535	4.70717	0.792365	0.0125831	6.99659	1	0.457519	8.12422	0.965337	3.61404	3.05069	0.57985	7.63949	20.1777	0.530347	1.68038	10.7026	0.866151	6.8542	18.2059	0.0162517	5.8156	7.19776	0.672606	AUCGGGCCCUCGGCGCCGG	experimental		mature miRNA	standard	MIMAT0015061	hsa-miR-3181	hsa-miR-3181
1219	hsa-miR-3182	0.0410117	4.493	1	0.0152055	3.60338	1	78.993	49.4588	0.194911	114.83	15.4779	1.63574e-10	0.00249011	17.4666	1	1.39114	10.1504	0.87551	11.1539	16.0214	0.000492626	39.5332	19.7235	0.279412	GCUUCUGUAGUGUAGUC	experimental		mature miRNA	standard	MIMAT0015062	hsa-miR-3182	hsa-miR-3182
1220	hsa-miR-3183	11.5286	4.28281	0.194916	221.411	26.4299	2.57258e-14	0.0115533	9.02613	1	0.0362337	2.83777	1	6.07938	18.0374	0.474275	3.57135	9.19818	0.642267	9.43017	19.3654	0.00818365	0.0131872	11.5891	1	GCCUCUCUCGGAGUCGCUCGGA	experimental		mature miRNA	standard	MIMAT0015063	hsa-miR-3183	hsa-miR-3183
1221	hsa-miR-3184-3p	0.0947263	4.10109	1	0.0167659	4.6887	0.996849	0.00988447	6.67519	1	0.0569411	3.15436	1	0.0012535	15.2576	1	2.12531	13.2611	0.879454	3.4082	11.0487	0.000675072	0.0203029	4.88496	1	AAAGUCUCGCUCUCUGCCCCUCA	experimental		mature miRNA	standard	MIMAT0022731	hsa-miR-3184-3p	hsa-miR-3184-3p
1222	hsa-miR-3184-5p	4.01661	2.6903	0.51106	0.0134881	3.92258	1	0.694356	14.7617	0.973882	2.81181	1.55266	0.565489	0.00210244	13.9002	1	0.753247	11.2051	0.955143	3.19425	18.1318	0.133649	4.29464	5.7304	0.764426	UGAGGGGCCUCAGACCGAGCUUUU	experimental		mature miRNA	standard	MIMAT0015064	hsa-miR-3184-5p	hsa-miR-3184-5p
1223	hsa-miR-3185	23.3925	6.9208	1.07057e-05	0.0166185	5.39053	1	60.315	13.3041	0.000806239	26.9886	5.30046	7.74433e-05	25.2492	19.8996	0.177154	74.7208	18.8019	1.6704e-06	22.3247	19.2941	0.000146103	112.457	51.7258	0.193848	AGAAGAAGGCGGUCGGUCUGCGG	experimental		mature miRNA	standard	MIMAT0015065	hsa-miR-3185	hsa-miR-3185
1224	hsa-miR-3186-3p	0.0947603	4.29638	1	0.00715934	3.20671	1	0.00883686	7.02967	1	0.0451195	5.3818	1	4.50822	21.3076	0.51039	0.013558	13.844	1	1.53967	10.0862	0.0218056	0.0148758	6.53401	1	UCACGCGGAGAGAUGGCUUUG	experimental		mature miRNA	standard	MIMAT0015068	hsa-miR-3186-3p	hsa-miR-3186-3p
1225	hsa-miR-3186-5p	14.9474	4.76939	0.255075	0.00808659	3.42366	1	0.011003	5.93156	1	0.0544831	4.03892	1	0.900264	19.0821	0.874239	0.0165902	16.6464	1	1.65645	12.3167	0.0661961	0.0207543	6.2481	1	CAGGCGUCUGUCUACGUGGCUU	experimental		mature miRNA	standard	MIMAT0015067	hsa-miR-3186-5p	hsa-miR-3186-5p
1226	hsa-miR-3187-3p	12.7317	5.78498	0.461741	0.00809901	3.68697	1	0.0109931	5.74194	1	0.0563941	3.81239	1	0.203464	9.52087	0.930487	0.0167345	7.63841	1	2.33345	13.2864	0.02536	0.0214796	6.0017	1	UUGGCCAUGGGGCUGCGCGG	experimental		mature miRNA	standard	MIMAT0015069	hsa-miR-3187-3p	hsa-miR-3187-3p
1227	hsa-miR-3187-5p	6.02886	3.65105	0.638993	0.00797521	2.98688	1	0.0106186	2.53901	1	0.0521437	3.14208	1	2.41525	16.3528	0.656848	0.0160133	10.0057	1	1.08501	12.3127	0.182148	0.0191922	4.11732	1	CCUGGGCAGCGUGUGGCUGAAGG	experimental		mature miRNA	standard	MIMAT0019216	hsa-miR-3187-5p	hsa-miR-3187-5p
1228	hsa-miR-3188	0.0743058	4.26388	1	1.91879	7.66336	0.788033	5.28385	6.52146	0.463327	0.0333803	2.63981	1	2.91188	11.1312	0.436414	0.0115752	8.97425	1	2.06808	8.53855	0.0124362	0.0117068	9.23153	1	AGAGGCUUUGUGCGGAUACGGGG	experimental		mature miRNA	standard	MIMAT0015070	hsa-miR-3188	hsa-miR-3188
1229	hsa-miR-3189-3p	0.0684428	3.63873	1	8.37136	19.2483	0.749708	2.88759	9.53097	0.794497	0.0401996	3.7911	1	0.00153785	23.0879	1	0.011836	14.0255	1	2.16368	10.5095	0.0383622	2.11544	16.5919	0.923591	CCCUUGGGUCUGAUGGGGUAG	experimental		mature miRNA	standard	MIMAT0015071	hsa-miR-3189-3p	hsa-miR-3189-3p
1230	hsa-miR-3189-5p	8.60679	14.31	0.816268	4.05922	8.46725	0.689923	0.0109499	8.2982	1	0.0424235	3.72904	1	1.9377	13.655	0.7018	0.0134765	10.1336	1	2.851	10.5082	0.00812349	0.14689	13.9065	0.994153	UGCCCCAUCUGUGCCCUGGGUAGGA	experimental		mature miRNA	standard	MIMAT0019217	hsa-miR-3189-5p	hsa-miR-3189-5p
1231	hsa-miR-3190-3p	43.642	54.4906	0.681042	0.00835537	5.43535	1	0.0115837	5.29959	1	0.0575554	4.98847	1	0.428503	18.9035	0.935581	0.017453	14.1221	1	1.61023	11.4486	0.0565074	0.0225551	6.81338	1	UGUGGAAGGUAGACGGCCAGAGA	experimental		mature miRNA	standard	MIMAT0022839	hsa-miR-3190-3p	hsa-miR-3190-3p
1232	hsa-miR-3190-5p	7.72057	4.75956	0.652731	8.87631	7.88912	0.349509	0.0117736	4.61842	1	0.0539093	3.76584	1	0.00141922	15.8213	1	0.0154378	10.0281	1	2.87352	16.6993	0.0793919	0.0175676	4.20014	1	UCUGGCCAGCUACGUCCCCA	experimental		mature miRNA	standard	MIMAT0015073	hsa-miR-3190-5p	hsa-miR-3190-5p
1233	hsa-miR-3191-3p	0.111132	4.86838	1	0.0236791	5.24349	0.995773	0.00975419	7.05515	1	0.0584761	3.86297	1	0.00113945	14.3328	1	0.0153916	5.15808	1	1.27612	15.6155	0.191073	0.0184516	6.59805	1	UGGGGACGUAGCUGGCCAGACAG	experimental		mature miRNA	standard	MIMAT0015075	hsa-miR-3191-3p	hsa-miR-3191-3p
1234	hsa-miR-3191-5p	14.8933	17.5189	0.698837	0.00770194	7.3724	1	7.30287	7.47037	0.458695	0.046751	2.59134	1	0.623649	11.2219	0.854498	0.0158386	10.378	1	2.83931	8.78353	0.000718657	0.0214589	4.37441	1	CUCUCUGGCCGUCUACCUUCCA	experimental		mature miRNA	standard	MIMAT0022732	hsa-miR-3191-5p	hsa-miR-3191-5p
1235	hsa-miR-3192-3p	1.62421	6.15426	0.940422	0.00934944	7.03333	1	13.4922	19.871	0.618749	0.0533376	3.16152	1	0.00155547	16.8669	1	9.11352	11.6244	0.448582	2.6976	13.2422	0.0549004	0.025805	3.96697	1	CUCUGAUCGCCCUCUCAGCUC	experimental		mature miRNA	standard	MIMAT0027027	hsa-miR-3192-3p	hsa-miR-3192-3p
1236	hsa-miR-3192-5p	0.0721514	5.98731	1	0.0101896	6.77072	1	0.0108528	5.34403	1	3.34428	2.50104	0.608943	1.37211	16.7719	0.820306	8.18203	13.3735	0.501879	0.854367	14.3964	0.469305	0.0182658	8.38546	1	UCUGGGAGGUUGUAGCAGUGGAA	experimental		mature miRNA	standard	MIMAT0015076	hsa-miR-3192-5p	hsa-miR-3192-5p
1237	hsa-miR-3193	0.0713847	3.33364	1	0.0094361	3.65805	1	1.62217	6.02	0.804068	0.0448024	2.7731	1	0.0725571	17.7216	0.985429	0.0132921	7.96576	1	0.799604	15.9128	0.442936	1.34179	4.63856	0.859863	UCCUGCGUAGGAUCUGAGGAGU	experimental		mature miRNA	standard	MIMAT0015077	hsa-miR-3193	hsa-miR-3193
1238	hsa-miR-3194-3p	0.0760428	4.17913	1	0.00888826	3.89477	1	4.15872	5.87953	0.556355	0.0507849	3.71582	1	0.00137453	14.0554	1	7.94195	11.3723	0.462173	2.27677	10.4949	0.0213924	0.0217327	5.49977	1	AGCUCUGCUGCUCACUGGCAGU	experimental		mature miRNA	standard	MIMAT0019218	hsa-miR-3194-3p	hsa-miR-3194-3p
1239	hsa-miR-3194-5p	1.91371	4.34588	0.883078	0.0103202	4.02576	1	12.9707	10.203	0.35119	0.0520559	1.69677	1	0.00168158	23.9045	1	9.72473	8.09385	0.227587	3.41668	15.5817	0.0567646	0.189366	5.63275	0.989495	GGCCAGCCACCAGGAGGGCUG	experimental		mature miRNA	standard	MIMAT0015078	hsa-miR-3194-5p	hsa-miR-3194-5p
1240	hsa-miR-3195	94.2461	16.2515	1.05999e-13	240.626	41.1246	1.64833e-06	75.0839	13.0302	4.78773e-05	61.9552	14.6528	2.74418e-05	73.935	25.0896	0.00595725	91.6813	26.4245	6.19817e-06	87.4969	16.6616	6.10078e-18	25.8867	8.99888	0.0711224	CGCGCCGGGCCCGGGUU	experimental		mature miRNA	standard	MIMAT0015079	hsa-miR-3195	hsa-miR-3195
1241	hsa-miR-3196	2677.15	99.2307	1.15736e-164	1522.04	130.251	1.93576e-31	2055.8	106.727	4.09103e-79	871.213	53.0777	2.1933e-61	1824.41	155.539	1.46857e-32	2257.4	58.8509	0	2190.89	45.3375	0	1368.55	75.5524	3.66599e-57	CGGGGCGGCAGGGGCCUC	experimental		mature miRNA	standard	MIMAT0015080	hsa-miR-3196	hsa-miR-3196
1242	hsa-miR-3197	0.0284175	3.49598	1	0.0150444	4.80494	1	85.6851	22.4567	0.000822152	49.6755	15.5589	0.00248687	16.9588	18.715	0.242423	80.0819	26.8178	5.1992e-05	28.2835	24.2149	0.000176628	94.3148	21.1853	0.00132599	GGAGGCGCAGGCUCGGAAAGGCG	experimental		mature miRNA	standard	MIMAT0015082	hsa-miR-3197	hsa-miR-3197
1243	hsa-miR-3198	0.0955446	5.42524	1	0.00916748	2.94659	1	0.0101301	6.51666	1	0.0600039	2.18189	1	0.00126108	13.0847	1	2.61323	12.1009	0.843226	1.19255	11.8185	0.145186	0.0211637	5.89538	1	GUGGAGUCCUGGGGAAUGGAGA	experimental		mature miRNA	standard	MIMAT0015083	hsa-miR-3198	hsa-miR-3198
1244	hsa-miR-3199	0.0898754	4.78671	1	0.0107454	3.5008	1	0.0114216	5.76059	1	1.2781	2.67215	0.907304	0.00145828	13.1807	1	2.35772	12.1626	0.866653	0.306467	14.423	0.721231	0.0220365	7.61845	1	AGGGACUGCCUUAGGAGAAAGUU	experimental		mature miRNA	standard	MIMAT0015084	hsa-miR-3199	hsa-miR-3199
1245	hsa-miR-3200-3p	1.34728	3.80929	0.94895	0.00798873	5.46637	1	0.0102456	7.31755	1	0.0547898	2.68037	1	0.158074	17.6454	0.967866	0.0158708	10.9798	1	1.14326	16.1163	0.266033	0.0191857	4.63332	1	CACCUUGCGCUACUCAGGUCUG	experimental		mature miRNA	standard	MIMAT0015085	hsa-miR-3200-3p	hsa-miR-3200-3p
1246	hsa-miR-3200-5p	0.962543	5.13879	0.970988	0.00880536	6.71328	1	1.48707	7.11857	0.869335	0.0574249	4.50284	1	0.00136501	19.48	1	0.157795	9.89542	0.991037	0.916819	12.5117	0.295633	0.0232511	4.54314	1	AAUCUGAGAAGGCGCACAAGGU	experimental		mature miRNA	standard	MIMAT0017392	hsa-miR-3200-5p	hsa-miR-3200-5p
1247	hsa-miR-3201	0.0980977	3.97619	1	0.0096354	3.91386	1	0.0104906	4.79154	1	0.0630783	2.45746	1	0.00126574	15.6366	1	1.65942	7.03784	0.842201	0.262765	12.7741	0.688118	0.021226	3.72639	1	GGGAUAUGAAGAAAAAU	experimental		mature miRNA	standard	MIMAT0015086	hsa-miR-3201	hsa-miR-3201
1248	hsa-miR-3202	60.8813	13.1302	5.3684e-07	0.0175907	5.27685	1	7.67828	9.15061	0.641346	33.265	8.54176	0.0275336	0.00305104	18.9671	1	58.4477	20.0464	0.00205811	7.4437	12.9675	0.00354864	16.9419	8.04692	0.474916	UGGAAGGGAGAAGAGCUUUAAU	experimental		mature miRNA	standard	MIMAT0015089	hsa-miR-3202	hsa-miR-3202
1249	hsa-miR-3529-3p	0.056814	4.83691	1	0.0075954	4.31633	1	18.6064	23.8985	0.489586	0.404952	2.14662	0.937833	2.32701	16.7624	0.711117	7.66287	15.1338	0.498907	76.8254	25.398	5.87225e-15	0.0173141	4.61755	1	AACAACAAAAUCACUAGUCUUCCA	experimental		mature miRNA	standard	MIMAT0022741	hsa-miR-3529-3p	hsa-miR-3529-3p
1250	hsa-miR-3529-5p	0.0710777	5.01119	1	0.385692	7.58979	0.957203	0.00897202	6.37754	1	0.036504	2.95534	1	7.16995	16.0738	0.266051	14.0377	12.1879	0.111789	19.036	12.5108	8.86263e-15	0.0135165	4.84678	1	AGGUAGACUGGGAUUUGUUGUU	experimental		mature miRNA	standard	MIMAT0019828	hsa-miR-3529-5p	hsa-miR-3529-5p
[truncated: 1,305 more rows]
